# Supplementary material for: The Rapidly Evolving X-linked miR-506 Family Finetunes Spermatogenesis to Enhance Sperm Competition
Source: bioRxiv preprint, doi:10.1101/2023.06.14.544876, version 2 (2024-01-20)
Supplement: Table S5 [file 544876_file13.xlsx]

## Sheet: miR-465_KO
Symbol	baseMean	log2FoldChange	pvalue	padj	Cohen_d	microrna.org	Targetscan	mirwalk	mirdb
0610009B22Rik	77.9873	-1.09433	0.000964	0.00400245	1.7948	FALSE	FALSE	FALSE	FALSE
0610009L18Rik	243.236	0.462875	0.0332	0.0802344	1.97144	FALSE	TRUE	FALSE	FALSE
Dele1	213.935	0.589987	0.00389	0.0133264	3.67791	TRUE	TRUE	FALSE	FALSE
Sanbr	323.428	-1.38751	7.01e-08	8.16e-07	2.70908	FALSE	FALSE	FALSE	FALSE
0610010K14Rik	30.2067	1.90173	0.000146	0.000768213	4.87438	TRUE	TRUE	FALSE	FALSE
Mettl26	64.5752	0.835212	0.00669	0.0210866	3.84878	FALSE	FALSE	FALSE	FALSE
0610012G03Rik	110.428	1.18959	4.53e-05	0.000272243	3.5179	FALSE	FALSE	TRUE	FALSE
0610030E20Rik	119.63	-0.577956	0.0276246	0.0687569	1.6491	TRUE	TRUE	TRUE	FALSE
0610039H22Rik	1.83561	-5.35654	0.0325668	0.0788534	0.816497	FALSE	FALSE	FALSE	FALSE
0610040B10Rik	17.6956	-1.03576	0.04607	0.10441	3.16973	FALSE	FALSE	FALSE	FALSE
Fmc1	44.7394	1.8161	1.23e-05	8.61e-05	3.98394	FALSE	FALSE	FALSE	FALSE
1110006O24Rik	128.467	-0.58691	0.041401	0.0959718	1.18843	FALSE	FALSE	FALSE	FALSE
Card19	23.9582	2.10414	0.00114	0.00462098	2.44177	TRUE	FALSE	FALSE	TRUE
Rab5if	37.512	1.40968	0.00172839	0.00663983	2.93736	FALSE	FALSE	FALSE	FALSE
Prorp	48.4383	-0.704929	0.0412269	0.0956547	1.90121	FALSE	FALSE	FALSE	FALSE
Bbln	122.511	2.20704	9.87e-11	2.02e-09	5.77868	FALSE	FALSE	FALSE	FALSE
1110017D15Rik	1330.48	0.761214	5.29e-06	4.03e-05	3.74667	FALSE	FALSE	FALSE	FALSE
1110019D14Rik	8.85168	-1.82915	0.0218941	0.0566596	3.09365	TRUE	FALSE	FALSE	FALSE
1110032A03Rik	1026.06	-0.668705	0.0110627	0.0319874	1.20729	TRUE	TRUE	TRUE	FALSE
Virma	313.597	-0.489146	0.0162544	0.0443516	2.17927	FALSE	FALSE	FALSE	FALSE
1110038F14Rik	22.8853	1.61648	0.00169239	0.00652496	7.20388	TRUE	TRUE	TRUE	FALSE
Cstpp1	194.49	0.675659	0.00692765	0.0216999	2.39598	TRUE	FALSE	FALSE	FALSE
1110059E24Rik	63.0106	-1.83666	4.1e-08	5.01e-07	2.87528	FALSE	FALSE	FALSE	FALSE
1110059G10Rik	20.4797	-1.37698	0.0170393	0.046188	1.33852	TRUE	TRUE	TRUE	FALSE
1110065P20Rik	168.18	2.39177	3.5e-10	6.43e-09	2.86535	FALSE	FALSE	FALSE	FALSE
Smim45	13.3105	4.29696	0.0027966	0.0100586	0.989264	FALSE	FALSE	FALSE	FALSE
1600010M07Rik	1.6571	-5.19129	0.0088517	0.026599	3.91637	FALSE	FALSE	FALSE	FALSE
1600012H06Rik	39.6599	-1.31349	0.00124677	0.00499122	2.29629	TRUE	TRUE	FALSE	FALSE
1700001C19Rik	819.522	0.561178	0.00338	0.0118278	2.66017	TRUE	FALSE	TRUE	FALSE
1700001D01Rik	2.54304	-3.13822	0.0357202	0.0849605	2.05671	FALSE	FALSE	FALSE	FALSE
1700001G01Rik	67.5564	-1.25374	0.00147407	0.00577142	1.58862	FALSE	FALSE	FALSE	FALSE
1700001G17Rik	16.3324	1.37232	0.0281859	0.0699812	2.53502	TRUE	FALSE	FALSE	FALSE
1700001J11Rik	1473.12	-1.00185	2.23e-07	2.35e-06	2.96703	FALSE	FALSE	FALSE	FALSE
1700001K19Rik	797.98	1.01383	4.08e-08	5e-07	3.70413	FALSE	FALSE	FALSE	FALSE
1700001L05Rik	1695.25	-0.683309	7.69e-07	7.08e-06	5.25063	FALSE	FALSE	FALSE	FALSE
1700001O22Rik	990.379	1.27855	1.97e-13	6.26e-12	8.76331	FALSE	FALSE	FALSE	FALSE
1700001P01Rik	168.674	0.823316	0.0035275	0.0122672	2.24937	FALSE	FALSE	FALSE	FALSE
1700003E16Rik	2191.39	1.06787	9.44e-12	2.29e-10	6.22966	FALSE	FALSE	FALSE	FALSE
1700003F12Rik	1711.19	2.48087	4.28e-30	8.84e-28	3.99473	FALSE	FALSE	TRUE	FALSE
1700003G18Rik	36.2573	-1.62317	0.000165888	0.000860561	1.95723	FALSE	FALSE	FALSE	FALSE
1700003I22Rik	72.7012	-0.639404	0.0411371	0.0954942	1.41054	TRUE	FALSE	FALSE	FALSE
1700003L19Rik	13.1266	-1.39501	0.0260177	0.0654478	1.41802	TRUE	FALSE	FALSE	FALSE
Cfap206	1953.58	-0.477414	0.0227147	0.0583757	1.3568	FALSE	FALSE	FALSE	FALSE
1700003P14Rik	161.001	-1.95022	1.86e-08	2.48e-07	1.83197	TRUE	FALSE	FALSE	FALSE
1700006A11Rik	594.995	-1.8358	3.18e-18	1.9e-16	3.71939	FALSE	FALSE	FALSE	FALSE
Cfap97d1	281.998	-1.17792	0.000191545	0.000977198	1.46424	FALSE	FALSE	FALSE	FALSE
1700006F04Rik	25.2898	-0.881601	0.0447718	0.102092	1.91743	FALSE	FALSE	FALSE	FALSE
Iqcm	386.063	-1.05181	7.29e-06	5.37e-05	2.18901	FALSE	FALSE	FALSE	FALSE
1700007F19Rik	41.9522	-2.2779	2.21e-08	2.88e-07	4.50858	FALSE	FALSE	FALSE	FALSE
Cfap299	261.336	-1.01352	0.000372686	0.00175071	1.79506	FALSE	FALSE	FALSE	FALSE
Fam24b	208.609	-0.552106	0.0128494	0.0363323	1.81583	FALSE	FALSE	FALSE	FALSE
Pierce1	77.4843	1.23472	2.93e-05	0.000184229	6.17305	FALSE	FALSE	FALSE	FALSE
1700007L15Rik	71.6233	0.856203	0.0189044	0.0501806	1.79555	FALSE	FALSE	FALSE	FALSE
1700007P06Rik	69.6766	-0.879919	0.00274312	0.0098897	3.16105	FALSE	FALSE	FALSE	FALSE
1700008O03Rik	84.1394	1.08185	0.0003	0.00144244	3.73978	TRUE	TRUE	FALSE	FALSE
1700008P02Rik	231.247	-0.94474	0.000282881	0.00136678	1.86437	FALSE	FALSE	FALSE	FALSE
1700009C05Rik	95.2753	-2.00825	2.61e-13	8.16e-12	5.17726	FALSE	FALSE	FALSE	FALSE
1700009J07Rik	520.284	-0.471018	0.00394168	0.0134729	2.76366	FALSE	FALSE	FALSE	FALSE
1700009N14Rik	1649	0.338214	0.0103	0.0302371	4.19824	FALSE	FALSE	TRUE	FALSE
1700010D01Rik	247.285	-0.812027	0.0109837	0.0317943	1.13625	FALSE	FALSE	FALSE	FALSE
1700010I02Rik	9.22187	-1.67312	0.0175203	0.0472664	2.16283	FALSE	FALSE	FALSE	FALSE
1700010I14Rik	1707.71	-0.511819	0.000209522	0.00105806	3.95513	FALSE	FALSE	FALSE	FALSE
1700010J16Rik	49.3746	-1.85271	2.32e-06	1.92e-05	2.58223	TRUE	FALSE	FALSE	FALSE
1700010K23Rik	18.8997	-1.24734	0.0366	0.0867165	1.02042	TRUE	FALSE	FALSE	FALSE
Krt88	209.846	0.657238	0.00605359	0.0194097	2.27138	FALSE	FALSE	FALSE	FALSE
1700011M02Rik	59.9435	1.5073	0.000497	0.00224288	1.89232	FALSE	FALSE	FALSE	FALSE
Cfap107	215.975	-0.547917	0.0363972	0.0863251	1.17766	FALSE	FALSE	FALSE	FALSE
1700013D24Rik	192.736	-0.681223	0.00491	0.0162522	2.02553	FALSE	FALSE	FALSE	FALSE
1700013G24Rik	1406.04	0.613347	4.34e-06	3.37e-05	6.98111	FALSE	FALSE	FALSE	FALSE
1700013H16Rik	108.349	-2.31998	4.92e-15	1.9e-13	3.11432	FALSE	FALSE	FALSE	FALSE
Pttg1ip2	343.617	-1.09459	9.15e-06	6.6e-05	2.59171	FALSE	FALSE	FALSE	FALSE
1700016D06Rik	221.793	-0.665866	0.0161457	0.0440815	1.23505	FALSE	FALSE	FALSE	FALSE
1700016H13Rik	845.372	0.764681	0.000412156	0.00190865	2.37949	FALSE	FALSE	FALSE	FALSE
1700016K19Rik	500.942	1.18639	8.48e-15	3.19e-13	19.2688	FALSE	FALSE	FALSE	FALSE
1700016L04Rik	15.025	-1.16559	0.0341	0.081951	2.36041	FALSE	FALSE	FALSE	FALSE
1700016P04Rik	301.538	-1.80041	4.94e-14	1.69e-12	3.35803	FALSE	FALSE	FALSE	FALSE
1700017B05Rik	570.706	0.726532	0.000833721	0.0035191	2.23328	TRUE	FALSE	FALSE	FALSE
Ms4a20	612.402	-1.07876	1.94e-06	1.63e-05	2.98213	FALSE	TRUE	FALSE	FALSE
1700017G19Rik	150.767	-1.34133	3.18e-08	4.01e-07	3.45331	FALSE	FALSE	FALSE	FALSE
1700017N19Rik	576.623	-1.0675	0.000176	0.00090738	1.53541	FALSE	FALSE	FALSE	FALSE
1700018B08Rik	488.181	0.711238	0.000297222	0.00142999	2.96611	FALSE	FALSE	FALSE	FALSE
1700018B24Rik	337.776	1.22476	6.46e-07	6.05e-06	3.62351	FALSE	TRUE	FALSE	FALSE
Tex48	585.624	0.576365	0.0123269	0.0350786	1.83565	FALSE	FALSE	FALSE	FALSE
1700018L02Rik	277.014	0.400684	0.0491	0.110024	1.94914	FALSE	FALSE	FALSE	FALSE
1700019A02Rik	323.119	-1.72953	2.99e-09	4.62e-08	2.15411	FALSE	FALSE	FALSE	FALSE
1700019M22Rik	712.457	-1.11397	0.00023836	0.00118152	1.40551	FALSE	FALSE	FALSE	FALSE
1700019N19Rik	1135.97	1.05293	4.96e-10	8.91e-09	4.35916	FALSE	TRUE	FALSE	FALSE
Nscme3l	913.871	0.429154	0.0380548	0.0894131	1.51741	FALSE	FALSE	FALSE	FALSE
Oip5os1	119.061	-1.45652	6.6e-06	4.91e-05	1.88733	TRUE	FALSE	FALSE	FALSE
1700020L24Rik	268.215	0.510786	0.00567331	0.0183806	3.97857	FALSE	FALSE	FALSE	FALSE
1700020N18Rik	280.833	0.760936	0.00924622	0.0275913	1.53595	FALSE	FALSE	FALSE	FALSE
1700021F07Rik	464.455	0.997666	0.000123025	0.000660461	2.42827	TRUE	FALSE	FALSE	FALSE
1700022A21Rik	550.201	0.608697	0.000433017	0.00199054	3.65232	FALSE	FALSE	FALSE	FALSE
1700022A22Rik	66.5448	-1.01032	0.00350458	0.0122046	1.62456	FALSE	FALSE	FALSE	FALSE
1700022E09Rik	11.3313	-2.93227	5.02e-05	0.000297295	3.51075	FALSE	FALSE	FALSE	FALSE
1700022H01Rik	143.467	0.804966	0.00106165	0.00434002	3.40782	FALSE	FALSE	FALSE	FALSE
1700023C21Rik	21.368	-1.62386	0.00200831	0.00756008	2.04299	FALSE	FALSE	FALSE	FALSE
1700023F02Rik	22.4943	-1.2098	0.0203682	0.0533653	1.5985	FALSE	FALSE	FALSE	FALSE
Efcab15	457.241	1.51588	5.03e-13	1.51e-11	5.52078	FALSE	FALSE	FALSE	FALSE
1700024B18Rik	3.59691	-2.36872	0.0332931	0.0803341	2.86219	TRUE	FALSE	FALSE	FALSE
Fyb2	50.8343	-0.950137	0.00566241	0.0183576	2.65333	FALSE	FALSE	FALSE	FALSE
1700025B11Rik	49.6959	-1.82953	4.08e-08	5e-07	6.41336	FALSE	FALSE	FALSE	FALSE
Ms4a19	184.581	-1.35487	2.33e-09	3.67e-08	3.99276	FALSE	FALSE	FALSE	FALSE
1700025M24Rik	67.5009	-1.15004	0.000377955	0.00177149	2.2847	FALSE	FALSE	FALSE	FALSE
1700025N23Rik	22.0083	-1.30866	0.0114	0.0329247	2.81426	FALSE	FALSE	FALSE	FALSE
1700026J14Rik	2.75532	3.91398	0.0266434	0.0667353	1.59255	FALSE	FALSE	FALSE	FALSE
Spaca9	827.342	0.641689	0.00112734	0.00458071	2.55398	FALSE	FALSE	FALSE	FALSE
1700027A15Rik	1023.63	0.628078	0.00728166	0.0226168	1.92477	FALSE	FALSE	FALSE	FALSE
1700027F06Rik	146.627	-0.841671	0.0192398	0.0509295	1.54905	FALSE	FALSE	FALSE	FALSE
1700027F09Rik	39.1964	-1.57036	0.000117238	0.000632572	1.99858	FALSE	FALSE	FALSE	FALSE
1700027I24Rik	18.4163	-1.55837	0.0161249	0.0440379	1.85739	FALSE	FALSE	FALSE	FALSE
1700028E10Rik	35.8029	-0.774761	0.039085	0.0913962	2.32369	FALSE	FALSE	FALSE	FALSE
1700028I16Rik	103.512	0.68627	0.0234161	0.0598425	1.82765	FALSE	FALSE	FALSE	FALSE
1700028J19Rik	1218.21	-0.661128	1.23e-05	8.57e-05	4.10944	FALSE	FALSE	FALSE	FALSE
1700028K03Rik	42.4901	-1.15064	0.00345635	0.0120544	1.85289	FALSE	FALSE	FALSE	FALSE
1700028M03Rik	8.09639	-3.19232	7.15e-05	0.000408062	8.04002	FALSE	FALSE	FALSE	FALSE
1700029H14Rik	1533.71	0.790043	1.67e-07	1.79e-06	6.88256	FALSE	FALSE	FALSE	FALSE
1700029I15Rik	106.651	0.826729	0.00619	0.0197772	2.16396	FALSE	FALSE	FALSE	FALSE
1700029N11Rik	48.5608	-2.18375	6.4e-06	4.78e-05	1.52728	FALSE	FALSE	FALSE	FALSE
1700030C10Rik	25.1083	-3.3178	1.63e-09	2.65e-08	4.1719	FALSE	FALSE	FALSE	FALSE
1700030F04Rik	57.5919	-0.843755	0.0188141	0.0499701	2.20371	FALSE	FALSE	FALSE	FALSE
1700030J22Rik	1099.2	0.590884	2.4e-05	0.000154663	6.01664	FALSE	TRUE	TRUE	FALSE
1700030M09Rik	44.0112	1.08198	0.0124	0.0352274	2.02464	TRUE	FALSE	FALSE	FALSE
1700034E13Rik	516.555	-0.721803	0.0019448	0.00735302	1.65301	FALSE	FALSE	FALSE	FALSE
1700034H15Rik	77.5014	-1.29599	2.99e-07	3.05e-06	22.5254	FALSE	FALSE	FALSE	FALSE
1700034I23Rik	497.853	-1.61694	2.59e-19	1.79e-17	5.93464	TRUE	FALSE	TRUE	FALSE
1700034J05Rik	888.638	-0.847147	1.35e-09	2.22e-08	7.11498	TRUE	TRUE	FALSE	FALSE
1700034P13Rik	13.7937	-1.58265	0.00635371	0.0201938	2.79184	FALSE	FALSE	FALSE	FALSE
1700037C18Rik	492.422	1.02142	3.31e-05	0.000205822	2.65478	FALSE	FALSE	FALSE	FALSE
1700037H04Rik	799.016	0.939319	7.68e-07	7.07e-06	4.34055	FALSE	FALSE	FALSE	FALSE
1700041C23Rik	68.1188	-2.25063	1.2e-11	2.88e-10	3.16192	TRUE	FALSE	FALSE	FALSE
P3r3urf	597.397	1.01056	1.01e-06	9.03e-06	3.61024	FALSE	FALSE	FALSE	FALSE
1700042G15Rik	384.715	-1.1741	1.24e-11	2.94e-10	5.66414	FALSE	FALSE	FALSE	FALSE
1700046C09Rik	42.2815	-1.65877	6.99e-05	0.000399723	1.83484	FALSE	FALSE	FALSE	FALSE
1700047A11Rik	18.7052	-1.61813	0.0019	0.00720766	2.34247	FALSE	FALSE	FALSE	FALSE
1700047E10Rik	8.75028	-2.00438	0.0379549	0.0892706	0.840983	FALSE	FALSE	FALSE	FALSE
1700047G03Rik	73.1288	-1.16381	1.12e-05	7.92e-05	6.79657	TRUE	FALSE	FALSE	FALSE
1700048O20Rik	92.9222	-0.56939	0.0449734	0.102462	1.86438	FALSE	FALSE	FALSE	FALSE
1700049E22Rik	23.2368	1.12869	0.0263028	0.066046	2.73576	FALSE	FALSE	FALSE	FALSE
Zfp974	91.1372	-2.78454	1.39e-20	1.1e-18	7.07338	TRUE	FALSE	TRUE	FALSE
1700049L16Rik	363.828	0.556261	0.0148513	0.0410659	1.6571	FALSE	FALSE	FALSE	FALSE
1700052I22Rik	88.8224	-1.46344	0.000173	0.000894631	1.48624	FALSE	FALSE	FALSE	FALSE
1700052K11Rik	66.9537	0.918422	0.00610154	0.0195428	2.64028	FALSE	FALSE	FALSE	FALSE
1700056E22Rik	182.501	1.10281	5.33e-06	4.06e-05	3.93313	FALSE	FALSE	FALSE	FALSE
1700057G04Rik	191.318	-0.723791	0.00376463	0.0129555	2.4086	FALSE	FALSE	FALSE	FALSE
1700061F12Rik	138.036	-0.88885	0.00248468	0.00907685	1.92115	FALSE	FALSE	FALSE	FALSE
Acsbg3	529.615	0.477367	0.0264	0.0662654	1.75667	FALSE	FALSE	FALSE	FALSE
1700061I17Rik	40.6535	-2.97983	3.76e-12	9.99e-11	2.71962	FALSE	FALSE	FALSE	FALSE
1700061J23Rik	44.5902	-1.06612	0.00549166	0.017873	1.7109	FALSE	FALSE	FALSE	FALSE
1700064M15Rik	194.454	-2.82541	2.6e-35	7.51e-33	8.16002	FALSE	FALSE	FALSE	FALSE
1700065I16Rik	69.1924	1.09895	0.00202102	0.00760004	2.46323	FALSE	FALSE	FALSE	FALSE
1700066M21Rik	142.782	-1.71538	5.98e-10	1.06e-08	4.45323	FALSE	TRUE	FALSE	FALSE
1700066N21Rik	5.31045	-3.04594	0.00536071	0.0175059	2.27546	FALSE	FALSE	FALSE	FALSE
1700067G17Rik	63.553	-1.64983	4.63e-05	0.000276718	2.51932	FALSE	FALSE	FALSE	FALSE
1700067K01Rik	149.078	1.31078	1.76e-07	1.88e-06	5.75028	FALSE	FALSE	FALSE	FALSE
1700067P10Rik	209.993	-0.544165	0.00986267	0.0290963	2.84942	TRUE	FALSE	FALSE	FALSE
1700071M16Rik	103.084	-1.47406	1.39e-06	1.2e-05	2.52242	FALSE	FALSE	FALSE	FALSE
1700072B07Rik	39.6335	2.16599	0.000239	0.00118448	1.4623	FALSE	FALSE	FALSE	FALSE
1700073E17Rik	146.472	-1.22468	0.000259997	0.00127075	1.5925	FALSE	FALSE	FALSE	FALSE
1700074H08Rik	22.2144	-1.48048	0.00792901	0.0242911	1.39486	FALSE	FALSE	FALSE	FALSE
Prss59	1812.61	-1.49214	4.31e-09	6.47e-08	2.16448	TRUE	FALSE	FALSE	FALSE
Nudt16l2	534.883	0.975074	1.89e-07	2.02e-06	4.25152	FALSE	FALSE	FALSE	FALSE
Magea14	112.58	-0.760369	0.00661117	0.0208712	1.70161	FALSE	FALSE	TRUE	FALSE
1700084E18Rik	14.6295	2.12586	0.00573759	0.0185471	2.73446	FALSE	FALSE	FALSE	FALSE
1700084M14Rik	143.871	-1.21698	0.000463	0.00210268	1.40038	FALSE	FALSE	FALSE	FALSE
1700086L19Rik	441.79	0.480162	0.00628598	0.0200206	3.03274	TRUE	FALSE	FALSE	FALSE
1700092C10Rik	51.9165	-1.45891	1.09e-05	7.73e-05	2.94975	FALSE	FALSE	FALSE	FALSE
1700092M07Rik	326.221	0.587558	0.00605823	0.0194178	2.27412	FALSE	FALSE	FALSE	FALSE
1700093K21Rik	741.776	-1.35007	1.29e-06	1.12e-05	1.82837	FALSE	FALSE	FALSE	FALSE
Cfap141	105.317	-1.20173	0.000227972	0.00113842	1.64693	TRUE	FALSE	FALSE	FALSE
1700094M24Rik	35.544	-1.23643	0.00140498	0.00554034	2.67317	FALSE	FALSE	FALSE	FALSE
1700095A21Rik	124.116	-2.03065	7.89e-09	1.12e-07	2.33478	TRUE	FALSE	FALSE	FALSE
1700095J12Rik	48.8553	-0.865319	0.0219341	0.0567389	1.3908	FALSE	FALSE	FALSE	FALSE
1700096K18Rik	35.3131	-0.905649	0.0398236	0.0929439	1.30932	FALSE	FALSE	FALSE	FALSE
1700097N02Rik	35.9848	1.07653	0.00703524	0.021949	4.33848	FALSE	FALSE	FALSE	FALSE
Cfap77	30.9171	1.27137	0.00976	0.0288574	2.766	FALSE	TRUE	FALSE	FALSE
1700102H20Rik	16.665	-1.43886	0.00712	0.0221725	2.33554	TRUE	FALSE	FALSE	FALSE
Spindoc	31.0144	-1.65202	0.000468	0.00212326	1.9061	TRUE	TRUE	TRUE	FALSE
1700108F19Rik	61.3422	-0.780989	0.0496	0.111024	1.04446	FALSE	FALSE	FALSE	FALSE
1700108J01Rik	222.804	-0.569807	0.0161161	0.0440207	1.51432	FALSE	FALSE	FALSE	FALSE
1700109H08Rik	145.4	-2.03861	1.81e-10	3.53e-09	2.31018	TRUE	TRUE	FALSE	FALSE
1700109K24Rik	33.4282	-2.97805	4.95e-11	1.06e-09	5.83786	FALSE	FALSE	FALSE	FALSE
1700112J05Rik	23.1336	-1.40772	0.0171452	0.0464336	1.03894	FALSE	FALSE	FALSE	FALSE
1700112J16Rik	31.2326	-1.02708	0.0114	0.032743	3.45952	FALSE	FALSE	FALSE	FALSE
1700120E14Rik	59.3211	-1.46144	1.71e-05	0.00011467	2.66737	FALSE	FALSE	FALSE	FALSE
1700120G07Rik	35.683	-1.75221	0.000241495	0.00119316	2.44827	FALSE	FALSE	FALSE	FALSE
1700120K04Rik	109.894	0.857226	0.00151203	0.00590352	3.50596	FALSE	FALSE	FALSE	FALSE
1700123L14Rik	1898.36	0.908099	4.56e-12	1.2e-10	11.4458	FALSE	FALSE	FALSE	FALSE
1700123M08Rik	28.0735	-0.956457	0.0342	0.0820054	1.50621	FALSE	FALSE	FALSE	FALSE
1700128A07Rik	42.2009	-1.96728	9.29e-06	6.69e-05	1.79954	FALSE	FALSE	FALSE	FALSE
1700129C05Rik	1207.95	-0.951867	3.93e-06	3.09e-05	2.52307	TRUE	TRUE	TRUE	TRUE
1810013L24Rik	513.719	-1.2536	1.39e-11	3.28e-10	5.65742	FALSE	TRUE	TRUE	FALSE
1810014B01Rik	7.50185	-2.0653	0.0104145	0.030477	2.9381	TRUE	FALSE	FALSE	FALSE
1810024B03Rik	23.3438	-1.75007	0.000762699	0.00325459	1.94449	TRUE	FALSE	FALSE	FALSE
Chaserr	54.9471	-1.04332	0.0025261	0.00920227	2.43924	FALSE	FALSE	FALSE	FALSE
Timm29	87.6138	0.558231	0.0372421	0.0878672	3.01893	TRUE	FALSE	TRUE	FALSE
Cfap410	99.0792	1.413	2.08e-07	2.21e-06	6.53209	FALSE	FALSE	TRUE	FALSE
Ndufaf8	76.776	1.06377	0.0006	0.00264767	3.83879	FALSE	TRUE	TRUE	FALSE
1810053B23Rik	6.47914	-1.99115	0.0260486	0.0655072	2.84847	FALSE	FALSE	FALSE	FALSE
Borcs7	44.588	0.732721	0.0413	0.0957948	2.92762	TRUE	FALSE	TRUE	FALSE
Fam241b	15.61	2.30306	0.00149	0.00581386	2.94421	TRUE	FALSE	FALSE	FALSE
2010315B03Rik	6.45336	-2.47796	0.00646621	0.0204976	1.50625	TRUE	FALSE	FALSE	FALSE
Misp3	22.8249	2.28465	0.00052	0.00232675	3.40864	FALSE	FALSE	FALSE	FALSE
2210016F16Rik	28.2467	1.32048	0.007989	0.0244378	2.98419	FALSE	TRUE	TRUE	FALSE
Zfp995	7.34786	-2.34363	0.00722	0.0224594	3.1937	FALSE	FALSE	FALSE	FALSE
2210408I21Rik	358.888	-1.22018	7.53e-08	8.73e-07	2.80456	TRUE	TRUE	FALSE	FALSE
2210409D07Rik	1.97799	-4.43493	0.0243574	0.0619142	1.37162	FALSE	FALSE	FALSE	FALSE
2300009A05Rik	175.786	-0.645878	0.0122122	0.0348145	1.62653	FALSE	FALSE	FALSE	FALSE
2310011J03Rik	45.8967	2.77053	4.04e-08	4.95e-07	3.62985	TRUE	FALSE	TRUE	FALSE
2310022A10Rik	80.961	1.00254	0.00197	0.00744776	3.02585	TRUE	TRUE	FALSE	FALSE
2310022B05Rik	68.7518	1.41081	2.96e-05	0.000185577	4.59598	FALSE	FALSE	FALSE	FALSE
Relch	145.466	-0.76428	0.000212591	0.00107103	6.65966	TRUE	FALSE	FALSE	FALSE
Trir	169.484	1.19242	4e-08	4.92e-07	9.58102	FALSE	TRUE	FALSE	FALSE
2310039H08Rik	113.497	0.911423	0.00181	0.00690814	2.38876	FALSE	TRUE	FALSE	FALSE
Borcs6	59.0896	2.14014	6.64e-08	7.77e-07	4.45699	FALSE	FALSE	FALSE	FALSE
Micos13	587.936	0.857982	0.000257839	0.00126224	2.02783	FALSE	FALSE	FALSE	FALSE
Riox1	41.9951	1.13237	0.00255	0.00927697	4.62877	FALSE	FALSE	TRUE	FALSE
2410017I17Rik	9.52049	4.69853	0.000339861	0.00160914	14.9225	FALSE	FALSE	FALSE	FALSE
2410021H03Rik	2.09046	-5.51284	0.00805	0.0245716	1.37629	FALSE	FALSE	FALSE	FALSE
Cplane1	576.119	-0.807625	1.78e-05	0.000118817	5.12833	TRUE	FALSE	FALSE	FALSE
Carnmt1	62.091	-1.1847	0.00054	0.00241052	3.06779	TRUE	FALSE	TRUE	FALSE
2510003B16Rik	6.07742	-3.34366	0.0154	0.042337	1.04947	FALSE	FALSE	FALSE	FALSE
2510039O18Rik	126.896	1.60153	3.2e-08	4.04e-07	5.93319	TRUE	FALSE	FALSE	FALSE
2610005L07Rik	9.07966	-1.77308	0.0455	0.103362	1.87275	TRUE	FALSE	FALSE	FALSE
2610008E11Rik	48.9817	-1.93359	3.51e-09	5.35e-08	6.33621	FALSE	FALSE	TRUE	FALSE
Ccdc191	121.211	-1.25865	5.17e-06	3.95e-05	6.41037	FALSE	FALSE	FALSE	FALSE
2610206C17Rik	22.4599	-2.05585	9.91e-06	7.09e-05	8.53746	TRUE	FALSE	FALSE	FALSE
Cfap418	261.518	-1.61738	1.01e-21	9.32e-20	29.2554	TRUE	FALSE	FALSE	FALSE
Zfp979	58.8433	-3.93129	1.02e-27	1.68e-25	12.0269	TRUE	FALSE	FALSE	FALSE
2610318N02Rik	2215.68	1.06775	2.98e-14	1.05e-12	9.70388	FALSE	FALSE	FALSE	FALSE
2610507B11Rik	1890.6	-0.617683	0.00194089	0.00733974	2.26242	TRUE	TRUE	FALSE	FALSE
2610524H06Rik	30.1486	-1.93786	1.14e-05	8.04e-05	6.69844	FALSE	FALSE	FALSE	FALSE
Hpf1	84.3089	-0.865678	0.00264134	0.00956835	2.2899	FALSE	FALSE	FALSE	FALSE
2700046G09Rik	73.2763	1.30014	1.24e-05	8.61e-05	7.23785	FALSE	FALSE	FALSE	FALSE
2700049A03Rik	679.494	-0.913274	6.49e-07	6.07e-06	4.66122	FALSE	FALSE	FALSE	FALSE
Rtraf	357.013	-0.480199	0.0403665	0.0939576	1.20579	FALSE	FALSE	FALSE	FALSE
Selenoh	26.9587	1.8502	0.00177	0.00676932	3.49634	FALSE	FALSE	FALSE	FALSE
2700099C18Rik	39.7446	-1.3133	0.00706	0.0220167	1.19421	TRUE	FALSE	FALSE	FALSE
2810002D19Rik	24.818	-1.58446	0.000217	0.00109083	4.34393	TRUE	FALSE	FALSE	FALSE
2810013P06Rik	21.446	1.16166	0.021913	0.0566922	4.20118	FALSE	FALSE	FALSE	FALSE
2810021J22Rik	47.9194	-1.01603	0.00374	0.0128996	2.60463	TRUE	TRUE	TRUE	FALSE
2810025M15Rik	311.493	1.02461	4.05e-05	0.000246184	3.27371	FALSE	FALSE	FALSE	FALSE
2810032G03Rik	17.85	-2.10778	0.000148	0.000774626	2.23397	FALSE	FALSE	FALSE	FALSE
2810408A11Rik	799.947	0.736952	5.01e-06	3.83e-05	5.08674	FALSE	FALSE	FALSE	FALSE
2810408I11Rik	229.761	-0.562754	0.0185347	0.0494087	1.42752	FALSE	FALSE	FALSE	FALSE
Pclaf	8.86998	-1.51247	0.0393236	0.0918831	3.28053	FALSE	FALSE	FALSE	FALSE
Rex1bd	28.7485	4.38393	2.36e-07	2.46e-06	3.64581	FALSE	FALSE	FALSE	FALSE
2810442N19Rik	2.39931	-3.93581	0.0202566	0.0531333	2.21775	FALSE	FALSE	FALSE	FALSE
2810454H06Rik	13.2875	-1.45108	0.0134855	0.03786	2.63592	FALSE	FALSE	FALSE	FALSE
Resf1	70.9936	-1.27216	7.65e-06	5.61e-05	4.58874	FALSE	FALSE	FALSE	FALSE
2900026A02Rik	18.3452	1.55384	0.0271	0.0677105	1.43405	TRUE	TRUE	TRUE	FALSE
2900060B14Rik	5.07054	-2.03261	0.0329865	0.0797426	1.87699	FALSE	FALSE	FALSE	FALSE
2900092C05Rik	142.307	-1.83837	7.71e-09	1.1e-07	2.47951	FALSE	FALSE	FALSE	FALSE
Bscl2	101.081	-1.0135	8.72e-05	0.000486813	3.0218	FALSE	FALSE	FALSE	FALSE
Mrnip	93.0777	0.557965	0.0263603	0.0661721	4.8963	FALSE	FALSE	FALSE	FALSE
Vxn	20.9077	-1.40194	0.0138158	0.0386155	1.48477	TRUE	FALSE	FALSE	FALSE
Mir100hg	16.0608	-1.46617	0.0325	0.0786652	2.20244	FALSE	FALSE	FALSE	FALSE
C9orf72	90.1234	-0.82631	0.0011213	0.0045582	3.3284	TRUE	FALSE	TRUE	FALSE
Abhd18	49.1341	-1.05017	0.00208656	0.00781417	3.08717	FALSE	FALSE	FALSE	FALSE
3110070M22Rik	173.201	0.642109	0.00211259	0.00790189	4.76019	FALSE	FALSE	FALSE	FALSE
3110082I17Rik	20.3726	1.43112	0.00971182	0.0287446	3.59098	TRUE	FALSE	FALSE	FALSE
3632454L22Rik	14.5635	-3.23433	4.34e-07	4.24e-06	9.92723	FALSE	FALSE	FALSE	FALSE
3830403N18Rik	9.78968	-3.51193	2.54e-05	0.000162338	4.63914	TRUE	TRUE	FALSE	FALSE
3830406C13Rik	272.403	-1.61318	2.26e-15	9.13e-14	4.87056	TRUE	FALSE	TRUE	FALSE
Magea9	43.4195	-1.1225	0.00197	0.00743547	2.74559	FALSE	FALSE	FALSE	FALSE
4632428C04Rik	18.595	-3.63249	2.48e-09	3.9e-08	3.41086	FALSE	FALSE	FALSE	FALSE
4833420G17Rik	108.885	-0.951676	0.000169	0.000877169	2.76506	TRUE	FALSE	FALSE	FALSE
4833439L19Rik	189.747	-0.73694	0.00567256	0.0183806	1.75898	FALSE	FALSE	TRUE	FALSE
Phf8-ps	251.717	-1.48278	3.8e-06	2.99e-05	1.80778	FALSE	FALSE	FALSE	FALSE
4921504E06Rik	142.673	-2.0129	3e-10	5.6e-09	2.32502	FALSE	FALSE	FALSE	FALSE
Ttc6	137.58	0.567996	0.00978	0.0289138	5.09274	FALSE	FALSE	FALSE	FALSE
Alkbh3os1	49.0831	-0.893751	0.00576289	0.0186123	3.50811	FALSE	FALSE	FALSE	FALSE
4921509C19Rik	58.3946	-1.83849	5.71e-10	1.01e-08	10.5951	FALSE	FALSE	FALSE	FALSE
4921511C20Rik	56.1358	-2.87022	2.08e-08	2.74e-07	1.50281	FALSE	FALSE	FALSE	FALSE
Tex47	240.861	-1.44719	4.67e-06	3.59e-05	1.68748	FALSE	FALSE	TRUE	FALSE
4921515E04Rik	22.5326	-0.979157	0.0356339	0.0847887	1.95718	FALSE	FALSE	FALSE	FALSE
4921517D22Rik	132.773	-1.00422	6.13e-06	4.6e-05	6.78728	TRUE	FALSE	FALSE	FALSE
4921518K17Rik	8.68473	-2.43543	0.00363	0.0125669	4.71283	FALSE	FALSE	FALSE	FALSE
4921524J17Rik	75.0385	-0.749613	0.00490695	0.0162435	4.21594	TRUE	FALSE	TRUE	FALSE
4921524L21Rik	131.428	-0.72557	0.00111779	0.00454802	3.93356	FALSE	FALSE	FALSE	FALSE
4921525O09Rik	200.055	-0.848668	9.48e-06	6.81e-05	7.43219	TRUE	FALSE	FALSE	FALSE
Spertl	235.049	-0.766191	3.76e-05	0.000230439	4.25398	FALSE	FALSE	FALSE	FALSE
4921531C22Rik	258.276	-2.09822	2.54e-26	3.64e-24	6.333	TRUE	FALSE	FALSE	FALSE
4921534H16Rik	43.6931	-1.21051	0.00393	0.0134239	1.51682	TRUE	FALSE	FALSE	FALSE
4921536K21Rik	413.334	0.41185	0.0324	0.0786222	1.99472	TRUE	TRUE	FALSE	FALSE
4921539E11Rik	622.326	-2.0721	1.21e-10	2.42e-09	1.87721	TRUE	FALSE	FALSE	FALSE
Clec2m	3919.03	-1.38542	8.3e-07	7.56e-06	1.79262	TRUE	FALSE	TRUE	FALSE
4930402F06Rik	20.9999	-1.32627	0.00642	0.0203857	2.7229	FALSE	FALSE	FALSE	FALSE
4930402F11Rik	11.5975	-1.76196	0.00818	0.024906	3.03682	FALSE	FALSE	FALSE	FALSE
4930402K13Rik	35.3528	-1.2718	0.00542	0.0176679	1.32967	FALSE	FALSE	FALSE	FALSE
4930404A05Rik	15.8249	-1.81234	0.0130382	0.0368088	1.03994	FALSE	FALSE	FALSE	FALSE
4930404N11Rik	370.53	2.35101	1.01e-17	5.47e-16	3.70837	FALSE	FALSE	FALSE	FALSE
4930405A21Rik	9.66264	2.26606	0.00866	0.0261167	3.97923	FALSE	FALSE	FALSE	FALSE
4930405D11Rik	47.9424	-1.52238	0.00847377	0.0256786	0.967969	TRUE	FALSE	FALSE	FALSE
4930405J17Rik	24.4006	-1.63918	0.00268128	0.00969371	1.93555	FALSE	FALSE	FALSE	FALSE
4930406D18Rik	141.376	-0.807869	0.0146668	0.0406362	1.23996	FALSE	FALSE	FALSE	FALSE
4930407I10Rik	1246.85	-0.782784	0.00144	0.00565092	2.62185	FALSE	FALSE	FALSE	FALSE
4930413F20Rik	40.5951	0.90557	0.0428846	0.0986308	1.65786	FALSE	FALSE	FALSE	FALSE
4930414N06Rik	74.0469	-1.50412	3.97e-08	4.9e-07	5.77772	FALSE	FALSE	FALSE	FALSE
Spata48	164.649	-0.808057	0.00968341	0.0286839	1.24872	FALSE	FALSE	FALSE	FALSE
4930423M02Rik	31.8423	-1.05544	0.0114871	0.033046	3.06959	TRUE	FALSE	FALSE	FALSE
4930428D20Rik	79.6195	-0.773903	0.0273784	0.0682374	1.3883	FALSE	FALSE	FALSE	FALSE
4930428G15Rik	1.27172	-4.82403	0.0416607	0.0963036	1.62952	FALSE	FALSE	FALSE	FALSE
4930429F11Rik	17.3453	-1.78067	0.00989	0.0291551	1.35166	FALSE	FALSE	FALSE	FALSE
4930429F24Rik	31.9562	-1.77518	1.39e-05	9.55e-05	3.70049	FALSE	FALSE	FALSE	FALSE
Potefam1	536.052	-1.9054	2.02e-12	5.51e-11	2.53182	FALSE	FALSE	FALSE	FALSE
4930430F08Rik	109.565	-0.724147	0.0271	0.0677259	1.12005	TRUE	TRUE	TRUE	FALSE
4930431F12Rik	21.6906	-2.04222	0.000142109	0.000749404	2.79843	FALSE	FALSE	FALSE	FALSE
4930431P03Rik	34.4067	-2.50536	6.43e-10	1.13e-08	3.94125	FALSE	FALSE	FALSE	FALSE
Brme1	303.066	0.688295	0.000456	0.00207513	4.16671	FALSE	FALSE	FALSE	FALSE
4930433N12Rik	675.819	-4.44937	5.48e-91	1.11e-87	15.6763	FALSE	FALSE	FALSE	FALSE
4930434J06Rik	32.0093	-1.5694	0.000199	0.00101252	3.80848	TRUE	FALSE	FALSE	FALSE
4930440C22Rik	29.685	-3.13498	4e-08	4.92e-07	1.8983	TRUE	FALSE	FALSE	FALSE
4930440I19Rik	38.2183	-1.70717	4.12e-05	0.000250117	2.35134	FALSE	FALSE	FALSE	FALSE
4930441J16Rik	28.7724	-1.09719	0.0189669	0.0503155	1.4343	FALSE	FALSE	FALSE	FALSE
4930442J19Rik	61.2245	-2.42462	8.45e-12	2.07e-10	3.41247	TRUE	FALSE	FALSE	FALSE
4930444F02Rik	447.011	-1.62779	1.24e-20	9.88e-19	7.63252	FALSE	FALSE	FALSE	FALSE
Semp2l2b	75.3584	-2.30523	8.25e-13	2.39e-11	3.34149	FALSE	FALSE	FALSE	FALSE
4930444M15Rik	25.4378	-1.71158	0.00118	0.00474863	1.77219	FALSE	FALSE	FALSE	FALSE
4930447C04Rik	59.1733	-3.01819	9.93e-18	5.4e-16	4.91638	TRUE	TRUE	FALSE	FALSE
4930447J18Rik	7.74751	-1.7745	0.0316	0.0768622	1.86656	FALSE	FALSE	FALSE	FALSE
4930448I06Rik	6.19006	-2.27769	0.0186968	0.0497603	1.55036	FALSE	FALSE	FALSE	FALSE
4930449E01Rik	29.6472	-0.927448	0.0175841	0.047368	7.39826	FALSE	FALSE	FALSE	FALSE
4930449I24Rik	5.0321	-2.68139	0.0307434	0.0752208	0.894664	FALSE	FALSE	FALSE	FALSE
Dnaaf8	486.643	1.64702	8.53e-21	6.89e-19	12.4222	TRUE	FALSE	FALSE	FALSE
4930451I11Rik	73.5741	1.21127	0.000268023	0.00130296	3.0316	FALSE	FALSE	TRUE	FALSE
4930452G13Rik	131.311	-1.09267	0.000128275	0.000683998	2.19929	FALSE	FALSE	FALSE	FALSE
4930453L07Rik	29.7164	-1.81059	3.54e-05	0.000218255	2.52644	FALSE	FALSE	FALSE	FALSE
4930455B14Rik	113.472	-1.04459	0.00128	0.00511596	1.47605	TRUE	FALSE	FALSE	FALSE
4930455D15Rik	8.90665	-2.19635	0.00617244	0.0197316	1.70817	FALSE	FALSE	FALSE	FALSE
4930456L15Rik	8.35522	-3.33577	0.00128212	0.00511243	1.42892	FALSE	FALSE	FALSE	FALSE
4930465K10Rik	127.849	1.11365	0.000165112	0.000857271	3.12769	FALSE	FALSE	FALSE	FALSE
4930467D21Rik	28.2645	-1.92094	0.00111	0.00450715	1.32614	TRUE	FALSE	FALSE	FALSE
Potefam3e	5.05667	-4.85017	0.0004383	0.00201025	2.91962	FALSE	FALSE	FALSE	FALSE
Tex50	316.116	-1.01037	0.000592735	0.00261809	1.50335	FALSE	FALSE	FALSE	FALSE
4930470H14Rik	3.92528	-2.41439	0.0456	0.103566	2.36289	FALSE	FALSE	FALSE	FALSE
4930470O06Rik	9.09473	-2.12293	0.00389	0.0133264	2.45398	FALSE	FALSE	FALSE	FALSE
4930471M09Rik	18.953	-1.19899	0.0319	0.0775434	1.78292	FALSE	FALSE	FALSE	FALSE
4930473O22Rik	45.9844	-2.03874	3.77e-07	3.75e-06	2.16362	FALSE	FALSE	FALSE	FALSE
4930474N05Rik	68.6227	-1.90986	6.61e-09	9.56e-08	3.83032	FALSE	FALSE	FALSE	FALSE
4930474N09Rik	62.8788	-0.847519	0.0222	0.057303	1.67808	FALSE	FALSE	FALSE	FALSE
4930478P22Rik	49.5411	-0.968097	0.00297	0.0105882	3.80599	TRUE	FALSE	FALSE	FALSE
4930479D17Rik	55.7036	-1.90277	7.01e-07	6.5e-06	2.86289	FALSE	FALSE	FALSE	FALSE
4930480E11Rik	22.5948	-2.97204	1.63e-08	2.2e-07	4.7862	FALSE	FALSE	FALSE	FALSE
4930480G23Rik	17.9867	-1.63229	0.00522335	0.0171163	1.85982	FALSE	FALSE	FALSE	FALSE
4930482G09Rik	44.2662	-0.978191	0.00930759	0.027738	1.97152	FALSE	FALSE	FALSE	FALSE
4930483J18Rik	44.8364	0.956344	0.0168067	0.0456461	2.21261	FALSE	FALSE	FALSE	FALSE
4930484H19Rik	23.9611	-2.24707	3.99e-07	3.93e-06	12.1015	FALSE	FALSE	FALSE	FALSE
4930486I03Rik	42.6967	-0.876435	0.0272302	0.0679613	1.32699	FALSE	FALSE	FALSE	FALSE
4930488L21Rik	316.941	0.725567	6.19e-05	0.000358135	5.69715	FALSE	FALSE	FALSE	FALSE
4930503E14Rik	39.8449	-1.85012	9.16e-05	0.000507512	1.62801	TRUE	TRUE	FALSE	FALSE
4930503L19Rik	428.479	-0.794665	4.38e-05	0.00026455	3.62896	TRUE	TRUE	TRUE	FALSE
Lypd9	158.174	0.830766	0.0079	0.0242286	1.98726	FALSE	FALSE	FALSE	FALSE
4930505A04Rik	357.779	-0.749844	0.000763	0.00325655	2.06141	FALSE	FALSE	FALSE	FALSE
4930507D10Rik	48.704	-0.822672	0.0328668	0.0794744	1.32256	FALSE	FALSE	FALSE	FALSE
4930509E16Rik	6.94696	-2.55741	0.00886116	0.0266216	1.98338	FALSE	FALSE	FALSE	FALSE
4930509J09Rik	7.93724	-1.87394	0.0134997	0.0378938	3.99814	FALSE	FALSE	FALSE	FALSE
4930511A02Rik	47.8199	-1.81608	9.02e-07	8.15e-06	3.92836	TRUE	FALSE	FALSE	FALSE
4930511M06Rik	83.6573	-1.14361	0.000821	0.00347373	2.69712	FALSE	FALSE	FALSE	FALSE
4930513D17Rik	60.2223	-2.45769	2.42e-07	2.52e-06	1.62131	FALSE	FALSE	FALSE	FALSE
4930513O06Rik	21.8704	-1.52353	0.00654	0.0206829	1.41372	FALSE	FALSE	FALSE	FALSE
4930515L03Rik	1.40288	-4.9346	0.0364	0.0862617	1.20334	FALSE	FALSE	FALSE	FALSE
4930515L19Rik	21.2126	-3.18969	2.05e-08	2.72e-07	4.00116	FALSE	FALSE	FALSE	FALSE
4930518J21Rik	6.71452	-1.88846	0.0178	0.0478802	4.25598	FALSE	FALSE	FALSE	FALSE
4930519D14Rik	42.2362	-1.68087	9.06e-06	6.54e-05	3.01181	FALSE	FALSE	FALSE	FALSE
4930519F16Rik	15.505	-1.09795	0.0383	0.0897995	3.28042	TRUE	FALSE	FALSE	FALSE
4930519F24Rik	12.1345	-2.43479	0.000594	0.00262255	1.65569	FALSE	FALSE	FALSE	FALSE
4930519G04Rik	245.382	-1.62272	1.19e-11	2.85e-10	3.76062	FALSE	FALSE	TRUE	FALSE
4930522H14Rik	174.508	-1.4881	2.71e-06	2.21e-05	2.10894	FALSE	FALSE	FALSE	FALSE
4930522O17Rik	62.3667	-2.1349	7.59e-10	1.31e-08	3.88466	FALSE	FALSE	FALSE	FALSE
4930523C07Rik	82.6547	-0.976574	0.000373	0.00175071	3.1828	TRUE	TRUE	TRUE	FALSE
4930523O13Rik	107.737	-2.34129	5.38e-15	2.07e-13	3.0814	FALSE	FALSE	FALSE	FALSE
4930524B17Rik	6.89383	-3.36451	0.00415435	0.0140665	1.23635	FALSE	FALSE	FALSE	FALSE
4930524C18Rik	6.42617	-2.08359	0.0139	0.0388542	4.46917	FALSE	FALSE	FALSE	FALSE
Samt2b	20.1924	-1.48666	0.00672	0.021165	1.41828	FALSE	FALSE	FALSE	FALSE
4930524O08Rik	19.6052	-1.0756	0.0401	0.0934626	2.83298	TRUE	FALSE	FALSE	FALSE
4930525D18Rik	142.183	-1.4226	2.3e-08	3e-07	7.8057	FALSE	FALSE	FALSE	FALSE
4930525G20Rik	150.057	-1.6403	2.87e-11	6.4e-10	3.69807	FALSE	FALSE	FALSE	FALSE
4930526I15Rik	54.4808	1.68184	3.79e-05	0.000232469	4.08456	FALSE	FALSE	FALSE	FALSE
4930528A17Rik	31.4562	-1.22994	0.00244445	0.0089533	2.23429	FALSE	FALSE	FALSE	FALSE
4930528G23Rik	2.98107	-4.0481	0.0226	0.0580401	1.12187	FALSE	FALSE	FALSE	FALSE
4930528H21Rik	13.0768	-1.53361	0.00966	0.0286214	2.45995	FALSE	FALSE	FALSE	FALSE
4930529C04Rik	16.4606	-2.71266	7.39e-07	6.82e-06	6.86098	FALSE	FALSE	FALSE	FALSE
4930532I03Rik	29.2297	-2.18931	9.25e-07	8.33e-06	3.1911	FALSE	FALSE	FALSE	FALSE
4930532M18Rik	8.2001	-2.94552	0.00934	0.0278095	0.998855	TRUE	FALSE	FALSE	FALSE
4930533B01Rik	32.4739	-2.30776	2.67e-09	4.16e-08	11.6515	FALSE	FALSE	FALSE	FALSE
4930533N22Rik	12.4202	-2.76345	0.000123477	0.000661795	2.48608	FALSE	FALSE	FALSE	FALSE
Tmem269	339.97	-0.584017	0.00023666	0.0011747	10.3334	TRUE	TRUE	FALSE	TRUE
4930539J05Rik	71.3547	-0.653596	0.030503	0.0747534	2.05408	FALSE	FALSE	FALSE	FALSE
4930542D17Rik	1.57766	-5.13694	0.0205	0.0536386	1.5712	FALSE	FALSE	FALSE	FALSE
4930543N07Rik	23.8223	-0.974223	0.0342	0.0821544	1.79551	FALSE	FALSE	FALSE	FALSE
4930544D05Rik	546.392	1.10503	1.73e-09	2.79e-08	4.62854	TRUE	FALSE	FALSE	FALSE
4930544G11Rik	845.167	-0.67603	0.000970015	0.00402335	2.30151	FALSE	FALSE	TRUE	FALSE
4930545E07Rik	10.576	-1.56322	0.01525	0.0419768	3.91257	FALSE	FALSE	FALSE	FALSE
4930545H06Rik	21.5514	-1.21819	0.0149464	0.0412536	1.60421	FALSE	FALSE	FALSE	FALSE
4930545L23Rik	68.2934	-1.38494	3.86e-06	3.04e-05	7.8192	FALSE	FALSE	FALSE	FALSE
4930546C10Rik	5.57593	-3.44487	0.00194	0.00733179	1.67642	FALSE	FALSE	FALSE	FALSE
4930547E14Rik	36.8948	-2.09268	2.3e-07	2.41e-06	3.10649	TRUE	FALSE	FALSE	FALSE
4930548G14Rik	14.5307	-1.5206	0.0325	0.0786924	1.77921	FALSE	FALSE	FALSE	FALSE
4930548H24Rik	48.8264	-1.15658	0.00970088	0.0287216	1.23739	FALSE	FALSE	FALSE	FALSE
4930548J01Rik	40.9023	-1.01285	0.0185503	0.0494358	1.38176	FALSE	FALSE	FALSE	FALSE
Tex46	92.4061	1.78228	9.89e-08	1.12e-06	4.35782	FALSE	FALSE	FALSE	FALSE
4930550C14Rik	176.545	-1.02668	0.00313	0.0110811	1.24031	FALSE	FALSE	TRUE	FALSE
Magea13	115.22	-1.20316	4.79e-06	3.68e-05	3.16414	FALSE	FALSE	FALSE	FALSE
4930553C11Rik	68.3566	-0.797176	0.0116876	0.0335062	1.73812	FALSE	FALSE	FALSE	FALSE
4930553E22Rik	20.7365	-2.199	0.000238341	0.00118152	1.42641	FALSE	FALSE	FALSE	FALSE
4930554G24Rik	16.9698	-2.24706	4.78e-05	0.000284525	4.73221	FALSE	FALSE	FALSE	FALSE
4930554I06Rik	33.7179	-1.42974	0.023394	0.0598084	1.05176	TRUE	FALSE	FALSE	FALSE
4930555B11Rik	11.2256	-1.92877	0.0129	0.0364893	1.26153	FALSE	FALSE	FALSE	FALSE
4930556C24Rik	25.0341	-1.06727	0.0447814	0.102101	1.10185	FALSE	FALSE	FALSE	FALSE
4930556N09Rik	23.7904	-1.23811	0.0258	0.0650107	2.14371	FALSE	FALSE	FALSE	FALSE
H2al3	163.101	-0.951457	0.00553927	0.0180086	1.16889	FALSE	FALSE	FALSE	FALSE
4930558C23Rik	356.415	-1.7759	4.72e-16	2.11e-14	3.77925	FALSE	FALSE	FALSE	FALSE
4930558F17Rik	27.2079	-1.47564	0.000819294	0.00346949	2.94865	FALSE	FALSE	FALSE	FALSE
4930558J18Rik	74.8572	-1.07533	0.000222678	0.00111551	2.72756	FALSE	FALSE	FALSE	FALSE
4930558K02Rik	66.2967	-0.802652	0.0331	0.079892	1.10017	FALSE	FALSE	FALSE	FALSE
4930562C15Rik	371.094	-0.471039	0.00952985	0.0282752	2.23515	FALSE	FALSE	FALSE	FALSE
4930562F07Rik	5.51834	-4.43586	0.00015998	0.000832769	17.861	FALSE	FALSE	FALSE	FALSE
4930563E22Rik	17.9809	-1.44801	0.00567394	0.0183806	3.73894	TRUE	FALSE	TRUE	FALSE
4930563M20Rik	7.70487	-2.06541	0.0102	0.0300072	2.67738	FALSE	FALSE	FALSE	FALSE
4930563M21Rik	117.89	-3.02793	6.01e-26	8.34e-24	5.49137	FALSE	FALSE	FALSE	FALSE
4930564C03Rik	149.913	-0.688706	0.0188235	0.0499877	1.2427	FALSE	FALSE	FALSE	FALSE
4930565N06Rik	43.0229	-3.80127	1.57e-18	9.68e-17	4.19634	FALSE	FALSE	FALSE	FALSE
4930567J20Rik	20.377	-1.78783	0.0007	0.00302541	4.13225	FALSE	FALSE	FALSE	FALSE
4930567K12Rik	9.06392	-2.28899	0.00615685	0.0196922	3.0226	FALSE	FALSE	FALSE	FALSE
4930567K20Rik	135.78	-0.866687	0.00578	0.018657	1.34316	FALSE	FALSE	FALSE	FALSE
4930568D16Rik	42.075	-1.94273	6.17e-06	4.62e-05	2.17142	FALSE	TRUE	FALSE	TRUE
4930568G15Rik	8.93378	-3.10154	8.47e-05	0.000474469	6.84948	FALSE	FALSE	FALSE	FALSE
4930578E11Rik	38.0256	-0.987042	0.00766	0.0236038	2.77073	FALSE	FALSE	FALSE	FALSE
4930578I06Rik	419.372	0.759112	8.66e-06	6.28e-05	5.75181	FALSE	FALSE	FALSE	FALSE
4930579F01Rik	249.425	-0.849508	0.00804	0.024547	1.25849	FALSE	FALSE	FALSE	FALSE
4930579G24Rik	116.385	0.63794	0.0183	0.0489188	2.261	FALSE	FALSE	FALSE	FALSE
4930579H20Rik	5.32453	-2.68322	0.0204	0.0534274	1.74008	FALSE	FALSE	FALSE	FALSE
4930581F22Rik	45.6712	-0.853856	0.011	0.0318533	2.53639	TRUE	FALSE	FALSE	FALSE
4930583K01Rik	28.8916	-0.918529	0.0304	0.0745012	2.59241	FALSE	FALSE	FALSE	FALSE
4930583P06Rik	26.0673	-1.8897	0.000900759	0.00376445	1.43106	FALSE	FALSE	FALSE	FALSE
4930584F24Rik	260.289	-1.22349	1.75e-05	0.000116964	2.63089	FALSE	FALSE	FALSE	FALSE
4930587E11Rik	13.2318	-1.66862	0.0115	0.0330333	2.76178	FALSE	FALSE	FALSE	FALSE
4930594C11Rik	50.1956	-1.81054	9.19e-08	1.05e-06	3.87868	FALSE	FALSE	FALSE	FALSE
4930595M18Rik	54.7956	-2.34304	2.99e-07	3.05e-06	1.94535	FALSE	FALSE	FALSE	FALSE
4930596D02Rik	148.628	-0.563729	0.032603	0.0789206	1.41477	TRUE	TRUE	TRUE	TRUE
4930596I21Rik	8.50925	-2.6189	0.000659	0.00287083	5.094	FALSE	FALSE	FALSE	FALSE
4930597G03Rik	7.61175	-2.34159	0.00749	0.0231847	3.15344	FALSE	FALSE	FALSE	FALSE
4931403G20Rik	98.6996	-0.835781	0.00875	0.0263332	1.57424	FALSE	FALSE	FALSE	FALSE
4931406C07Rik	80.7683	0.786466	0.00371	0.0127967	6.09902	TRUE	FALSE	TRUE	FALSE
4931408C20Rik	246.381	-1.37776	1.63e-10	3.19e-09	7.43935	FALSE	FALSE	FALSE	FALSE
4931408D14Rik	252.959	-0.852644	6.69e-05	0.000384284	2.85929	FALSE	FALSE	FALSE	FALSE
Iqca1l	284.602	-1.04787	3.84e-08	4.75e-07	5.19805	FALSE	FALSE	FALSE	FALSE
Jkampl	276.648	-0.938967	4.42e-07	4.31e-06	6.90753	TRUE	FALSE	FALSE	FALSE
4931419H13Rik	47.9388	0.846206	0.0277	0.068856	2.05877	FALSE	FALSE	FALSE	FALSE
Potegl	163.785	-1.5665	1.72e-08	2.31e-07	2.67694	FALSE	FALSE	TRUE	FALSE
4931428L18Rik	30.6619	-0.80749	0.0469836	0.106137	1.75365	TRUE	TRUE	FALSE	FALSE
4931429L15Rik	300.75	0.446138	0.0171	0.0463507	2.78109	FALSE	FALSE	FALSE	FALSE
4931430N09Rik	36.0078	-1.90378	1.29e-05	8.94e-05	2.36748	FALSE	FALSE	FALSE	FALSE
Fem1al	188.537	0.848266	4.56e-05	0.000273629	5.60474	FALSE	FALSE	TRUE	FALSE
4931440J10Rik	36.0065	-0.793793	0.0356	0.0847068	3.62202	FALSE	FALSE	FALSE	FALSE
Dmtf1l	71.6166	-3.28815	2.86e-24	3.29e-22	5.39973	TRUE	FALSE	FALSE	FALSE
4932413F04Rik	62.3727	-0.986426	0.00393	0.0134427	2.78527	FALSE	FALSE	FALSE	FALSE
4932414J04Rik	10.4874	-2.5038	0.000697	0.00301366	2.00839	FALSE	FALSE	FALSE	FALSE
4932414N04Rik	739.794	-1.43017	4.6e-07	4.46e-06	2.11606	FALSE	FALSE	FALSE	FALSE
4932415M13Rik	70.5191	-2.10431	1.1e-11	2.65e-10	6.42699	TRUE	FALSE	FALSE	FALSE
Stk35os1	213.307	0.522895	0.0336	0.0809945	1.93426	FALSE	FALSE	FALSE	FALSE
4932416K20Rik	35.9191	-1.65023	0.000345183	0.00163178	1.91934	FALSE	FALSE	FALSE	FALSE
4932429P05Rik	69.673	-2.99799	4.04e-13	1.23e-11	2.54688	FALSE	FALSE	FALSE	FALSE
4932435O22Rik	22.5694	-2.47452	4.57e-07	4.43e-06	3.39452	FALSE	FALSE	FALSE	FALSE
4932438A13Rik	2450.53	-1.49138	5.01e-14	1.71e-12	4.85446	TRUE	TRUE	FALSE	TRUE
4933400A11Rik	127.693	-1.58489	4.1e-07	4.03e-06	2.21063	FALSE	FALSE	FALSE	FALSE
4933400C23Rik	2.92882	-6.02065	0.000332999	0.00158036	5.42528	FALSE	FALSE	FALSE	FALSE
4933400F21Rik	144.372	-1.44493	1.96e-10	3.79e-09	4.56684	FALSE	FALSE	FALSE	FALSE
4933400L20Rik	40.2319	-0.808882	0.0208304	0.0543402	3.15254	TRUE	FALSE	FALSE	FALSE
4933401H06Rik	105.482	-2.5879	5.93e-12	1.51e-10	2.73201	FALSE	FALSE	FALSE	FALSE
4933402C06Rik	38.9859	-1.24979	0.00152	0.00594478	1.89311	FALSE	FALSE	FALSE	FALSE
4933402D24Rik	31.1374	-1.29389	0.0075	0.0231977	1.73105	FALSE	TRUE	FALSE	FALSE
4933402J10Rik	246.805	-1.2669	4.96e-05	0.000294043	1.63353	FALSE	FALSE	FALSE	FALSE
4933402N22Rik	21.228	-1.59525	0.00184	0.00700461	1.88426	TRUE	FALSE	FALSE	FALSE
Spem2	1728.1	0.678843	5.65e-05	0.000331416	3.67446	FALSE	FALSE	FALSE	FALSE
4933403O08Rik	19.6204	-1.31114	0.00895	0.0268544	3.32678	TRUE	TRUE	FALSE	FALSE
4933404G15Rik	237.288	-1.50856	8.07e-08	9.32e-07	2.45242	FALSE	FALSE	FALSE	FALSE
4933404O12Rik	583.737	-1.41585	5.06e-15	1.95e-13	10.6309	TRUE	FALSE	FALSE	FALSE
4933405E24Rik	12.3434	-1.8311	0.00191	0.00723761	7.53468	FALSE	FALSE	FALSE	FALSE
4933405L10Rik	176.273	1.02683	0.00139	0.00548657	2.21387	FALSE	FALSE	TRUE	FALSE
4933405O20Rik	250.091	-0.85043	0.0323	0.0783072	0.888016	FALSE	FALSE	FALSE	FALSE
4933406C10Rik	55.1609	-1.31986	7.47e-05	0.000424162	3.23776	FALSE	FALSE	FALSE	FALSE
4933406D12Rik	3.82942	-2.44952	0.0384	0.0899943	3.34153	FALSE	FALSE	FALSE	FALSE
4933406F09Rik	31.0121	-2.37871	1.85e-06	1.56e-05	2.27768	FALSE	FALSE	FALSE	FALSE
Terb2	25.7924	-2.23308	4.42e-06	3.42e-05	2.3269	TRUE	FALSE	TRUE	FALSE
4933406J10Rik	21.1448	-1.65444	0.00131646	0.00523673	4.01686	FALSE	FALSE	FALSE	FALSE
4933406K04Rik	121.358	-0.686359	0.0127638	0.0361185	1.78365	FALSE	FALSE	FALSE	FALSE
Mgat4f	228.092	-1.17865	1.46e-07	1.59e-06	3.39362	FALSE	FALSE	FALSE	FALSE
4933407E24Rik	19.476	1.42008	0.0107183	0.0311801	3.73525	FALSE	FALSE	FALSE	FALSE
4933409G03Rik	434.767	-0.623165	0.00298	0.0106131	1.86525	FALSE	FALSE	FALSE	FALSE
4933409K07Rik	30.933	-1.62989	8.76e-05	0.000487964	3.69296	TRUE	FALSE	FALSE	FALSE
4933411G06Rik	90.4416	-1.11866	0.000238339	0.00118152	2.07212	FALSE	FALSE	FALSE	FALSE
4933411K16Rik	3934.53	0.481358	0.000653	0.00285188	3.93189	TRUE	TRUE	TRUE	FALSE
4933412E12Rik	66.8956	1.09591	0.00251	0.00916497	3.03836	TRUE	FALSE	FALSE	FALSE
4933413J09Rik	13.6872	-2.11192	0.0102889	0.0301627	3.83116	FALSE	FALSE	FALSE	FALSE
4933413L06Rik	13.5207	-1.28845	0.0338	0.0813927	1.62787	FALSE	FALSE	FALSE	FALSE
Taf7l2	614.162	-0.717582	1.4e-06	1.21e-05	5.58055	FALSE	TRUE	TRUE	FALSE
4933416E03Rik	9.31721	-2.36445	0.003	0.010679	1.88961	FALSE	FALSE	FALSE	FALSE
4933417A18Rik	348.962	-0.919292	0.00270418	0.00976483	1.33687	FALSE	FALSE	FALSE	FALSE
4933417D19Rik	108.57	0.801183	0.0075566	0.0233336	2.09313	FALSE	FALSE	FALSE	FALSE
4933421I07Rik	56.8645	-1.26537	0.000275	0.00133451	2.08623	FALSE	FALSE	FALSE	FALSE
4933421O10Rik	195.097	1.45685	1.89e-10	3.67e-09	6.90048	FALSE	FALSE	FALSE	FALSE
4933422A05Rik	37.2163	-0.858847	0.0248	0.0629001	1.96351	FALSE	FALSE	FALSE	FALSE
4933424G05Rik	6.08172	-1.72649	0.0492	0.110286	1.66288	FALSE	FALSE	FALSE	FALSE
Nt5el	45.7955	-0.856429	0.0219	0.0566494	1.4728	TRUE	TRUE	FALSE	FALSE
Mfsd13b	457.836	-1.00841	7.18e-12	1.79e-10	22.8478	FALSE	FALSE	FALSE	FALSE
4933428C19Rik	4.38361	-2.48367	0.0397	0.0927221	1.62294	FALSE	FALSE	FALSE	FALSE
4933429O19Rik	53.1768	-1.78971	9.48e-08	1.08e-06	5.69774	TRUE	FALSE	FALSE	FALSE
4933430H16Rik	21.0059	-2.05441	4.35e-05	0.000263055	3.27218	FALSE	FALSE	FALSE	FALSE
4933430I17Rik	82.0161	-0.535361	0.0369	0.0872848	5.19215	TRUE	FALSE	FALSE	FALSE
4933431G14Rik	62.7867	-0.710281	0.023	0.0589341	1.91893	FALSE	FALSE	FALSE	FALSE
4933433G19Rik	10.4514	-2.13602	0.0113	0.032641	1.5737	FALSE	FALSE	FALSE	FALSE
4933433H22Rik	34.3814	-1.90522	6e-05	0.000349315	3.6	FALSE	FALSE	FALSE	FALSE
4933434E20Rik	243.037	-0.573029	0.0014	0.00552507	4.84647	FALSE	FALSE	FALSE	FALSE
4933436H12Rik	34.2468	-2.39361	1.34e-07	1.47e-06	3.67199	FALSE	FALSE	FALSE	FALSE
4933436I01Rik	102.056	-2.20146	1.03e-09	1.74e-08	2.04453	FALSE	FALSE	FALSE	FALSE
4933438K21Rik	18.835	-1.27438	0.0218745	0.0566376	2.58925	FALSE	FALSE	FALSE	FALSE
4933440M02Rik	287.413	-1.30887	5.55e-14	1.88e-12	18.5709	FALSE	FALSE	FALSE	FALSE
5031410I06Rik	3.6616	-2.87261	0.0424	0.0977362	1.28312	TRUE	TRUE	TRUE	FALSE
5031426D15Rik	11.1077	-3.83498	8.76e-07	7.94e-06	3.14163	FALSE	FALSE	FALSE	FALSE
5031439G07Rik	470.942	1.17903	4.07e-13	1.23e-11	12.8715	TRUE	FALSE	TRUE	FALSE
5033403F01Rik	13.1656	-1.76834	0.0065	0.0205818	2.51979	FALSE	FALSE	FALSE	FALSE
5430416N02Rik	17.7308	-1.03543	0.0439	0.100457	2.25412	FALSE	FALSE	FALSE	FALSE
5430427M07Rik	3.83609	-5.4346	0.001	0.00413529	1.33834	TRUE	FALSE	FALSE	FALSE
5730409E04Rik	11.24	2.93036	0.00172	0.00662148	3.22589	FALSE	FALSE	TRUE	FALSE
5730480H06Rik	11.096	-1.52548	0.0283	0.0701924	2.63968	TRUE	FALSE	FALSE	FALSE
Fam241a	76.6411	-0.859376	0.00175	0.00670996	3.00064	FALSE	FALSE	FALSE	FALSE
Inava	88.0684	0.783102	0.00527151	0.0172523	3.53907	FALSE	FALSE	FALSE	FALSE
5830417I10Rik	99.7973	-0.702719	0.0173	0.0466628	2.0055	FALSE	FALSE	FALSE	FALSE
6330415B21Rik	2.963	-3.21698	0.0296307	0.0729603	2.3806	FALSE	FALSE	FALSE	FALSE
Spef1l	235.832	0.909652	0.000115761	0.000625716	3.47967	FALSE	FALSE	FALSE	FALSE
6430548M08Rik	81.8051	0.788574	0.00405	0.0137826	5.00055	FALSE	TRUE	FALSE	FALSE
6430571L13Rik	7.19674	-2.06293	0.0345	0.0826211	1.04441	TRUE	TRUE	TRUE	FALSE
6530403H02Rik	2.91185	3.99035	0.0136971	0.038353	3.48337	FALSE	FALSE	FALSE	FALSE
6530411M01Rik	2.84373	-3.41984	0.0155918	0.0427428	3.42685	FALSE	FALSE	FALSE	FALSE
6720468P15Rik	17.2418	-1.80871	0.00151	0.00589157	4.42332	TRUE	FALSE	FALSE	FALSE
6720489N17Rik	3.31536	-2.98896	0.0407327	0.0947248	1.41796	FALSE	FALSE	TRUE	FALSE
6820431F20Rik	31.2608	-3.66337	2.05e-14	7.38e-13	5.48234	FALSE	FALSE	FALSE	FALSE
9030404E10Rik	15.9178	-4.3443	9.37e-10	1.59e-08	4.42141	FALSE	FALSE	FALSE	FALSE
9030612E09Rik	2.92552	-3.34851	0.017833	0.0479266	2.83484	FALSE	TRUE	FALSE	FALSE
Armh3	47.6134	0.944691	0.0074989	0.0231964	3.84567	TRUE	FALSE	FALSE	FALSE
S100a7l2	7.72565	-2.1144	0.0309525	0.07559	0.896685	FALSE	FALSE	FALSE	FALSE
9230105E05Rik	7.52305	-1.52079	0.0478	0.107676	2.4346	FALSE	FALSE	FALSE	FALSE
Cfap300	224.124	-0.794243	6.07e-05	0.000352152	4.24995	TRUE	TRUE	TRUE	FALSE
9330020H09Rik	21.7045	1.58782	0.00722	0.022451	2.62728	TRUE	FALSE	FALSE	FALSE
9330102E08Rik	537.2	-1.38624	1.74e-10	3.4e-09	4.18137	FALSE	FALSE	FALSE	FALSE
9330117O12Rik	11.3612	-4.00916	2.25e-07	2.37e-06	4.96548	FALSE	FALSE	FALSE	FALSE
9430015G10Rik	155.007	-0.839971	0.000497	0.00223931	3.01307	TRUE	TRUE	TRUE	FALSE
9430018G01Rik	11.9305	-2.18365	0.000739	0.00316992	4.48789	FALSE	FALSE	FALSE	FALSE
9430021M05Rik	14.0778	-7.31434	2.2e-08	2.87e-07	4.26987	FALSE	FALSE	FALSE	FALSE
9530002B09Rik	12.1753	-2.88886	4.48e-05	0.000269613	3.3225	FALSE	FALSE	FALSE	FALSE
9530059O14Rik	7.87981	-3.44607	8.88e-05	0.000493978	2.72547	TRUE	FALSE	FALSE	FALSE
9530068E07Rik	246.984	0.9078	2.72e-05	0.000172661	3.97619	TRUE	FALSE	TRUE	FALSE
9530077C05Rik	324.656	-0.72897	2.34e-05	0.000151143	4.65967	TRUE	FALSE	FALSE	FALSE
Zfp976	16.4077	-2.69108	9.54e-06	6.85e-05	11.3354	TRUE	TRUE	TRUE	FALSE
9930021J03Rik	373.414	-1.33658	5.18e-09	7.57e-08	4.83744	TRUE	TRUE	TRUE	FALSE
A230009B12Rik	13.4025	-3.15263	1.71e-05	0.000114317	3.34808	TRUE	FALSE	FALSE	FALSE
A230028O05Rik	2.53348	-3.75222	0.0211119	0.0549389	3.68301	FALSE	FALSE	FALSE	FALSE
Washc4	72.9566	-1.65949	2.38e-08	3.09e-07	3.70134	TRUE	TRUE	TRUE	FALSE
A230057D06Rik	10.3429	-3.29992	1.16e-05	8.16e-05	3.36803	FALSE	FALSE	FALSE	FALSE
A230108P19Rik	9.81539	-2.07838	0.0142	0.0395601	1.17624	TRUE	FALSE	FALSE	FALSE
A330015K06Rik	8.36917	-1.51053	0.0339	0.0815746	3.27805	FALSE	FALSE	FALSE	FALSE
A330023F24Rik	17.2119	-3.39022	2.18e-08	2.86e-07	3.97161	TRUE	FALSE	FALSE	FALSE
A330048O09Rik	1.27172	-4.82403	0.0417	0.0963036	1.62952	FALSE	FALSE	FALSE	FALSE
A430005L14Rik	181.788	0.834507	0.000106	0.000577101	4.44865	FALSE	TRUE	TRUE	FALSE
A430035B10Rik	4.98873	-2.80352	0.0105	0.0305934	2.33422	FALSE	FALSE	FALSE	FALSE
A630010A05Rik	38.7617	-0.868846	0.0333	0.0804375	1.54357	FALSE	FALSE	FALSE	FALSE
A630066F11Rik	94.639	-0.538271	0.0493	0.110414	1.54352	TRUE	FALSE	FALSE	FALSE
Pate14	6.82312	-2.85608	0.000758324	0.00323923	5.78648	TRUE	TRUE	TRUE	TRUE
A630095N17Rik	22.1641	-0.913748	0.0382	0.0896756	4.00024	FALSE	FALSE	TRUE	FALSE
A730017L22Rik	6.05336	-2.00731	0.0199039	0.0523794	2.29811	FALSE	FALSE	FALSE	FALSE
A730082K24Rik	7.80484	-5.57949	1.96e-05	0.000129205	1.73534	FALSE	FALSE	FALSE	FALSE
Btbd8	94.4048	-1.34911	4.13e-06	3.23e-05	6.57507	FALSE	FALSE	FALSE	FALSE
A930002C04Rik	4.32476	-4.61773	0.00400166	0.0136446	1.52695	FALSE	FALSE	FALSE	FALSE
A930005H10Rik	10.4412	3.8584	0.00153	0.00597837	2.35833	FALSE	FALSE	FALSE	FALSE
A930007I19Rik	10.3868	-2.28192	0.00222129	0.0082406	2.02449	FALSE	FALSE	FALSE	FALSE
A930013F10Rik	7.54294	-3.29487	0.0020699	0.00775977	2.4492	FALSE	FALSE	FALSE	FALSE
A930018P22Rik	94.3086	1.22041	7.04e-06	5.21e-05	6.68247	FALSE	FALSE	TRUE	FALSE
A930019D19Rik	4.57265	-3.38465	0.00477	0.0158588	1.95924	FALSE	FALSE	FALSE	FALSE
A930024E05Rik	27.3484	-1.02894	0.038	0.0893345	1.25467	TRUE	FALSE	FALSE	FALSE
Aaas	141.722	0.852909	0.000728	0.00313215	3.69775	FALSE	FALSE	FALSE	FALSE
Aacs	75.0248	0.571121	0.0388	0.0909021	3.9352	FALSE	TRUE	TRUE	FALSE
Aadacl3	3.51154	-2.44003	0.0344344	0.0825289	1.9929	TRUE	TRUE	TRUE	FALSE
Aamp	1383.09	1.20014	2.21e-18	1.34e-16	12.8721	FALSE	FALSE	FALSE	FALSE
Aar2	164.363	0.865386	0.000223	0.00111551	4.30086	FALSE	FALSE	TRUE	FALSE
Aard	297.19	1.27339	1.61e-10	3.17e-09	6.34226	FALSE	FALSE	FALSE	FALSE
Aars2	162.191	0.715281	0.00198	0.00747084	3.35312	FALSE	FALSE	FALSE	FALSE
Aarsd1	49.9478	1.10046	0.00156	0.00606549	4.98709	FALSE	FALSE	FALSE	FALSE
Aasdhppt	161.702	-1.20171	2.61e-05	0.000166637	2.4506	TRUE	TRUE	TRUE	FALSE
AB124611	10.4778	-1.38975	0.0359	0.0853502	2.22481	FALSE	FALSE	FALSE	FALSE
Abca13	8.96448	-1.52432	0.0270598	0.0676175	3.33365	TRUE	TRUE	FALSE	FALSE
Abca14	592.291	-1.47438	4.07e-22	3.95e-20	8.75476	FALSE	FALSE	FALSE	FALSE
Abca15	352.256	-1.75097	3.25e-27	5e-25	15.5103	FALSE	FALSE	FALSE	FALSE
Abca16	584.749	-2.25053	1e-33	2.64e-31	5.71678	TRUE	FALSE	FALSE	FALSE
Abca17	388.972	-0.662429	3.99e-05	0.000243372	5.55697	FALSE	FALSE	FALSE	FALSE
Abca2	108.282	0.969817	0.000388	0.00181245	3.4871	FALSE	FALSE	FALSE	FALSE
Abca3	58.2456	1.24472	0.000734964	0.00315503	3.22234	TRUE	TRUE	FALSE	FALSE
Abca5	280.087	-1.52611	6.47e-15	2.46e-13	5.1319	TRUE	TRUE	TRUE	FALSE
Abca7	27.2822	1.41807	0.0061	0.0195451	2.94397	TRUE	FALSE	FALSE	FALSE
Abca8a	16.0214	-1.94392	0.000384	0.00179802	3.40483	FALSE	TRUE	FALSE	FALSE
Abca8b	8.49564	-1.94882	0.0151	0.0415157	1.6386	FALSE	FALSE	FALSE	FALSE
Abca9	107.253	-1.53582	1.14e-10	2.3e-09	9.34449	TRUE	TRUE	FALSE	FALSE
Abcb11	11.6066	-1.89884	0.00261	0.00946883	3.39831	TRUE	FALSE	TRUE	FALSE
Abcb5	2.17583	-3.51166	0.0381	0.0894714	7.02474	FALSE	FALSE	FALSE	FALSE
Abcb6	245.455	1.57829	5.42e-12	1.4e-10	4.70599	FALSE	FALSE	FALSE	FALSE
Abcb8	116.112	0.55061	0.0287459	0.0711287	2.58347	TRUE	TRUE	FALSE	FALSE
Abcb9	126.458	1.01853	0.00191055	0.00724312	2.32274	FALSE	FALSE	FALSE	FALSE
Abcc12	568.563	-0.747282	9.7e-05	0.000534118	3.3694	TRUE	FALSE	FALSE	FALSE
Abcc3	284.272	0.789359	0.0024	0.00880415	2.27182	FALSE	FALSE	FALSE	FALSE
Abcc4	22.6251	1.47411	0.00422	0.0142489	4.88462	FALSE	FALSE	TRUE	FALSE
Abcc9	14.8215	1.60954	0.0121592	0.0346908	4.14248	TRUE	TRUE	TRUE	TRUE
Abcd3	110.619	-0.585507	0.0138	0.0385641	3.2469	TRUE	TRUE	TRUE	FALSE
Abce1	467.067	-1.34538	2.6e-09	4.07e-08	2.76769	TRUE	TRUE	TRUE	FALSE
Abcg2	165.549	-1.13911	4.9e-08	5.91e-07	4.96526	FALSE	FALSE	FALSE	FALSE
Abhd12	224.603	0.489951	0.0127	0.0359497	3.42747	TRUE	FALSE	TRUE	FALSE
Abhd13	55.9045	-1.35022	3.35e-05	0.000207709	2.80214	TRUE	TRUE	TRUE	FALSE
Abhd14a	292.413	0.458625	0.0268214	0.0670792	2.13978	FALSE	FALSE	FALSE	FALSE
Abhd16a	384.27	0.495779	0.017103	0.0463408	2.09241	FALSE	FALSE	FALSE	FALSE
Abhd16b	265.583	0.656784	0.000306	0.00146511	6.05315	TRUE	TRUE	FALSE	FALSE
Abhd17a	513.993	1.85336	1.07e-25	1.45e-23	9.10707	FALSE	FALSE	FALSE	FALSE
Abhd17b	375.888	-1.1082	1.06e-06	9.39e-06	2.62165	TRUE	TRUE	FALSE	FALSE
Abhd2	669.666	0.76762	9.63e-06	6.91e-05	4.89138	FALSE	TRUE	TRUE	FALSE
Abhd8	598.571	1.53902	2.09e-20	1.62e-18	8.37043	FALSE	FALSE	TRUE	FALSE
Abi2	190.052	-0.443033	0.0164	0.0447317	10.9349	TRUE	TRUE	TRUE	FALSE
Abi3	27.8501	1.18128	0.0168367	0.0457139	2.2497	FALSE	FALSE	FALSE	FALSE
Abl1	542.369	0.48139	0.016	0.0438036	1.95829	FALSE	TRUE	FALSE	FALSE
Abr	75.2999	1.21292	0.00216	0.00803626	1.95389	TRUE	TRUE	TRUE	FALSE
Abracl	14.8034	-1.5872	0.0126126	0.0357462	1.58922	FALSE	FALSE	FALSE	FALSE
Abtb2	53.9065	2.10675	6.96e-08	8.11e-07	5.73928	FALSE	FALSE	FALSE	FALSE
Acaa1a	28.5363	1.54774	0.000686	0.00297405	8.51	FALSE	TRUE	FALSE	FALSE
Acaa2	97.376	1.84799	2.53e-10	4.79e-09	7.83466	FALSE	FALSE	FALSE	FALSE
Acaca	276.644	-0.579072	0.000447955	0.00204833	9.69552	TRUE	TRUE	TRUE	FALSE
Acad10	38.9085	0.81365	0.0401	0.0934705	2.39366	FALSE	FALSE	FALSE	FALSE
Acadl	82.1543	1.02721	0.00144	0.00565958	3.03309	TRUE	TRUE	FALSE	FALSE
Acads	55.1846	3.44217	1.02e-12	2.91e-11	8.65174	FALSE	FALSE	FALSE	FALSE
Acadvl	106.94	0.960392	7.19e-05	0.000410082	13.5527	FALSE	FALSE	FALSE	FALSE
Acan	7.6721	3.41284	0.00548	0.0178396	4.01118	FALSE	FALSE	FALSE	FALSE
Acap2	87.8352	-0.749272	0.00852	0.0257916	2.72274	TRUE	TRUE	TRUE	FALSE
Acat2	1664	-2.69155	1.76e-19	1.27e-17	5.21727	FALSE	TRUE	FALSE	FALSE
Acat3	2808.96	-2.30929	7.22e-06	5.32e-05	4.54848	FALSE	FALSE	FALSE	FALSE
Acbd3	176.189	-0.538698	0.00629	0.0200373	4.14859	FALSE	TRUE	TRUE	FALSE
Acbd5	143.366	-1.23386	3.56e-09	5.42e-08	7.52671	TRUE	TRUE	FALSE	TRUE
Acbd6	562.441	0.823121	5.16e-08	6.2e-07	10.5369	FALSE	FALSE	FALSE	FALSE
Acd	100.534	0.56318	0.0379	0.0890881	2.17003	FALSE	FALSE	FALSE	FALSE
Ace	2184.8	0.843055	7.43e-11	1.55e-09	10.9171	FALSE	FALSE	TRUE	FALSE
Ace3	284.042	0.466064	0.00989132	0.0291549	3.75098	FALSE	FALSE	FALSE	FALSE
Acer3	73.0105	-1.15036	0.00108	0.00439963	2.40127	FALSE	FALSE	TRUE	FALSE
Ache	6.4324	-4.6722	4.51e-05	0.000271012	5.0112	FALSE	FALSE	FALSE	FALSE
Ackr2	2.40207	3.72471	0.0265557	0.0665618	3.94362	FALSE	TRUE	TRUE	FALSE
Acly	279.275	0.968956	1.6e-07	1.72e-06	7.59551	FALSE	FALSE	FALSE	FALSE
Acmsd	2.21352	-5.62417	0.00519	0.0170263	1.6063	FALSE	TRUE	TRUE	FALSE
Aco2	542.355	0.547079	0.00869	0.0261988	2.37001	TRUE	TRUE	FALSE	FALSE
Acot10	128.055	-1.63904	9.26e-08	1.06e-06	2.83051	FALSE	FALSE	FALSE	FALSE
Acot2	2.77542	3.92332	0.0206	0.0538667	1.88574	FALSE	FALSE	FALSE	FALSE
Acot7	1435.89	1.35966	6.75e-22	6.35e-20	13.1347	FALSE	FALSE	TRUE	FALSE
Acot8	77.2299	1.02664	0.00283107	0.0101584	2.39093	FALSE	FALSE	FALSE	FALSE
Acot9	180.449	-1.43332	2.04e-05	0.00013397	1.62166	FALSE	FALSE	FALSE	FALSE
Acp1	124.874	-1.20418	2.44e-06	2.01e-05	3.08579	TRUE	FALSE	TRUE	FALSE
Acr	675.175	0.526823	0.000143	0.000755764	12.6292	FALSE	TRUE	TRUE	FALSE
Acrbp	1328.29	0.753489	8.73e-06	6.32e-05	5.18967	FALSE	FALSE	FALSE	FALSE
Acrv1	811.076	-0.952041	0.00179452	0.00685186	1.27179	TRUE	TRUE	TRUE	FALSE
Acsbg1	754.364	1.69985	1.58e-20	1.24e-18	8.0612	FALSE	FALSE	FALSE	FALSE
Acsbg2	884.836	0.721417	6.91e-06	5.12e-05	4.88742	FALSE	FALSE	FALSE	FALSE
Acsf2	39.7367	2.81176	4.42e-08	5.38e-07	4.12955	FALSE	TRUE	TRUE	FALSE
Acsl1	2914.39	-0.363439	0.0381178	0.0895033	1.61597	TRUE	TRUE	FALSE	FALSE
Acsl3	120.362	-0.699461	0.00153	0.00595726	8.01964	FALSE	FALSE	FALSE	FALSE
Acsl4	127.993	-1.11001	0.000139	0.000735371	2.16253	TRUE	FALSE	FALSE	FALSE
Acsl6	261.353	0.569953	0.00652	0.020625	2.75139	TRUE	TRUE	FALSE	FALSE
Acss1	56.6181	0.89052	0.0104003	0.0304403	2.96272	FALSE	FALSE	TRUE	FALSE
Acta2	162.241	1.38573	5.93e-07	5.61e-06	4.96042	FALSE	FALSE	TRUE	FALSE
Actb	2683.76	1.10712	1.07e-07	1.2e-06	5.39397	FALSE	FALSE	TRUE	FALSE
Actg1	1096.59	0.91251	1.26e-10	2.51e-09	8.75071	FALSE	FALSE	TRUE	FALSE
Actg2	886.954	0.982418	6.61e-12	1.66e-10	9.77287	FALSE	FALSE	FALSE	FALSE
Actl10	88.8398	1.07505	0.000475093	0.00215237	2.8371	FALSE	FALSE	FALSE	FALSE
Actl7a	1206.7	0.411748	0.00598	0.0191954	3.24847	FALSE	FALSE	FALSE	FALSE
Actl7b	2224.97	1.58711	4.08e-24	4.6e-22	10.4183	FALSE	FALSE	FALSE	FALSE
Actl9	1552.64	0.744516	2.34e-08	3.04e-07	8.43276	FALSE	FALSE	FALSE	FALSE
Actn1	29.7606	1.09028	0.0148	0.0410257	3.16528	TRUE	TRUE	FALSE	FALSE
Actn3	30.5863	0.987699	0.0281	0.0697954	2.39831	FALSE	FALSE	TRUE	FALSE
Actn4	190.916	0.776284	0.000312192	0.00149135	4.46645	TRUE	TRUE	FALSE	FALSE
Actr1a	1037.21	0.584268	6.36e-06	4.75e-05	14.437	TRUE	FALSE	TRUE	FALSE
Actr1b	82.0851	0.716988	0.0473811	0.106875	1.59023	FALSE	TRUE	TRUE	FALSE
Actr2	151.601	-0.933309	6.04e-06	4.55e-05	6.80455	TRUE	TRUE	TRUE	TRUE
Actr5	59.0539	0.919235	0.00429068	0.0144671	4.17217	TRUE	TRUE	FALSE	FALSE
Actr6	123.12	-1.89767	3.33e-08	4.19e-07	3.02873	TRUE	FALSE	FALSE	FALSE
Actrt1	98.7473	-1.17147	0.00294	0.0105064	1.19034	FALSE	FALSE	FALSE	FALSE
Acvr2a	126.708	-1.22243	2.02e-07	2.15e-06	3.8755	TRUE	FALSE	FALSE	FALSE
Acvrl1	7.82499	2.83561	0.00990755	0.0291813	3.15532	TRUE	FALSE	TRUE	FALSE
Acy1	8.99782	3.68321	0.00217	0.00805724	4.83654	FALSE	FALSE	FALSE	FALSE
Acyp1	487.654	-0.68993	0.0139064	0.0388254	1.15826	FALSE	FALSE	FALSE	FALSE
Adad1	895.756	-0.661905	3.49e-05	0.000215898	3.56749	FALSE	FALSE	FALSE	FALSE
Adad2	144.796	0.682558	0.00293777	0.0105019	3.83986	FALSE	FALSE	TRUE	FALSE
Adal	54.1603	-1.24445	0.00169	0.00650943	2.61722	TRUE	TRUE	TRUE	FALSE
Adam18	538.37	-0.882979	1.83e-05	0.000121828	2.52858	FALSE	FALSE	FALSE	FALSE
Adam1a	570.728	-0.505866	0.00268	0.00968786	3.05374	TRUE	TRUE	FALSE	FALSE
Adam1b	338.511	-0.835695	2.63e-05	0.000167753	3.48362	FALSE	FALSE	FALSE	FALSE
Adam20	147.477	-1.70296	6.38e-09	9.24e-08	2.42765	FALSE	FALSE	FALSE	FALSE
Adam24	542.945	-1.71253	1.24e-10	2.48e-09	2.31282	TRUE	FALSE	FALSE	FALSE
Adam25	126.531	-1.27268	9.13e-05	0.000506008	1.83954	FALSE	FALSE	FALSE	FALSE
Adam26a	157.389	-1.28031	0.000121	0.000649549	1.88776	FALSE	FALSE	FALSE	FALSE
Adam26b	57.8618	-1.60459	2.86e-06	2.32e-05	3.75597	FALSE	FALSE	FALSE	FALSE
Adam29	249.923	-2.23312	4.33e-09	6.5e-08	1.70812	FALSE	FALSE	FALSE	FALSE
Adam3	4146.34	-1.10506	2.38e-06	1.97e-05	2.05607	FALSE	FALSE	FALSE	FALSE
Adam30	266.216	-0.646146	0.000367	0.00172783	5.40955	FALSE	FALSE	FALSE	FALSE
Adam32	1721.42	-0.762877	1.57e-08	2.12e-07	7.87156	FALSE	FALSE	FALSE	FALSE
Adam34	58.1568	-2.21547	2.27e-09	3.59e-08	3.00287	FALSE	FALSE	FALSE	FALSE
Adam39	115.555	-1.19128	2.92e-05	0.000183386	2.26799	FALSE	FALSE	FALSE	FALSE
Adam4	186.074	-1.27316	7.52e-09	1.08e-07	3.89697	FALSE	FALSE	FALSE	FALSE
Adam5	4202.55	-1.29952	1.23e-08	1.69e-07	2.37664	FALSE	FALSE	FALSE	FALSE
Adam6a	299.104	-1.38256	9.67e-15	3.61e-13	7.65519	FALSE	FALSE	FALSE	FALSE
Adam6b	227.955	-1.42328	4.14e-10	7.53e-09	5.26403	FALSE	FALSE	FALSE	FALSE
Adamts9	19.1172	-1.89169	0.00035	0.00165468	2.61417	FALSE	FALSE	FALSE	FALSE
Adamtsl1	21.5609	-1.0408	0.0234	0.0598781	4.19843	TRUE	TRUE	TRUE	FALSE
Adamtsl2	4.63005	-2.52675	0.0142642	0.0396722	5.51241	FALSE	FALSE	FALSE	FALSE
Adamtsl3	11.3549	-1.97052	0.00178	0.00678896	3.51511	TRUE	TRUE	FALSE	TRUE
Adap1	28.1004	1.30454	0.00707	0.0220449	3.34759	TRUE	TRUE	TRUE	FALSE
Adap2	5.51738	2.87778	0.024261	0.0617038	3.15627	FALSE	FALSE	TRUE	FALSE
Adat1	69.619	0.694871	0.0370192	0.0874777	1.75492	TRUE	TRUE	FALSE	FALSE
Adat3	40.972	1.27517	0.00333	0.0116798	3.05644	FALSE	TRUE	FALSE	FALSE
Adck1	65.942	0.966742	0.00146149	0.00572835	5.5242	FALSE	FALSE	TRUE	FALSE
Adck2	24.9679	1.91054	0.000557	0.00247672	3.45014	FALSE	TRUE	FALSE	FALSE
Coq8a	85.6745	1.48241	4.71e-07	4.55e-06	7.14674	FALSE	FALSE	TRUE	FALSE
Coq8b	60.3628	1.70889	3.97e-07	3.91e-06	10.6237	TRUE	FALSE	FALSE	FALSE
Adck5	57.135	1.69879	4.16e-06	3.25e-05	4.35655	FALSE	FALSE	FALSE	FALSE
Adcy10	1643.53	-0.970202	2.54e-07	2.63e-06	3.9572	FALSE	FALSE	TRUE	FALSE
Adcy5	21.5453	1.23205	0.0349	0.0833099	1.94838	FALSE	TRUE	TRUE	FALSE
Adcy9	59.9499	0.97917	0.0034	0.011875	3.0887	FALSE	TRUE	TRUE	FALSE
Adgb	441.208	-0.754631	2.58e-06	2.11e-05	5.61665	TRUE	FALSE	FALSE	FALSE
Adgra2	103.716	0.958153	0.000444	0.00203296	4.13063	FALSE	FALSE	FALSE	FALSE
Adgrb1	28.4569	-0.979414	0.0332887	0.0803341	2.25435	FALSE	FALSE	FALSE	FALSE
Adgrb2	55.9608	-1.34387	0.000297	0.00142776	2.84515	FALSE	FALSE	FALSE	FALSE
Adgre5	31.9521	0.911076	0.0326	0.0790024	2.77539	FALSE	FALSE	FALSE	FALSE
Adgrg1	123.573	0.796405	0.00462	0.0154275	2.61331	FALSE	FALSE	TRUE	FALSE
Adgrl2	121.43	-0.659118	0.00503	0.016599	2.59682	TRUE	FALSE	FALSE	FALSE
Adgrv1	198.939	-1.54146	2.62e-15	1.05e-13	7.63006	TRUE	FALSE	FALSE	FALSE
Adh1	55.8914	3.34219	3.57e-11	7.86e-10	6.87154	FALSE	FALSE	FALSE	FALSE
Adh7	43.6166	-1.09012	0.00755985	0.0233373	2.07748	FALSE	FALSE	FALSE	FALSE
Adh5	95.4933	0.794077	0.00280399	0.0100812	4.18313	FALSE	FALSE	FALSE	FALSE
Adi1	29.3684	1.08915	0.0222	0.057295	2.27344	FALSE	FALSE	TRUE	FALSE
Adipoq	81.7424	-0.911304	0.00103738	0.00425708	4.42587	FALSE	TRUE	TRUE	FALSE
Adipor1	387.185	1.13693	3.16e-07	3.2e-06	5.72925	FALSE	TRUE	TRUE	FALSE
Ado	143.426	0.572406	0.0183	0.0488986	2.52342	FALSE	TRUE	TRUE	TRUE
Adora1	137.022	0.703892	0.00511	0.0167859	2.7485	TRUE	TRUE	TRUE	FALSE
Adprh	144.147	2.11845	3.64e-14	1.27e-12	10.7318	FALSE	FALSE	FALSE	FALSE
Adprs	17.8838	2.55144	0.000425	0.00195815	3.02526	FALSE	FALSE	FALSE	FALSE
Adra1d	78.0879	0.866438	0.00878134	0.0264167	2.36826	TRUE	TRUE	FALSE	FALSE
Grk2	47.6384	1.79871	6.93e-06	5.14e-05	6.41825	FALSE	FALSE	TRUE	FALSE
Grk3	240.185	-1.25714	2.98e-07	3.04e-06	3.95802	TRUE	FALSE	FALSE	FALSE
Adrm1	233.955	2.29639	2.57e-28	4.49e-26	51.3495	FALSE	FALSE	FALSE	FALSE
Adsl	120.87	2.15915	4.55e-14	1.57e-12	5.98563	FALSE	TRUE	TRUE	FALSE
Adssl1	361.314	-0.695932	2.33e-05	0.000151017	5.74646	FALSE	FALSE	FALSE	FALSE
Adtrp	107.541	-1.2618	0.000124	0.000664988	2.06437	TRUE	TRUE	TRUE	FALSE
Aebp1	60.6196	2.43821	0.0448	0.102215	4.19139	FALSE	FALSE	FALSE	FALSE
Aebp2	143.455	-0.807549	0.000281	0.00135813	3.23549	TRUE	TRUE	TRUE	FALSE
Tle5	229.229	1.92205	1.08e-21	9.8e-20	41.3004	FALSE	FALSE	FALSE	FALSE
Semp2l2a	450.651	-1.94994	8.05e-24	8.92e-22	5.20264	TRUE	FALSE	FALSE	FALSE
Aff2	26.9927	1.40194	0.00593	0.0190684	3.14682	TRUE	FALSE	FALSE	FALSE
Aff4	630.541	-0.991329	4.53e-11	9.78e-10	12.3224	TRUE	FALSE	TRUE	FALSE
Afg3l1	155.177	1.37433	1.27e-08	1.73e-07	7.65893	TRUE	FALSE	TRUE	FALSE
Afg3l2	169.416	0.562633	0.0222	0.0573665	2.1213	FALSE	FALSE	TRUE	FALSE
Afm	10.6833	-3.29993	1.64e-05	0.000110755	2.88507	FALSE	FALSE	FALSE	FALSE
Aftph	368.889	-0.666519	0.000148	0.000778045	4.09836	TRUE	FALSE	FALSE	FALSE
Agap3	71.5674	1.19055	4.76e-05	0.000283616	9.39169	FALSE	FALSE	FALSE	FALSE
Agbl1	12.1716	-1.29196	0.0282	0.0699533	3.6594	FALSE	FALSE	FALSE	FALSE
Agbl2	542.022	-0.404479	0.00380062	0.0130571	14.8641	TRUE	FALSE	TRUE	FALSE
Agbl3	461.897	-1.29327	1.68e-12	4.61e-11	6.05974	TRUE	TRUE	TRUE	FALSE
Agfg1	651.45	-0.574423	0.000766	0.00326423	2.98965	TRUE	TRUE	FALSE	TRUE
Agfg2	86.89	0.972339	0.00172	0.00662403	3.32317	FALSE	FALSE	FALSE	FALSE
Ago2	136.9	-0.60313	0.00833169	0.0253071	2.55549	FALSE	TRUE	TRUE	FALSE
Ago3	75.0978	-1.3771	0.00013	0.000692572	1.93269	FALSE	TRUE	TRUE	FALSE
Agpat2	564.041	0.482524	0.00312	0.011077	3.66694	FALSE	TRUE	TRUE	FALSE
Agpat3	1367.07	0.598486	1.57e-05	0.000106728	5.42739	TRUE	TRUE	TRUE	FALSE
Agpat4	63.6824	0.895623	0.00973	0.0287949	2.62037	TRUE	FALSE	FALSE	FALSE
Gpat4	2783.92	0.285479	0.0351	0.083752	2.61417	TRUE	TRUE	TRUE	FALSE
Gpat3	110.8	-1.11553	7.12e-06	5.26e-05	4.95013	TRUE	FALSE	FALSE	FALSE
Agps	69.8253	-0.780106	0.0062	0.0197972	3.09844	TRUE	TRUE	TRUE	FALSE
Agr3	10.2496	-2.20018	0.0127	0.0359014	1.70928	FALSE	TRUE	FALSE	FALSE
Agrp	8.08496	-2.02821	0.0184291	0.0491922	1.42662	FALSE	FALSE	FALSE	FALSE
Agt	1228.53	2.15675	7.67e-19	5.03e-17	7.15059	FALSE	TRUE	FALSE	FALSE
Agtpbp1	848.331	-0.649845	1.97e-05	0.000130058	5.67135	TRUE	TRUE	TRUE	FALSE
Agtr1b	6.3044	-5.18892	9.78e-05	0.000538087	2.41794	TRUE	FALSE	FALSE	FALSE
Agtrap	144.436	0.676421	0.0057033	0.0184428	2.93716	TRUE	FALSE	TRUE	FALSE
Ahctf1	2134.62	-1.2002	3.02e-18	1.82e-16	9.03312	FALSE	TRUE	FALSE	FALSE
Ahcy	71.0558	1.88836	3.37e-08	4.22e-07	6.4809	FALSE	FALSE	TRUE	FALSE
Ahcyl1	313.525	-0.735663	4.75e-05	0.000283323	5.91153	TRUE	TRUE	FALSE	TRUE
Ahdc1	384.219	0.692212	0.0106	0.0310308	1.59468	FALSE	FALSE	FALSE	FALSE
Ahi1	774.768	-0.669001	3.16e-05	0.000196694	5.3058	TRUE	FALSE	TRUE	FALSE
Ahsa1	113.758	1.42602	5.21e-07	4.98e-06	5.44889	FALSE	TRUE	FALSE	FALSE
Igsf9b	19.5362	-2.01353	0.000623	0.0027363	1.52511	TRUE	FALSE	TRUE	FALSE
AI429214	253.142	-1.10327	6.34e-08	7.45e-07	3.80424	FALSE	TRUE	FALSE	FALSE
Myorg	70.086	0.922622	0.00250695	0.0091435	4.00094	FALSE	TRUE	TRUE	FALSE
AI506816	3.94174	4.44044	0.0080693	0.0246254	1.70977	TRUE	FALSE	FALSE	FALSE
AI507597	492.582	0.338716	0.0469455	0.106064	2.31864	TRUE	FALSE	FALSE	FALSE
AI597479	135.809	-1.68612	7.36e-13	2.15e-11	4.84017	TRUE	TRUE	TRUE	FALSE
Ifi207	4.74936	-2.29188	0.0392	0.0915378	4.76003	FALSE	FALSE	FALSE	FALSE
AI646519	3.91893	-3.51178	0.00833	0.0252957	1.24023	FALSE	FALSE	FALSE	FALSE
AI837181	144.822	1.92899	1.62e-15	6.67e-14	17.8768	FALSE	FALSE	FALSE	FALSE
Spindoc	174.095	1.06734	3.86e-05	0.000235684	3.41895	TRUE	TRUE	TRUE	FALSE
AI854703	2.38198	3.70109	0.0303	0.074442	2.45688	TRUE	FALSE	FALSE	FALSE
AI987944	223.966	-2.14478	6.42e-15	2.45e-13	3.18581	TRUE	TRUE	FALSE	FALSE
Aida	61.505	-0.782537	0.00753	0.0232661	3.15322	TRUE	TRUE	TRUE	FALSE
Aifm3	12.554	2.41953	0.00176	0.00675232	5.36835	FALSE	FALSE	TRUE	FALSE
Crybg2	10.0108	2.33726	0.00566279	0.0183576	7.08944	TRUE	FALSE	FALSE	FALSE
Aimp2	68.8086	1.86758	6.49e-08	7.61e-07	6.94316	FALSE	FALSE	FALSE	FALSE
Aip	43.2283	1.96617	1.95e-05	0.000128594	3.24508	FALSE	FALSE	TRUE	FALSE
Ajuba	60.8376	1.09765	0.00191	0.00725203	2.73566	FALSE	FALSE	TRUE	FALSE
Ak1	859.6	0.912772	4.72e-08	5.72e-07	5.42644	FALSE	TRUE	FALSE	FALSE
Ak2	282.471	0.474961	0.0268	0.0670204	2.10283	FALSE	FALSE	FALSE	FALSE
Ak4	23.6874	-1.31892	0.00280639	0.0100858	3.15335	TRUE	TRUE	TRUE	FALSE
Ak7	293.116	-0.363857	0.0455	0.103485	2.2573	TRUE	TRUE	FALSE	FALSE
Ak8	806.982	0.495176	0.000465	0.0021125	6.45566	FALSE	FALSE	FALSE	FALSE
Akap1	2453.93	0.360015	0.0428	0.098503	1.68784	FALSE	FALSE	FALSE	FALSE
Akap10	345.158	-0.754942	4.55e-05	0.000273347	3.29522	TRUE	FALSE	TRUE	FALSE
Akap11	324.694	-1.18765	5.77e-08	6.85e-07	3.7969	TRUE	TRUE	TRUE	FALSE
Akap12	8226.67	-0.799596	0.000279	0.00135106	3.4391	FALSE	FALSE	FALSE	FALSE
Akap17b	55.717	-1.72593	1.14e-08	1.58e-07	7.34103	TRUE	TRUE	FALSE	FALSE
Akap4	8361.88	-0.362468	0.0486199	0.10933	1.34821	FALSE	FALSE	FALSE	FALSE
Akap6	38.6649	-1.20053	0.00444	0.0149035	2.11612	TRUE	TRUE	TRUE	TRUE
Akap8	156.723	-0.792399	0.000418989	0.0019334	2.76977	TRUE	FALSE	FALSE	FALSE
Akap9	368.201	-2.00573	3.86e-19	2.61e-17	5.86701	FALSE	FALSE	FALSE	FALSE
Akirin1	277.553	0.692166	0.00222306	0.00824546	2.59434	FALSE	FALSE	FALSE	FALSE
Akna	269.671	0.381184	0.035	0.0835276	3.22176	TRUE	FALSE	TRUE	FALSE
Aknad1	121.064	-0.59452	0.00778	0.0239269	4.42097	TRUE	FALSE	TRUE	FALSE
Akr1a1	353.057	1.2583	1.13e-08	1.57e-07	4.93833	TRUE	FALSE	FALSE	FALSE
Akr1b7	14.8178	-1.9485	0.00195	0.00735616	3.1195	FALSE	FALSE	FALSE	FALSE
Akr1b8	119.939	0.636952	0.0186717	0.0497155	2.08289	FALSE	FALSE	FALSE	FALSE
Akr1e1	124.716	-0.55839	0.0441	0.100754	1.25536	FALSE	TRUE	FALSE	FALSE
Akr7a5	98.6389	1.19944	4.56e-05	0.000273595	4.87215	FALSE	FALSE	FALSE	FALSE
Akt1	144.324	1.2039	3.95e-06	3.1e-05	5.31086	TRUE	FALSE	FALSE	FALSE
Akt2	213.607	0.851551	1.1e-05	7.79e-05	7.85711	FALSE	FALSE	TRUE	FALSE
Akt3	250.364	-0.748898	4.22e-05	0.00025534	5.89895	TRUE	TRUE	TRUE	FALSE
Alad	106.436	1.24931	0.000268	0.0013017	2.0232	FALSE	TRUE	TRUE	FALSE
Alas1	410.349	0.681522	0.00287	0.0102934	2.69277	FALSE	FALSE	FALSE	FALSE
Alas2	71.4268	0.709762	0.02	0.0526288	2.76885	FALSE	FALSE	FALSE	FALSE
Aldh16a1	41.9711	1.76942	8.7e-06	6.3e-05	9.48652	FALSE	TRUE	FALSE	FALSE
Aldh18a1	30.8003	1.69273	0.000262178	0.00128003	5.0241	TRUE	TRUE	TRUE	FALSE
Aldh1a1	1076.24	1.39071	1.34e-07	1.47e-06	3.37691	TRUE	FALSE	TRUE	FALSE
Aldh1b1	86.9689	2.10697	5.04e-09	7.4e-08	4.90059	FALSE	FALSE	FALSE	FALSE
Aldh1l1	248.865	1.13398	5.98e-07	5.65e-06	4.70771	FALSE	TRUE	FALSE	FALSE
Aldh2	438.642	3.00004	4.11e-42	1.78e-39	10.9173	TRUE	TRUE	TRUE	FALSE
Aldh3a1	32.1009	3.6696	1.09e-07	1.22e-06	3.76714	FALSE	FALSE	FALSE	FALSE
Aldh3b1	129.548	0.668404	0.00502	0.0165763	3.72658	FALSE	FALSE	FALSE	FALSE
Aldh3b2	87.801	0.898624	0.000631	0.00276354	8.02367	FALSE	FALSE	TRUE	FALSE
Aldh4a1	46.5808	2.16316	2.74e-07	2.81e-06	8.22732	FALSE	TRUE	TRUE	FALSE
Aldh4a1	47.2833	-0.929181	0.00504	0.0166317	3.33816	FALSE	TRUE	TRUE	FALSE
Aldh6a1	191.942	-1.06207	2.31e-08	3.01e-07	7.46968	TRUE	TRUE	TRUE	FALSE
Aldh7a1	150.414	1.36558	3.72e-07	3.7e-06	5.44932	TRUE	TRUE	TRUE	FALSE
Aldh9a1	241.57	0.831994	4.25e-06	3.31e-05	15.2633	FALSE	FALSE	FALSE	FALSE
Aldoa	1319.16	1.23497	4.65e-13	1.4e-11	9.76528	TRUE	FALSE	FALSE	FALSE
Aldoart1	507.065	-0.348152	0.0268734	0.0671816	3.43012	FALSE	FALSE	FALSE	FALSE
Aldoart2	1286.53	0.493542	0.00621	0.01981	2.64347	FALSE	FALSE	TRUE	FALSE
Aldoc	34.992	2.39601	5.18e-07	4.96e-06	9.27232	FALSE	FALSE	FALSE	FALSE
Alg1	28.5586	1.4833	0.00141	0.00554198	5.59621	FALSE	FALSE	FALSE	FALSE
Alg10b	60.0873	-0.930699	0.00185831	0.00706867	4.08976	FALSE	FALSE	TRUE	FALSE
Alg11	83.4787	-0.722585	0.00363	0.0125537	8.2493	FALSE	TRUE	TRUE	FALSE
Alg12	136.699	1.76297	5.21e-06	3.98e-05	2.36202	FALSE	FALSE	FALSE	FALSE
Alg13	182.858	-0.873827	1.58e-05	0.000106807	5.18156	TRUE	FALSE	FALSE	FALSE
Pdcd6	60.5213	1.17523	0.000466	0.00211809	4.56851	TRUE	FALSE	TRUE	FALSE
Alg6	18.7754	-1.37163	0.0284171	0.0704205	1.84036	TRUE	TRUE	FALSE	TRUE
Alkbh2	6.97479	5.25674	0.000126962	0.000677991	6.34725	FALSE	FALSE	FALSE	FALSE
Alkbh3	172.997	-0.458229	0.0415314	0.0962129	1.68993	TRUE	TRUE	TRUE	FALSE
Alkbh7	79.7304	2.17635	1.52e-07	1.64e-06	2.54187	TRUE	TRUE	FALSE	FALSE
Allc	1697.32	0.427898	0.00671	0.0211242	2.46449	FALSE	FALSE	FALSE	FALSE
Alms1	1403.38	-1.24906	8.41e-17	4.11e-15	6.34968	FALSE	FALSE	FALSE	FALSE
Alpk1	28.1402	-2.12658	3.19e-07	3.23e-06	6.75523	FALSE	TRUE	TRUE	FALSE
Alpl	30.7697	0.940641	0.0219535	0.0567808	7.41437	FALSE	FALSE	FALSE	FALSE
Alppl2	16.7621	1.82302	0.0118	0.0337348	2.32069	FALSE	FALSE	TRUE	FALSE
C2cd6	1200.22	-1.1614	5e-07	4.81e-06	2.2083	TRUE	TRUE	FALSE	TRUE
Flacc1	473.686	-1.30234	3.35e-08	4.2e-07	2.51269	FALSE	FALSE	FALSE	FALSE
Alx4	1.37516	-4.9115	0.0349	0.0832847	1.62902	TRUE	FALSE	TRUE	FALSE
Alyref	154.966	0.540704	0.0281	0.0698007	2.07641	FALSE	TRUE	FALSE	FALSE
Amacr	23.2972	1.55391	0.00226603	0.00838937	5.58941	FALSE	TRUE	TRUE	FALSE
Amer3	2.43557	3.73892	0.0236	0.0603037	15.0895	TRUE	TRUE	TRUE	FALSE
Amfr	579.838	0.809463	1.06e-06	9.42e-06	5.52348	FALSE	TRUE	TRUE	FALSE
Amhr2	693.492	1.14355	4.49e-06	3.48e-05	4.47819	FALSE	FALSE	FALSE	FALSE
Amigo1	14.8318	-1.34872	0.0118	0.0337253	4.55503	TRUE	FALSE	TRUE	FALSE
Ammecr1l	551.567	-0.351265	0.036537	0.0865633	1.99192	TRUE	FALSE	TRUE	FALSE
Amn	20.3664	2.06074	0.000741	0.00317445	4.77614	FALSE	FALSE	TRUE	FALSE
Amn1	295.314	-1.41304	3.11e-08	3.93e-07	2.38947	FALSE	FALSE	FALSE	FALSE
Amot	64.1785	-0.754104	0.0289	0.0714428	2.18483	TRUE	TRUE	TRUE	FALSE
Amotl2	29.2348	1.12139	0.0402518	0.0937265	1.2469	FALSE	FALSE	TRUE	FALSE
Ampd2	23.7193	1.24129	0.0489	0.10976	1.5613	TRUE	FALSE	FALSE	FALSE
Anapc10	105.113	-1.92871	5.22e-12	1.35e-10	3.2936	TRUE	TRUE	TRUE	FALSE
Anapc11	175.592	1.88637	9.51e-13	2.73e-11	5.75136	TRUE	TRUE	TRUE	FALSE
Anapc16	60.292	1.30156	0.000251	0.00123406	3.80158	TRUE	TRUE	TRUE	FALSE
Anapc2	159.885	1.05846	1.05e-06	9.33e-06	8.78244	FALSE	FALSE	FALSE	FALSE
Anapc4	133.397	-0.438984	0.0430466	0.0989533	3.72382	FALSE	FALSE	FALSE	FALSE
Anapc5	315.522	0.91171	1.69e-07	1.82e-06	9.86234	TRUE	TRUE	FALSE	FALSE
Anapc7	81.8764	0.738516	0.0324531	0.0786415	1.79247	FALSE	TRUE	FALSE	FALSE
Angel2	184.387	-0.673017	0.000694554	0.00300571	3.91083	TRUE	TRUE	TRUE	TRUE
Angpt1	1.37516	-4.9115	0.0348689	0.0832847	1.62902	TRUE	TRUE	FALSE	FALSE
Angptl1	7.90087	-2.40781	0.00223	0.00825589	4.34961	TRUE	FALSE	FALSE	FALSE
Angptl6	2.90089	3.98508	0.0137	0.0384791	3.26372	FALSE	FALSE	FALSE	FALSE
Ank2	429.897	-0.589276	0.00846	0.0256375	1.98792	TRUE	TRUE	TRUE	FALSE
Ankar	661.786	-1.5632	1.74e-18	1.06e-16	4.99651	FALSE	FALSE	FALSE	FALSE
Ankef1	1792.21	-0.389902	0.00807	0.0246228	2.82114	FALSE	FALSE	FALSE	FALSE
Ankfy1	148.764	-0.479514	0.026	0.065403	2.65469	TRUE	TRUE	TRUE	TRUE
Ankhd1	503.749	-1.01587	6.24e-10	1.1e-08	10.7048	FALSE	FALSE	FALSE	FALSE
Ankra2	110.611	-0.789831	0.000687431	0.00297772	3.8689	TRUE	TRUE	FALSE	TRUE
Ankrd10	179.676	-0.531594	0.0453484	0.103161	1.30212	TRUE	FALSE	TRUE	FALSE
Gm9517	243.118	-1.91352	2.89e-15	1.16e-13	7.00666	FALSE	FALSE	FALSE	FALSE
Ankrd13a	1183.84	-0.417209	0.0105	0.0307727	3.03604	TRUE	TRUE	TRUE	FALSE
Ankrd17	439.416	-0.827162	1.91e-06	1.61e-05	5.60646	FALSE	FALSE	TRUE	FALSE
Ankrd2	5.06173	2.73873	0.0355	0.084551	3.82638	FALSE	FALSE	FALSE	FALSE
Ankrd23	24.8776	-1.01379	0.0222	0.057295	2.69183	TRUE	TRUE	FALSE	FALSE
Ankrd26	25.315	-1.03136	0.0403	0.0937983	1.63654	FALSE	TRUE	FALSE	FALSE
Ankrd28	283.906	-0.698129	0.0023	0.00849653	1.86378	TRUE	TRUE	TRUE	FALSE
Slf1	208.974	-2.1895	1.05e-21	9.59e-20	5.60877	TRUE	FALSE	FALSE	FALSE
Ankrd33b	51.8733	-0.831311	0.0156405	0.0428634	1.89025	TRUE	TRUE	TRUE	FALSE
Ankrd36	1420.4	-0.377517	0.0106	0.0309292	2.97643	TRUE	TRUE	TRUE	FALSE
Ankrd40	172.653	1.0818	1.33e-06	1.15e-05	5.96785	TRUE	TRUE	FALSE	FALSE
Ankrd44	68.4938	-1.56251	1.76e-08	2.35e-07	6.61568	TRUE	FALSE	FALSE	FALSE
Ankrd45	305.491	-1.63017	7.63e-14	2.55e-12	3.73726	FALSE	FALSE	FALSE	FALSE
Ankrd49	183.829	-0.9448	0.000107	0.000582013	2.29752	TRUE	FALSE	TRUE	FALSE
Ankrd54	862.977	0.915054	4e-08	4.92e-07	5.90374	TRUE	FALSE	TRUE	FALSE
Ankrd55	106.465	-1.48997	1.86e-09	2.98e-08	5.29976	TRUE	FALSE	FALSE	TRUE
Ankrd60	637.843	0.560522	0.000977	0.00404661	3.24293	FALSE	FALSE	FALSE	FALSE
Ankrd7	445.112	-1.57698	1.3e-07	1.44e-06	2.21553	FALSE	FALSE	FALSE	FALSE
Ankrd9	174.547	0.861357	2.27e-05	0.00014744	9.80423	FALSE	FALSE	FALSE	FALSE
Anks1	97.186	0.545836	0.0413587	0.095886	2.37758	TRUE	TRUE	TRUE	FALSE
Anks6	56.7768	-3.19902	3.75e-16	1.71e-14	5.33179	FALSE	FALSE	FALSE	FALSE
Anln	222.016	-0.470457	0.0201799	0.0529398	2.60686	TRUE	TRUE	FALSE	TRUE
Ano2	25.1243	-1.16024	0.00661	0.0208712	3.13243	TRUE	TRUE	TRUE	FALSE
Ano3	4.40885	-2.185	0.029	0.0716128	2.76875	FALSE	FALSE	TRUE	FALSE
Ano4	5.11779	-1.89187	0.0386	0.0905437	3.08492	TRUE	FALSE	FALSE	FALSE
Ano5	61.2004	-1.49759	1.67e-07	1.79e-06	7.47447	TRUE	TRUE	TRUE	FALSE
Ano8	5.20469	2.81902	0.031	0.0756343	3.45424	FALSE	FALSE	FALSE	FALSE
Anp32b	110.391	0.756842	0.00314486	0.0111326	3.68507	FALSE	FALSE	FALSE	FALSE
Anp32e	60.5436	-0.909505	0.00365	0.0126304	2.8884	FALSE	TRUE	TRUE	FALSE
Antxr2	201.166	1.23396	0.000667	0.00290255	1.67286	FALSE	TRUE	FALSE	FALSE
Antxrl	367.105	-0.411295	0.0192	0.0509145	2.86551	FALSE	FALSE	FALSE	FALSE
Anxa11	94.679	-0.933524	0.000258696	0.00126584	3.04997	TRUE	FALSE	TRUE	FALSE
Anxa2	243.522	0.693949	0.000815	0.00345551	3.82943	FALSE	FALSE	FALSE	FALSE
Anxa3	62.549	-1.68962	3.2e-05	0.000199261	1.67528	TRUE	TRUE	FALSE	FALSE
Anxa5	49.5287	1.16728	0.00102301	0.00420664	4.78908	FALSE	FALSE	FALSE	FALSE
Anxa6	33.0988	0.90598	0.025	0.0633379	4.15181	FALSE	FALSE	FALSE	FALSE
Aoc3	16.3808	1.35985	0.0267	0.0668116	2.73206	TRUE	TRUE	TRUE	FALSE
Ap1b1	242.269	0.843729	0.000256	0.00125384	3.76387	TRUE	TRUE	FALSE	FALSE
Ap1s2	89.4802	-2.69685	1.31e-20	1.03e-18	5.30287	TRUE	TRUE	TRUE	TRUE
Ap2a1	1041.87	0.531754	0.00544	0.0177185	2.19035	FALSE	FALSE	FALSE	FALSE
Ap2m1	107.99	1.31841	1.76e-06	1.49e-05	5.9891	TRUE	TRUE	TRUE	FALSE
Ap2s1	280.006	1.29812	4.39e-09	6.57e-08	6.13745	FALSE	FALSE	FALSE	FALSE
Ap3m1	95.058	-1.39309	9.04e-08	1.03e-06	5.08961	TRUE	FALSE	TRUE	FALSE
Ap3s1	74.2731	-1.21752	0.000299	0.00143471	2.36022	TRUE	TRUE	FALSE	TRUE
Ap3s2	72.2422	1.0034	0.00204	0.00764518	2.93941	TRUE	TRUE	TRUE	FALSE
Ap4e1	64.4793	-0.978052	0.00125	0.00501478	2.70026	TRUE	TRUE	FALSE	FALSE
Ap5b1	78.4811	0.934936	0.00468	0.0156095	2.56937	FALSE	TRUE	FALSE	FALSE
Ap5m1	42.5642	-1.47058	2.29e-05	0.000148196	7.78255	TRUE	FALSE	FALSE	FALSE
Ap5s1	22.8986	1.04627	0.0445	0.101492	2.45145	FALSE	TRUE	FALSE	FALSE
Apba3	91.0533	0.992295	0.0003	0.00144246	4.76681	FALSE	FALSE	FALSE	FALSE
Apbb1	69.857	1.29899	8.28e-05	0.000465344	3.98716	FALSE	FALSE	FALSE	FALSE
Apbb3	41.6543	1.18233	0.00323	0.0113998	3.1833	TRUE	FALSE	TRUE	FALSE
Apc	193.282	-1.13403	1.68e-05	0.000112618	5.29858	TRUE	TRUE	TRUE	FALSE
Apcdd1	22.1979	1.65209	0.00282427	0.010142	3.45625	FALSE	FALSE	FALSE	FALSE
Apeh	84.6165	1.49944	9.98e-06	7.13e-05	3.06745	FALSE	FALSE	FALSE	FALSE
Aph1c	25.3356	-1.09634	0.0453	0.103161	1.77266	FALSE	TRUE	TRUE	FALSE
Apln	30.5191	1.35471	0.00384	0.0131781	3.25142	TRUE	TRUE	TRUE	FALSE
Aplp1	39.4325	0.923042	0.0185	0.0493137	2.97063	FALSE	FALSE	FALSE	FALSE
Aplp2	725.484	0.541885	0.000248	0.00122266	5.89573	FALSE	FALSE	FALSE	FALSE
Naxe	108.728	1.64434	8.87e-07	8.03e-06	2.8371	FALSE	FALSE	FALSE	FALSE
Apoa2	6.37976	5.1217	0.000499	0.00224939	1.86968	FALSE	TRUE	FALSE	FALSE
Apob	9.80325	-2.99621	6.41e-05	0.000369875	3.89584	FALSE	FALSE	FALSE	FALSE
Apobec4	247.366	-0.607264	0.0101	0.0297673	1.53727	FALSE	FALSE	FALSE	FALSE
Apoc1	88.9973	3.16457	0.00705	0.0219995	3.38135	FALSE	FALSE	FALSE	FALSE
Apoe	332.261	2.58994	5.48e-30	1.09e-27	6.88561	FALSE	FALSE	TRUE	FALSE
Apol11a	1.27172	-4.82403	0.0416607	0.0963036	1.62952	FALSE	FALSE	FALSE	FALSE
Apol7c	5.74769	-3.822	0.000788674	0.00334919	2.23259	FALSE	FALSE	TRUE	FALSE
Apoo	5.96164	-2.44991	0.0118	0.0338339	2.04674	FALSE	FALSE	FALSE	FALSE
Coa8	124.951	1.40123	4.41e-09	6.6e-08	16.5413	TRUE	FALSE	TRUE	FALSE
App	306.357	1.55342	1.63e-13	5.19e-12	6.07622	TRUE	TRUE	TRUE	FALSE
Appl1	180.176	-1.66911	1.59e-13	5.08e-12	4.16468	TRUE	TRUE	TRUE	FALSE
Aprt	446.601	1.67871	1.35e-11	3.19e-10	3.24778	FALSE	FALSE	FALSE	FALSE
Aptx	381.199	-0.493689	0.0299	0.0734503	1.39434	TRUE	FALSE	TRUE	FALSE
Aqp11	2410.47	-0.457092	0.021804	0.0564827	1.38097	FALSE	TRUE	TRUE	FALSE
Aqp2	58.4126	-1.38836	3.13e-06	2.52e-05	5.07618	FALSE	TRUE	FALSE	FALSE
Aqp5	117.479	-3.57545	1.63e-19	1.19e-17	4.78934	FALSE	FALSE	FALSE	FALSE
Aqp7	693.722	0.387176	0.0224	0.0577802	2.11568	FALSE	FALSE	TRUE	FALSE
Aqp8	94.0587	1.09308	0.00018	0.000923963	4.14855	FALSE	FALSE	FALSE	FALSE
Aqp9	234.18	-0.890243	1.61e-06	1.37e-05	4.80094	TRUE	FALSE	TRUE	FALSE
Aqr	266.754	-0.64809	0.00028	0.00135519	4.95274	TRUE	FALSE	FALSE	FALSE
Ar	86.8708	-0.760986	0.0145	0.0402467	2.51954	FALSE	TRUE	TRUE	TRUE
Arap2	137.464	-1.52253	3.56e-12	9.52e-11	7.52835	FALSE	FALSE	TRUE	FALSE
Arc	792.492	0.90294	3.79e-07	3.77e-06	3.72825	TRUE	TRUE	TRUE	FALSE
Arcn1	400.979	-0.730704	0.000114	0.000615032	2.74737	TRUE	TRUE	TRUE	FALSE
Arel1	589.238	-0.584141	0.00251	0.00914001	2.40066	FALSE	TRUE	TRUE	FALSE
Arf1	470.104	0.508688	0.00780738	0.0239873	2.68753	FALSE	FALSE	FALSE	FALSE
Arf5	194.898	1.44256	1.45e-07	1.58e-06	4.17113	FALSE	FALSE	FALSE	FALSE
Arf6	466.329	2.99506	6.14e-16	2.71e-14	2.25221	TRUE	FALSE	TRUE	FALSE
Arfgap3	110.719	0.688217	0.0157214	0.0430655	2.23675	TRUE	TRUE	TRUE	TRUE
Arfgap2	284.976	0.461085	0.012	0.0344151	3.41581	FALSE	FALSE	TRUE	FALSE
Arfgap3	416.817	0.371977	0.0488	0.109637	1.93234	TRUE	TRUE	TRUE	TRUE
Arfgef1	651.12	-1.274	2.53e-10	4.8e-09	3.65266	TRUE	TRUE	TRUE	TRUE
Arfgef3	73.71	2.10297	0.000435	0.0019976	1.6017	TRUE	TRUE	FALSE	FALSE
Arfip1	54.9169	-1.35162	1.89e-05	0.000125137	7.28593	TRUE	FALSE	TRUE	FALSE
Arfip2	48.5122	1.14548	0.000913835	0.00381559	7.45959	FALSE	FALSE	TRUE	FALSE
Arglu1	130.813	-0.72981	0.00422	0.0142489	2.67043	FALSE	TRUE	FALSE	FALSE
Arhgap1	90.8629	0.63608	0.0221	0.057114	2.52007	TRUE	TRUE	TRUE	FALSE
Arhgap12	171.491	-0.802087	0.000292505	0.00140953	3.20327	TRUE	TRUE	TRUE	FALSE
Arhgap19	398.274	-0.606359	0.000852451	0.00358733	2.84445	FALSE	FALSE	FALSE	FALSE
Arhgap20	390.513	-1.7199	4.05e-21	3.39e-19	8.00886	TRUE	FALSE	TRUE	FALSE
Arhgap21	139.923	-1.94215	7e-13	2.06e-11	4.47462	FALSE	FALSE	FALSE	FALSE
Arhgap29	1713.19	-1.02358	2e-15	8.17e-14	14.4471	FALSE	TRUE	TRUE	FALSE
Arhgap30	66.2608	-0.946704	0.00112	0.00455467	3.27697	TRUE	TRUE	FALSE	FALSE
Arhgap31	84.7048	0.866072	0.0032474	0.0114399	3.07854	TRUE	TRUE	FALSE	TRUE
Arhgap42	26.571	-1.13908	0.0235	0.0599712	1.26311	FALSE	TRUE	TRUE	FALSE
Arhgap44	73.0551	0.860794	0.00282	0.0101379	5.22637	TRUE	TRUE	TRUE	FALSE
Arhgap5	1001.27	-2.21225	4.4e-20	3.33e-18	3.099	TRUE	TRUE	TRUE	FALSE
Arhgdia	226.204	0.988851	1.09e-05	7.71e-05	4.2947	TRUE	TRUE	FALSE	FALSE
Arhgef1	54.4857	1.54496	2.27e-05	0.000147572	4.78663	TRUE	FALSE	FALSE	FALSE
Arhgef10l	48.6481	1.5555	0.000104677	0.000571932	4.05695	FALSE	FALSE	FALSE	FALSE
Arhgef17	41.394	2.21498	5.21e-05	0.00030766	4.30542	TRUE	TRUE	TRUE	FALSE
Arhgef18	80.2781	0.727066	0.00706063	0.0220169	5.9907	TRUE	TRUE	FALSE	FALSE
Arhgef19	2.1612	3.56397	0.0410577	0.0953708	2.62384	FALSE	TRUE	TRUE	FALSE
Arhgef2	907.47	0.550098	0.00178	0.00679624	2.55968	TRUE	TRUE	TRUE	FALSE
Arhgef25	45.1792	1.11039	0.00421252	0.0142379	2.76482	FALSE	FALSE	FALSE	FALSE
Arhgef26	9.35531	-1.75923	0.00941	0.0279773	3.95102	FALSE	FALSE	FALSE	FALSE
Arhgef3	96.2636	-0.968218	6.91e-05	0.000395727	8.08574	TRUE	TRUE	TRUE	FALSE
Arhgef6	144.212	-0.744066	0.0126985	0.0359617	1.34175	TRUE	TRUE	TRUE	FALSE
Arid1b	94.4309	0.754839	0.0283	0.0702478	1.90989	TRUE	TRUE	TRUE	FALSE
Arid2	1553.86	-1.12544	3.56e-07	3.55e-06	3.88422	TRUE	TRUE	FALSE	FALSE
Arid4a	130.902	-1.34557	4.61e-09	6.84e-08	4.99171	TRUE	FALSE	FALSE	FALSE
Arid4b	245.399	-1.40941	3.53e-12	9.47e-11	4.73783	TRUE	FALSE	TRUE	FALSE
Arih1	911.028	-0.42407	0.0133	0.0374897	1.92367	TRUE	TRUE	TRUE	FALSE
Arl13a	108.673	-0.979034	0.00215445	0.00802869	1.47473	FALSE	FALSE	FALSE	FALSE
Arl13b	185.859	-0.585385	0.0031	0.0109955	3.43682	TRUE	TRUE	TRUE	FALSE
Arl14ep	127.382	-1.15021	1.03e-06	9.18e-06	3.69661	TRUE	FALSE	TRUE	FALSE
Arl16	21.174	1.17445	0.0304	0.0745562	2.33243	TRUE	FALSE	FALSE	FALSE
Arl2	51.3069	1.61255	2.4e-05	0.000154663	5.95125	FALSE	FALSE	FALSE	FALSE
Arl2bp	1239.02	0.621629	0.00491	0.0162611	2.16973	TRUE	TRUE	TRUE	FALSE
Arl3	290.352	0.842228	1.43e-06	1.23e-05	11.4587	FALSE	TRUE	FALSE	FALSE
Arl4a	1463.52	-0.574971	0.00708	0.0220525	1.60924	TRUE	TRUE	FALSE	TRUE
Arl4c	30.7267	1.00201	0.0185	0.049265	3.90003	FALSE	FALSE	TRUE	FALSE
Arl4d	24.3269	1.23042	0.00947	0.0281206	6.41418	FALSE	FALSE	FALSE	FALSE
Arl5b	55.2349	-0.828353	0.00461	0.015406	9.45066	TRUE	TRUE	TRUE	FALSE
Arl6ip1	685.677	-0.829138	1.71e-06	1.45e-05	4.66285	FALSE	FALSE	TRUE	FALSE
Arl6ip5	20.0588	2.02053	0.000901	0.00376445	4.7786	TRUE	TRUE	FALSE	FALSE
Arl8a	47.4593	0.93865	0.0127	0.0360772	2.63381	FALSE	FALSE	TRUE	FALSE
Arl8b	533.667	-1.27446	1.17e-11	2.81e-10	3.985	FALSE	FALSE	TRUE	FALSE
Armc1	60.4013	-0.855186	0.00834	0.025318	3.52415	TRUE	TRUE	TRUE	FALSE
Armc12	963.177	0.703882	0.00454855	0.0152376	2.04918	FALSE	FALSE	FALSE	FALSE
Armc3	651.859	-0.648883	7.84e-05	0.000442806	3.91562	FALSE	TRUE	FALSE	FALSE
Odad2	287.958	-0.712486	0.00203489	0.00764274	1.89972	FALSE	FALSE	FALSE	FALSE
Armc5	45.7522	1.39333	0.0033	0.0115823	2.43488	FALSE	FALSE	FALSE	FALSE
Armc6	21.7868	1.80553	0.00302644	0.0107638	3.34035	TRUE	TRUE	FALSE	FALSE
Armc7	13.8841	2.08888	0.00277	0.00999408	5.98247	TRUE	TRUE	TRUE	FALSE
Armc9	310.378	0.429461	0.0429	0.0986982	1.6992	TRUE	FALSE	TRUE	FALSE
Armcx2	32.2508	1.448	0.00203	0.00761324	3.69577	FALSE	FALSE	TRUE	FALSE
Arpc1b	77.9736	1.68788	9.46e-09	1.33e-07	25.2056	TRUE	TRUE	FALSE	FALSE
Arpc3	59.7808	1.75095	1.5e-06	1.28e-05	6.02259	FALSE	TRUE	TRUE	FALSE
Arpc4	75.8121	1.32012	1.97e-05	0.000130058	4.96331	FALSE	TRUE	TRUE	FALSE
Arpc5l	231.468	0.699764	0.00059	0.00260764	3.87399	TRUE	TRUE	FALSE	FALSE
Arrb1	97.3131	-0.752463	0.00402	0.0136881	3.89102	TRUE	TRUE	TRUE	FALSE
Arrb2	17.4435	2.72815	0.000213908	0.00107677	4.25999	FALSE	FALSE	FALSE	FALSE
Arrdc3	333.795	-1.20671	2.56e-10	4.83e-09	5.24279	TRUE	TRUE	TRUE	TRUE
Arrdc5	408.403	0.927355	1.71e-06	1.45e-05	4.74532	FALSE	FALSE	FALSE	FALSE
Arsa	721.254	0.557779	0.00230145	0.00849653	2.61195	FALSE	TRUE	TRUE	FALSE
Arsk	52.7373	-1.35826	4.42e-05	0.000266288	3.39688	TRUE	FALSE	FALSE	FALSE
Art5	287.721	0.650148	0.0195	0.0515266	1.41737	FALSE	FALSE	FALSE	FALSE
Arvcf	28.5187	0.975578	0.0247	0.0626599	4.47161	FALSE	FALSE	TRUE	FALSE
Arxes2	17.8891	-1.96054	0.00177	0.00675933	1.76226	FALSE	TRUE	FALSE	FALSE
Asah1	111.082	-0.887942	0.00127365	0.00508871	2.80365	FALSE	FALSE	FALSE	FALSE
Asb1	516.327	-0.666324	0.000940016	0.00391411	2.28999	FALSE	FALSE	TRUE	FALSE
Asb14	19.3429	-1.37017	0.00623381	0.01988	2.61964	FALSE	TRUE	FALSE	FALSE
Asb15	116.383	-0.822187	0.026448	0.0663433	1.03771	FALSE	TRUE	FALSE	FALSE
Asb17	698.877	-0.824755	3.94e-05	0.000240331	2.61076	FALSE	TRUE	FALSE	FALSE
Asb4	200.251	-1.45593	3.62e-06	2.86e-05	2.82629	TRUE	FALSE	TRUE	FALSE
Asb6	43.8815	0.749952	0.0461	0.104443	2.36367	FALSE	FALSE	FALSE	FALSE
Asb8	382.16	0.743358	2.68e-06	2.19e-05	15.8573	TRUE	FALSE	FALSE	FALSE
Ascc3	549.254	-1.50221	3.31e-13	1.02e-11	3.47798	FALSE	TRUE	FALSE	FALSE
Asf1b	146.724	0.595275	0.0341	0.0817961	1.77826	FALSE	FALSE	FALSE	FALSE
Ash1l	409.592	-1.17487	1.57e-08	2.12e-07	7.44396	TRUE	TRUE	FALSE	TRUE
Asic1	6.26781	2.35743	0.0367	0.086773	3.12479	FALSE	FALSE	TRUE	FALSE
Adsl	45.5824	1.61889	2.81e-05	0.000177754	5.15572	FALSE	TRUE	TRUE	FALSE
Get3	316.235	1.86409	1.77e-14	6.43e-13	4.54067	FALSE	FALSE	FALSE	FALSE
Asnsd1	1172.52	-1.03439	6.88e-08	8.03e-07	2.94079	FALSE	FALSE	FALSE	FALSE
Aspa	16.015	-1.74904	0.0033587	0.0117681	1.70989	TRUE	TRUE	TRUE	FALSE
Aspdh	7.61893	-1.88613	0.049274	0.110389	2.28154	FALSE	FALSE	FALSE	FALSE
Aspm	171.775	-1.54573	1.18e-09	1.98e-08	4.19632	TRUE	TRUE	FALSE	FALSE
Aspn	26.5213	-2.86262	3.02e-07	3.08e-06	2.01262	FALSE	FALSE	FALSE	FALSE
Aspscr1	833.623	1.73623	5.89e-29	1.1e-26	14.1491	FALSE	FALSE	FALSE	FALSE
Ints13	418.903	-0.632554	0.000124	0.00066347	4.22747	FALSE	FALSE	FALSE	FALSE
Asxl2	282.732	-0.820703	3.62e-06	2.86e-05	5.81803	TRUE	TRUE	TRUE	FALSE
Asz1	91.6242	-1.04181	0.00343	0.0119643	1.49407	TRUE	FALSE	FALSE	FALSE
Atad1	562.067	-1.28978	2.19e-08	2.87e-07	2.51547	TRUE	TRUE	TRUE	FALSE
Atad2	235.29	-1.00806	1.04e-06	9.28e-06	3.59455	TRUE	TRUE	FALSE	FALSE
Atad2b	112.244	-0.987521	0.000552	0.00245978	2.23186	TRUE	TRUE	FALSE	FALSE
Atad5	53.6329	-0.856859	0.0325132	0.0787345	1.77628	TRUE	FALSE	TRUE	FALSE
Ate1	222.452	-0.567441	0.00216	0.00805409	4.81217	TRUE	TRUE	FALSE	FALSE
Atf2	411.571	-0.505761	0.000925	0.003857	7.15608	TRUE	TRUE	TRUE	FALSE
Atf5	47.4739	0.863189	0.0295767	0.0728471	1.97413	TRUE	TRUE	FALSE	FALSE
Atf6	136.944	-0.447577	0.0361514	0.0858176	3.27948	TRUE	TRUE	TRUE	FALSE
Atf6b	93.0841	1.73403	1.59e-08	2.14e-07	7.01585	TRUE	TRUE	FALSE	FALSE
Atf5	178.298	-1.48455	6.78e-05	0.000388905	1.7985	TRUE	TRUE	FALSE	FALSE
Atf7ip2	154.999	-2.37966	2.69e-28	4.66e-26	22.9357	TRUE	TRUE	TRUE	TRUE
Atg12	257.011	-1.17671	3.16e-10	5.87e-09	12.5856	FALSE	TRUE	FALSE	FALSE
Atg3	95.221	-0.693538	0.012	0.0343326	2.07378	TRUE	TRUE	FALSE	FALSE
Atg4c	106.309	-0.910134	0.000129	0.00068597	3.97924	TRUE	TRUE	TRUE	FALSE
Atg4d	103.115	1.82593	6.57e-11	1.38e-09	8.55855	FALSE	FALSE	TRUE	FALSE
Atg7	232.369	0.842855	1.67e-05	0.000112184	5.43539	TRUE	TRUE	TRUE	FALSE
Atl2	237.602	-0.799808	3.44e-05	0.000213073	4.42934	TRUE	FALSE	FALSE	FALSE
Atm	147.075	-1.37065	6.21e-11	1.31e-09	8.54809	TRUE	TRUE	TRUE	FALSE
Atn1	67.9989	0.732677	0.0187	0.0497004	2.66988	FALSE	FALSE	TRUE	FALSE
Atoh8	461.916	0.849395	1.49e-05	0.000101429	4.5187	FALSE	FALSE	TRUE	FALSE
Atox1	99.5254	1.64955	1.34e-06	1.16e-05	3.38174	FALSE	FALSE	FALSE	FALSE
Atp10a	322.655	-0.673335	0.00173	0.00663312	2.97734	FALSE	TRUE	FALSE	FALSE
Atp11b	281.968	-1.33889	4.04e-10	7.37e-09	5.12943	TRUE	TRUE	TRUE	FALSE
Atp11c	88.6833	-2.04221	1.19e-14	4.4e-13	6.97888	TRUE	TRUE	FALSE	FALSE
Atp13a1	140.261	0.770161	0.00936	0.0278394	2.15947	FALSE	FALSE	FALSE	FALSE
Atp13a2	104.967	1.45371	2.1e-06	1.76e-05	4.1977	FALSE	FALSE	TRUE	FALSE
Atp13a3	165.484	-1.25592	8.83e-10	1.5e-08	8.04443	FALSE	TRUE	FALSE	FALSE
Atp13a4	17.982	-1.54838	0.00336	0.0117602	3.2109	FALSE	FALSE	FALSE	FALSE
Atp1a1	437.967	1.90355	3.14e-28	5.38e-26	14.1051	FALSE	FALSE	TRUE	FALSE
Atp1a2	179.97	0.508848	0.0437	0.100035	1.8583	TRUE	TRUE	TRUE	FALSE
Atp1a4	2790.32	-0.436226	0.0105	0.0307009	2.42065	FALSE	TRUE	TRUE	FALSE
Atp1b1	102.72	0.843964	0.00345779	0.0120571	2.89366	FALSE	FALSE	FALSE	FALSE
Atp1b3	1066.3	0.405627	0.0155	0.0426422	2.46533	FALSE	FALSE	TRUE	FALSE
Atp2a2	566.269	0.628503	0.000176719	0.000909219	3.99012	FALSE	TRUE	TRUE	FALSE
Atp2b3	47.6391	-0.948918	0.00581	0.0187254	2.24401	FALSE	TRUE	TRUE	FALSE
Atp2c1	159.091	-1.17024	1.22e-07	1.36e-06	6.94982	TRUE	TRUE	TRUE	FALSE
Atp5a1	836.165	1.49786	9.63e-27	1.43e-24	26.8104	TRUE	FALSE	TRUE	FALSE
Atp5b	1694.77	0.742635	3.65e-08	4.54e-07	9.01653	FALSE	FALSE	FALSE	FALSE
Atp5d	289.132	2.64185	1.48e-35	4.57e-33	13.7158	FALSE	FALSE	TRUE	FALSE
Atp5e	296.817	2.17588	6.18e-13	1.83e-11	2.57951	FALSE	FALSE	FALSE	FALSE
Atp5pb	289.8	-0.505424	0.0275	0.0685105	1.55865	TRUE	FALSE	FALSE	FALSE
Atp5g1	161.949	0.440169	0.0446	0.101867	2.58575	TRUE	TRUE	TRUE	FALSE
Atp5g2	42.8248	1.423	0.000423473	0.00195309	3.64309	FALSE	FALSE	FALSE	FALSE
Atp5g3	141.041	1.8101	2.5e-10	4.74e-09	7.0306	FALSE	FALSE	FALSE	FALSE
Atp5h	269.907	0.813548	0.00361	0.012525	1.75305	FALSE	FALSE	FALSE	FALSE
Atp5j	265.484	-0.737663	0.000263295	0.00128444	2.91987	FALSE	TRUE	FALSE	FALSE
Atp5j2	174.352	0.803904	0.0119	0.0341085	1.73024	FALSE	FALSE	FALSE	FALSE
Atp5o	401.007	0.617312	0.0195	0.0514625	1.67009	FALSE	FALSE	FALSE	FALSE
Dmac2l	116.845	-0.787998	0.00101	0.00415566	4.08754	TRUE	TRUE	FALSE	FALSE
Dmac2	129.696	0.855708	0.000579	0.00256275	3.75918	FALSE	FALSE	FALSE	FALSE
Atp6ap1	90.4726	0.855149	0.00271	0.0097882	3.13036	FALSE	FALSE	FALSE	FALSE
Atp6v0a1	106.696	0.944242	0.0059	0.0189869	2.02937	TRUE	TRUE	FALSE	FALSE
Atp6v0a2	127.153	0.446667	0.0430605	0.0989726	5.41279	FALSE	TRUE	TRUE	FALSE
Atp6v0b	234.163	1.1499	2.26e-06	1.88e-05	2.98202	FALSE	FALSE	FALSE	FALSE
Atp6v0d1	150.763	1.41763	9.55e-09	1.34e-07	5.53437	TRUE	TRUE	FALSE	FALSE
Atp6v1a	382.216	-0.681324	8.58e-05	0.000479909	3.70622	FALSE	FALSE	TRUE	FALSE
Atp6v1d	373.163	-0.581531	0.00625481	0.0199318	1.70439	FALSE	FALSE	FALSE	FALSE
Atp6v1e2	260.679	0.959069	6.3e-07	5.93e-06	6.18141	FALSE	FALSE	FALSE	FALSE
Atp6v1f	149.76	1.29214	7.95e-07	7.29e-06	5.20818	FALSE	FALSE	FALSE	FALSE
Atp6v1h	254.098	-0.642206	0.00111	0.00450649	3.00585	TRUE	FALSE	FALSE	FALSE
Atp7a	92.1717	-0.568823	0.0243	0.0617776	4.05438	FALSE	FALSE	TRUE	FALSE
Atp8a1	49.8403	-1.45136	3.31e-06	2.65e-05	13.1254	TRUE	TRUE	FALSE	FALSE
Atp8a2	283.896	-0.772536	2.95e-05	0.000185236	4.63029	TRUE	TRUE	FALSE	FALSE
Atp8b3	7646.61	0.405136	0.0324937	0.078698	1.59895	FALSE	FALSE	FALSE	FALSE
Atp8b5	228.587	-0.752892	3.61e-05	0.000222291	6.54035	TRUE	FALSE	FALSE	FALSE
Atp9a	316.916	0.981892	0.000135432	0.000717942	3.53531	FALSE	TRUE	FALSE	FALSE
Atp9b	612.443	-0.280416	0.043786	0.100285	6.15869	TRUE	TRUE	TRUE	FALSE
Atpaf1	24.8105	-0.877647	0.0497	0.111076	1.60679	FALSE	TRUE	TRUE	FALSE
Atr	2296	-1.7678	3.79e-19	2.57e-17	4.14079	TRUE	FALSE	FALSE	FALSE
Atraid	78.077	0.923803	0.00219	0.00814807	3.46632	FALSE	FALSE	FALSE	FALSE
Atrip	48.7416	0.75069	0.0228757	0.058723	6.67523	FALSE	FALSE	FALSE	FALSE
Atrnl1	108.013	-0.797774	0.00725	0.0225449	1.84159	FALSE	FALSE	TRUE	FALSE
Atrx	101.392	-1.60706	2.03e-07	2.15e-06	2.72608	TRUE	TRUE	FALSE	FALSE
Atxn2l	2151.44	0.40435	0.0375	0.0883315	1.49793	FALSE	FALSE	FALSE	FALSE
Atxn3	455.627	-0.843964	0.000253415	0.0012446	1.88823	TRUE	TRUE	TRUE	FALSE
Atxn7l3b	1521.75	-0.602169	0.00105774	0.00432892	2.32874	TRUE	TRUE	TRUE	FALSE
Nkapd1	64.2645	-0.942097	0.000728	0.00313196	10.8628	TRUE	FALSE	TRUE	FALSE
AU021092	69.9941	1.34105	6.33e-05	0.000365728	4.46352	FALSE	FALSE	FALSE	FALSE
AU022252	54.4065	1.6455	6.28e-06	4.69e-05	4.91695	FALSE	FALSE	TRUE	FALSE
AU022754	3.07494	-5.07673	0.00167	0.00644812	14.342	FALSE	FALSE	FALSE	FALSE
AU040320	314.168	0.650746	0.00326	0.0114798	2.4275	TRUE	FALSE	TRUE	FALSE
AU040972	3.17313	-5.12482	0.00418	0.0141483	1.54561	FALSE	FALSE	FALSE	FALSE
AU041133	10.3383	-2.05036	0.00458287	0.0153328	1.78248	FALSE	TRUE	FALSE	FALSE
Aup1	308.052	0.762539	0.00214	0.00798314	2.74473	FALSE	FALSE	FALSE	FALSE
Aurka	523.577	0.725727	8.03e-06	5.86e-05	6.1819	TRUE	FALSE	FALSE	FALSE
Avl9	125.905	-0.830529	0.00101559	0.00418277	2.98546	TRUE	TRUE	TRUE	TRUE
Avpi1	43.9319	3.09414	7.91e-09	1.13e-07	3.37824	FALSE	TRUE	TRUE	FALSE
Avpr1b	122.176	-8.95993	7.63e-25	9.43e-23	7.00346	TRUE	TRUE	TRUE	FALSE
AW046200	31.2008	-1.94176	2.87e-05	0.000180905	2.09371	FALSE	FALSE	FALSE	FALSE
AW146154	8.66268	-1.81961	0.0143	0.0396927	1.90599	TRUE	TRUE	TRUE	FALSE
Rimoc1	207.079	-3.14044	8.91e-48	4.9e-45	8.41086	TRUE	FALSE	FALSE	FALSE
AW554918	439.11	-0.85036	1.88e-05	0.000124711	3.01087	TRUE	TRUE	TRUE	FALSE
Awat2	13.9654	-1.60527	0.00499	0.0164742	2.58006	FALSE	FALSE	FALSE	FALSE
Axin1	163.741	1.38629	6.6e-10	1.16e-08	11.2628	FALSE	FALSE	FALSE	FALSE
Axin2	1709.1	-5.89731	7.29e-12	1.81e-10	15.3954	FALSE	FALSE	FALSE	FALSE
Axl	212.335	0.551251	0.0303	0.0744034	1.77017	TRUE	TRUE	TRUE	FALSE
AY512931	7.79621	-1.69382	0.0254	0.064215	3.02223	FALSE	FALSE	FALSE	FALSE
AY702102	205.442	-1.22691	2.13e-05	0.000139258	1.87929	FALSE	FALSE	FALSE	FALSE
AY702103	511.805	-0.617621	0.00298	0.0106175	2.31132	FALSE	FALSE	FALSE	FALSE
Azin1	461.883	-1.56386	5.97e-18	3.36e-16	15.5419	TRUE	FALSE	TRUE	FALSE
Azin2	1679.07	2.9687	1.84e-33	4.7e-31	4.19249	FALSE	FALSE	TRUE	FALSE
Iftap	326.051	-1.28661	6.28e-05	0.000363346	1.48647	FALSE	FALSE	TRUE	FALSE
B230209E15Rik	1.29945	-4.8488	0.0237	0.0604515	3.94195	FALSE	FALSE	FALSE	FALSE
B230307C23Rik	8.06529	-1.56917	0.0457	0.10377	2.27617	FALSE	FALSE	FALSE	FALSE
B230354K17Rik	31.7078	-0.953929	0.0179173	0.0481229	2.2985	FALSE	FALSE	FALSE	FALSE
B2m	125.761	0.97549	0.00270246	0.0097625	2.45514	FALSE	FALSE	FALSE	FALSE
B3galnt2	69.1674	-0.790964	0.00701521	0.0219167	2.97378	TRUE	TRUE	FALSE	FALSE
B3galt1	9.32005	-1.89393	0.0118	0.0337253	2.88431	TRUE	TRUE	TRUE	FALSE
B3galt2	34.5203	-4.47726	5.51e-18	3.13e-16	16.0295	TRUE	TRUE	FALSE	FALSE
B3galt4	30.1175	1.19329	0.0203685	0.0533653	2.21254	FALSE	FALSE	TRUE	FALSE
B3gat2	10.4719	-2.21558	0.002	0.00751651	2.85339	TRUE	FALSE	TRUE	FALSE
B3gat3	44.5355	1.80269	7.83e-06	5.73e-05	5.65088	FALSE	FALSE	FALSE	FALSE
B3gnt8	7.40152	3.37862	0.00661	0.0208675	3.51503	TRUE	FALSE	FALSE	FALSE
B430319G15Rik	4.25326	-3.33035	0.0139508	0.0389136	1.33779	FALSE	FALSE	FALSE	FALSE
B4galnt1	137.742	1.21636	6.53e-07	6.11e-06	6.05033	FALSE	FALSE	TRUE	FALSE
B4galnt3	35.6069	1.03786	0.0124	0.0353257	2.96091	FALSE	FALSE	TRUE	FALSE
B4galt2	125.319	0.86772	0.000408839	0.00189425	4.46588	FALSE	FALSE	TRUE	FALSE
B4galt3	53.8315	0.788961	0.0235	0.0600168	2.45737	FALSE	FALSE	FALSE	FALSE
B4galt5	59.608	0.777178	0.0401027	0.0934626	1.79816	FALSE	FALSE	TRUE	FALSE
B4galt7	32.0163	2.74263	1.29e-05	8.95e-05	4.1977	FALSE	FALSE	TRUE	FALSE
Bmt2	51.9706	-1.55191	1.99e-06	1.67e-05	3.62571	TRUE	TRUE	FALSE	FALSE
B9d1	295.084	1.062	7.08e-05	0.000404385	2.73641	FALSE	FALSE	FALSE	FALSE
B9d2	26.2107	1.59126	0.00547	0.0178008	2.15416	TRUE	TRUE	TRUE	FALSE
Babam1	147.593	1.10395	2.53e-06	2.08e-05	6.64779	FALSE	FALSE	FALSE	FALSE
Bace2	4.15413	3.42153	0.0204	0.053408	3.46972	TRUE	TRUE	TRUE	FALSE
Bad	147.141	1.04839	1.62e-05	0.000109379	4.06088	FALSE	TRUE	FALSE	FALSE
Bag1	1044.46	0.671667	2.34e-05	0.00015153	4.88564	FALSE	FALSE	FALSE	FALSE
Bag2	29.1051	2.12695	0.000325476	0.00154748	3.97269	TRUE	TRUE	FALSE	TRUE
Bag3	114.595	0.655734	0.0159	0.0436017	2.39947	FALSE	FALSE	FALSE	FALSE
Bag5	1585.73	0.453708	0.000339	0.00160695	7.10838	TRUE	TRUE	FALSE	FALSE
Bag6	3514.38	1.31481	4.08e-18	2.38e-16	6.77018	FALSE	FALSE	FALSE	FALSE
Bahd1	109.321	0.793682	0.00669	0.0210895	2.27751	TRUE	TRUE	TRUE	FALSE
Baiap2	505.031	1.00742	2.09e-09	3.32e-08	7.36058	FALSE	FALSE	TRUE	FALSE
Baiap3	6.1856	4.03567	0.00437074	0.014707	2.70599	FALSE	FALSE	TRUE	FALSE
Bak1	42.2234	1.48553	0.000307	0.00147137	4.30214	TRUE	TRUE	FALSE	FALSE
Banf1	161.205	0.653965	0.0124	0.0352241	2.15524	TRUE	FALSE	FALSE	FALSE
Bap1	466.372	0.715296	2.84e-05	0.000179285	5.76363	FALSE	FALSE	FALSE	FALSE
Barhl2	5.68582	-2.58867	0.00509	0.0167376	2.53144	FALSE	FALSE	FALSE	FALSE
Basp1	132.648	1.17764	4.16e-06	3.25e-05	5.05231	TRUE	FALSE	TRUE	FALSE
Bax	26.3521	1.5234	0.00402	0.0136803	3.01411	FALSE	FALSE	FALSE	FALSE
Baz1a	1012.97	-0.919867	1.29e-09	2.13e-08	7.70697	TRUE	FALSE	FALSE	FALSE
Baz2a	1602.07	-0.550515	0.0107	0.0312162	2.15097	TRUE	TRUE	FALSE	TRUE
Baz2b	335.666	-1.30483	7.02e-10	1.22e-08	5.37606	TRUE	FALSE	FALSE	FALSE
BB014433	780.55	0.566798	6.97e-05	0.000398789	6.91259	FALSE	FALSE	FALSE	FALSE
BB019430	29.9468	-1.48237	0.0036617	0.0126492	1.60613	TRUE	FALSE	FALSE	FALSE
BB031773	4.25084	-2.74977	0.0146	0.0403981	1.74955	FALSE	FALSE	FALSE	FALSE
Bbc3	8.23361	2.87947	0.00559172	0.0181661	6.31865	FALSE	FALSE	TRUE	FALSE
Bbip1	188.084	-0.811592	0.00167	0.00644835	1.84693	FALSE	FALSE	TRUE	FALSE
Bbs10	83.199	-0.588788	0.0369	0.0872848	1.7898	FALSE	TRUE	FALSE	FALSE
Bbs12	17.8168	-1.28008	0.0242379	0.0616536	1.68306	TRUE	TRUE	FALSE	FALSE
Bbs4	99.2348	-0.770983	0.0038976	0.0133473	2.60766	FALSE	FALSE	TRUE	FALSE
Bbs5	271.646	-1.28774	4.31e-06	3.35e-05	1.89695	TRUE	FALSE	FALSE	FALSE
Bbs7	272.811	-0.856055	3.82e-07	3.79e-06	9.13497	TRUE	TRUE	FALSE	FALSE
Bbx	1048.38	-0.773404	3.83e-06	3.02e-05	5.15154	TRUE	TRUE	TRUE	FALSE
BC002163	12.437	1.72103	0.0221431	0.0572062	2.7293	FALSE	FALSE	FALSE	FALSE
BC003331	50.1628	-1.14664	0.00131	0.0052004	1.94788	FALSE	TRUE	FALSE	FALSE
BC005537	786.63	-1.2018	1.08e-12	3.07e-11	8.21466	FALSE	TRUE	FALSE	FALSE
BC005561	259.654	-2.49798	2.17e-35	6.47e-33	7.89023	FALSE	FALSE	FALSE	FALSE
BC005624	43.9269	1.28506	0.000455128	0.00207434	7.80807	FALSE	TRUE	FALSE	FALSE
BC022687	375.83	1.29446	2.14e-12	5.81e-11	10.5719	FALSE	TRUE	FALSE	FALSE
BC025920	3.75896	-2.37604	0.0432	0.0991281	1.25421	TRUE	FALSE	FALSE	FALSE
BC029214	58.133	1.33403	0.00018	0.000923142	3.28154	FALSE	FALSE	FALSE	FALSE
BC029722	31.5154	1.12094	0.00727	0.0225951	6.11314	FALSE	FALSE	TRUE	FALSE
BC030336	75.6967	-1.31518	1.66e-06	1.41e-05	5.50727	FALSE	FALSE	FALSE	FALSE
BC030499	53.9268	-0.911469	0.00338	0.0118444	5.37428	FALSE	FALSE	FALSE	FALSE
BC037032	10.1753	-1.6357	0.0217401	0.0563494	2.02959	FALSE	FALSE	FALSE	FALSE
BC037034	999.687	-3.33976	1.23e-87	2.23e-84	8.61128	FALSE	FALSE	FALSE	FALSE
BC037704	53.1002	1.14321	0.00695616	0.0217696	2.23421	FALSE	FALSE	FALSE	FALSE
BC048502	225.803	-1.04959	0.000400932	0.00186119	1.66794	FALSE	FALSE	FALSE	FALSE
BC048507	123.825	0.971627	6.56e-05	0.000377669	5.45819	TRUE	FALSE	FALSE	FALSE
BC048562	95.4294	0.676058	0.0328	0.0794411	1.7554	FALSE	FALSE	FALSE	FALSE
BC049730	270.522	-0.746415	8.01e-06	5.84e-05	10.4159	FALSE	FALSE	FALSE	FALSE
BC049762	1060.21	0.601725	0.00952466	0.0282644	1.40923	TRUE	FALSE	FALSE	FALSE
BC051142	2256.09	-0.418378	0.000486	0.00219754	9.76797	FALSE	FALSE	TRUE	FALSE
BC051628	803.212	1.28196	6.16e-08	7.27e-07	3.03767	FALSE	FALSE	FALSE	FALSE
BC055324	78.9087	-1.04887	0.000225	0.00112385	2.88634	TRUE	FALSE	FALSE	FALSE
BC061237	208.404	-1.18134	0.000297	0.00142776	1.68772	FALSE	FALSE	FALSE	FALSE
BC065397	9.10919	-1.52604	0.0359	0.0853502	1.44117	TRUE	FALSE	FALSE	FALSE
BC089491	703.899	0.505028	0.00053	0.00236882	6.31359	FALSE	FALSE	FALSE	FALSE
BC100451	1427.93	0.361625	0.0202	0.0529037	2.24232	FALSE	FALSE	FALSE	FALSE
Bcam	21.1155	2.58562	0.000201	0.00101896	2.9463	TRUE	TRUE	FALSE	FALSE
Bcap29	983.016	-1.85576	4.9e-21	4.03e-19	4.96751	FALSE	TRUE	FALSE	FALSE
Bcar1	130.474	1.02101	0.000268	0.00130312	3.19124	TRUE	FALSE	FALSE	FALSE
Bcar3	43.2674	1.12458	0.003117	0.0110534	3.53149	FALSE	FALSE	TRUE	FALSE
Bcas3os1	3.01051	-5.06436	0.00777	0.0238999	0.940148	FALSE	FALSE	FALSE	FALSE
Bcat2	144.019	2.42008	1.15e-15	4.84e-14	8.1206	TRUE	TRUE	FALSE	FALSE
Bckdha	231.909	1.00946	1.7e-05	0.000113952	4.31443	FALSE	FALSE	TRUE	FALSE
Bckdhb	18.7485	2.20781	0.000585004	0.00258835	3.84665	FALSE	TRUE	FALSE	FALSE
Bckdk	30.0522	1.85696	0.000146927	0.000771033	5.6047	TRUE	TRUE	FALSE	FALSE
Bcl11a	75.7112	-1.15138	0.00019774	0.00100485	2.80945	TRUE	FALSE	TRUE	FALSE
Bcl2l10	2.88049	3.97305	0.0160754	0.043916	2.72193	TRUE	FALSE	FALSE	FALSE
Bcl7b	88.9803	1.57938	3.07e-08	3.88e-07	11.1392	FALSE	FALSE	FALSE	FALSE
Bcl7c	170.049	2.48475	3.8e-24	4.32e-22	16.0191	TRUE	TRUE	TRUE	FALSE
Bcl9l	47.8703	1.93377	1.05e-05	7.45e-05	3.16322	FALSE	FALSE	TRUE	FALSE
Bclaf1	394.886	-1.23727	7.88e-12	1.94e-10	6.58825	TRUE	FALSE	TRUE	FALSE
Bdh1	36.6611	1.4385	0.00128	0.00511243	2.91138	FALSE	FALSE	TRUE	FALSE
Bdp1	138.185	-1.56713	2.49e-11	5.6e-10	4.55578	TRUE	TRUE	FALSE	FALSE
Becn1	208.37	0.446401	0.0479	0.107873	1.9448	FALSE	TRUE	FALSE	FALSE
Bend3	47.8054	1.05966	0.0123	0.0349538	2.13691	TRUE	TRUE	TRUE	FALSE
Bet1	75.2423	-1.50385	5.63e-06	4.27e-05	2.35805	FALSE	TRUE	TRUE	FALSE
Bex1	26.2605	1.48893	0.00259819	0.00942766	3.85672	FALSE	FALSE	FALSE	FALSE
Bhmt	241.535	1.99943	3.2e-09	4.9e-08	4.8491	FALSE	FALSE	TRUE	FALSE
Bicd1	24.8057	-1.30729	0.00278	0.0100007	2.90537	TRUE	FALSE	TRUE	FALSE
Bicd2	155.304	-0.633525	0.0305488	0.0748255	1.40347	FALSE	FALSE	TRUE	FALSE
Bid	14.782	1.2798	0.032	0.0776347	9.51331	FALSE	TRUE	FALSE	FALSE
Bin2	57.2082	1.30958	0.000275	0.00133322	3.83155	FALSE	TRUE	FALSE	FALSE
Birc3	394.598	-1.33155	7.83e-16	3.41e-14	17.1866	FALSE	TRUE	FALSE	FALSE
Birc6	590.704	-0.994085	6.5e-08	7.62e-07	4.46511	FALSE	FALSE	FALSE	FALSE
Blm	125.979	-0.548275	0.018	0.0482296	2.64577	TRUE	FALSE	FALSE	FALSE
Bloc1s1	80.5193	1.67807	9.86e-06	7.06e-05	3.64528	FALSE	FALSE	FALSE	FALSE
Bloc1s2	63.0363	0.842097	0.00596	0.0191371	4.56327	TRUE	TRUE	FALSE	FALSE
Bloc1s3	18.2105	1.25632	0.0292	0.0720269	2.70918	TRUE	FALSE	TRUE	FALSE
Bloc1s4	48.0409	0.815537	0.0253	0.0638765	2.563	FALSE	FALSE	FALSE	FALSE
Blvra	29.6132	1.11549	0.0119145	0.0340707	3.83967	FALSE	FALSE	FALSE	FALSE
Blzf1	184.294	-0.839745	0.00150212	0.00586859	1.77875	TRUE	TRUE	TRUE	FALSE
Bmi1	421.294	-0.463924	0.0317	0.0771476	1.60034	TRUE	TRUE	TRUE	FALSE
Bmp3	7.26036	-2.96977	0.00169	0.00653257	3.08152	TRUE	TRUE	TRUE	TRUE
Bmp6	8.11659	1.94012	0.0306	0.0748787	3.39533	FALSE	FALSE	TRUE	FALSE
Bmp7	1083.73	3.37233	3.39e-28	5.76e-26	3.65021	FALSE	FALSE	FALSE	FALSE
Bmper	17.2229	1.34026	0.0304	0.0746067	2.08103	TRUE	FALSE	TRUE	FALSE
Bmpr1a	137.273	-0.749917	0.00116834	0.00472301	3.6598	TRUE	TRUE	TRUE	FALSE
Bmpr2	147.296	-1.57473	1.22e-10	2.44e-09	6.93074	FALSE	TRUE	TRUE	FALSE
Bms1	544.055	-0.454084	0.0396878	0.0926746	1.42745	FALSE	FALSE	FALSE	FALSE
Bmyc	9.51052	2.58026	0.00815	0.0248347	3.77888	FALSE	FALSE	FALSE	FALSE
Bnc2	86.564	0.843165	0.00569	0.0184134	2.47142	FALSE	TRUE	TRUE	FALSE
Bnip1	65.3517	0.82147	0.0372	0.0877889	1.61239	FALSE	FALSE	TRUE	FALSE
Bnip3l	117.581	-0.744824	0.0116	0.0333813	2.30325	TRUE	TRUE	TRUE	FALSE
Bod1	178.854	1.53297	2.99e-09	4.62e-08	4.41386	FALSE	FALSE	FALSE	FALSE
Bod1l	328.263	-0.907652	1.08e-05	7.66e-05	3.8691	TRUE	FALSE	FALSE	FALSE
Bola1	62.2492	1.37764	4.65e-05	0.000277895	4.72412	TRUE	FALSE	TRUE	FALSE
Bola2	53.2602	0.807093	0.027275	0.0680451	2.03193	FALSE	FALSE	FALSE	FALSE
Boll	641.699	-1.11225	2.48e-12	6.71e-11	6.9185	FALSE	FALSE	TRUE	FALSE
Bop1	181.836	0.923747	9.44e-06	6.79e-05	6.82572	TRUE	FALSE	FALSE	FALSE
Bpi	186.891	0.475633	0.0194712	0.0514522	3.48695	FALSE	FALSE	TRUE	FALSE
Bpifa3	330.374	0.905716	2.14e-06	1.79e-05	4.76723	FALSE	FALSE	FALSE	FALSE
Bpifb9a	2.38212	-4.71381	0.00613	0.0195995	5.33717	FALSE	FALSE	FALSE	FALSE
Bpifb9b	4.65765	-4.14609	0.00161857	0.00625812	1.87393	FALSE	FALSE	FALSE	FALSE
Braf	341.516	-1.00582	7.29e-08	8.47e-07	6.07456	TRUE	TRUE	TRUE	FALSE
Brca1	126.186	-1.40744	1.59e-09	2.59e-08	5.39429	TRUE	TRUE	TRUE	FALSE
Brca2	439.272	-1.36184	1.14e-09	1.9e-08	4.83011	FALSE	TRUE	FALSE	FALSE
Brcc3	19.8039	-1.82198	0.00031	0.00148373	2.73623	TRUE	TRUE	TRUE	TRUE
Brd1	248.623	0.82565	0.000313	0.00149467	3.38924	FALSE	TRUE	TRUE	FALSE
Brd2	1377.67	0.531208	0.000129	0.000685477	5.17029	FALSE	FALSE	TRUE	FALSE
Brd4	122.341	0.923577	0.00210357	0.00787138	2.29528	FALSE	TRUE	FALSE	FALSE
Brd8	230.058	-0.540402	0.00729	0.0226275	2.31569	TRUE	TRUE	FALSE	FALSE
Brd9	171.714	-0.943089	1.64e-05	0.000110593	3.67972	FALSE	TRUE	TRUE	FALSE
Brdt	938.359	-0.539806	0.00242	0.00887143	2.25038	TRUE	TRUE	TRUE	FALSE
Zfp36l2	76.6595	1.31822	5.41e-05	0.000318323	3.5141	FALSE	FALSE	TRUE	FALSE
Bri3	120.198	1.50523	1.56e-06	1.34e-05	2.78104	TRUE	FALSE	FALSE	FALSE
Bri3bp	139.166	1.28414	3.29e-08	4.13e-07	8.44687	TRUE	TRUE	TRUE	FALSE
Brix1	114.574	-1.11908	4.61e-05	0.000275939	3.8812	FALSE	TRUE	TRUE	FALSE
Brms1	546.313	1.02108	1.27e-05	8.85e-05	3.29453	FALSE	FALSE	FALSE	FALSE
Brms1l	59.6863	-1.13711	0.000241	0.0011914	3.33235	TRUE	TRUE	TRUE	FALSE
Brwd1	372.27	-0.983654	3.7e-06	2.93e-05	3.30309	TRUE	TRUE	TRUE	FALSE
Brwd3	85.6017	-1.18657	1.99e-06	1.67e-05	7.57976	TRUE	TRUE	TRUE	FALSE
Bscl2	1182	0.477153	0.0249	0.063068	1.74295	FALSE	FALSE	FALSE	FALSE
Bsdc1	238.43	1.04781	5.75e-08	6.83e-07	8.87168	FALSE	FALSE	TRUE	FALSE
Bsg	1633.94	1.45015	8.49e-17	4.13e-15	6.45886	TRUE	FALSE	FALSE	FALSE
Bsn	47.1961	0.949632	0.00703	0.0219372	4.11579	FALSE	FALSE	FALSE	FALSE
Bspry	1358.52	0.462975	0.0223	0.0575166	1.89355	TRUE	FALSE	FALSE	FALSE
Bst2	11.2605	2.91053	0.00228	0.00844506	3.62286	FALSE	FALSE	TRUE	FALSE
Btaf1	1204.76	-1.3707	1.9e-15	7.81e-14	9.96199	TRUE	TRUE	TRUE	FALSE
Btbd10	490.886	-0.745971	1.43e-06	1.23e-05	5.99579	TRUE	FALSE	FALSE	FALSE
Btbd16	939.574	0.43522	0.0111159	0.0321002	2.16341	FALSE	FALSE	TRUE	FALSE
Btbd2	83.6702	1.26629	7.04e-06	5.21e-05	8.61766	TRUE	FALSE	FALSE	FALSE
Btd	29.7039	1.36095	0.00243	0.00889609	5.09859	FALSE	FALSE	FALSE	FALSE
Btf3l4	138.326	-0.796963	0.00342588	0.0119643	2.02927	TRUE	TRUE	FALSE	FALSE
Btg1	570.859	-0.426956	0.0103	0.0302736	2.33832	FALSE	TRUE	TRUE	FALSE
Btg2	18.8873	1.28163	0.0313	0.0762374	2.34872	TRUE	TRUE	TRUE	FALSE
Btnl10	24.4311	1.11062	0.0387	0.0906544	1.84908	TRUE	FALSE	TRUE	FALSE
Btrc	287.782	0.473051	0.0163751	0.0446208	2.6238	TRUE	FALSE	TRUE	FALSE
Bub1	411.714	-1.35057	2.74e-07	2.81e-06	2.1096	FALSE	TRUE	FALSE	TRUE
Tspoap1	28.0856	-0.98343	0.0147	0.0406473	3.02174	TRUE	FALSE	TRUE	FALSE
C030006K11Rik	13.4124	1.86051	0.0103	0.0302736	3.62373	TRUE	TRUE	TRUE	FALSE
C030034I22Rik	7.93642	-2.45465	0.00399389	0.013628	1.70939	FALSE	FALSE	FALSE	FALSE
Zfp607b	52.6697	-1.00238	0.00309	0.0109637	2.22428	FALSE	FALSE	TRUE	FALSE
C130074G19Rik	34.4539	1.58648	0.000716478	0.00308881	3.0579	FALSE	FALSE	TRUE	FALSE
C1galt1	77.8852	-1.9647	3.33e-07	3.36e-06	1.79212	TRUE	TRUE	FALSE	FALSE
C1qa	31.5666	2.32281	2.18e-06	1.82e-05	8.49183	FALSE	FALSE	TRUE	FALSE
C1qb	45.0004	1.23431	0.00864	0.0260752	2.42849	FALSE	TRUE	FALSE	FALSE
C1qbp	71.7495	1.1874	9.59e-05	0.00052851	5.69842	FALSE	FALSE	FALSE	FALSE
C1qc	28.4752	1.93962	7.93e-05	0.000447773	5.81691	TRUE	TRUE	TRUE	FALSE
C1qtnf1	5.96599	3.05549	0.0222162	0.0573055	2.06458	FALSE	TRUE	TRUE	FALSE
C1qtnf2	4.41132	4.5884	0.00360258	0.0124925	1.63669	FALSE	FALSE	FALSE	FALSE
C1qtnf4	1066.19	2.60104	3.27e-23	3.43e-21	3.60798	FALSE	FALSE	FALSE	FALSE
C1ra	25.0067	1.70409	0.00107282	0.00438371	3.88421	FALSE	FALSE	FALSE	FALSE
C1rl	12.3017	3.03569	0.000609579	0.00268336	8.09262	TRUE	FALSE	TRUE	FALSE
C1s1	34.8295	0.955176	0.0172577	0.0466688	3.86814	FALSE	FALSE	FALSE	FALSE
C2	97.259	1.4934	1.84e-07	1.97e-06	7.16035	FALSE	FALSE	FALSE	FALSE
Snhg14	104.103	-4.37824	1.69e-38	6.16e-36	5.10867	FALSE	FALSE	FALSE	FALSE
C2cd2	65.3963	-1.06698	0.000171	0.000884996	8.22074	TRUE	FALSE	TRUE	FALSE
C2cd3	398.102	-0.806159	0.000114	0.000618401	3.20645	TRUE	FALSE	FALSE	FALSE
C2cd4c	8.7498	1.75705	0.0357698	0.0850451	3.61414	TRUE	TRUE	TRUE	FALSE
C2cd4d	4.54825	3.57153	0.0142233	0.0395825	3.2762	FALSE	FALSE	FALSE	FALSE
C3	61.7728	1.50619	0.000432374	0.00198892	2.42507	FALSE	FALSE	FALSE	FALSE
Tmem250-ps	98.6178	0.825341	0.00133	0.00526824	5.42823	FALSE	FALSE	TRUE	FALSE
Steep1	15.9346	-1.46081	0.0113	0.0326345	1.83183	FALSE	FALSE	FALSE	FALSE
C330018D20Rik	36.5991	-1.07454	0.00296	0.0105639	6.42207	FALSE	FALSE	TRUE	FALSE
Rps23rg1	18.7744	-2.4653	1.33e-06	1.15e-05	6.58758	FALSE	FALSE	TRUE	FALSE
Cip2a	242.423	-1.5675	4.97e-09	7.3e-08	2.60285	FALSE	FALSE	FALSE	FALSE
C430049B03Rik	14.1705	-2.74973	6.13e-05	0.000355143	2.14018	FALSE	FALSE	FALSE	FALSE
C4bp	5.04006	-4.86618	0.000477802	0.00216332	2.67396	FALSE	TRUE	FALSE	FALSE
C4bp-ps1	9.05025	-1.86122	0.0102516	0.0300776	1.79821	FALSE	FALSE	FALSE	FALSE
C77080	20.7341	1.67578	0.0049515	0.0163791	3.02763	FALSE	FALSE	FALSE	FALSE
Nexmif	34.0779	-1.56701	0.000111	0.000601925	2.48219	TRUE	FALSE	TRUE	FALSE
Cab39	758.396	-2.56887	5.15e-59	4.46e-56	9.61388	TRUE	TRUE	TRUE	FALSE
Cab39l	322.844	-0.747609	0.0031	0.0110076	1.59946	TRUE	FALSE	TRUE	FALSE
Cabin1	191.84	0.52606	0.0382245	0.0896958	1.74407	FALSE	TRUE	FALSE	FALSE
Cables2	70.7303	0.791366	0.0137	0.0384738	2.42622	FALSE	FALSE	TRUE	FALSE
Cabs1	2666.24	-1.29647	6.34e-07	5.95e-06	1.92097	FALSE	FALSE	FALSE	FALSE
Cacna1c	116.32	-2.9605	1.29e-27	2.08e-25	5.27179	FALSE	TRUE	TRUE	FALSE
Cacna1d	68.7949	-0.708893	0.018	0.0483612	3.15255	FALSE	TRUE	FALSE	FALSE
Cacna1i	31.5791	-1.14137	0.0173751	0.0469094	2.82618	TRUE	TRUE	TRUE	FALSE
Cacna2d1	23.5986	-1.38738	0.0032188	0.0113567	2.51142	TRUE	FALSE	TRUE	FALSE
Cacna2d2	23.037	-1.41909	0.00507	0.016696	1.79276	FALSE	FALSE	FALSE	FALSE
Cacna2d3	17.9338	-1.17779	0.0389	0.0909751	2.00019	FALSE	FALSE	FALSE	FALSE
Cacnb1	214.965	0.929929	7.09e-06	5.24e-05	5.53591	FALSE	FALSE	TRUE	FALSE
Cacnb4	37.7447	-2.10383	1.82e-08	2.43e-07	5.11637	TRUE	TRUE	TRUE	FALSE
Cacng8	22.0781	2.19827	0.000437	0.00200641	2.54021	FALSE	FALSE	TRUE	FALSE
Cacul1	485.301	0.620884	0.000129	0.000688775	5.57153	TRUE	FALSE	TRUE	FALSE
Cacybp	168.736	-0.998344	3.45e-05	0.00021366	2.60924	FALSE	FALSE	FALSE	FALSE
Cad	133.388	1.61361	2.76e-09	4.29e-08	4.69983	FALSE	FALSE	FALSE	FALSE
Cadm2	50.0284	-2.63424	3.08e-13	9.56e-12	3.69664	TRUE	TRUE	TRUE	FALSE
Cadps2	24.6555	-1.1536	0.0106664	0.0310688	2.13712	TRUE	FALSE	FALSE	FALSE
Cage1	1623.29	-1.0051	5.6e-08	6.67e-07	3.58325	FALSE	FALSE	FALSE	FALSE
Calcoco1	80.2496	1.24057	6.07e-05	0.000352208	4.61415	TRUE	FALSE	FALSE	FALSE
Calcrl	10.8028	-1.47903	0.0257712	0.0649715	3.13179	TRUE	FALSE	TRUE	FALSE
Calm1	2415.14	-0.369102	0.00661	0.0208712	3.07078	FALSE	FALSE	TRUE	FALSE
Calm2	1282.65	-0.493778	0.026	0.0653569	1.26765	FALSE	FALSE	FALSE	FALSE
Calm3	1746.69	0.688164	1.71e-05	0.000114422	4.73634	TRUE	TRUE	TRUE	FALSE
Calr	1941.73	0.62603	1.8e-05	0.000119871	4.5108	FALSE	TRUE	FALSE	FALSE
Calr3	552.585	-0.431436	0.0149	0.0411352	1.96573	FALSE	FALSE	FALSE	FALSE
Camk1	5.24449	4.84609	0.000654	0.00285561	8.81413	FALSE	FALSE	FALSE	FALSE
Camk1d	3051.48	-1.62562	4.1e-22	3.96e-20	5.83782	TRUE	TRUE	TRUE	FALSE
Camk2b	18.9359	1.72623	0.00677	0.0212897	2.72835	TRUE	FALSE	FALSE	FALSE
Camk2n2	40.1766	0.74367	0.0488	0.109637	2.66581	FALSE	FALSE	TRUE	FALSE
Camsap2	370.898	-0.670071	0.00224449	0.00831817	2.66174	TRUE	TRUE	TRUE	FALSE
Camsap3	134.398	1.4785	9.15e-09	1.29e-07	5.61088	FALSE	FALSE	FALSE	FALSE
Camta1	83.7222	-0.582296	0.0284	0.0703517	2.1281	TRUE	TRUE	TRUE	FALSE
Cant1	175.68	0.870395	4.84e-05	0.000287552	5.53243	TRUE	TRUE	TRUE	FALSE
Canx	991.103	-0.507486	0.000357	0.00168488	4.67229	FALSE	FALSE	TRUE	FALSE
Cap1	350.829	1.11343	2.16e-11	4.92e-10	19.5071	FALSE	FALSE	TRUE	FALSE
Cap2	261.033	0.443569	0.0222103	0.057303	2.72372	FALSE	TRUE	TRUE	FALSE
Capg	8.90159	1.81002	0.0288	0.0711308	4.73199	FALSE	FALSE	TRUE	FALSE
Capn1	12.6641	1.94181	0.0109	0.0316879	3.40637	FALSE	FALSE	FALSE	FALSE
Capn11	203.943	0.572677	0.00398	0.0135962	4.47462	TRUE	TRUE	FALSE	FALSE
Capn7	87.932	-1.03896	0.000193	0.000985018	2.85441	TRUE	FALSE	TRUE	FALSE
Capns1	803.664	0.550903	6.66e-05	0.000383186	8.25173	TRUE	TRUE	TRUE	FALSE
Caprin1	1339.06	-0.424136	0.00229	0.00845735	4.16	TRUE	TRUE	TRUE	TRUE
Cadps2	60.6241	-2.11909	9.05e-10	1.54e-08	3.57649	TRUE	FALSE	FALSE	FALSE
Capza1	330.181	-1.06896	2.73e-06	2.22e-05	2.62105	TRUE	FALSE	TRUE	FALSE
Capza2	126.065	-1.16151	1.34e-07	1.47e-06	6.46348	TRUE	TRUE	FALSE	FALSE
Capza3	850.875	-0.808568	0.0056	0.0181746	1.24395	FALSE	FALSE	FALSE	FALSE
Capzb	961.199	0.974172	1.19e-10	2.38e-09	7.26881	FALSE	FALSE	TRUE	FALSE
Car13	3.23476	-6.16623	0.000180733	0.000925678	3.68033	TRUE	TRUE	FALSE	TRUE
Car14	9.1352	-2.75158	0.000238	0.00118152	9.08	TRUE	FALSE	FALSE	FALSE
Car2	802.8	1.15262	2.98e-13	9.27e-12	7.34119	TRUE	FALSE	FALSE	FALSE
Car9	2.16181	3.5596	0.0451	0.102782	1.95483	FALSE	FALSE	FALSE	FALSE
Card6	65.8822	-0.854134	0.00447	0.0149985	2.43248	TRUE	TRUE	TRUE	FALSE
Carf	144.85	-1.21107	6.86e-08	8e-07	4.02268	FALSE	TRUE	TRUE	FALSE
Carhsp1	258.585	0.782546	0.000122	0.000652778	4.01853	TRUE	TRUE	TRUE	FALSE
Naxd	92.3671	1.03114	0.000316	0.00150674	3.42319	FALSE	FALSE	FALSE	FALSE
Cars2	30.0629	1.02462	0.0146	0.0403769	7.01055	FALSE	FALSE	FALSE	FALSE
Casc1	209.474	-0.414705	0.0215	0.0558033	6.20933	FALSE	FALSE	FALSE	FALSE
Golm2	259.735	-0.83826	2.02e-06	1.69e-05	6.28299	TRUE	FALSE	TRUE	FALSE
Knl1	344.55	-2.08826	1.87e-25	2.45e-23	5.15822	FALSE	FALSE	TRUE	FALSE
Casd1	65.933	-2.05804	2.58e-13	8.11e-12	15.9032	TRUE	FALSE	TRUE	FALSE
Caskin1	63.2671	1.09867	0.000820907	0.00347373	4.07687	FALSE	FALSE	TRUE	FALSE
Casp1	12.9854	-2.24106	0.00406	0.0138082	1.72099	FALSE	FALSE	FALSE	FALSE
Casp8	8.35344	2.40625	0.0123974	0.0352241	3.60898	TRUE	TRUE	FALSE	TRUE
Casp8ap2	96.4226	-1.40676	5.96e-07	5.63e-06	4.86582	FALSE	FALSE	FALSE	FALSE
Casq1	12.0752	-2.33487	0.000394	0.00183412	3.17927	FALSE	FALSE	TRUE	FALSE
Cast	884.799	-0.722845	0.000919782	0.00383866	1.78321	TRUE	TRUE	TRUE	FALSE
Cat	62.9026	0.73796	0.028	0.0694802	2.27663	FALSE	TRUE	FALSE	FALSE
Catsperb	481.364	-2.19343	9.54e-20	7.13e-18	4.46665	FALSE	FALSE	FALSE	FALSE
Catsperd	533.392	-0.506745	0.0041505	0.0140597	2.4827	FALSE	FALSE	FALSE	FALSE
Catsperg1	565.123	-1.56179	9.24e-14	3.06e-12	4.89181	FALSE	FALSE	FALSE	FALSE
Catsperg2	626.1	-0.816711	3.02e-05	0.0001895	2.76278	FALSE	FALSE	FALSE	FALSE
Cav1	39.4078	-1.0146	0.0376	0.0885272	1.23525	FALSE	FALSE	FALSE	FALSE
Cav2	13.7203	-2.04661	0.000762814	0.00325459	3.48946	TRUE	TRUE	FALSE	FALSE
Cbfb	102.191	-0.710433	0.0188	0.0498484	2.47805	TRUE	TRUE	TRUE	FALSE
Cbl	329.595	-0.523141	0.00443471	0.014903	3.81168	FALSE	FALSE	TRUE	FALSE
Cblb	175.106	-0.525551	0.0135	0.0379256	3.49989	TRUE	TRUE	TRUE	FALSE
Cbll1	126.077	-0.856948	0.00382987	0.0131502	1.67691	FALSE	TRUE	TRUE	FALSE
Cbr1	44.3998	1.41781	0.000409	0.00189628	3.89732	FALSE	FALSE	FALSE	FALSE
Cbr2	11.1402	2.20806	0.0148919	0.041144	2.89305	TRUE	TRUE	FALSE	FALSE
Cbr3	15.712	3.02797	0.00176	0.00674389	1.6744	FALSE	FALSE	FALSE	FALSE
Cbr4	53.5936	-0.947352	0.0149967	0.0413611	1.38142	FALSE	FALSE	FALSE	FALSE
Cbs	4.21277	4.53632	0.00269316	0.00973278	3.13663	TRUE	TRUE	FALSE	FALSE
Cbwd1	130.741	-1.31222	9.22e-05	0.000510484	1.77609	FALSE	FALSE	FALSE	FALSE
Cbx2	22.4284	1.63118	0.0067	0.0211175	3.0836	TRUE	TRUE	TRUE	FALSE
Cbx4	35.7876	1.71796	9.8e-05	0.000538597	5.30659	TRUE	TRUE	TRUE	FALSE
Cbx5	493.422	-1.67816	2.58e-22	2.53e-20	8.01942	TRUE	TRUE	TRUE	TRUE
Cbx7	129.505	0.828242	0.00132	0.00526482	3.40702	TRUE	FALSE	TRUE	FALSE
Cby1	237.343	1.0556	1.03e-07	1.16e-06	7.72406	FALSE	FALSE	TRUE	FALSE
Cc2d1a	170	1.4131	1.11e-09	1.86e-08	7.09239	FALSE	FALSE	FALSE	FALSE
Cc2d1b	177.335	0.496704	0.025194	0.0636578	2.48093	TRUE	TRUE	TRUE	FALSE
Ccar1	496.842	-1.76088	1.05e-15	4.47e-14	3.52272	TRUE	TRUE	TRUE	FALSE
Ccar2	309.353	1.09812	1.96e-05	0.000129556	4.42714	TRUE	TRUE	FALSE	FALSE
Ccbe1	101.223	-0.858979	0.000463801	0.00210752	4.30437	TRUE	TRUE	TRUE	FALSE
Kyat1	51.5131	0.689173	0.0324	0.0784506	5.40975	FALSE	FALSE	FALSE	FALSE
Sgf29	653.228	0.573429	0.000357	0.00168488	4.66107	FALSE	FALSE	FALSE	FALSE
Ccdc105	369.659	1.56806	4.49e-18	2.6e-16	9.71663	FALSE	FALSE	FALSE	FALSE
Ccdc106	65.8711	1.48287	1.53e-05	0.000104121	4.88629	FALSE	FALSE	FALSE	FALSE
Ccdc107	40.1273	2.3383	1.21e-06	1.06e-05	3.6017	FALSE	FALSE	FALSE	FALSE
Cfap65	1166.31	-0.618574	0.00632	0.0201187	2.26282	FALSE	FALSE	FALSE	FALSE
Ccdc110	566.413	-0.990131	0.000668359	0.0029092	1.65358	FALSE	FALSE	FALSE	FALSE
Odad1	152.374	0.758679	0.00312488	0.011077	2.5693	TRUE	FALSE	FALSE	FALSE
Ccdc117	512.349	-0.888953	1.41e-07	1.54e-06	4.64512	FALSE	TRUE	TRUE	FALSE
Ccdc120	3.50689	4.26718	0.00733197	0.0227498	2.48578	TRUE	TRUE	FALSE	FALSE
Ccdc124	146.689	1.60135	1.49e-07	1.61e-06	4.83444	FALSE	FALSE	FALSE	FALSE
Ccdc127	109.828	-0.747066	0.00793	0.0242977	1.85193	TRUE	TRUE	TRUE	FALSE
Vps50	122.422	-0.948949	0.0195329	0.051585	0.941815	TRUE	FALSE	TRUE	FALSE
Ccdc138	102.496	-1.3205	2.27e-07	2.39e-06	7.2018	TRUE	FALSE	FALSE	FALSE
Ccdc14	127.482	-1.52444	4.02e-10	7.36e-09	5.67529	TRUE	TRUE	FALSE	FALSE
Ccdc141	18.715	-1.08689	0.0313	0.0762239	2.23228	FALSE	TRUE	FALSE	FALSE
Ccdc144b	67.6874	-1.58331	8.25e-07	7.52e-06	3.0593	TRUE	TRUE	FALSE	FALSE
Ccdc146	289.72	-1.27867	1.42e-06	1.22e-05	4.30239	FALSE	FALSE	TRUE	FALSE
Ccdc15	133.486	-1.18271	6.62e-06	4.92e-05	2.55027	FALSE	TRUE	TRUE	FALSE
Ccdc150	724.982	-1.24045	5.65e-08	6.72e-07	3.12071	FALSE	FALSE	FALSE	FALSE
Kash5	295.372	1.3586	7.73e-10	1.33e-08	7.26951	FALSE	FALSE	FALSE	FALSE
Ccdc158	538.243	-0.914535	1.09e-06	9.67e-06	4.90088	TRUE	TRUE	FALSE	FALSE
Ccdc159	231.51	0.693028	0.00303629	0.0107967	2.35617	FALSE	FALSE	FALSE	FALSE
Ccdc163	202.941	-0.89061	2.8e-06	2.28e-05	6.16479	TRUE	TRUE	FALSE	FALSE
Ccdc169	347.924	-0.669462	0.00202	0.0075852	1.90594	TRUE	TRUE	FALSE	FALSE
Ccdc171	350.363	-0.391734	0.0208	0.0542589	3.32885	FALSE	FALSE	TRUE	FALSE
Ccdc172	75.4102	-1.13533	0.00157	0.00610369	1.78205	FALSE	FALSE	FALSE	FALSE
Ccdc173	417.439	-1.8295	9.89e-15	3.69e-13	3.2148	FALSE	FALSE	FALSE	FALSE
Ccdc174	75.376	-0.622397	0.0187	0.0497338	3.4289	TRUE	FALSE	FALSE	FALSE
Ccdc175	562.032	-1.7616	3.06e-10	5.7e-09	2.26967	FALSE	FALSE	FALSE	FALSE
Bbof1	822.348	-1.59139	1.06e-08	1.47e-07	2.07367	FALSE	FALSE	FALSE	FALSE
Ccdc178	591.656	-1.82369	3.48e-11	7.66e-10	2.34744	TRUE	FALSE	FALSE	FALSE
Ccdc18	172.062	-2.44429	7.37e-17	3.63e-15	3.39574	TRUE	FALSE	FALSE	FALSE
Ccdc180	214.187	-0.542537	0.0121133	0.0345848	2.47594	FALSE	FALSE	FALSE	FALSE
Ccdc181	1133.05	-0.686932	0.000501	0.00225474	2.29957	FALSE	FALSE	FALSE	FALSE
Ccdc183	505.567	-0.60394	0.0123532	0.0351426	1.35679	FALSE	FALSE	FALSE	FALSE
Ccdc184	127.136	1.06915	0.00025774	0.00126224	3.48397	FALSE	FALSE	FALSE	FALSE
Ccdc185	645.241	0.485777	0.0148352	0.0410465	2.2021	FALSE	FALSE	FALSE	FALSE
Ccdc186	400.561	-1.49371	1.06e-07	1.19e-06	2.00323	FALSE	FALSE	TRUE	FALSE
Ccdc24	187.349	0.545622	0.00700664	0.021905	4.31323	FALSE	FALSE	TRUE	FALSE
Ccdc28b	21.3307	1.16723	0.0241	0.0613776	3.10585	FALSE	FALSE	FALSE	FALSE
Ccdc30	1263.58	-0.832702	3.49e-06	2.77e-05	2.85106	TRUE	FALSE	FALSE	FALSE
Ccdc33	419.098	0.359593	0.0205	0.0535917	5.25655	FALSE	FALSE	FALSE	FALSE
Ccdc34	137.25	-0.83246	0.000123	0.000661795	7.24152	TRUE	FALSE	FALSE	FALSE
Ccdc34os	42.5304	-1.1555	0.0343	0.082261	1.07132	FALSE	FALSE	FALSE	FALSE
Cfap100	165.999	-0.801588	0.000171987	0.000888396	5.90822	FALSE	FALSE	FALSE	FALSE
Ccdc38	1766.94	-1.32914	8.17e-10	1.4e-08	2.77859	TRUE	TRUE	TRUE	FALSE
Ccdc39	743.154	-1.94366	9.11e-17	4.4e-15	3.29224	TRUE	FALSE	FALSE	FALSE
Ccdc42	318.964	1.00057	3.48e-06	2.77e-05	4.80388	TRUE	FALSE	FALSE	FALSE
Ccdc43	38.4989	-0.801111	0.0194	0.0512032	8.03232	FALSE	FALSE	TRUE	FALSE
Ccdc47	140.335	-1.09635	1.93e-05	0.000127856	2.67906	TRUE	TRUE	TRUE	TRUE
Ccdc50	383.932	-0.577526	0.0136523	0.0382571	1.43817	TRUE	TRUE	TRUE	FALSE
Ccdc54	1224.48	-1.30027	2.59e-07	2.68e-06	2.23306	FALSE	FALSE	FALSE	FALSE
Nsrp1	143.024	-1.26775	8.63e-08	9.91e-07	3.89151	TRUE	FALSE	FALSE	FALSE
Ccdc57	200.273	1.04712	8.82e-06	6.38e-05	4.92733	FALSE	FALSE	FALSE	FALSE
Ccdc60	1677.86	0.337832	0.0245	0.0622065	2.51666	FALSE	FALSE	FALSE	FALSE
Ccdc61	62.5346	0.692263	0.0356188	0.0847639	2.18542	FALSE	FALSE	TRUE	FALSE
Ccdc62	577.853	-0.732243	2.77e-05	0.000175586	3.98715	FALSE	FALSE	TRUE	FALSE
Bicdl1	38.1492	-1.41594	0.000153021	0.000799519	4.26001	FALSE	FALSE	FALSE	FALSE
Ccdc65	864.377	0.365342	0.00836151	0.0253807	4.68744	FALSE	FALSE	FALSE	FALSE
Ccdc66	132.061	-1.04019	1.77e-06	1.5e-05	9.44677	TRUE	FALSE	TRUE	FALSE
Deup1	858.341	-0.783259	2.43e-05	0.000156184	2.765	FALSE	FALSE	TRUE	FALSE
Ccdc70	495.934	-0.865424	0.000464954	0.00211223	2.03223	FALSE	FALSE	TRUE	FALSE
Ccdc71	100.596	1.10983	4.75e-05	0.000283323	5.56872	TRUE	FALSE	TRUE	FALSE
Ccdc73	142.471	-1.80289	6.57e-14	2.21e-12	11.3532	TRUE	FALSE	FALSE	FALSE
Ccdc74a	147.946	1.11482	2.12e-05	0.000138304	4.36101	FALSE	FALSE	FALSE	FALSE
Ccdc77	110.97	-0.605148	0.0131	0.0368346	2.26433	TRUE	TRUE	TRUE	FALSE
Terb1	104.4	-1.15944	1.96e-05	0.000129556	2.54428	FALSE	FALSE	FALSE	FALSE
Ccdc7a	238.226	-0.76687	0.00147359	0.00577078	1.83689	TRUE	FALSE	FALSE	FALSE
Ccdc7b	573.167	-2.08672	7.59e-12	1.88e-10	2.17082	TRUE	FALSE	FALSE	FALSE
Ccdc8	15.0233	2.06007	0.00361	0.012525	3.61626	FALSE	FALSE	FALSE	FALSE
Ccdc81	610.749	-0.772027	8e-06	5.84e-05	4.73768	FALSE	FALSE	FALSE	FALSE
Ccdc82	38.0617	-1.71389	3.33e-06	2.66e-05	5.73332	TRUE	TRUE	TRUE	TRUE
Ccdc83	325.062	-1.16849	0.000191986	0.000979169	1.49715	TRUE	FALSE	TRUE	FALSE
Ccdc85b	11.9392	1.39737	0.0487	0.109435	2.24424	TRUE	TRUE	TRUE	FALSE
Ccdc86	112.068	0.777443	0.0011	0.00447133	7.1251	TRUE	FALSE	TRUE	FALSE
Ccdc88a	883.877	-2.03131	1.23e-11	2.94e-10	3.22835	TRUE	TRUE	FALSE	TRUE
Ccdc92	1390.94	0.971138	3.94e-10	7.21e-09	5.73243	TRUE	TRUE	TRUE	FALSE
Ccl22	16.9648	-1.82741	0.0027	0.00976483	2.20942	TRUE	TRUE	FALSE	FALSE
Ccl27a	283.516	2.47794	1.13e-13	3.7e-12	2.89514	FALSE	FALSE	FALSE	FALSE
Ccm2	32.3634	0.96204	0.0430294	0.0989263	1.81634	FALSE	FALSE	TRUE	FALSE
Ccna1	412.109	0.773611	2.54e-05	0.000162621	4.36338	FALSE	FALSE	FALSE	FALSE
Ccnc	79.2567	-1.85916	9.18e-11	1.89e-09	7.41478	TRUE	TRUE	TRUE	FALSE
Ccnd3	270.905	0.502957	0.0267014	0.0668116	1.94419	TRUE	FALSE	TRUE	FALSE
Ccne2	79.473	-0.976791	0.00102	0.00418975	3.01552	TRUE	TRUE	TRUE	FALSE
Ccnf	77.2416	1.01358	0.00553	0.0179865	2.34643	TRUE	FALSE	TRUE	FALSE
Ccnjl	11.4117	1.70861	0.0198	0.0521267	3.76973	FALSE	FALSE	TRUE	FALSE
Ccnk	1975.92	-0.763123	7.91e-05	0.000446581	3.93157	FALSE	FALSE	FALSE	FALSE
Ccnl1	169.297	-1.03761	0.000124165	0.000664809	1.95691	TRUE	FALSE	FALSE	FALSE
Ccno	16.4281	2.37196	0.000512168	0.00229912	5.34328	TRUE	TRUE	FALSE	FALSE
Ccnt2	74.1625	-1.12813	8.22e-05	0.000462213	3.09934	TRUE	TRUE	TRUE	FALSE
Ccny	249.948	-0.388821	0.0369281	0.08732	2.58229	TRUE	TRUE	TRUE	FALSE
Ccp110	774.608	-0.623953	0.00102747	0.00422212	2.42822	TRUE	FALSE	TRUE	FALSE
Noct	10.7853	-1.88825	0.0143	0.0396546	1.77194	FALSE	FALSE	FALSE	TRUE
Ccs	108.509	1.04578	0.000102	0.00055692	4.34869	FALSE	TRUE	FALSE	FALSE
Ccsap	254.609	0.599805	0.00622878	0.0198733	2.51885	TRUE	FALSE	TRUE	FALSE
Ccser2	733.597	-1.02878	7.28e-06	5.36e-05	2.12038	TRUE	TRUE	TRUE	TRUE
Cct7	1623.25	0.349074	0.023	0.0589613	2.52877	FALSE	FALSE	FALSE	FALSE
Ccz1	203.131	-0.626951	0.0185868	0.0495112	1.41051	TRUE	FALSE	TRUE	FALSE
Cd109	274.767	-1.3089	1.2e-06	1.05e-05	2.17105	TRUE	TRUE	FALSE	FALSE
Cd151	303.413	1.82319	8.18e-13	2.37e-11	4.15309	FALSE	FALSE	FALSE	FALSE
Cd160	8.72309	-1.58821	0.0248	0.0628507	2.60877	FALSE	TRUE	TRUE	FALSE
Cd164	941.163	-1.47138	2.19e-19	1.57e-17	6.56814	TRUE	FALSE	TRUE	FALSE
Cd164l2	15.4447	1.5405	0.0232454	0.0594452	1.85547	FALSE	FALSE	FALSE	FALSE
Cd209a	3.49927	-4.2729	0.00391688	0.0134058	6.39439	TRUE	FALSE	TRUE	FALSE
Cd24a	15.7354	-1.1661	0.0319	0.0773821	3.5903	FALSE	FALSE	FALSE	FALSE
Cd320	555.016	1.17555	6.67e-06	4.96e-05	2.09588	TRUE	FALSE	FALSE	FALSE
Cd36	421.362	-2.73061	4.55e-49	2.58e-46	11.378	FALSE	TRUE	FALSE	FALSE
Cd44	8.81379	-5.09026	2.81e-06	2.28e-05	3.65943	TRUE	FALSE	FALSE	FALSE
Cd46	84.6487	-1.96511	7.55e-09	1.08e-07	2.52563	FALSE	TRUE	TRUE	FALSE
Cd47	38.0106	0.974739	0.0153	0.0420685	2.76796	TRUE	TRUE	TRUE	FALSE
Cd53	11.0335	-2.80318	0.00103	0.00421429	1.50925	TRUE	TRUE	TRUE	FALSE
Cd55b	448.068	-0.921389	4.22e-05	0.000255287	2.23585	FALSE	FALSE	FALSE	FALSE
Cd5l	12.6068	-2.18569	0.000665	0.0028983	4.3547	FALSE	FALSE	FALSE	FALSE
Cd63	61.7072	2.04779	1.8e-06	1.52e-05	3.08728	FALSE	FALSE	FALSE	FALSE
Cd74	45.2271	2.73208	1.54e-07	1.67e-06	2.97946	TRUE	TRUE	TRUE	FALSE
Cd81	357.494	0.896507	6.65e-08	7.78e-07	12.8946	FALSE	FALSE	TRUE	FALSE
Cd82	56.7338	1.06868	0.00159082	0.00616475	4.02396	FALSE	FALSE	FALSE	FALSE
Cd84	8.99708	-1.66755	0.045	0.102541	1.21012	TRUE	TRUE	TRUE	FALSE
Cd8b1	7.5635	-1.5519	0.0389	0.0909618	2.45969	FALSE	TRUE	TRUE	FALSE
Cd99l2	44.7924	1.25564	0.000609	0.0026821	5.74863	FALSE	FALSE	TRUE	FALSE
Cdadc1	77.2948	-0.875357	0.00366	0.0126492	1.92435	TRUE	FALSE	TRUE	FALSE
Cdc20	432.786	1.23671	3.59e-12	9.59e-11	9.49998	TRUE	FALSE	FALSE	FALSE
Cdc25a	242.889	0.453898	0.0175	0.0472774	3.23859	FALSE	FALSE	TRUE	FALSE
Cdc27	794.072	-1.40317	2.3e-19	1.62e-17	7.72307	TRUE	TRUE	TRUE	TRUE
Cdc34	991.077	2.085	2.4e-29	4.58e-27	7.21066	FALSE	FALSE	FALSE	FALSE
Cdc37	173.762	1.19137	3.13e-07	3.18e-06	6.52879	TRUE	TRUE	TRUE	TRUE
Cdc37l1	385.691	-1.16584	1.21e-13	3.93e-12	11.5679	TRUE	TRUE	TRUE	FALSE
Cdc40	73.9465	-0.625178	0.0153	0.0421302	16.9811	TRUE	FALSE	FALSE	FALSE
Cdc42	297.953	-0.385673	0.0184	0.0490301	5.93827	TRUE	FALSE	FALSE	FALSE
Cdc42bpa	174.002	-0.965271	4.9e-06	3.76e-05	5.18208	TRUE	FALSE	TRUE	FALSE
Cdc42bpb	227.972	1.00439	1.11e-05	7.82e-05	3.49871	FALSE	FALSE	TRUE	FALSE
Cdc42ep3	553.248	-0.923268	5.84e-07	5.53e-06	3.22859	FALSE	TRUE	FALSE	FALSE
Cdc42ep5	70.7396	2.15495	4.32e-10	7.85e-09	8.3016	FALSE	FALSE	FALSE	FALSE
Cdc7	74.2649	-1.0864	3.03e-05	0.000189909	8.43147	TRUE	FALSE	FALSE	FALSE
Cdc73	178.278	-1.22027	2.17e-08	2.85e-07	4.01049	TRUE	TRUE	TRUE	FALSE
Cdca2	726.765	-0.413989	0.007475	0.0231304	3.8091	TRUE	TRUE	FALSE	TRUE
Cdca3	570.028	0.333387	0.0197156	0.0519881	6.73416	FALSE	FALSE	TRUE	FALSE
Cdca7	15.7821	1.92306	0.0051	0.0167531	2.67632	FALSE	FALSE	FALSE	FALSE
Cdca8	227.78	0.405059	0.0288629	0.071378	4.14062	TRUE	FALSE	TRUE	FALSE
Cdh12	10.2179	-1.63104	0.0259849	0.0653832	1.77452	TRUE	TRUE	FALSE	TRUE
Cdh18	12.9679	-1.87214	0.00505636	0.0166629	1.70934	FALSE	TRUE	TRUE	FALSE
Cdh22	44.2341	-3.70395	1.07e-15	4.55e-14	3.74975	FALSE	FALSE	TRUE	FALSE
Cdh4	13.7695	-3.08527	6.64e-07	6.19e-06	6.14245	FALSE	FALSE	TRUE	FALSE
Cdh9	6.45254	-2.4539	0.0227	0.0582594	1.63916	FALSE	FALSE	FALSE	FALSE
Cdhr5	21.7833	2.16839	0.000426	0.00196454	3.77205	FALSE	FALSE	FALSE	FALSE
Cdk10	88.2543	0.889371	0.00135846	0.0053826	4.53784	TRUE	TRUE	TRUE	TRUE
Cdk12	316.601	-0.645343	0.000776	0.00329993	3.47483	TRUE	TRUE	TRUE	FALSE
Cdk13	487.273	-0.471346	0.00634	0.0201608	2.70311	TRUE	TRUE	TRUE	FALSE
Cdk16	488.273	0.750633	1.07e-05	7.59e-05	4.6639	TRUE	TRUE	FALSE	FALSE
Cdk19	379.316	-0.783796	8.42e-06	6.12e-05	4.78132	FALSE	TRUE	FALSE	FALSE
Cdk20	150.026	0.899639	0.000621	0.00272709	2.86806	FALSE	FALSE	TRUE	FALSE
Cdk2ap1	27.1658	1.92908	0.000281833	0.00136208	3.05604	FALSE	FALSE	TRUE	FALSE
Cdk2ap2	26.5837	2.21453	0.000269264	0.00130794	3.72577	TRUE	TRUE	TRUE	TRUE
Cdk4	109.706	0.816721	0.00120031	0.00483075	4.29718	TRUE	TRUE	FALSE	TRUE
Cdk5	79.997	0.893505	0.00133993	0.00531845	5.45452	TRUE	TRUE	TRUE	TRUE
Cdk5rap2	913.936	-0.745221	0.0018175	0.00692794	2.86629	FALSE	TRUE	TRUE	FALSE
Cdk5rap3	252.149	0.686341	0.00118	0.00476984	3.51983	FALSE	TRUE	TRUE	FALSE
Cdk8	712.682	-3.93497	1.18e-62	1.22e-59	6.61599	TRUE	TRUE	FALSE	FALSE
Cdk9	71.3885	1.34196	0.000454	0.00207173	3.50751	FALSE	FALSE	TRUE	FALSE
Cdkal1	353.021	-1.01239	1.97e-07	2.1e-06	3.48119	TRUE	FALSE	FALSE	FALSE
Cdkl2	531.605	-1.07244	1.9e-09	3.04e-08	6.10493	FALSE	FALSE	TRUE	FALSE
Cdkl3	1347.72	-0.887127	9.59e-07	8.62e-06	3.05235	TRUE	TRUE	TRUE	FALSE
Cdkl4	164.295	-0.627047	0.0131	0.0370586	1.76437	TRUE	TRUE	TRUE	TRUE
Cdkl5	133.771	-0.946874	0.000385052	0.00180058	2.25525	FALSE	FALSE	FALSE	FALSE
Cdkn1a	38.0431	1.3624	0.00076	0.00324748	5.23602	TRUE	FALSE	FALSE	FALSE
Cdkn1c	55.7491	2.29342	6.27e-07	5.9e-06	3.76509	TRUE	TRUE	FALSE	TRUE
Cdkn2a	8.32717	5.5154	3.81e-05	0.000233188	9.08809	TRUE	FALSE	TRUE	FALSE
Cdkn2aip	432.977	-0.444131	0.00943	0.0280217	3.0982	TRUE	FALSE	TRUE	FALSE
Cdkn3	443.329	-0.624617	0.00655277	0.0207141	1.56654	TRUE	TRUE	FALSE	FALSE
Cdr1	1.98703	-5.45374	0.00335	0.0117513	18.096	FALSE	FALSE	FALSE	FALSE
Cds2	134.975	0.586702	0.018491	0.0493065	2.39849	TRUE	TRUE	TRUE	FALSE
Cdt1	10.6259	2.10219	0.0207	0.0541236	1.84414	TRUE	FALSE	FALSE	FALSE
Cdv3	1073.79	1.37026	4.8e-20	3.62e-18	9.29311	TRUE	TRUE	TRUE	FALSE
Cdyl2	89.2562	-0.728406	0.0133	0.0375332	1.74991	TRUE	TRUE	TRUE	FALSE
Cebpa	315.14	-3.88049	1.93e-84	2.93e-81	13.6002	FALSE	FALSE	TRUE	FALSE
Cebpb	10.0533	3.15723	0.00225486	0.00835259	4.42131	FALSE	TRUE	TRUE	FALSE
Cebpz	172.68	-0.951387	0.000652	0.00284713	1.73014	FALSE	FALSE	FALSE	FALSE
Hdhd5	101.288	0.637637	0.0288601	0.071378	1.95625	FALSE	FALSE	TRUE	FALSE
Cela3a	2.24498	-5.63923	0.00557644	0.0181197	1.38272	FALSE	FALSE	TRUE	FALSE
Celf2	138.172	-0.741937	0.00257713	0.00936189	2.19376	TRUE	TRUE	TRUE	FALSE
Celf3	144.588	-0.798414	0.00261158	0.00946996	1.86803	TRUE	TRUE	FALSE	TRUE
Celf4	24.6571	-1.00101	0.0280022	0.0695823	2.02659	TRUE	TRUE	TRUE	FALSE
Celf5	95.4458	-0.551911	0.040247	0.0937265	2.23813	TRUE	TRUE	TRUE	FALSE
Cenpb	90.2958	1.64406	8.52e-09	1.21e-07	10.8721	FALSE	TRUE	TRUE	FALSE
Cenpc1	158.946	-0.836762	0.00203344	0.00763887	1.76472	FALSE	FALSE	FALSE	FALSE
Cenpe	465.671	-1.29613	2.55e-06	2.09e-05	3.54162	FALSE	FALSE	FALSE	FALSE
Cenpf	862.41	-1.77932	2.17e-17	1.13e-15	10.4781	TRUE	TRUE	FALSE	FALSE
Cenpi	53.7834	-1.89696	1.61e-09	2.61e-08	7.4085	TRUE	TRUE	TRUE	FALSE
Cenpj	152.318	-1.402	1.87e-09	3e-08	5.76061	TRUE	TRUE	FALSE	FALSE
Cenpk	60.1152	-2.096	4.48e-09	6.69e-08	2.6261	TRUE	FALSE	FALSE	FALSE
Cenpl	86.7146	-1.41808	2.4e-06	1.98e-05	2.49509	TRUE	FALSE	FALSE	FALSE
Cenpm	25.6059	1.61011	0.0203	0.0532201	1.166	TRUE	FALSE	TRUE	FALSE
Cenpo	81.64	-0.564852	0.028887	0.0714097	3.15767	TRUE	FALSE	TRUE	FALSE
Cenpp	106.228	-1.651	5.36e-08	6.41e-07	2.74257	FALSE	FALSE	FALSE	FALSE
Cenpq	68.3445	-1.27035	4.25e-06	3.31e-05	7.22039	TRUE	FALSE	TRUE	FALSE
Cenpt	32.6952	1.41789	0.00118603	0.00478322	4.84946	FALSE	FALSE	FALSE	FALSE
Cenpv	1070.78	0.787344	2.61e-08	3.36e-07	8.2818	FALSE	FALSE	FALSE	FALSE
Cep112	692.303	-0.752821	0.00786833	0.0241459	1.18329	TRUE	FALSE	TRUE	FALSE
Cep120	555.687	-0.412347	0.00689561	0.0216099	4.55892	TRUE	FALSE	TRUE	FALSE
Cep126	901.943	-1.14395	1.25e-09	2.07e-08	4.3771	FALSE	FALSE	FALSE	FALSE
Cep128	1392.32	-1.33906	6.07e-12	1.54e-10	6.71572	TRUE	TRUE	FALSE	FALSE
Cep131	153.393	0.579342	0.0486966	0.109435	1.46675	FALSE	FALSE	FALSE	FALSE
Cep135	145.733	-1.61451	1.4e-10	2.78e-09	4.40887	TRUE	TRUE	FALSE	FALSE
Cep152	56.3512	-1.14343	0.00141537	0.00557525	4.51612	FALSE	FALSE	FALSE	FALSE
Cep162	252.925	-1.15862	3.18e-09	4.88e-08	4.50904	FALSE	TRUE	FALSE	FALSE
Cep170	659.006	-1.11589	2.39e-07	2.49e-06	3.68174	TRUE	TRUE	TRUE	FALSE
Cep170b	253.569	1.39947	5.23e-10	9.34e-09	5.62444	TRUE	FALSE	TRUE	FALSE
Cep192	567.103	-1.16637	1.09e-12	3.11e-11	6.0659	TRUE	TRUE	FALSE	FALSE
Cep290	955.087	-1.90126	7.27e-13	2.13e-11	2.39103	FALSE	FALSE	TRUE	FALSE
Cep295	714.105	-1.35791	1.05e-10	2.13e-09	4.54014	TRUE	FALSE	FALSE	FALSE
Cep350	1425.23	-1.21867	2.08e-09	3.3e-08	6.25624	TRUE	TRUE	TRUE	FALSE
Cep41	261.077	0.43375	0.0225	0.0579039	2.9709	TRUE	TRUE	TRUE	FALSE
Cep44	91.3044	-0.611395	0.029	0.0716115	1.55369	TRUE	FALSE	FALSE	FALSE
Cep55	120.006	-1.32679	6.79e-07	6.32e-06	4.25967	TRUE	TRUE	TRUE	TRUE
Cep57	880.753	-1.10611	1.78e-06	1.51e-05	2.19852	TRUE	FALSE	TRUE	FALSE
Cep57l1	226.501	-0.590509	0.0345	0.082734	1.09274	TRUE	TRUE	TRUE	FALSE
Cep63	1702.05	-0.507794	0.00155	0.00604022	3.14952	TRUE	FALSE	FALSE	FALSE
Cep70	213.519	-1.36915	8.62e-07	7.82e-06	2.08258	FALSE	FALSE	TRUE	FALSE
Cep72	952.731	-0.675477	3.98e-05	0.00024284	3.44142	TRUE	TRUE	TRUE	FALSE
Cep76	151.354	-0.593467	0.00568	0.0183913	2.82753	TRUE	FALSE	TRUE	FALSE
Cep83	686.861	-0.782944	0.000139	0.000734607	2.64651	TRUE	TRUE	FALSE	FALSE
Cep83os	723.325	-1.9777	1.34e-44	6.39e-42	17.9121	FALSE	FALSE	FALSE	FALSE
Cep85l	1098.58	-1.02405	0.000114767	0.00062108	1.615	FALSE	TRUE	TRUE	FALSE
Cep95	317.106	-0.49213	0.00259	0.00939864	5.30503	TRUE	FALSE	FALSE	FALSE
Cep97	76.5314	-0.635594	0.021	0.0546008	2.83005	TRUE	TRUE	TRUE	FALSE
Cept1	29.4537	-2.11756	0.000278162	0.00134685	1.47119	FALSE	FALSE	TRUE	FALSE
Cercam	32.3837	1.40285	0.00382991	0.0131502	2.39439	FALSE	FALSE	FALSE	FALSE
Cerk	563.945	-0.806465	1.06e-07	1.2e-06	9.92546	FALSE	TRUE	TRUE	FALSE
Cers3	625.382	-0.647701	5.39e-05	0.000317572	4.38861	FALSE	FALSE	FALSE	FALSE
Cers5	90.1953	0.677205	0.0149	0.0411546	2.87906	TRUE	TRUE	TRUE	FALSE
Ces1d	102.931	1.46105	0.000134593	0.000713705	3.84583	FALSE	TRUE	FALSE	FALSE
Ces5a	12.1024	-3.45986	2.03e-06	1.7e-05	4.32852	TRUE	FALSE	FALSE	FALSE
Cetn1	1307.94	-0.846835	0.00155	0.00603985	1.41167	FALSE	TRUE	TRUE	TRUE
Cetn3	299.241	-1.24245	1.92e-05	0.000127008	1.73808	TRUE	TRUE	FALSE	FALSE
Cetn4	359.293	-0.881314	1.41e-05	9.7e-05	3.25968	TRUE	TRUE	FALSE	FALSE
Cfap221	128.794	-0.612394	0.0107	0.0312311	2.82608	FALSE	FALSE	FALSE	FALSE
Cfap36	1381.31	-1.05501	3.69e-09	5.6e-08	3.56772	TRUE	FALSE	FALSE	FALSE
Cfap43	1093.32	-0.809093	3.83e-07	3.8e-06	6.46142	FALSE	FALSE	TRUE	FALSE
Cfap44	418.838	-0.904736	6.61e-06	4.92e-05	5.19207	TRUE	FALSE	FALSE	FALSE
Cfap45	601.086	-0.5605	0.00273915	0.00987734	2.33207	FALSE	FALSE	FALSE	FALSE
Cfap46	366.358	-1.3384	3.84e-12	1.02e-10	8.53826	TRUE	FALSE	FALSE	FALSE
Cfap53	283.15	-1.26383	1.92e-08	2.54e-07	3.32412	FALSE	FALSE	FALSE	FALSE
Cfap57	806.908	-0.849582	4.56e-07	4.43e-06	5.33943	FALSE	FALSE	FALSE	FALSE
Cfap58	493.635	-1.04052	3.1e-05	0.000193591	2.79132	FALSE	FALSE	FALSE	FALSE
Cfap69	1314.02	-1.14194	2.93e-14	1.04e-12	6.10589	TRUE	FALSE	FALSE	FALSE
Cfap70	837.465	-0.471683	0.00378387	0.0130094	3.00106	FALSE	FALSE	FALSE	FALSE
Cfap74	225.08	-0.887407	0.00028	0.00135519	2.97118	FALSE	FALSE	TRUE	FALSE
Cfap97	1768.26	-1.3534	9.73e-17	4.68e-15	5.24739	TRUE	FALSE	TRUE	FALSE
Cfdp1	148.114	-0.661152	0.0234	0.0598425	1.33916	FALSE	FALSE	FALSE	FALSE
Cfhr1	25.9934	-2.74789	2.35e-07	2.46e-06	4.36185	FALSE	FALSE	FALSE	FALSE
Cfl2	309.913	-0.851432	2.4e-05	0.000154754	3.02455	FALSE	FALSE	TRUE	FALSE
Cftr	218.677	-2.14313	1.65e-21	1.44e-19	4.44683	TRUE	TRUE	FALSE	FALSE
Cggbp1	503.206	-2.00176	3.74e-35	1.06e-32	8.71636	TRUE	TRUE	TRUE	FALSE
Cgnl1	168.259	0.641219	0.00407	0.0138134	3.29043	TRUE	TRUE	TRUE	FALSE
Chchd10	132.427	3.05118	2.28e-24	2.63e-22	20.2428	FALSE	FALSE	FALSE	FALSE
Chchd2	239.297	1.70596	2.23e-11	5.06e-10	3.90748	FALSE	FALSE	TRUE	FALSE
Chchd3	445.41	-1.21884	1.45e-07	1.58e-06	2.47985	TRUE	FALSE	TRUE	FALSE
Chchd4	50.0868	0.802932	0.0404062	0.0940258	1.66447	FALSE	FALSE	TRUE	FALSE
Chchd6	713.561	1.83555	2.1e-13	6.63e-12	2.96462	TRUE	FALSE	TRUE	FALSE
Chchd7	83.2608	0.851108	0.00858	0.0259202	1.94226	TRUE	FALSE	FALSE	FALSE
Chd1	226.769	-0.787294	1.82e-05	0.000121282	8.66915	TRUE	FALSE	TRUE	FALSE
Chd2	127.395	-1.04977	3.75e-05	0.000230377	4.00205	FALSE	TRUE	TRUE	FALSE
Rnf227	38.8846	-0.872716	0.0195475	0.0516162	3.44662	TRUE	FALSE	FALSE	FALSE
Chd3	90.6392	-0.915759	0.0044465	0.0149314	2.74811	TRUE	FALSE	TRUE	FALSE
Chd9	110.614	-1.26439	9.78e-06	7.01e-05	2.78044	TRUE	TRUE	FALSE	FALSE
Chek1	46.5509	-1.7164	3.06e-05	0.000191319	2.11796	FALSE	FALSE	FALSE	FALSE
Cherp	295.173	0.627056	0.00971	0.0287446	1.8895	FALSE	FALSE	FALSE	FALSE
Chfr	231.278	-0.786502	1.25e-05	8.7e-05	6.01209	FALSE	TRUE	FALSE	FALSE
Chga	23.5642	2.80271	3.89e-06	3.06e-05	16.3938	FALSE	FALSE	FALSE	FALSE
Chid1	144.383	0.831102	0.000398	0.00185296	4.07114	TRUE	TRUE	TRUE	FALSE
Chl1	2597.45	-0.782411	1.35e-05	9.29e-05	2.82386	TRUE	TRUE	TRUE	FALSE
Chml	71.2278	-2.10707	6.93e-12	1.74e-10	5.59652	FALSE	TRUE	TRUE	FALSE
Chmp1a	243.111	0.76973	0.000481	0.00217645	3.58154	FALSE	FALSE	TRUE	FALSE
Chmp3	163.521	-0.917371	0.000157225	0.000819601	2.56057	FALSE	FALSE	TRUE	FALSE
Chmp4b	196.936	1.50698	1.23e-10	2.45e-09	5.17419	FALSE	TRUE	FALSE	FALSE
Chmp6	133.241	1.25381	1.4e-07	1.54e-06	7.52498	FALSE	FALSE	FALSE	FALSE
Chmp7	79.4575	1.25722	1.65e-05	0.000110776	6.79259	FALSE	TRUE	FALSE	FALSE
Chordc1	82.7998	-1.15902	0.000143	0.000755358	3.39018	TRUE	TRUE	TRUE	TRUE
Chp2	31.1346	1.339	0.00375	0.0129228	3.31644	TRUE	FALSE	TRUE	FALSE
Chpf	166.728	1.81255	1.95e-10	3.78e-09	7.24986	FALSE	FALSE	FALSE	FALSE
Chpf2	53.089	1.33793	0.000144775	0.00076154	5.60455	TRUE	TRUE	TRUE	FALSE
Chpt1	339.072	-0.932544	3.77e-08	4.68e-07	9.88879	TRUE	TRUE	FALSE	FALSE
Chrac1	634.743	0.445398	0.022617	0.0581739	1.85289	TRUE	FALSE	FALSE	FALSE
Chrna5	30.1623	-1.36382	0.00677	0.021297	1.21681	FALSE	FALSE	TRUE	FALSE
Chrne	194.593	0.78504	0.00459536	0.0153689	1.79356	FALSE	FALSE	FALSE	FALSE
Chst5	3.67438	4.32523	0.00831257	0.0252617	1.51023	FALSE	FALSE	TRUE	FALSE
Chst7	220.214	-8.07644	5.36e-55	4.23e-52	5.48293	TRUE	TRUE	FALSE	FALSE
Chtf18	71.342	1.62585	2.69e-07	2.78e-06	7.76855	FALSE	FALSE	FALSE	FALSE
Chuk	94.6531	-0.738833	0.00279221	0.0100467	3.74771	TRUE	TRUE	FALSE	FALSE
Churc1	41.8532	1.17118	0.0110453	0.0319522	1.67878	TRUE	TRUE	FALSE	FALSE
Ciao1	84.7036	0.711764	0.0210132	0.0547307	2.21752	FALSE	FALSE	FALSE	FALSE
Ciapin1	341.505	1.48356	5.63e-10	1e-08	3.72062	FALSE	FALSE	TRUE	FALSE
Cib1	419.735	0.58385	0.00660102	0.0208521	2.55134	FALSE	FALSE	FALSE	FALSE
Cilp2	9.9837	1.96009	0.0249	0.0631119	2.42584	FALSE	FALSE	FALSE	FALSE
Cinp	35.3894	1.05761	0.0136153	0.0381712	2.71157	TRUE	TRUE	TRUE	FALSE
Cipc	262.874	-0.773062	0.000400868	0.00186119	2.2879	TRUE	TRUE	TRUE	FALSE
Cir1	91.5687	-0.726977	0.00752929	0.0232706	3.32186	FALSE	TRUE	FALSE	FALSE
Cirbp	222.379	0.572346	0.0117	0.0335755	2.5274	TRUE	TRUE	FALSE	TRUE
Cited1	148.952	0.584012	0.0389	0.0909511	1.63772	FALSE	FALSE	FALSE	FALSE
Cited2	71.0416	0.768003	0.00769653	0.0237149	4.8939	FALSE	FALSE	TRUE	FALSE
Cited4	30.3743	2.48403	2.6e-06	2.13e-05	6.94214	FALSE	FALSE	FALSE	FALSE
Ckap2l	328.606	-0.58905	0.00124	0.00495899	2.94354	TRUE	FALSE	FALSE	FALSE
Ckap4	401.542	0.703315	0.0016091	0.00622762	2.35725	TRUE	FALSE	FALSE	FALSE
Ckap5	642.582	-0.848451	4.61e-06	3.56e-05	3.59806	TRUE	TRUE	FALSE	FALSE
Chkb	13.5901	2.04396	0.00507952	0.0167143	3.57732	FALSE	FALSE	FALSE	FALSE
Cmtm2a	228.46	-0.550623	0.0123951	0.0352241	2.14133	TRUE	FALSE	FALSE	FALSE
Ckmt2	65.7547	-0.726707	0.0131532	0.0370874	2.40864	FALSE	FALSE	FALSE	FALSE
Clasrp	111.291	0.968391	0.00114625	0.00464712	3.11211	FALSE	FALSE	FALSE	FALSE
Clca3a1	16.5987	-1.58177	0.0106725	0.0310816	2.95469	FALSE	FALSE	TRUE	FALSE
Clcn3	288.168	-1.33388	2.58e-15	1.04e-13	10.012	TRUE	TRUE	TRUE	FALSE
Clcn4	173.596	-0.72668	0.000183368	0.000937849	8.20045	TRUE	TRUE	TRUE	FALSE
Clcnkb	8.1203	-5.58113	9.91e-06	7.09e-05	3.1768	FALSE	FALSE	FALSE	FALSE
Cldn15	8.26701	-1.9966	0.0147	0.040609	5.16259	FALSE	FALSE	FALSE	FALSE
Cldn3	127.184	1.39313	2.94e-08	3.74e-07	6.55929	FALSE	FALSE	FALSE	FALSE
Cldn34a	15.52	-1.87327	0.00140212	0.00553387	2.27875	FALSE	FALSE	FALSE	FALSE
Cldn34b1	24.3568	-1.70744	9.98e-05	0.000548464	4.19901	FALSE	TRUE	FALSE	FALSE
Cldn34b2	10.4283	-1.52179	0.0249158	0.0630952	1.92015	FALSE	FALSE	FALSE	FALSE
Cldn34b3	26.0755	-1.73611	0.00045912	0.00208834	1.79145	FALSE	FALSE	FALSE	FALSE
Cldn34b4	61.2308	-2.18589	2.03e-07	2.15e-06	2.25263	FALSE	FALSE	FALSE	FALSE
Cldn34c1	19.0991	-6.25224	4.97e-11	1.06e-09	47.7396	FALSE	FALSE	TRUE	FALSE
Cldn34c4	50.0195	-1.74483	0.000236	0.0011725	1.54451	FALSE	FALSE	FALSE	FALSE
Cldn34d	53.0764	-1.19184	0.00157733	0.00611578	1.94406	FALSE	FALSE	FALSE	FALSE
Cldn5	20.3788	2.95267	2.5e-05	0.000160169	4.48312	FALSE	FALSE	FALSE	FALSE
Clec10a	3.78809	3.28403	0.0267	0.066764	5.01243	FALSE	FALSE	FALSE	FALSE
Clec12b	43.0226	-0.844997	0.0226567	0.0582594	1.91271	FALSE	FALSE	FALSE	FALSE
Clec3b	6.04036	2.35977	0.0359932	0.0854868	2.05702	FALSE	TRUE	FALSE	FALSE
Aunip	150.581	-1.87758	7.24e-12	1.81e-10	3.15341	FALSE	FALSE	FALSE	FALSE
Clic1	85.336	1.06439	0.000192837	0.00098296	4.78238	FALSE	FALSE	FALSE	FALSE
Clic4	285.244	0.462783	0.0107652	0.0312784	3.63109	TRUE	TRUE	TRUE	FALSE
Clint1	228.147	0.665249	0.000259	0.00126737	11.9965	TRUE	FALSE	FALSE	FALSE
Clip1	631.526	-0.452822	0.0292	0.0719541	2.09641	FALSE	FALSE	TRUE	FALSE
Clk1	120.784	-2.37529	2.16e-15	8.79e-14	3.42349	FALSE	FALSE	FALSE	FALSE
Clk4	224.42	-1.82093	9.23e-11	1.9e-09	2.40807	FALSE	FALSE	FALSE	FALSE
Clmn	1281.02	0.909349	2.91e-05	0.000183256	2.62635	TRUE	TRUE	TRUE	FALSE
Cln5	35.6812	-0.790115	0.0425	0.0978117	2.38928	FALSE	TRUE	TRUE	FALSE
Cln6	151.703	0.930993	0.000395047	0.00184068	3.09184	FALSE	FALSE	FALSE	FALSE
Clock	256.318	-1.63525	8.18e-12	2.01e-10	3.63613	TRUE	TRUE	TRUE	FALSE
Clp1	152.533	-0.851426	0.00128004	0.00510864	3.21439	FALSE	FALSE	TRUE	FALSE
Clpb	2164.33	0.584061	0.000518	0.0023193	3.08804	TRUE	TRUE	TRUE	FALSE
Clpp	42.7744	1.65472	4.95e-05	0.000293587	4.45691	FALSE	FALSE	FALSE	FALSE
Clptm1	398.495	1.39358	1.9e-15	7.81e-14	13.0143	TRUE	TRUE	TRUE	FALSE
Clptm1l	418.707	0.496	0.00211	0.0078781	5.36385	FALSE	FALSE	FALSE	FALSE
Clrn1	5.69373	-2.17579	0.0177224	0.0476628	5.2693	TRUE	FALSE	TRUE	FALSE
Clstn1	170.273	2.49111	1.64e-21	1.44e-19	8.13581	FALSE	FALSE	FALSE	FALSE
Clstn2	109.774	-5.37328	1.09e-52	7.35e-50	9.36854	TRUE	TRUE	TRUE	FALSE
Clstn3	26.7502	1.50721	0.00390331	0.0133644	2.78911	FALSE	FALSE	FALSE	FALSE
Clta	55.9653	1.99714	1e-07	1.13e-06	6.78287	FALSE	FALSE	FALSE	FALSE
Cltb	58.7157	1.97388	1.62e-08	2.18e-07	13.3948	TRUE	TRUE	TRUE	FALSE
Cltc	1100.08	-0.514379	0.00274855	0.00990732	2.33727	TRUE	TRUE	FALSE	TRUE
Clu	3254.14	0.965585	4.13e-16	1.88e-14	19.2097	FALSE	FALSE	FALSE	FALSE
Cluap1	259.63	-0.763834	0.00191	0.00722939	1.82836	FALSE	TRUE	FALSE	FALSE
Cluh	351.14	1.15857	2.91e-10	5.45e-09	7.82326	TRUE	FALSE	TRUE	FALSE
Cmas	80.4029	0.795854	0.0031	0.0109912	7.91354	FALSE	FALSE	FALSE	FALSE
Cmc2	53.5225	0.810513	0.0312751	0.0762343	1.90957	FALSE	TRUE	FALSE	FALSE
Cmip	60.3127	0.82277	0.00735353	0.0228089	5.55976	FALSE	FALSE	TRUE	FALSE
Cmklr1	87.9367	0.607317	0.0401	0.0933931	1.93688	FALSE	TRUE	FALSE	FALSE
Cmpk2	16.8287	-1.40569	0.00773	0.0237938	3.17243	TRUE	TRUE	TRUE	FALSE
Cmtm1	136.575	-0.611637	0.0110041	0.0318433	2.09788	FALSE	FALSE	FALSE	FALSE
Cmtm2a	2678.34	-1.04393	5e-14	1.71e-12	6.47552	TRUE	FALSE	FALSE	FALSE
Cmtm7	9.8952	2.72355	0.0032	0.0113061	5.48048	FALSE	FALSE	FALSE	FALSE
Cnep1r1	84.2534	-1.38586	4.1e-07	4.02e-06	7.64366	TRUE	TRUE	TRUE	FALSE
Cnga3	81.3529	2.16898	6.05e-10	1.07e-08	5.03538	FALSE	FALSE	TRUE	FALSE
Cnga4	13.2606	-1.35024	0.0325	0.0786652	2.11904	FALSE	FALSE	FALSE	FALSE
Cngb3	72.0016	-2.54113	7.39e-08	8.57e-07	1.46754	TRUE	FALSE	TRUE	FALSE
Cnksr1	11.1822	3.32626	0.00113289	0.00459813	4.06147	FALSE	FALSE	FALSE	FALSE
Cnksr3	50.3653	0.682263	0.0471828	0.10652	2.56319	FALSE	TRUE	TRUE	FALSE
Cnn3	22.8783	1.33184	0.0133	0.0373265	2.79692	TRUE	TRUE	FALSE	FALSE
Cnnm1	34.5346	0.875106	0.0297543	0.0732151	3.32252	FALSE	FALSE	FALSE	FALSE
Cnnm3	33.7328	0.870725	0.037	0.0874846	2.59525	TRUE	TRUE	TRUE	FALSE
Cnnm4	146.288	0.696462	0.0104914	0.0306529	2.03695	FALSE	FALSE	TRUE	FALSE
Cnot1	2904.06	-0.87704	2.15e-07	2.27e-06	4.91007	TRUE	FALSE	FALSE	FALSE
Cnot11	93.4301	1.03177	6.06e-05	0.000351856	12.4149	FALSE	FALSE	FALSE	FALSE
Cnot2	263.224	-0.798355	2.39e-05	0.00015438	3.98655	TRUE	FALSE	FALSE	FALSE
Cnot3	61.884	1.30714	0.00253806	0.00924026	2.48269	TRUE	FALSE	FALSE	FALSE
Cnot4	510.2	-1.29313	1.1e-12	3.13e-11	10.1771	TRUE	FALSE	TRUE	FALSE
Cnot6	302.359	-1.39383	4.89e-15	1.9e-13	7.42048	TRUE	TRUE	TRUE	FALSE
Cnot6l	176.36	-0.857295	0.000429487	0.00197632	2.84153	FALSE	TRUE	TRUE	FALSE
Cnot7	274.311	-1.26011	9.92e-09	1.39e-07	4.69553	TRUE	FALSE	TRUE	FALSE
Cnp	25.2168	1.56047	0.00895	0.0268635	2.63802	TRUE	FALSE	TRUE	FALSE
Cnppd1	169.085	0.491586	0.0179	0.0481583	3.8184	FALSE	FALSE	FALSE	FALSE
Cnpy2	23.8255	1.18375	0.0178	0.0479524	2.92504	FALSE	TRUE	FALSE	FALSE
Cnpy3	60.6571	0.919369	0.00643255	0.0204087	3.06255	FALSE	TRUE	FALSE	FALSE
Cnst	173.53	-0.545129	0.0426018	0.0980797	1.72842	TRUE	FALSE	TRUE	FALSE
Cntd1	368.802	-0.824859	0.00031098	0.00148673	2.51906	TRUE	TRUE	FALSE	FALSE
Cntfr	18.014	2.53332	0.000238	0.00118152	4.35144	FALSE	FALSE	TRUE	FALSE
Cntln	260.309	-1.42851	4.65e-10	8.39e-09	3.73938	TRUE	TRUE	FALSE	FALSE
Cntn1	43.0792	-1.0234	0.0183106	0.0489188	1.64444	TRUE	FALSE	TRUE	FALSE
Cntn4	3.70822	-2.81526	0.0186999	0.0497614	3.76642	TRUE	FALSE	TRUE	FALSE
Cntn6	34.2344	-1.14639	0.00169774	0.0065428	4.65201	FALSE	FALSE	FALSE	FALSE
Cntnap3	4.53861	-2.17377	0.0453747	0.103208	1.56003	TRUE	TRUE	FALSE	TRUE
Cntnap4	5.03626	-2.0096	0.04	0.0933732	1.83289	TRUE	FALSE	TRUE	FALSE
Cntnap5b	377.164	-0.968502	2.11e-05	0.000138251	2.42462	TRUE	TRUE	FALSE	FALSE
Cntrl	411.091	-0.783594	0.000257041	0.00125935	3.38701	FALSE	FALSE	FALSE	FALSE
Coa3	62.0297	1.27032	0.000163581	0.00085078	3.86608	FALSE	FALSE	FALSE	FALSE
Coa5	218.521	-0.639851	0.00297616	0.010612	2.52457	TRUE	FALSE	TRUE	FALSE
Coasy	76.2028	1.09959	0.000238819	0.00118347	4.94345	FALSE	FALSE	TRUE	FALSE
Cobll1	35.9142	1.32426	0.00443653	0.0149035	2.29776	TRUE	TRUE	FALSE	FALSE
Cog2	148.26	0.74416	0.00458	0.0153248	2.67709	TRUE	TRUE	FALSE	TRUE
Cog5	144.218	-0.691363	0.00301763	0.0107387	2.36089	FALSE	FALSE	TRUE	FALSE
Cog6	1012.07	-0.632033	1.79e-05	0.000119419	4.44804	TRUE	FALSE	FALSE	FALSE
Cog7	179.696	0.637847	0.00899758	0.0269734	2.45133	TRUE	FALSE	FALSE	FALSE
Cog8	315.704	0.947663	7.96e-08	9.19e-07	8.17675	FALSE	FALSE	FALSE	FALSE
Col10a1	9.26551	-3.15887	0.000711569	0.0030691	1.59066	FALSE	FALSE	TRUE	FALSE
Col18a1	61.6356	1.62837	4.88e-05	0.000289573	4.00058	TRUE	FALSE	FALSE	FALSE
Col1a2	89.4185	0.985745	0.0483195	0.108735	1.3157	TRUE	FALSE	TRUE	FALSE
Col20a1	259.484	0.426361	0.0428	0.098497	1.87349	FALSE	TRUE	FALSE	FALSE
Col22a1	701.927	-0.653047	3.84e-05	0.000234697	5.2817	FALSE	TRUE	TRUE	FALSE
Col25a1	19.919	-2.63649	2.92e-05	0.000183405	3.34272	TRUE	TRUE	TRUE	FALSE
Col26a1	53.1816	-0.91353	0.00324057	0.0114203	4.8787	TRUE	FALSE	FALSE	FALSE
Col27a1	40.5956	-1.95618	1.59e-05	0.000107999	1.77311	TRUE	TRUE	FALSE	FALSE
Col2a1	126.072	0.568852	0.0249	0.0631119	2.23859	TRUE	FALSE	TRUE	FALSE
Col4a1	75.5828	0.822516	0.00666443	0.0210159	2.99882	TRUE	TRUE	TRUE	FALSE
Col4a2	85.3738	1.23653	0.000192215	0.000980066	2.9843	FALSE	FALSE	TRUE	FALSE
Col4a3	60.5258	-1.23252	0.000300774	0.00144402	2.1061	TRUE	FALSE	TRUE	FALSE
Cert1	294.896	-0.655787	0.00654697	0.0207066	1.74515	TRUE	FALSE	TRUE	FALSE
Col6a1	42.9891	2.23031	1.67e-05	0.000112116	3.83314	FALSE	FALSE	FALSE	FALSE
Col6a6	49.4078	-3.23815	5.04e-14	1.72e-12	4.67194	FALSE	FALSE	FALSE	FALSE
Col7a1	17.2788	-1.47581	0.00752654	0.0232661	2.68248	FALSE	FALSE	FALSE	FALSE
Col9a3	33.6454	-0.750745	0.0456	0.103615	2.92966	TRUE	FALSE	FALSE	FALSE
Colgalt1	121.372	0.859534	0.000177317	0.000912038	11.3278	FALSE	TRUE	TRUE	FALSE
Commd3	188.457	-0.580961	0.0112989	0.0325822	1.98027	FALSE	FALSE	FALSE	FALSE
Commd5	53.4781	1.28132	0.000428815	0.00197372	3.48	FALSE	TRUE	FALSE	FALSE
Commd8	44.2653	-1.31129	0.000265743	0.00129465	4.25097	TRUE	TRUE	TRUE	TRUE
Commd9	55.5682	0.995727	0.00308	0.0109529	4.04804	FALSE	FALSE	TRUE	FALSE
Comp	635.062	1.11044	6.44e-10	1.13e-08	4.85265	TRUE	FALSE	FALSE	FALSE
Comt	27.479	2.05665	0.000104	0.000570428	3.70947	TRUE	TRUE	TRUE	TRUE
Copb1	286.953	-0.558786	0.00285954	0.0102525	2.71772	TRUE	FALSE	FALSE	FALSE
Cope	134.155	1.75621	5.82e-12	1.49e-10	7.51976	TRUE	TRUE	TRUE	FALSE
Coprs	144.99	0.610658	0.0206	0.053814	2.05781	FALSE	FALSE	FALSE	FALSE
Cops2	429.938	-1.4516	1.96e-07	2.09e-06	2.0841	TRUE	FALSE	TRUE	FALSE
Cops3	411.035	-0.773779	0.000109539	0.000595987	2.64479	FALSE	FALSE	FALSE	FALSE
Cops6	267.514	0.701631	0.000255037	0.00125189	5.09115	FALSE	FALSE	FALSE	FALSE
Cops7a	687.964	0.477948	0.0138	0.0385881	2.25768	FALSE	FALSE	FALSE	FALSE
Copz2	18.3399	1.55174	0.00765	0.0235852	3.41202	FALSE	FALSE	FALSE	FALSE
Coq10b	149.735	-0.813601	0.000901	0.00376445	2.15456	FALSE	TRUE	FALSE	FALSE
Coq2	38.0284	1.12793	0.00406176	0.013808	4.88276	FALSE	FALSE	TRUE	FALSE
Coq9	158.291	1.33373	7.28e-07	6.73e-06	4.3666	TRUE	FALSE	TRUE	FALSE
Coro1a	6.02293	3.06351	0.0183441	0.0489867	2.8242	FALSE	FALSE	FALSE	FALSE
Coro1b	267.686	1.73985	7.42e-12	1.84e-10	3.72265	TRUE	FALSE	FALSE	FALSE
Coro1c	88.711	0.908915	0.00287804	0.0103147	2.63576	TRUE	FALSE	TRUE	FALSE
Coro2a	489.763	0.56599	0.0022011	0.00817403	3.04574	FALSE	FALSE	TRUE	FALSE
Coro2b	7.97756	2.34436	0.0167296	0.0454709	3.34142	FALSE	FALSE	FALSE	FALSE
Cotl1	45.4273	2.0397	5.87e-07	5.56e-06	6.45182	FALSE	FALSE	FALSE	FALSE
Cox10	71.9492	0.72661	0.00871817	0.0262528	11.0902	FALSE	FALSE	TRUE	FALSE
Cox11	61.154	-0.627846	0.0460477	0.104386	1.54564	TRUE	FALSE	TRUE	FALSE
Cox14	41.4094	1.83218	9.4e-05	0.000519487	3.0256	FALSE	FALSE	TRUE	FALSE
Cox15	36.3518	1.01215	0.0121837	0.0347502	3.50268	TRUE	TRUE	TRUE	FALSE
Cox16	24.1813	-1.06218	0.0234969	0.0600039	1.71959	TRUE	TRUE	TRUE	TRUE
Cox20	50.7764	-1.28432	0.000389397	0.0018169	2.02158	FALSE	FALSE	FALSE	FALSE
Cox4i1	823.686	1.94776	5.83e-19	3.89e-17	4.372	FALSE	FALSE	FALSE	FALSE
Cox5a	410.299	1.55339	6.49e-16	2.85e-14	9.74202	FALSE	FALSE	FALSE	FALSE
Cox5b	254.77	1.68754	1.26e-09	2.1e-08	4.6675	FALSE	FALSE	FALSE	FALSE
Cox6a1	371.433	2.39372	7.03e-29	1.3e-26	6.6654	FALSE	FALSE	FALSE	FALSE
Cox6b1	72.771	1.40681	3.75e-05	0.000230127	3.50698	FALSE	FALSE	FALSE	FALSE
Cox6b2	638.915	1.03982	4.68e-08	5.67e-07	3.79175	FALSE	TRUE	FALSE	FALSE
Cox6c	410.67	-0.820347	0.00280593	0.0100858	1.4467	FALSE	TRUE	FALSE	FALSE
Cox7a1	5.70001	2.93403	0.0223686	0.0576412	3.52041	FALSE	FALSE	FALSE	FALSE
Cox7b2	377.845	-1.86718	7.88e-11	1.64e-09	2.18954	TRUE	FALSE	FALSE	FALSE
Cox8a	101.361	0.98165	0.000203057	0.00102808	4.97586	FALSE	FALSE	FALSE	FALSE
Cpa5	277.016	-0.484616	0.0103	0.0301008	2.57941	FALSE	FALSE	TRUE	FALSE
Cpa6	25.3708	-2.05719	1.22e-05	8.51e-05	2.9034	TRUE	TRUE	FALSE	FALSE
Cpd	281.6	-0.841744	6.05e-06	4.55e-05	5.49113	TRUE	TRUE	TRUE	FALSE
Cpe	293.181	1.58932	2.2e-18	1.33e-16	22.3046	FALSE	FALSE	TRUE	FALSE
Cpeb3	425.649	0.888142	1.49e-05	0.000101429	3.78848	FALSE	FALSE	TRUE	FALSE
Cpeb4	382.015	-1.38947	7.63e-11	1.59e-09	7.95165	FALSE	FALSE	TRUE	FALSE
Cplx2	3.37898	4.21742	0.00912919	0.0272883	2.44494	FALSE	TRUE	TRUE	FALSE
Cpne3	49.2384	-0.873058	0.00743	0.0230065	2.59705	TRUE	TRUE	TRUE	FALSE
Cpne5	58.8787	-1.27489	1.5e-05	0.000102279	6.19278	TRUE	TRUE	TRUE	FALSE
Cpne7	8.10679	2.83897	0.0168504	0.0457444	1.47679	FALSE	TRUE	FALSE	FALSE
Cpne9	12.2111	-2.49304	8.59e-05	0.000480201	3.25987	FALSE	FALSE	TRUE	FALSE
Cpped1	37.6957	1.10263	0.00496	0.01639	4.56327	TRUE	FALSE	TRUE	FALSE
Cpsf1	320.442	0.876485	4.63e-06	3.57e-05	5.7107	FALSE	FALSE	FALSE	FALSE
Cpsf2	208.738	-0.418853	0.0222	0.0572362	4.64714	FALSE	FALSE	TRUE	FALSE
Cpsf3	166.103	0.479177	0.0184484	0.0492365	5.06421	FALSE	FALSE	FALSE	FALSE
Ints11	87.6976	1.38999	7.58e-05	0.000429563	2.72059	FALSE	FALSE	FALSE	FALSE
Cpsf4	54.2436	1.02602	0.0039321	0.0134427	3.06602	FALSE	FALSE	TRUE	FALSE
Cpsf6	193.465	-0.81014	0.000233108	0.00116024	4.90991	TRUE	TRUE	TRUE	TRUE
Cpt1a	170.589	0.666465	0.00502529	0.0165839	2.62173	FALSE	TRUE	TRUE	FALSE
Cptp	540.138	0.606023	0.000553	0.00246153	3.90827	FALSE	FALSE	TRUE	FALSE
Cpxcr1	151.76	-2.39848	9.41e-10	1.59e-08	1.74028	TRUE	TRUE	FALSE	FALSE
Cpxm1	132.147	1.07492	0.000186948	0.000955356	3.10963	TRUE	TRUE	FALSE	FALSE
Cr2	12.0329	-2.71713	0.000462	0.00210054	1.64789	TRUE	FALSE	TRUE	FALSE
Crabp1	13.4818	2.47324	0.00444728	0.0149314	3.32076	FALSE	FALSE	FALSE	FALSE
Crat	2243.61	0.689972	0.000752	0.00321819	2.04119	TRUE	FALSE	TRUE	FALSE
Crb1	29.8225	-1.79491	0.000245997	0.00121342	2.06231	TRUE	FALSE	FALSE	FALSE
Crbn	293.562	-1.25733	4.32e-06	3.35e-05	2.24093	TRUE	TRUE	TRUE	TRUE
Creb1	109.707	-1.08222	5.36e-06	4.08e-05	4.20203	TRUE	TRUE	TRUE	FALSE
Creb3	108.661	0.720647	0.011949	0.0341585	2.17269	FALSE	FALSE	TRUE	FALSE
Creb3l1	40.5628	2.61397	1.32e-07	1.45e-06	5.42137	FALSE	FALSE	FALSE	FALSE
Creb3l3	6.62318	-1.83649	0.0296465	0.0729794	2.79003	FALSE	FALSE	FALSE	FALSE
Creb5	2.45783	-4.74989	0.0115546	0.0331982	1.56152	TRUE	FALSE	TRUE	FALSE
Crebrf	779.644	-1.48645	1.6e-18	9.85e-17	5.3174	FALSE	TRUE	TRUE	TRUE
Crebzf	285.574	-2.08354	4.24e-25	5.38e-23	6.17248	TRUE	TRUE	TRUE	FALSE
Creg1	226.342	1.04622	5.14e-08	6.18e-07	11.5109	FALSE	FALSE	FALSE	FALSE
Creld2	505.73	1.0194	1.12e-05	7.89e-05	3.88912	FALSE	FALSE	FALSE	FALSE
Crem	701.2	-0.864441	8.54e-06	6.2e-05	2.73822	TRUE	TRUE	TRUE	FALSE
Crip1	13.683	1.46784	0.021	0.0546556	7.06191	TRUE	TRUE	FALSE	FALSE
Crip2	213.835	1.55715	2.83e-14	1e-12	12.066	TRUE	TRUE	FALSE	TRUE
Cript	192.899	-1.07408	3.13e-06	2.51e-05	2.80663	TRUE	TRUE	FALSE	FALSE
Crisp1	2.2831	-3.7334	0.000147178	0.000781953	2.93825	TRUE	FALSE	FALSE	FALSE
Crisp2	6914.96	-1.72371	1.92e-08	2.54e-07	1.74396	TRUE	FALSE	TRUE	FALSE
Crlf1	159	0.783574	0.00190221	0.00721752	2.63088	FALSE	FALSE	FALSE	FALSE
Crlf2	80.5148	1.75847	6.48e-07	6.07e-06	4.19286	FALSE	TRUE	FALSE	FALSE
Crlf3	24.1593	1.3185	0.00543009	0.0176948	15.2871	FALSE	FALSE	FALSE	FALSE
Crls1	318.271	-0.742191	0.00212	0.00793168	1.82222	TRUE	TRUE	TRUE	FALSE
Crnkl1	192.216	-0.494528	0.0175448	0.0473044	2.2428	TRUE	FALSE	FALSE	FALSE
Crot	58.9303	-0.779878	0.0369285	0.08732	1.40316	FALSE	FALSE	TRUE	FALSE
Crp	3.76503	-2.72957	0.0284327	0.0704497	1.35204	FALSE	TRUE	TRUE	FALSE
Crtap	70.0189	0.902582	0.00152	0.00593818	11.5595	TRUE	FALSE	FALSE	FALSE
Crtc1	44.5954	1.12557	0.0034	0.0118972	3.4146	TRUE	TRUE	TRUE	FALSE
Crtc3	61.2117	0.825291	0.0265	0.0663729	1.84815	TRUE	TRUE	TRUE	TRUE
Cry1	169.634	0.756132	0.000182408	0.000933466	11.0588	FALSE	FALSE	TRUE	FALSE
Cryab	4.78631	3.64654	0.0153869	0.0422766	1.89258	FALSE	FALSE	FALSE	FALSE
Crybg3	904.307	-1.00386	3.12e-08	3.94e-07	5.67399	FALSE	FALSE	FALSE	FALSE
[truncated: 6,132 more rows]

## Sheet: dKO
Symbol	baseMean	log2FoldChange	pvalue	padj	Cohen_d	microrna.org	Targetscan	mirwalk	mirdb
0610009B22Rik	118.075	-0.684779	0.0334032	0.0993225	1.24397	TRUE	TRUE	TRUE	TRUE
0610009L18Rik	241.702	-0.468116	0.0214136	0.0700144	2.04838	TRUE	TRUE	FALSE	FALSE
Dele1	334.236	0.886724	9.29e-07	1.37e-05	5.49624	TRUE	TRUE	TRUE	FALSE
Sanbr	545.563	-0.512144	0.042582	0.119552	1.26035	TRUE	FALSE	FALSE	FALSE
0610010K14Rik	29.9309	1.27783	0.00761556	0.0307844	2.55553	TRUE	TRUE	FALSE	FALSE
0610039H22Rik	2.57352	-5.29995	0.015757	0.055251	0.798255	TRUE	FALSE	FALSE	FALSE
0610040B10Rik	25.4352	-0.840255	0.0376701	0.10887	3.40036	TRUE	FALSE	FALSE	FALSE
1110004F10Rik	158.626	-0.706574	0.000794476	0.00484787	2.41664	TRUE	TRUE	TRUE	TRUE
1110006O24Rik	161.723	-0.918133	0.000906948	0.00539352	1.68819	FALSE	FALSE	FALSE	FALSE
Prorp	67.0118	-0.670351	0.0201512	0.066796	1.92749	TRUE	FALSE	FALSE	FALSE
1110020A21Rik	275.185	1.0467	5.95e-05	0.000525965	2.48228	FALSE	FALSE	FALSE	FALSE
Virma	451.768	-0.330125	0.0371759	0.107835	1.81272	TRUE	FALSE	TRUE	FALSE
1110038B12Rik	39.2179	-0.653782	0.0492569	0.132986	4.87687	FALSE	FALSE	FALSE	FALSE
1110038F14Rik	24.0731	1.07962	0.0219504	0.0714366	3.98621	TRUE	TRUE	TRUE	FALSE
1110059E24Rik	95.7846	-1.25024	7.23e-06	8.29e-05	2.36492	TRUE	TRUE	TRUE	FALSE
Smim45	14.3046	3.91414	0.00118413	0.00675571	2.48136	TRUE	FALSE	FALSE	FALSE
1600010M07Rik	2.4506	-3.65282	0.0112938	0.0421147	3.59126	FALSE	FALSE	FALSE	FALSE
1600012H06Rik	61.745	-0.762407	0.0135647	0.0488712	1.63515	TRUE	TRUE	TRUE	TRUE
1600014C10Rik	36.7506	2.05651	0.000303858	0.0021379	3.00803	TRUE	TRUE	TRUE	FALSE
1700001J03Rik	527.242	-1.12654	5.52e-06	6.59e-05	2.31547	FALSE	FALSE	FALSE	FALSE
1700001J11Rik	2103.8	-0.831439	3.25e-05	0.000311067	2.58182	FALSE	FALSE	FALSE	FALSE
1700001L05Rik	2526.29	-0.391752	0.00108408	0.00628152	3.3532	FALSE	FALSE	FALSE	FALSE
1700001L19Rik	336.821	0.411686	0.0127274	0.0464203	3.29265	FALSE	TRUE	TRUE	TRUE
1700001O22Rik	1001.82	0.608272	0.000318323	0.00221238	3.46907	FALSE	TRUE	TRUE	FALSE
1700003C15Rik	4.29067	-2.62083	0.00717786	0.0293927	2.35736	FALSE	FALSE	FALSE	FALSE
1700003E16Rik	2567.34	0.715436	2.22e-08	4.72e-07	7.15431	FALSE	TRUE	FALSE	FALSE
1700003F12Rik	874.014	0.535008	7.62e-05	0.000656657	4.63875	FALSE	FALSE	FALSE	FALSE
1700003I22Rik	87.1971	-1.19717	3.21e-05	0.000307081	2.25245	TRUE	FALSE	FALSE	FALSE
1700003L19Rik	19.3805	-1.03051	0.0468845	0.128239	1.17865	TRUE	FALSE	FALSE	FALSE
1700003P14Rik	209.042	-2.36878	3.93e-11	1.35e-09	2.01741	TRUE	FALSE	FALSE	FALSE
1700006A11Rik	979.241	-0.898156	1.32e-05	0.000140154	2.42252	TRUE	TRUE	TRUE	TRUE
1700007F19Rik	48.2943	-6.1712	8.12e-29	1.53e-26	5.93522	FALSE	FALSE	FALSE	FALSE
Pierce1	109.442	1.28995	7.31e-07	1.1e-05	6.23703	FALSE	FALSE	FALSE	FALSE
1700008J07Rik	243.463	0.790864	1.77e-05	0.000181646	5.37888	FALSE	FALSE	FALSE	FALSE
1700008K24Rik	1668.72	-0.456594	0.00221163	0.0113181	3.37881	FALSE	FALSE	FALSE	FALSE
1700008O03Rik	93.0725	0.599784	0.0273379	0.0848634	2.48481	TRUE	TRUE	TRUE	FALSE
1700008P02Rik	329.812	-0.783593	0.00695009	0.0286205	1.55232	FALSE	TRUE	TRUE	FALSE
1700009C05Rik	145.061	-1.36993	1.16e-08	2.63e-07	4.17521	FALSE	FALSE	FALSE	FALSE
1700009J07Rik	714.537	-0.468266	0.0243315	0.0774593	1.8914	TRUE	TRUE	FALSE	FALSE
1700009N14Rik	2701.98	0.768584	1.12e-08	2.56e-07	5.18043	TRUE	TRUE	TRUE	TRUE
1700010B08Rik	581.22	0.525364	0.00381854	0.0176168	2.3242	TRUE	TRUE	FALSE	FALSE
1700010D01Rik	277.564	-1.80469	5.07e-06	6.14e-05	1.8621	TRUE	TRUE	FALSE	TRUE
1700010I02Rik	9.65505	-8.17222	2.33e-09	5.99e-08	3.13143	FALSE	FALSE	FALSE	FALSE
1700010J16Rik	76.2712	-1.18723	0.000213532	0.00158421	2.04157	TRUE	FALSE	FALSE	FALSE
Stpg4	1131.95	-0.780463	0.00154875	0.00843334	1.72006	FALSE	FALSE	FALSE	FALSE
1700011M02Rik	28.9359	-1.50675	0.00030232	0.00212996	5.07577	FALSE	FALSE	FALSE	FALSE
1700012A03Rik	933.308	-0.936642	3.55e-05	0.000334489	2.72792	TRUE	FALSE	TRUE	FALSE
1700012B07Rik	858.93	0.516977	0.0460136	0.126644	1.44465	TRUE	TRUE	TRUE	FALSE
1700012C14Rik	33.428	-1.00709	0.0202413	0.0670341	1.6258	TRUE	FALSE	FALSE	FALSE
1700013G24Rik	2165.03	0.878385	1.44e-17	1.25e-15	16.0837	FALSE	FALSE	FALSE	FALSE
1700013H16Rik	189.747	-0.905735	0.00525213	0.0228993	1.67735	FALSE	FALSE	TRUE	FALSE
Spata46	584.275	-0.634642	0.00444264	0.0199612	2.00435	FALSE	FALSE	FALSE	FALSE
Pttg1ip2	473.559	-1.06975	2.64e-06	3.47e-05	2.70554	FALSE	FALSE	FALSE	FALSE
1700015G11Rik	715.085	-0.57737	0.0388002	0.11133	1.24763	FALSE	FALSE	FALSE	FALSE
1700016K19Rik	604.883	0.912299	2.9e-09	7.37e-08	5.84696	FALSE	TRUE	FALSE	FALSE
1700016L21Rik	12.6734	-2.13892	0.00187331	0.00982745	1.28038	FALSE	FALSE	FALSE	FALSE
1700016P04Rik	452.953	-1.28514	8.71e-06	9.73e-05	2.62449	TRUE	FALSE	FALSE	FALSE
1700017B05Rik	843.441	0.894724	1.04e-08	2.39e-07	4.91177	TRUE	TRUE	TRUE	FALSE
Ms4a20	977.97	-0.480696	0.0205739	0.0679103	1.60031	FALSE	FALSE	FALSE	FALSE
1700017G19Rik	248.317	-0.568776	0.0288012	0.0883744	1.60712	FALSE	FALSE	FALSE	FALSE
1700017J07Rik	72.7228	-0.665751	0.048385	0.131038	1.10841	TRUE	FALSE	FALSE	FALSE
1700018A04Rik	102.476	-0.638981	0.0163839	0.0569133	2.29304	FALSE	FALSE	FALSE	FALSE
1700018B24Rik	391.738	0.865243	7.2e-05	0.000625728	3.61105	TRUE	FALSE	FALSE	FALSE
1700018F24Rik	201.243	-0.76364	0.00109541	0.00633468	2.80048	FALSE	FALSE	TRUE	FALSE
1700018L02Rik	462.279	0.862591	3.51e-05	0.000331647	3.29146	FALSE	FALSE	FALSE	FALSE
1700019A02Rik	528.74	-0.848716	0.00507997	0.0222551	1.36054	TRUE	TRUE	FALSE	FALSE
Tex45	293.643	0.444289	0.0114061	0.042441	3.0389	TRUE	FALSE	FALSE	FALSE
1700019G24Rik	244.714	0.700594	0.0315519	0.0949784	1.49361	FALSE	FALSE	FALSE	FALSE
Cfap157	334.753	0.44608	0.0332892	0.0990488	1.74235	FALSE	FALSE	FALSE	FALSE
1700019N19Rik	1225.42	0.503072	4.25e-05	0.000392064	5.26235	TRUE	TRUE	TRUE	FALSE
1700020A23Rik	244.743	-1.12719	0.000120176	0.000976552	2.07118	TRUE	TRUE	FALSE	FALSE
Nscme3l	876.616	-0.640797	0.000954012	0.00563484	2.27307	FALSE	FALSE	FALSE	FALSE
Oip5os1	173.07	-1.15819	0.000315828	0.00220007	1.6454	TRUE	FALSE	FALSE	FALSE
1700020N01Rik	294.531	-0.956528	6.33e-06	7.39e-05	3.32719	TRUE	TRUE	FALSE	FALSE
1700020N18Rik	209.753	-1.10168	1.21e-07	2.19e-06	3.15426	FALSE	FALSE	FALSE	FALSE
Rubcn	684.543	0.837617	2.94e-07	4.87e-06	5.73089	FALSE	FALSE	TRUE	TRUE
1700022A21Rik	682.584	0.357409	0.0265126	0.0828161	2.15379	FALSE	FALSE	FALSE	FALSE
1700022E09Rik	17.0495	-2.07761	0.000219671	0.00162141	3.0609	FALSE	FALSE	FALSE	FALSE
Efcab15	564.997	1.30913	1.02e-12	4.42e-11	6.99375	FALSE	FALSE	FALSE	FALSE
1700024G13Rik	122.821	-0.945696	0.00268018	0.0132417	1.47669	FALSE	FALSE	FALSE	FALSE
Fyb2	75.9751	-0.610136	0.0236402	0.0756544	2.01021	FALSE	TRUE	TRUE	FALSE
1700025B11Rik	73.3406	-1.40203	2.51e-05	0.000246423	4.48145	FALSE	FALSE	FALSE	FALSE
Ms4a19	269.5	-1.05449	1.53e-05	0.000159883	3.1429	TRUE	FALSE	TRUE	TRUE
1700025G04Rik	111.003	0.515572	0.0453541	0.125388	2.27655	TRUE	TRUE	TRUE	TRUE
1700025K24Rik	17.5513	-1.8274	0.00845683	0.0334298	2.55184	FALSE	FALSE	FALSE	FALSE
1700025M24Rik	81.9723	-1.80701	1.05e-08	2.39e-07	3.05751	FALSE	FALSE	FALSE	FALSE
1700026D11Rik	135.035	-0.573695	0.00783862	0.03147	2.0602	TRUE	FALSE	FALSE	FALSE
1700026J14Rik	2.7553	3.45815	0.0318049	0.0955951	2.59971	FALSE	FALSE	FALSE	FALSE
1700027F06Rik	188.459	-1.11697	1.26e-05	0.00013493	2.59313	FALSE	FALSE	FALSE	FALSE
1700027F09Rik	58.4365	-1.13707	0.00219411	0.0112359	1.63836	FALSE	FALSE	FALSE	FALSE
1700027J07Rik	3.17169	-2.65117	0.0213296	0.0698398	8.10898	FALSE	FALSE	FALSE	FALSE
1700028E10Rik	44.7845	-1.16905	0.00026932	0.0019329	3.32857	TRUE	FALSE	FALSE	FALSE
1700028J19Rik	1645	-0.723661	1.91e-06	2.62e-05	4.01632	TRUE	TRUE	FALSE	FALSE
1700028K03Rik	62.813	-0.820832	0.0138441	0.0496989	1.49493	TRUE	FALSE	TRUE	TRUE
1700028M03Rik	10.5516	-4.22612	1.81e-08	3.92e-07	8.88495	FALSE	FALSE	FALSE	FALSE
1700029F12Rik	2518.18	0.419694	0.000620503	0.00393223	3.79906	TRUE	TRUE	TRUE	FALSE
1700029H14Rik	1914.39	0.568294	0.000240393	0.00175006	3.30429	TRUE	TRUE	TRUE	FALSE
1700029M20Rik	1445.59	-0.279487	0.0256187	0.080587	2.49398	TRUE	FALSE	FALSE	FALSE
1700029N11Rik	63.6494	-2.56712	2.18e-08	4.64e-07	1.64755	TRUE	FALSE	FALSE	FALSE
Ndufb11b	403.012	-0.795421	0.000828922	0.00502209	2.19549	TRUE	FALSE	FALSE	FALSE
1700030C10Rik	36.8456	-2.49052	4.14e-05	0.000383469	3.5034	FALSE	FALSE	FALSE	FALSE
1700030F04Rik	66.9791	-1.63487	5.36e-07	8.31e-06	4.60109	FALSE	FALSE	FALSE	FALSE
1700030J22Rik	1715.51	0.886481	1.21e-14	7.12e-13	10.9238	TRUE	TRUE	TRUE	FALSE
1700030L20Rik	43.8313	1.27144	0.00660591	0.0274697	2.21193	FALSE	FALSE	FALSE	FALSE
1700030N03Rik	53.8122	-3.4694	0.0015764	0.00856021	4.75919	FALSE	FALSE	FALSE	FALSE
1700030O20Rik	39.1492	2.04277	3.58e-06	4.53e-05	8.42941	FALSE	FALSE	FALSE	FALSE
1700031F05Rik	9.64005	-1.69736	0.0198697	0.0661151	2.48152	TRUE	FALSE	TRUE	FALSE
1700031M16Rik	735.026	0.571826	0.0132719	0.0480894	1.77978	TRUE	TRUE	FALSE	FALSE
1700034E13Rik	737.858	-0.570655	0.0375831	0.108691	1.25557	FALSE	FALSE	FALSE	FALSE
1700034H15Rik	108.182	-1.21655	6.54e-09	1.56e-07	14.1412	FALSE	FALSE	FALSE	FALSE
1700034I23Rik	771.566	-1.00589	1.41e-08	3.15e-07	4.26169	TRUE	TRUE	TRUE	FALSE
1700034J05Rik	1404.27	-0.337107	0.0134299	0.0485268	2.60681	TRUE	TRUE	TRUE	TRUE
1700034K08Rik	46.715	1.15232	0.00392436	0.0180004	2.68828	FALSE	FALSE	FALSE	FALSE
1700034P13Rik	19.5516	-1.41697	0.00339394	0.0160349	2.54635	TRUE	FALSE	FALSE	FALSE
1700037H04Rik	1046.99	0.83449	5.43e-07	8.41e-06	5.50376	FALSE	FALSE	TRUE	FALSE
Slc6a21	1198.08	0.73431	2.25e-05	0.000224054	4.5233	TRUE	FALSE	TRUE	FALSE
1700041C23Rik	105.608	-1.43837	2.12e-07	3.62e-06	2.57378	FALSE	FALSE	FALSE	FALSE
1700042G15Rik	620.417	-0.526885	0.00154671	0.0084266	2.68817	FALSE	FALSE	FALSE	FALSE
1700044C05Rik	8.50664	-1.49109	0.0260516	0.0816673	2.34745	FALSE	FALSE	FALSE	FALSE
1700046C09Rik	58.1743	-1.63246	3.38e-05	0.00032129	1.83276	FALSE	FALSE	FALSE	FALSE
1700047A11Rik	30.251	-0.825131	0.0420786	0.118405	1.52388	TRUE	FALSE	FALSE	FALSE
1700047E10Rik	11.1751	-2.56626	0.00554134	0.023909	0.937534	FALSE	FALSE	FALSE	FALSE
1700047G03Rik	101.046	-1.13648	7.9e-05	0.000677181	4.48362	TRUE	FALSE	FALSE	FALSE
1700048O20Rik	121.675	-0.738268	0.00225004	0.0114676	2.72899	TRUE	FALSE	FALSE	FALSE
Zfp974	146.447	-1.55355	6.95e-14	3.66e-12	5.44322	TRUE	FALSE	TRUE	FALSE
1700052K11Rik	95.8412	1.00598	0.000172931	0.00133116	4.41239	TRUE	FALSE	FALSE	FALSE
1700056E22Rik	250.612	1.10217	6.34e-07	9.67e-06	4.23971	FALSE	FALSE	FALSE	FALSE
1700057G04Rik	266.953	-0.65633	0.000711982	0.00442588	2.84464	TRUE	FALSE	TRUE	FALSE
1700057H15Rik	8.722	-1.48922	0.0338273	0.100339	2.57847	FALSE	FALSE	FALSE	FALSE
1700060C20Rik	15.2865	-1.41773	0.00642079	0.0269207	2.04704	TRUE	FALSE	FALSE	FALSE
1700061F12Rik	166.904	-1.4766	1.29e-09	3.48e-08	3.02172	TRUE	FALSE	FALSE	FALSE
1700061I17Rik	52.2618	-4.12723	1.03e-22	1.39e-20	2.9818	FALSE	FALSE	FALSE	FALSE
1700061J23Rik	58.5537	-1.26928	0.00043557	0.0029098	1.92529	FALSE	FALSE	FALSE	FALSE
1700063D05Rik	48.661	-7.3291	1.2e-24	1.82e-22	7.76598	TRUE	FALSE	FALSE	FALSE
1700064M15Rik	271.668	-2.63116	1.29e-47	4.35e-45	8.38118	FALSE	FALSE	FALSE	FALSE
1700065I16Rik	48.517	-0.713991	0.0427084	0.119808	1.92432	TRUE	FALSE	FALSE	FALSE
1700066M21Rik	235.023	-0.816479	5.1e-05	0.000460094	2.96811	FALSE	TRUE	TRUE	FALSE
1700066O22Rik	17.1854	-1.39129	0.0108054	0.040712	1.85993	FALSE	FALSE	FALSE	FALSE
1700067G17Rik	95.1308	-1.17574	0.00126603	0.00714926	2.09004	FALSE	FALSE	FALSE	FALSE
1700067P10Rik	284.946	-0.58096	0.0176447	0.0603399	2.24378	FALSE	FALSE	FALSE	FALSE
1700069L16Rik	31.5538	-1.55681	0.000219191	0.00161896	2.56518	FALSE	FALSE	FALSE	FALSE
1700071M16Rik	164.727	-0.771514	0.00490999	0.0216611	1.64605	FALSE	FALSE	FALSE	FALSE
1700072O05Rik	33.4119	-1.07731	0.0192788	0.0645491	1.1524	TRUE	FALSE	FALSE	FALSE
Prss59	2781.44	-0.948292	0.000853667	0.00513862	1.59834	TRUE	FALSE	FALSE	FALSE
Nudt16l2	429.022	-0.447675	0.0202908	0.067137	2.08936	FALSE	FALSE	FALSE	FALSE
1700080N15Rik	26.5448	-2.01935	0.00323739	0.0154292	1.07509	FALSE	FALSE	FALSE	FALSE
1700084D21Rik	44.1682	-2.88684	9.38e-13	4.07e-11	12.3495	FALSE	FALSE	FALSE	FALSE
1700084M14Rik	195.496	-1.25818	0.00325867	0.0155122	1.37627	FALSE	TRUE	FALSE	FALSE
1700086L19Rik	575.662	0.350571	0.0212905	0.0697366	2.46802	TRUE	FALSE	FALSE	FALSE
1700088E04Rik	49.2309	-0.868781	0.00608793	0.0257977	2.60626	TRUE	TRUE	TRUE	FALSE
1700092C10Rik	73.1188	-1.31897	1.82e-05	0.000185101	2.74899	FALSE	FALSE	FALSE	FALSE
1700092M07Rik	445.32	0.575722	0.0100161	0.0383076	1.9315	FALSE	FALSE	FALSE	FALSE
1700095A21Rik	184.647	-1.50776	2.83e-06	3.67e-05	2.03704	TRUE	FALSE	FALSE	FALSE
1700096J18Rik	46.4813	-1.57654	0.00051386	0.00334946	3.28298	TRUE	FALSE	FALSE	FALSE
1700096K18Rik	48.7639	-0.869709	0.0360507	0.10524	1.25483	FALSE	FALSE	FALSE	FALSE
Cfap77	45.7379	1.42568	0.000609427	0.00387144	3.69239	TRUE	TRUE	FALSE	FALSE
1700101O22Rik	206.086	-0.664901	0.00413854	0.0188228	1.90575	FALSE	FALSE	FALSE	FALSE
Ccdc182	120.553	-0.710597	0.00495866	0.0218284	2.1057	FALSE	FALSE	FALSE	FALSE
1700109H08Rik	264.203	-0.620054	0.0385346	0.110703	1.07087	TRUE	FALSE	FALSE	FALSE
1700109K24Rik	50.6287	-2.01837	9.77e-11	3.15e-09	5.36473	TRUE	FALSE	FALSE	FALSE
1700110I01Rik	7.77936	-2.82307	0.000163194	0.00126959	12.6328	TRUE	FALSE	FALSE	FALSE
1700111N16Rik	8.57855	-1.51573	0.021099	0.0692431	5.68945	FALSE	FALSE	FALSE	FALSE
Lrmda	3.9953	-2.87079	0.0102106	0.0389128	1.39932	TRUE	FALSE	TRUE	FALSE
1700112J05Rik	29.2401	-1.88842	0.000826512	0.00501318	1.22232	FALSE	FALSE	FALSE	FALSE
1700112J16Rik	43.5548	-0.962086	0.00232082	0.0117561	3.91256	FALSE	FALSE	FALSE	FALSE
1700113H08Rik	554.413	0.54572	0.00118077	0.00674285	3.1206	TRUE	FALSE	FALSE	FALSE
1700120E14Rik	96.515	-0.694025	0.011354	0.0422644	1.63165	FALSE	FALSE	FALSE	FALSE
1700120G07Rik	41.0523	-3.46452	7.05e-13	3.09e-11	3.46005	FALSE	FALSE	FALSE	FALSE
1700123K08Rik	56.3476	-0.563867	0.0457662	0.126271	2.70624	FALSE	FALSE	FALSE	FALSE
1700123L14Rik	2663.99	0.955885	1.22e-17	1.08e-15	12.9868	FALSE	FALSE	FALSE	FALSE
1700123O12Rik	38.4645	-0.796073	0.0284289	0.0874968	1.48004	FALSE	FALSE	FALSE	FALSE
1700125H03Rik	82.3893	-0.665427	0.0254436	0.0801745	2.01679	TRUE	FALSE	FALSE	FALSE
1700125H20Rik	174.526	-0.6815	0.00553031	0.0238783	1.87017	FALSE	TRUE	FALSE	FALSE
1700129C05Rik	1885.21	-0.460427	0.0247644	0.0785498	1.4251	FALSE	FALSE	TRUE	FALSE
1810013L24Rik	901.51	-0.293939	0.0389388	0.111618	1.95695	TRUE	TRUE	TRUE	TRUE
1810014B01Rik	9.62918	-2.62335	8.82e-05	0.000745666	3.44276	TRUE	FALSE	FALSE	FALSE
Snhg16	23.2379	-0.868946	0.0360702	0.105263	2.43904	TRUE	FALSE	FALSE	FALSE
1810034E14Rik	12.5543	-1.84096	0.00111347	0.00642695	2.81321	TRUE	FALSE	FALSE	FALSE
Cfap410	89.8801	0.508834	0.0441804	0.122768	3.36631	TRUE	FALSE	TRUE	FALSE
Borcs7	59.8414	0.682555	0.0222391	0.0721702	3.44752	TRUE	TRUE	TRUE	FALSE
2010109A12Rik	56.477	-4.82736	8.52e-26	1.39e-23	2.71552	FALSE	FALSE	FALSE	FALSE
2010315B03Rik	9.51251	-1.89412	0.00769072	0.030999	1.34111	TRUE	TRUE	TRUE	FALSE
2200002J24Rik	105.197	-0.785556	0.00940187	0.0363623	1.78556	TRUE	FALSE	TRUE	FALSE
Misp3	20.4263	1.50513	0.0202891	0.067137	2.19644	FALSE	FALSE	TRUE	FALSE
Emsy	261.701	0.428134	0.00881498	0.0345983	4.75845	FALSE	TRUE	TRUE	FALSE
2210408I21Rik	517.831	-0.986047	5.17e-06	6.22e-05	2.49277	TRUE	TRUE	TRUE	FALSE
2210409D07Rik	2.831	-3.46284	0.0113234	0.0421933	1.31889	FALSE	FALSE	FALSE	FALSE
2300009A05Rik	220.499	-0.997696	3.79e-05	0.000354164	2.339	TRUE	FALSE	TRUE	FALSE
2310010J17Rik	49.5959	0.706991	0.0468023	0.128084	2.09092	FALSE	FALSE	FALSE	FALSE
2310011J03Rik	23.6283	0.961683	0.0485818	0.131494	2.27545	TRUE	TRUE	TRUE	FALSE
2310022B05Rik	95.7351	1.43667	7.19e-06	8.26e-05	3.92517	TRUE	TRUE	TRUE	FALSE
Relch	203.352	-0.692444	3.41e-05	0.000323957	6.17512	TRUE	FALSE	TRUE	TRUE
Trir	168.53	0.467506	0.0190204	0.0638597	3.12201	TRUE	TRUE	FALSE	FALSE
2310039H08Rik	83.8096	-0.855597	0.000451356	0.00300756	3.29209	FALSE	TRUE	FALSE	FALSE
Borcs8	163.747	0.392021	0.0436373	0.121796	3.72194	TRUE	FALSE	TRUE	FALSE
Borcs6	53.3013	1.35181	0.000134255	0.00107469	4.96227	TRUE	TRUE	TRUE	TRUE
2310061I04Rik	340.735	0.630935	2.24e-05	0.000223635	9.7176	FALSE	TRUE	FALSE	FALSE
Tmem94	589.082	1.26987	1.36e-15	9.23e-14	8.33454	TRUE	FALSE	FALSE	FALSE
Cplane1	1160.63	0.384623	0.00242433	0.012159	3.72716	TRUE	FALSE	FALSE	FALSE
Carnmt1	69.11	-2.58948	5.31e-17	4.25e-15	5.22802	TRUE	FALSE	TRUE	TRUE
2510003B16Rik	8.42041	-3.05305	0.00227325	0.0115697	1.03805	TRUE	FALSE	FALSE	FALSE
2510039O18Rik	132.156	1.04011	0.00029941	0.00211312	3.1228	TRUE	TRUE	TRUE	FALSE
2610005L07Rik	9.94827	-5.00734	4.16e-08	8.33e-07	3.03372	TRUE	FALSE	FALSE	FALSE
2610008E11Rik	84.1926	-0.782782	0.00135461	0.00756979	3.60438	TRUE	TRUE	TRUE	FALSE
2610037D02Rik	2.6458	-2.44827	0.043604	0.121743	3.58693	FALSE	FALSE	FALSE	FALSE
2610206C17Rik	30.0485	-2.26921	1.2e-07	2.17e-06	8.48654	TRUE	FALSE	FALSE	FALSE
Cfap418	421.96	-0.841073	2.08e-08	4.43e-07	8.93544	TRUE	FALSE	FALSE	FALSE
Zfp979	101.879	-1.52999	1.03e-07	1.88e-06	6.44149	TRUE	FALSE	TRUE	FALSE
2610524H06Rik	40.7087	-2.02755	4.33e-09	1.07e-07	8.92159	TRUE	FALSE	TRUE	TRUE
2700046G09Rik	85.7444	0.967841	0.00019179	0.00145304	9.47437	TRUE	FALSE	FALSE	FALSE
Rtraf	472.962	-0.60175	0.0222557	0.0721987	1.36628	TRUE	TRUE	TRUE	FALSE
Zfta	38.628	-1.12311	0.00350639	0.0164343	2.33767	TRUE	FALSE	FALSE	FALSE
2810002D19Rik	35.5158	-1.36768	0.000652145	0.0041	3.3766	TRUE	FALSE	FALSE	FALSE
2810013P06Rik	28.4412	1.09413	0.0115964	0.043013	6.11807	FALSE	FALSE	FALSE	FALSE
2810025M15Rik	390.368	0.82408	0.000374421	0.0025546	3.04871	TRUE	FALSE	FALSE	FALSE
2810032G03Rik	30.3196	-0.919463	0.029946	0.0912275	1.38249	TRUE	FALSE	FALSE	FALSE
2810408A11Rik	1094.62	0.730562	1.97e-06	2.69e-05	4.29548	FALSE	FALSE	FALSE	FALSE
Rex1bd	8.63123	1.93701	0.0314141	0.0946884	3.47347	FALSE	FALSE	FALSE	FALSE
2900026A02Rik	34.9061	2.16219	1.02e-05	0.000111708	6.08598	TRUE	TRUE	TRUE	TRUE
2900076A07Rik	10.3976	-1.49522	0.0173172	0.059419	3.36223	FALSE	FALSE	FALSE	FALSE
2900092C05Rik	231.256	-0.945827	0.00149313	0.0081835	1.65138	TRUE	TRUE	FALSE	FALSE
Bscl2	122.731	-1.63498	3.74e-12	1.49e-10	3.98888	FALSE	FALSE	FALSE	FALSE
3000002C10Rik	7.32287	-2.19209	0.0106147	0.0401596	1.68025	FALSE	FALSE	FALSE	FALSE
Vxn	30.5726	-1.10864	0.0110654	0.0414728	1.32071	TRUE	TRUE	TRUE	TRUE
Mir100hg	19.7775	-2.13609	0.000170265	0.00131563	4.02451	TRUE	FALSE	FALSE	FALSE
C9orf72	135.067	-0.500288	0.0168768	0.05824	2.19833	TRUE	FALSE	TRUE	TRUE
3110082I17Rik	28.4857	1.459	0.00198095	0.010318	4.27733	TRUE	TRUE	TRUE	TRUE
Armh4	4.62259	-3.12094	0.00168246	0.00905262	3.10533	TRUE	FALSE	TRUE	FALSE
3632454L22Rik	21.311	-2.45051	3.02e-07	4.98e-06	9.21132	FALSE	FALSE	FALSE	FALSE
3830403N18Rik	17.1772	-1.35949	0.00686142	0.0283257	3.07083	FALSE	FALSE	FALSE	FALSE
3830406C13Rik	427.588	-0.946834	1.88e-06	2.59e-05	3.37963	TRUE	TRUE	TRUE	FALSE
Spata6l	1232.81	0.43711	0.0287822	0.0883606	1.67733	TRUE	FALSE	FALSE	FALSE
4632427E13Rik	9.72673	-1.87884	0.00350607	0.0164343	2.49632	FALSE	FALSE	FALSE	FALSE
4632428C04Rik	24.3097	-5.15285	1.7e-16	1.29e-14	3.57495	FALSE	FALSE	FALSE	FALSE
4732471J01Rik	45.2507	-1.02723	0.0103404	0.0393007	1.23762	TRUE	FALSE	FALSE	FALSE
4833417C18Rik	11.4049	-1.37537	0.0201114	0.0667006	2.36196	TRUE	FALSE	FALSE	FALSE
4833418N02Rik	42.9976	-0.820086	0.0244623	0.0777672	2.82783	FALSE	FALSE	FALSE	FALSE
4833422M21Rik	2.71512	3.44104	0.0388947	0.111518	1.69301	FALSE	FALSE	FALSE	FALSE
Phf8-ps	394.323	-0.852066	0.0109861	0.0412567	1.24874	FALSE	FALSE	FALSE	FALSE
4921504E06Rik	246.463	-0.800118	0.0205595	0.067903	1.25166	TRUE	TRUE	TRUE	TRUE
Ttc6	181.1	0.467458	0.0176656	0.0603886	3.32707	FALSE	FALSE	FALSE	FALSE
4921511C20Rik	97.3668	-1.17441	0.0138817	0.0498045	0.975665	FALSE	FALSE	FALSE	FALSE
Tex47	371.23	-0.893247	0.00796521	0.0318521	1.22332	FALSE	TRUE	TRUE	FALSE
4921515E04Rik	31.1341	-0.949083	0.013095	0.0475995	1.96904	FALSE	FALSE	FALSE	FALSE
4921518K17Rik	13.1131	-1.70043	0.00366584	0.0170286	5.12554	FALSE	FALSE	FALSE	FALSE
4921524J17Rik	106.897	-0.610794	0.00389464	0.0178865	3.9842	TRUE	TRUE	TRUE	TRUE
4921525O09Rik	299.066	-0.524569	0.000593116	0.0037876	5.25026	TRUE	FALSE	FALSE	FALSE
4921531C22Rik	377.947	-1.66409	6.93e-23	9.58e-21	5.78867	TRUE	FALSE	FALSE	FALSE
4921536K21Rik	563.255	0.392557	0.0187135	0.0629567	2.2558	TRUE	TRUE	TRUE	FALSE
4921539E11Rik	1040.23	-0.967626	0.00338527	0.0160022	1.21894	TRUE	TRUE	TRUE	FALSE
Clec2m	6349.14	-0.653301	0.0436793	0.121861	1.01839	TRUE	FALSE	TRUE	FALSE
4930402F11Rik	16.9589	-1.37355	0.00449193	0.0201579	2.99012	FALSE	FALSE	FALSE	FALSE
4930404N11Rik	232.502	0.838889	0.000214113	0.00158757	3.20627	FALSE	FALSE	TRUE	FALSE
4930405A10Rik	23.2616	-1.06419	0.0276737	0.0857073	1.40263	FALSE	FALSE	FALSE	FALSE
4930405A21Rik	9.26715	1.61418	0.0489391	0.132265	3.57279	FALSE	FALSE	FALSE	FALSE
4930405J17Rik	35.9609	-1.22952	0.00163256	0.00882578	1.75038	FALSE	FALSE	FALSE	FALSE
4930407I10Rik	2653.83	0.536246	0.00031293	0.00218739	3.37904	FALSE	FALSE	FALSE	FALSE
4930412O13Rik	188.62	1.16834	9.98e-07	1.46e-05	4.32529	TRUE	FALSE	FALSE	FALSE
4930413G21Rik	149.707	-0.613861	0.0304295	0.0923152	1.93021	FALSE	FALSE	FALSE	FALSE
4930423M02Rik	46.544	-0.794697	0.0107568	0.0405961	3.03157	TRUE	FALSE	FALSE	FALSE
4930428D20Rik	114.805	-0.581112	0.0492437	0.13297	1.18311	FALSE	FALSE	FALSE	FALSE
4930428E07Rik	13.4422	-1.27839	0.0154294	0.0543422	5.71164	FALSE	FALSE	FALSE	FALSE
4930428G15Rik	1.92109	-3.34874	0.0425961	0.119566	1.46328	FALSE	FALSE	FALSE	FALSE
4930429F11Rik	26.8571	-1.11541	0.0438501	0.122038	1.04348	FALSE	FALSE	FALSE	FALSE
4930429F24Rik	48.1901	-1.24324	0.000465672	0.00308942	2.87156	FALSE	FALSE	FALSE	FALSE
Potefam1	963.927	-0.59333	0.0319964	0.0959447	1.1444	TRUE	FALSE	FALSE	FALSE
4930431F12Rik	31.3946	-1.66624	2.98e-05	0.00028736	2.62643	FALSE	FALSE	FALSE	FALSE
4930431P03Rik	58.7531	-1.1159	0.00131271	0.00737404	2.33825	FALSE	FALSE	FALSE	FALSE
4930433N12Rik	918.337	-4.80127	6.53e-268	1.49e-264	17.5553	FALSE	FALSE	FALSE	FALSE
4930434J06Rik	49.1685	-1.01585	0.000841439	0.00507505	3.2139	TRUE	FALSE	FALSE	FALSE
4930441J16Rik	41.3184	-0.889043	0.0425845	0.119552	1.22815	FALSE	FALSE	FALSE	FALSE
4930442J19Rik	74.8886	-4.14356	4.08e-33	9.8e-31	3.90938	TRUE	FALSE	FALSE	FALSE
4930442L01Rik	419.659	0.941108	1.19e-06	1.7e-05	4.79426	FALSE	FALSE	FALSE	FALSE
4930444F02Rik	667.46	-1.18828	3.12e-15	2e-13	6.00038	FALSE	FALSE	FALSE	FALSE
Semp2l2b	97.8244	-2.84457	2.25e-21	2.76e-19	3.69065	FALSE	FALSE	FALSE	FALSE
4930448K20Rik	153.288	-0.724364	0.0195955	0.065394	1.35943	FALSE	FALSE	FALSE	FALSE
Dnaaf8	613.168	1.48155	0.000482775	0.0031729	1.56822	TRUE	FALSE	FALSE	FALSE
4930451I11Rik	101.099	1.21796	3.68e-06	4.64e-05	6.18191	FALSE	FALSE	TRUE	FALSE
4930453N24Rik	2110.72	-0.616449	0.01037	0.0394051	1.80679	TRUE	TRUE	FALSE	FALSE
4930456L15Rik	13.6257	-1.72366	0.0407855	0.115568	1.09363	FALSE	FALSE	FALSE	FALSE
4930467D21Rik	40.7565	-1.59046	0.00235897	0.0118998	1.21588	TRUE	FALSE	FALSE	FALSE
Tex50	464.152	-0.726436	0.0355476	0.104205	1.11961	FALSE	FALSE	TRUE	FALSE
4930470P17Rik	45.431	-0.906402	0.00292796	0.0142435	3.28833	FALSE	FALSE	FALSE	FALSE
4930471G03Rik	633.018	0.352395	0.0138958	0.0498354	2.94745	TRUE	FALSE	FALSE	FALSE
4930471M09Rik	26.281	-1.15521	0.00758582	0.030705	1.8586	FALSE	FALSE	FALSE	FALSE
4930473O22Rik	75.9934	-0.996782	0.0038927	0.0178865	1.43865	FALSE	FALSE	FALSE	FALSE
4930474N05Rik	91.0228	-2.14447	1.23e-15	8.42e-14	4.18879	FALSE	FALSE	TRUE	FALSE
4930478P22Rik	68.4134	-0.941039	0.0172025	0.0591044	2.48811	TRUE	FALSE	FALSE	FALSE
4930479D17Rik	77.3345	-1.82031	9.32e-08	1.72e-06	2.87544	FALSE	FALSE	FALSE	FALSE
4930480E11Rik	42.8342	-0.831543	0.0118526	0.0437899	2.45324	TRUE	TRUE	FALSE	FALSE
4930482G09Rik	65.4727	-0.677587	0.0331702	0.0987423	1.49334	FALSE	FALSE	FALSE	FALSE
4930483J18Rik	60.9038	0.931835	0.00934324	0.0362123	2.27187	TRUE	FALSE	FALSE	FALSE
4930488L21Rik	409.205	0.579375	0.000625164	0.00395626	3.62939	FALSE	FALSE	FALSE	FALSE
Ct55	33.3139	-1.13092	0.00273816	0.0134665	2.83768	TRUE	FALSE	TRUE	FALSE
4930503E14Rik	61.8752	-1.15048	0.00857293	0.0338009	1.24164	TRUE	TRUE	TRUE	FALSE
Lypd9	201.313	0.659918	0.0461561	0.12693	1.34707	TRUE	FALSE	FALSE	FALSE
4930509E16Rik	11.4379	-1.34023	0.0315989	0.0950884	1.44315	FALSE	FALSE	FALSE	FALSE
4930509J09Rik	12.4878	-1.14604	0.0356005	0.104293	3.23185	FALSE	FALSE	FALSE	FALSE
4930511M06Rik	133.585	-0.538124	0.0162149	0.0564683	1.8896	FALSE	FALSE	FALSE	FALSE
4930513D17Rik	96.5312	-1.37099	0.00154172	0.00840385	1.22987	FALSE	FALSE	FALSE	FALSE
4930513N10Rik	329.474	0.618453	0.00117563	0.00672193	3.15687	TRUE	FALSE	FALSE	FALSE
4930515G01Rik	40.7907	-1.67734	8.95e-07	1.32e-05	3.96105	TRUE	FALSE	FALSE	FALSE
4930515L19Rik	36.6727	-1.30381	0.000924069	0.00547393	2.62371	FALSE	FALSE	FALSE	FALSE
4930519D14Rik	68.0794	-0.904181	0.00313636	0.0150399	1.96475	FALSE	FALSE	FALSE	FALSE
4930519G04Rik	301.601	-2.41176	6.51e-30	1.38e-27	4.75888	TRUE	TRUE	TRUE	FALSE
4930522H14Rik	275.724	-0.821923	0.00407314	0.0185754	1.45798	FALSE	TRUE	FALSE	FALSE
4930522O17Rik	110.682	-0.76072	0.020596	0.0679253	1.77345	TRUE	FALSE	FALSE	FALSE
4930523C07Rik	124.736	-0.601094	0.00668637	0.0277411	2.29473	TRUE	TRUE	TRUE	FALSE
4930523O13Rik	190.415	-0.87493	0.000798479	0.00486579	1.77084	FALSE	FALSE	FALSE	FALSE
Samt2b	28.7172	-1.28448	0.0122134	0.0448684	1.28639	FALSE	TRUE	TRUE	FALSE
4930524O08Rik	22.1849	-2.19232	0.00237582	0.0119683	4.19354	TRUE	FALSE	FALSE	FALSE
4930525D18Rik	230.724	-0.678459	0.00104427	0.00608329	4.12049	FALSE	FALSE	FALSE	FALSE
4930525G20Rik	224.088	-1.18875	2.4e-05	0.0002369	2.79195	FALSE	FALSE	FALSE	FALSE
4930526I15Rik	54.5204	1.04876	0.00801237	0.0320127	2.27369	TRUE	FALSE	FALSE	FALSE
4930529C04Rik	25.8851	-1.63276	0.000162945	0.00126866	4.85865	FALSE	FALSE	FALSE	FALSE
4930532I03Rik	43.873	-1.57091	4.85e-06	5.89e-05	2.78834	FALSE	FALSE	FALSE	FALSE
4930533B01Rik	52.6221	-1.25449	8.92e-06	9.94e-05	7.61766	FALSE	FALSE	FALSE	FALSE
4930533N22Rik	18.114	-2.18092	3.34e-05	0.000318287	2.31405	TRUE	FALSE	FALSE	FALSE
Tmem269	466.498	-0.58576	0.00208471	0.0107632	3.40545	TRUE	TRUE	TRUE	TRUE
4930543N07Rik	30.8229	-1.23245	0.00231395	0.0117311	2.13792	TRUE	FALSE	FALSE	FALSE
4930544G11Rik	1152.26	-0.697332	0.000300958	0.0021224	2.52793	FALSE	TRUE	TRUE	FALSE
4930544M13Rik	5.43503	-2.4539	0.00466947	0.0208113	2.22601	TRUE	FALSE	FALSE	FALSE
4930545L23Rik	111.059	-0.648768	0.00186992	0.00981357	7.58504	FALSE	FALSE	FALSE	FALSE
4930546C10Rik	9.00279	-1.78736	0.017125	0.0589083	1.32054	FALSE	FALSE	FALSE	FALSE
4930546K05Rik	16.3983	-2.04234	0.00120635	0.00686105	1.29726	FALSE	FALSE	FALSE	FALSE
4930547E14Rik	61.0915	-1.02444	0.00644376	0.0269798	1.89575	TRUE	FALSE	FALSE	FALSE
Magea13	148.699	-1.51235	3.81e-09	9.54e-08	3.69462	TRUE	FALSE	FALSE	FALSE
4930553E22Rik	33.6144	-1.16807	0.035596	0.104293	1.00439	FALSE	FALSE	FALSE	FALSE
4930554G24Rik	22.2666	-2.64699	2.21e-09	5.74e-08	5.50774	FALSE	FALSE	FALSE	FALSE
4930554I06Rik	37.2916	-3.19784	7.02e-06	8.09e-05	1.51086	TRUE	FALSE	FALSE	FALSE
4930555B11Rik	17.3458	-1.20649	0.0496576	0.13389	0.988817	FALSE	FALSE	FALSE	FALSE
4930555K05Rik	10.7498	1.56883	0.0415559	0.117242	3.01741	FALSE	FALSE	FALSE	FALSE
4930556G01Rik	10.0933	-1.51572	0.0353905	0.103876	1.28025	FALSE	FALSE	FALSE	FALSE
4930556N09Rik	29.0514	-1.87604	1.91e-06	2.62e-05	4.15286	FALSE	FALSE	FALSE	FALSE
H2al3	214.545	-1.12981	0.00541513	0.0234866	1.27265	FALSE	FALSE	FALSE	FALSE
4930558C23Rik	534.089	-1.27717	1.1e-08	2.5e-07	3.14471	FALSE	FALSE	TRUE	FALSE
4930558F17Rik	28.5465	-4.80474	5.23e-17	4.22e-15	4.68594	FALSE	FALSE	FALSE	FALSE
4930558J18Rik	116.49	-0.577481	0.0150734	0.0533458	1.68516	FALSE	FALSE	FALSE	FALSE
Fam243	1423.9	0.432018	0.000276305	0.00197449	5.20457	TRUE	TRUE	TRUE	FALSE
4930563M20Rik	10.7237	-1.9963	0.00112184	0.00646507	2.68854	FALSE	FALSE	FALSE	FALSE
Erich6b	26.7945	-0.762093	0.0467439	0.127962	3.55373	FALSE	FALSE	TRUE	FALSE
4930565N06Rik	68.5852	-2.0255	1.07e-11	4.04e-10	3.46183	FALSE	FALSE	FALSE	FALSE
4930567J20Rik	28.7955	-1.60985	4.63e-05	0.000424067	4.50322	TRUE	FALSE	FALSE	FALSE
4930567K12Rik	14.3456	-1.3522	0.0103374	0.0392977	2.74975	FALSE	FALSE	FALSE	FALSE
4930568D16Rik	74.4948	-0.666515	0.0441067	0.1226	1.11784	FALSE	TRUE	FALSE	FALSE
4930571K23Rik	3818.98	0.521398	3.63e-05	0.000341405	4.34797	FALSE	TRUE	TRUE	FALSE
4930572K03Rik	38.6649	-1.60046	5.76e-06	6.83e-05	5.37206	TRUE	FALSE	FALSE	FALSE
4930572O03Rik	4.97246	-2.28168	0.0154143	0.0542995	2.92822	FALSE	FALSE	FALSE	FALSE
4930578I06Rik	544.421	0.630018	6.22e-06	7.3e-05	6.85781	FALSE	FALSE	FALSE	FALSE
4930579G24Rik	165.828	0.723038	0.00402724	0.0184121	2.44894	TRUE	TRUE	TRUE	FALSE
4930579K19Rik	11.2474	-1.7037	0.00423787	0.0192019	3.8941	FALSE	FALSE	FALSE	FALSE
4930584F24Rik	398.444	-0.748472	0.00246954	0.0123484	1.96446	FALSE	TRUE	FALSE	FALSE
4930587E11Rik	20.5689	-1.00754	0.0228627	0.0737168	2.58583	FALSE	FALSE	FALSE	FALSE
4930590J08Rik	872.366	0.496032	0.00511611	0.0223947	2.54731	FALSE	FALSE	FALSE	FALSE
4930593A02Rik	29.8171	-1.50738	0.000339594	0.00233972	2.09164	TRUE	FALSE	FALSE	FALSE
4930595M18Rik	88.1201	-1.29355	0.00154163	0.00840385	1.45075	FALSE	FALSE	FALSE	FALSE
4930597G03Rik	12.2642	-1.26822	0.0353846	0.103876	2.48167	FALSE	FALSE	FALSE	FALSE
4931406C07Rik	113.826	0.844843	0.000186115	0.00141415	8.97957	TRUE	TRUE	TRUE	TRUE
4931408C20Rik	425.852	-0.428897	0.0069414	0.0285912	3.10891	FALSE	FALSE	FALSE	FALSE
4931408D14Rik	326.385	-1.12338	2.81e-08	5.83e-07	3.39211	FALSE	FALSE	FALSE	FALSE
Jkampl	334.907	-1.54449	1.03e-11	3.89e-10	7.96569	FALSE	FALSE	FALSE	FALSE
Potegl	261.745	-0.834869	0.00121543	0.00690407	1.78693	TRUE	FALSE	FALSE	FALSE
4931428L18Rik	37.7925	-1.2895	0.000291519	0.00206542	2.39228	TRUE	TRUE	FALSE	FALSE
Jhy	495.384	0.563165	2.57e-05	0.000251732	9.51755	TRUE	TRUE	TRUE	FALSE
4931429L15Rik	407.09	0.412983	0.0131254	0.0476816	2.61619	FALSE	FALSE	TRUE	FALSE
4931440P22Rik	21.546	1.71988	0.00169034	0.00908699	6.59264	FALSE	FALSE	FALSE	FALSE
Dmtf1l	117.887	-1.63093	1.09e-10	3.48e-09	4.09551	TRUE	FALSE	FALSE	FALSE
4932413F04Rik	64.7787	-2.83927	6.38e-19	6e-17	5.86811	FALSE	FALSE	FALSE	FALSE
4932415M13Rik	104.31	-1.59546	2.1e-12	8.68e-11	6.08793	TRUE	FALSE	FALSE	FALSE
Stk35os1	314.59	0.695252	0.00312595	0.014996	2.64337	FALSE	FALSE	FALSE	FALSE
4932416K20Rik	54.6527	-1.10431	0.00752719	0.0305354	1.49201	FALSE	FALSE	FALSE	FALSE
4932429P05Rik	117.641	-1.36575	0.000328045	0.00226958	1.77197	TRUE	TRUE	TRUE	FALSE
4932435O22Rik	32.0179	-2.17141	6.7e-08	1.27e-06	3.2337	FALSE	FALSE	FALSE	FALSE
4932438A13Rik	4042.75	-0.664835	9.77e-05	0.000815081	2.82816	TRUE	TRUE	TRUE	FALSE
4933400A11Rik	206.448	-0.803426	0.00919141	0.0357515	1.39582	FALSE	FALSE	FALSE	FALSE
4933400C23Rik	4.62577	-2.75046	0.00296396	0.014387	4.54839	FALSE	FALSE	FALSE	FALSE
4933400F21Rik	242.374	-0.574299	0.00358906	0.0167529	2.23786	FALSE	FALSE	FALSE	FALSE
4933400L20Rik	50.5812	-1.19034	0.000467707	0.00309729	3.74642	TRUE	FALSE	FALSE	FALSE
4933401B06Rik	74.4899	-0.703361	0.0399838	0.113827	1.1735	FALSE	FALSE	FALSE	FALSE
4933401H06Rik	135.939	-3.37265	1.03e-21	1.31e-19	3.02237	FALSE	FALSE	FALSE	FALSE
4933402J07Rik	1240.15	0.51871	0.0260961	0.0817368	1.67426	FALSE	FALSE	FALSE	FALSE
4933402N22Rik	33.1853	-0.963791	0.0275817	0.0854803	1.32497	TRUE	FALSE	FALSE	FALSE
Spem2	2060.84	0.332747	0.0209012	0.0687478	2.30539	FALSE	FALSE	FALSE	FALSE
4933404G15Rik	330.41	-1.41904	1.51e-07	2.66e-06	2.42312	FALSE	FALSE	FALSE	FALSE
4933404O12Rik	771.925	-1.62056	3.81e-23	5.31e-21	14.0185	TRUE	FALSE	FALSE	FALSE
4933405O20Rik	316.691	-1.18846	0.00342764	0.0161545	1.15551	TRUE	TRUE	TRUE	FALSE
4933406D12Rik	5.53071	-2.08323	0.0138661	0.0497681	3.37711	FALSE	FALSE	FALSE	FALSE
4933406F09Rik	39.1312	-3.33665	7.57e-15	4.64e-13	2.61835	TRUE	FALSE	FALSE	FALSE
Terb2	44.3398	-0.937866	0.0162176	0.0564683	1.41302	TRUE	TRUE	TRUE	TRUE
4933406J10Rik	30.2862	-1.42132	0.00287934	0.0140623	3.20426	FALSE	FALSE	FALSE	FALSE
4933406K04Rik	155.956	-0.941674	0.00186211	0.0097856	2.13468	FALSE	FALSE	FALSE	FALSE
Mgat4f	330.936	-0.929944	1.97e-05	0.000198617	2.86649	FALSE	FALSE	FALSE	FALSE
4933407I05Rik	69.5563	-1.09807	5.81e-05	0.000515873	3.60715	TRUE	FALSE	FALSE	FALSE
4933409K07Rik	38.6502	-2.27144	9.49e-10	2.62e-08	4.57097	TRUE	FALSE	FALSE	FALSE
4933411K16Rik	5253.78	0.413301	0.00360288	0.0168037	2.6446	TRUE	TRUE	FALSE	FALSE
4933412E12Rik	85.6345	0.949628	0.00534917	0.0232447	2.4491	TRUE	FALSE	FALSE	FALSE
Tex52	63.093	0.6579	0.0309946	0.0936273	3.30648	TRUE	TRUE	FALSE	FALSE
4933416E03Rik	14.3386	-1.5492	0.00700284	0.0288182	1.58141	FALSE	FALSE	FALSE	FALSE
4933417A18Rik	479.499	-0.906523	0.00317615	0.0151947	1.3553	TRUE	FALSE	TRUE	FALSE
4933421I07Rik	86.6853	-0.792579	0.00657033	0.0273634	1.55013	TRUE	TRUE	TRUE	FALSE
4933421O10Rik	197	0.811112	3.89e-05	0.0003632	5.21812	FALSE	FALSE	FALSE	FALSE
4933424G06Rik	167.825	-0.839565	0.00190827	0.00997359	1.69213	TRUE	FALSE	TRUE	FALSE
4933425B07Rik	18.431	-1.04608	0.0488096	0.132052	1.31528	FALSE	FALSE	FALSE	FALSE
4933427E11Rik	206.147	-0.780818	0.00137934	0.00768448	2.40766	TRUE	FALSE	FALSE	FALSE
4933427E13Rik	13.4253	-1.30043	0.0186316	0.0627507	2.06255	TRUE	FALSE	FALSE	FALSE
Mfsd13b	622.601	-1.05048	1.4e-11	5.18e-10	10.2017	TRUE	FALSE	FALSE	FALSE
4933428G20Rik	72.8614	1.06192	0.000207394	0.00154812	7.27632	FALSE	FALSE	FALSE	FALSE
4933429O19Rik	72.5318	-1.81816	8.34e-13	3.64e-11	6.51484	TRUE	FALSE	FALSE	FALSE
4933430H16Rik	36.7441	-0.768533	0.0363648	0.106022	1.78192	FALSE	FALSE	FALSE	FALSE
4933433H22Rik	47.9673	-1.80507	0.00503166	0.0220852	2.9244	FALSE	FALSE	FALSE	FALSE
4933434E20Rik	332.138	-0.586644	0.000236252	0.00172611	4.69078	TRUE	TRUE	TRUE	FALSE
4933436H12Rik	55.971	-1.24117	0.00025199	0.00181926	2.64902	FALSE	FALSE	FALSE	FALSE
4933436I01Rik	169.412	-1.07254	0.00326252	0.0155144	1.35925	FALSE	FALSE	FALSE	FALSE
4933438K21Rik	23.3365	-1.83701	1.69e-05	0.000173838	4.44101	FALSE	FALSE	FALSE	FALSE
4933439C10Rik	17.9342	1.55202	0.00995576	0.0381167	3.65473	TRUE	FALSE	FALSE	FALSE
4933439K11Rik	8.59709	-1.40056	0.0354323	0.103934	2.31848	FALSE	FALSE	FALSE	FALSE
4933440M02Rik	428.9	-0.926366	6.83e-13	3e-11	24.255	FALSE	TRUE	FALSE	FALSE
5031410I06Rik	4.66795	-4.18521	0.00164372	0.00887558	1.42059	TRUE	TRUE	TRUE	FALSE
5031426D15Rik	15.8258	-3.18416	2.5e-08	5.26e-07	2.98594	FALSE	FALSE	FALSE	FALSE
5033403F01Rik	19.6995	-1.27066	0.00984983	0.0378019	2.12085	FALSE	FALSE	FALSE	FALSE
5430427M07Rik	5.56834	-3.70356	0.0031211	0.0149824	1.25492	TRUE	FALSE	FALSE	FALSE
5530401A14Rik	1.81356	-5.7658	0.00657285	0.0273634	1.61959	TRUE	TRUE	FALSE	FALSE
5730405O15Rik	2.9629	-3.51359	0.00757043	0.0306563	10.8988	TRUE	FALSE	FALSE	FALSE
5730408K05Rik	7.06981	-1.64903	0.0498469	0.134222	1.33318	FALSE	FALSE	FALSE	FALSE
5730409E04Rik	8.43812	1.89722	0.0407157	0.115407	2.52395	TRUE	TRUE	TRUE	FALSE
Mm2pr	2.45253	3.29308	0.0321353	0.0962424	22.5761	FALSE	FALSE	FALSE	FALSE
5730480H06Rik	13.99	-2.03837	0.000138854	0.00110762	4.1785	TRUE	FALSE	FALSE	FALSE
Inava	120.224	0.766756	0.0017643	0.00940976	3.32097	TRUE	FALSE	TRUE	FALSE
Trmo	67.5045	-0.977998	0.00124809	0.00705447	2.68278	FALSE	FALSE	TRUE	FALSE
5830417I10Rik	134.002	-0.788559	0.000357293	0.0024474	2.69832	TRUE	FALSE	FALSE	FALSE
5830418P13Rik	3.59621	-3.41314	0.0068556	0.0283144	1.45188	FALSE	FALSE	FALSE	FALSE
5830432E09Rik	1.8639	-3.93438	0.0387655	0.111278	1.51312	FALSE	FALSE	FALSE	FALSE
6030443J06Rik	31.3178	-0.955549	0.0108992	0.0410197	2.84041	TRUE	FALSE	FALSE	FALSE
6030498E09Rik	3.46989	-3.1577	0.0340048	0.100783	1.12397	TRUE	TRUE	TRUE	FALSE
Zswim9	20.8039	1.36647	0.0222477	0.0721852	2.23676	TRUE	FALSE	TRUE	FALSE
6330415B21Rik	3.87117	-4.37143	0.000642683	0.00405308	2.67273	FALSE	FALSE	FALSE	FALSE
6430550D23Rik	55.7774	0.966138	0.00498873	0.0219343	3.07825	TRUE	TRUE	TRUE	TRUE
6530411M01Rik	3.75997	-4.28146	0.000827105	0.00501511	3.68875	FALSE	FALSE	FALSE	FALSE
6720468P15Rik	26.7471	-1.15834	0.0105414	0.0399317	3.20339	TRUE	FALSE	FALSE	FALSE
6720489N17Rik	4.86507	-2.29692	0.0315478	0.0949784	1.28732	FALSE	TRUE	TRUE	FALSE
6820431F20Rik	40.3359	-6.36768	6.06e-25	9.46e-23	5.89424	FALSE	FALSE	FALSE	FALSE
Cstdc1	34.1452	-1.2379	0.0101227	0.0386504	1.26155	TRUE	TRUE	TRUE	FALSE
8430429K09Rik	29.4695	1.36906	0.00246473	0.0123302	4.30707	TRUE	FALSE	FALSE	FALSE
9030404E10Rik	21.0514	-6.1134	4.38e-14	2.38e-12	4.67749	FALSE	FALSE	FALSE	FALSE
Armh3	58.4985	0.700931	0.0210885	0.069224	3.53033	TRUE	FALSE	TRUE	TRUE
Cfap300	311.22	-0.74647	2.59e-05	0.000253214	4.06017	TRUE	TRUE	TRUE	FALSE
9330102E08Rik	867.146	-0.680513	0.000351368	0.00241355	2.48525	FALSE	FALSE	FALSE	FALSE
9330117O12Rik	14.7519	-6.92983	1.41e-09	3.78e-08	5.43655	FALSE	FALSE	FALSE	FALSE
9330159M07Rik	20.9972	-1.50324	0.00917388	0.0356985	3.3119	FALSE	FALSE	FALSE	FALSE
9430014N10Rik	45.0271	7.49076	4.9e-10	1.42e-08	44.736	FALSE	FALSE	FALSE	FALSE
9430021M05Rik	19.1942	-9.17751	6.36e-13	2.82e-11	4.3134	TRUE	FALSE	FALSE	FALSE
9530059O14Rik	10.3756	-4.384	1.02e-07	1.86e-06	2.8285	TRUE	FALSE	FALSE	FALSE
9530068E07Rik	296.094	0.596437	0.000829468	0.00502277	3.72042	TRUE	TRUE	TRUE	TRUE
9530077C05Rik	459.314	-0.61413	4.74e-05	0.000433042	4.10408	TRUE	TRUE	TRUE	FALSE
9530082P21Rik	389.057	0.392017	0.0255488	0.0804367	2.22839	TRUE	FALSE	FALSE	FALSE
9530091C08Rik	3.07196	-2.70651	0.0333683	0.099251	1.16083	TRUE	FALSE	FALSE	FALSE
Zfp976	27.8656	-1.20504	0.00112928	0.00649148	16.49	TRUE	TRUE	TRUE	FALSE
A230009B12Rik	18.0053	-3.45371	3.41e-10	1.02e-08	3.53927	TRUE	FALSE	FALSE	FALSE
A230028O05Rik	3.46347	-3.71103	0.00278425	0.0136417	4.01991	TRUE	FALSE	FALSE	FALSE
Washc4	122.133	-0.718251	0.00470991	0.0209609	2.07403	TRUE	TRUE	TRUE	TRUE
A330023F24Rik	28.8203	-1.5613	8.4e-05	0.00071385	2.87576	TRUE	FALSE	FALSE	FALSE
A330048O09Rik	1.75259	-5.73169	0.0071373	0.0292462	1.62864	FALSE	FALSE	FALSE	FALSE
A330076C08Rik	17.0092	-1.89344	0.000630182	0.00398387	2.3709	FALSE	FALSE	FALSE	FALSE
A430005L14Rik	153.25	-0.492847	0.00829389	0.0328998	7.6679	FALSE	TRUE	TRUE	FALSE
A430046D13Rik	74.87	0.969139	0.00107407	0.00623303	3.56186	TRUE	FALSE	FALSE	FALSE
A430090L17Rik	2.04423	-2.96858	0.0482728	0.130871	2.67933	TRUE	FALSE	FALSE	FALSE
A630010A05Rik	51.6843	-0.976039	0.0322611	0.0964921	1.53041	FALSE	FALSE	FALSE	FALSE
A630066F11Rik	118.536	-0.879584	0.000202805	0.00152117	2.38894	TRUE	FALSE	FALSE	FALSE
Pate14	10.6563	-1.75366	0.00415371	0.0188862	4.43766	TRUE	FALSE	FALSE	FALSE
A730017L22Rik	8.4598	-1.89183	0.00690857	0.0285062	2.22941	FALSE	FALSE	FALSE	FALSE
A730082K24Rik	10.4895	-8.3119	3.95e-09	9.83e-08	1.77398	TRUE	FALSE	FALSE	FALSE
Btbd8	144.23	-0.86959	3.12e-06	4e-05	8.85643	FALSE	FALSE	TRUE	FALSE
A930002C04Rik	6.99136	-2.16449	0.0220209	0.0716104	1.23304	FALSE	FALSE	FALSE	FALSE
A930005H10Rik	10.1039	3.32192	0.00328572	0.0156084	6.17491	FALSE	FALSE	FALSE	FALSE
A930007I19Rik	14.4671	-2.19587	0.000446397	0.00297886	1.97175	FALSE	FALSE	FALSE	FALSE
A930013F10Rik	11.7371	-1.99552	0.00176902	0.0094206	2.0822	FALSE	FALSE	FALSE	FALSE
A930018P22Rik	98.3747	0.619286	0.0437263	0.121877	1.63768	TRUE	TRUE	TRUE	TRUE
A930019D19Rik	5.92684	-5.00459	1.97e-05	0.000198726	2.11224	FALSE	FALSE	FALSE	FALSE
Frg2f1	11.8106	2.45935	0.00541998	0.0234964	3.63981	FALSE	FALSE	FALSE	FALSE
AA467197	560.939	-0.589125	0.0182445	0.0617545	1.35154	TRUE	TRUE	FALSE	FALSE
Aaas	194.741	0.852657	0.000234527	0.00171489	3.5146	FALSE	FALSE	FALSE	FALSE
Aadacl3	5.00644	-2.17312	0.0141641	0.0506482	1.8818	TRUE	TRUE	TRUE	FALSE
Aak1	520.058	0.56482	0.000481567	0.00316777	3.63671	TRUE	TRUE	TRUE	TRUE
Aamp	1606.08	0.839062	7.07e-12	2.73e-10	8.63439	TRUE	FALSE	TRUE	FALSE
Aard	292.816	0.539844	0.00141605	0.00785782	4.14897	TRUE	FALSE	FALSE	FALSE
Aasdhppt	251.808	-0.66318	0.00598473	0.0254372	1.68206	TRUE	TRUE	TRUE	FALSE
Abca13	11.483	-1.96719	0.000954876	0.00563812	3.74937	TRUE	TRUE	TRUE	TRUE
Abca14	907.341	-0.947991	1.78e-11	6.49e-10	6.36551	TRUE	FALSE	FALSE	FALSE
Abca15	523.867	-1.30194	2.27e-15	1.48e-13	10.3882	FALSE	FALSE	FALSE	FALSE
Abca16	924.169	-1.34064	2.75e-13	1.3e-11	4.43107	TRUE	FALSE	FALSE	FALSE
Abca17	569.423	-0.435511	0.00143579	0.00794317	3.63354	FALSE	FALSE	FALSE	FALSE
Abca2	125.991	0.590656	0.0339753	0.100728	1.73086	TRUE	TRUE	TRUE	FALSE
Abca3	64.3885	0.773218	0.0204169	0.0674686	2.18814	TRUE	TRUE	TRUE	FALSE
Abca5	481.684	-0.536167	0.00199549	0.0103878	2.42918	TRUE	TRUE	TRUE	TRUE
Abca6	63.5837	1.92657	8.58e-06	9.61e-05	2.83607	TRUE	TRUE	FALSE	TRUE
Abca8a	26.8923	-0.873242	0.0320051	0.0959447	2.06656	TRUE	TRUE	FALSE	TRUE
Abca8b	13.2346	-1.22728	0.0451851	0.125045	1.27162	TRUE	TRUE	FALSE	FALSE
Abca9	183.968	-0.555419	0.0085388	0.0336882	3.11636	TRUE	TRUE	FALSE	FALSE
Abcb5	2.83971	-4.52382	0.00213959	0.0110061	16.4213	TRUE	FALSE	FALSE	FALSE
Abcb9	169.753	0.96659	0.00117562	0.00672193	2.67136	TRUE	TRUE	FALSE	FALSE
Abcc4	26.0593	1.11955	0.0153179	0.0540123	4.02793	TRUE	TRUE	TRUE	FALSE
Abcd3	151.377	-0.596626	0.00150888	0.00825495	3.97719	TRUE	TRUE	TRUE	TRUE
Abce1	725.118	-0.789002	0.000387664	0.00263314	1.95016	TRUE	TRUE	TRUE	TRUE
Abcf1	859.841	0.809676	1.34e-05	0.000142302	4.3139	FALSE	TRUE	TRUE	FALSE
Abcg2	247.93	-0.7679	5.9e-05	0.000522703	3.57028	FALSE	TRUE	FALSE	FALSE
Abhd11	172.035	0.693183	0.00133043	0.00745751	3.43476	TRUE	TRUE	FALSE	FALSE
Abhd13	86.6203	-0.800243	0.00335842	0.0158922	1.97911	TRUE	TRUE	TRUE	TRUE
Abhd14b	40.7337	-0.74125	0.0335522	0.0996843	2.91968	TRUE	TRUE	TRUE	FALSE
Abhd16a	383.573	-0.410864	0.0182981	0.0619016	1.8506	FALSE	FALSE	FALSE	FALSE
Abhd16b	240.843	-0.509574	0.0157041	0.0550887	2.52758	FALSE	TRUE	TRUE	FALSE
Abhd17a	366.125	0.47999	0.00203237	0.0105388	4.45893	TRUE	TRUE	FALSE	FALSE
Abhd17c	75.5738	1.3258	2.7e-05	0.000263075	4.60097	TRUE	TRUE	TRUE	TRUE
Abhd2	829.253	0.522292	0.007808	0.0313816	2.10563	TRUE	TRUE	TRUE	FALSE
Abhd5	910.96	0.264747	0.0454848	0.12564	2.47166	TRUE	TRUE	TRUE	FALSE
Abhd8	564.019	0.749789	2.49e-06	3.29e-05	4.51524	TRUE	FALSE	FALSE	FALSE
Abi3	42.6386	1.39663	0.00675288	0.027963	1.69552	TRUE	TRUE	TRUE	FALSE
Abl1	820.064	0.710858	4.16e-06	5.16e-05	4.75138	TRUE	TRUE	TRUE	FALSE
Ablim2	5.64645	-1.91021	0.0471734	0.128666	0.955245	TRUE	TRUE	TRUE	FALSE
Abr	84.4338	0.772922	0.0205768	0.0679103	1.90522	TRUE	TRUE	TRUE	FALSE
Abracl	23.1605	-0.928121	0.0499638	0.134398	1.18363	FALSE	FALSE	TRUE	FALSE
Abtb2	53.4048	1.50228	3.14e-05	0.000300615	5.48494	TRUE	TRUE	TRUE	FALSE
Acaa1b	29.6783	0.957283	0.0281645	0.086888	2.4767	TRUE	TRUE	TRUE	FALSE
Acaa2	74.9157	0.652575	0.0320096	0.0959447	2.21913	FALSE	TRUE	TRUE	FALSE
Acaca	361.735	-0.760009	1.34e-05	0.000142302	5.50746	TRUE	TRUE	TRUE	FALSE
Acadl	100.474	0.772614	0.00452671	0.020284	2.82361	TRUE	TRUE	FALSE	TRUE
Acads	27.9245	1.75186	0.000783097	0.00479607	3.79731	TRUE	TRUE	TRUE	FALSE
Acadsb	169.452	-0.56124	0.00733727	0.0299179	1.97057	TRUE	TRUE	TRUE	FALSE
Acadvl	120.688	0.508242	0.0184173	0.0621895	5.24218	TRUE	TRUE	FALSE	FALSE
Acan	6.00264	2.49004	0.0425696	0.119552	2.61917	TRUE	FALSE	TRUE	FALSE
Acat2	1989.85	-7.20769	3.48e-233	7.05e-230	6.59689	TRUE	TRUE	TRUE	FALSE
Acat3	3209.58	-10.0276	1.57e-281	4.09e-278	6.70014	TRUE	FALSE	TRUE	FALSE
Acbd6	634.444	0.351558	0.00528531	0.023022	5.23048	TRUE	FALSE	TRUE	FALSE
Ace	2869.05	0.743016	5.31e-12	2.07e-10	10.0792	TRUE	TRUE	TRUE	TRUE
Ace3	438.553	0.747558	4.49e-06	5.51e-05	4.95849	FALSE	TRUE	FALSE	FALSE
Acer3	102.407	-1.03835	5.35e-05	0.000480394	2.53623	TRUE	TRUE	TRUE	TRUE
Ache	8.62853	-6.14243	3.82e-07	6.1e-06	5.11476	FALSE	FALSE	FALSE	FALSE
Acin1	1183.79	0.907875	3.7e-10	1.1e-08	6.99826	TRUE	FALSE	TRUE	FALSE
Acly	327.811	0.611109	0.000449777	0.00300032	3.91529	TRUE	TRUE	TRUE	TRUE
Acot10	175.363	-1.64033	3.27e-11	1.14e-09	3.00879	TRUE	TRUE	FALSE	FALSE
Acot7	1710.64	1.06793	3.45e-15	2.21e-13	7.21208	FALSE	FALSE	TRUE	FALSE
Acot9	244.174	-1.4969	9.95e-06	0.00010969	1.68449	FALSE	TRUE	FALSE	FALSE
Acp1	154.963	-1.74672	5.51e-13	2.47e-11	3.95457	TRUE	TRUE	TRUE	FALSE
Acp5	17.1575	1.45078	0.0295211	0.0902041	2.15658	TRUE	FALSE	TRUE	FALSE
Acr	1014.29	0.740739	3.22e-10	9.71e-09	10.9166	TRUE	TRUE	TRUE	FALSE
Acrbp	1873.56	0.81444	1.94e-06	2.65e-05	4.60104	FALSE	FALSE	FALSE	FALSE
Acsbg1	569.531	0.416842	0.0253055	0.0798643	1.90396	FALSE	FALSE	TRUE	FALSE
Acsbg2	1186.01	0.664722	8.84e-07	1.31e-05	6.13419	FALSE	TRUE	FALSE	FALSE
Acsf2	29.4701	1.73374	0.000239899	0.00174716	8.3986	TRUE	TRUE	TRUE	FALSE
Acsl6	403.752	0.84775	1.81e-05	0.00018446	3.86779	TRUE	TRUE	TRUE	FALSE
Acsm4	1.39014	-4.37174	0.0381164	0.109846	1.31212	TRUE	TRUE	FALSE	FALSE
Acta2	153.948	0.578844	0.0420188	0.118292	1.62338	TRUE	TRUE	TRUE	TRUE
Actbl2	1.87075	-4.80381	0.0134392	0.048537	1.56546	TRUE	TRUE	TRUE	TRUE
Actg1	692.293	-1.61775	2.37e-30	5.15e-28	12.1448	TRUE	FALSE	FALSE	FALSE
Actg2	1125.9	0.809072	3.34e-12	1.34e-10	11.913	FALSE	FALSE	FALSE	FALSE
Actl11	2933	0.468263	0.000152608	0.00120178	4.30737	TRUE	FALSE	FALSE	FALSE
Actl7b	1809.09	0.45739	0.00236922	0.0119415	2.84574	FALSE	FALSE	FALSE	FALSE
Actn1	51.399	1.54906	0.000133641	0.00107072	3.427	FALSE	TRUE	TRUE	FALSE
Actn3	39.1734	0.834118	0.0420961	0.118436	1.97666	FALSE	FALSE	FALSE	TRUE
Actn4	233.251	0.497944	0.00685142	0.0283036	3.12884	TRUE	TRUE	TRUE	FALSE
Actr2	226.219	-0.608139	0.000796366	0.00485615	4.01199	TRUE	TRUE	TRUE	TRUE
Actr3	84.5274	-0.744547	0.00344479	0.0162038	5.26542	TRUE	TRUE	TRUE	FALSE
Actr6	191.563	-1.17928	1.33e-05	0.000141376	2.42145	TRUE	TRUE	TRUE	FALSE
Actrt2	2289.76	-0.769041	3.56e-05	0.000335451	3.59633	FALSE	FALSE	FALSE	FALSE
Acvr2a	212.301	-0.428973	0.0398413	0.113581	1.6024	TRUE	TRUE	TRUE	FALSE
Adal	80.7047	-0.879394	0.00185922	0.00977886	2.28791	TRUE	TRUE	TRUE	FALSE
Adam10	184.952	0.540382	0.00546971	0.0236727	3.81103	TRUE	TRUE	TRUE	TRUE
Adam18	797.525	-0.58613	0.00362626	0.0168834	1.847	TRUE	FALSE	FALSE	FALSE
Adam20	250.269	-0.689401	0.0100425	0.0383926	1.35273	TRUE	TRUE	FALSE	FALSE
Adam24	876.707	-0.892969	0.000785941	0.00481026	1.56395	TRUE	TRUE	TRUE	FALSE
Adam25	191.1	-0.836745	0.00563825	0.0242582	1.40365	FALSE	FALSE	FALSE	TRUE
Adam26a	209.089	-1.4344	3.35e-06	4.26e-05	2.11364	FALSE	FALSE	FALSE	FALSE
Adam26b	86.2809	-1.16816	4.14e-05	0.000383469	3.17702	FALSE	FALSE	FALSE	FALSE
Adam29	411.397	-1.12276	0.00257617	0.0128009	1.18695	FALSE	FALSE	TRUE	FALSE
Adam30	366.23	-0.638681	2.84e-05	0.000274741	5.59643	FALSE	FALSE	TRUE	TRUE
Adam34	96.9718	-1.05678	0.000212398	0.00157965	2.04084	FALSE	FALSE	FALSE	FALSE
Adam39	171.514	-0.846232	0.00380325	0.0175701	1.71886	FALSE	FALSE	FALSE	FALSE
Adam4	285.931	-0.774888	3.07e-05	0.000295504	2.86979	FALSE	FALSE	FALSE	FALSE
Adam6a	466.934	-0.800364	1.02e-07	1.87e-06	5.30134	FALSE	FALSE	FALSE	FALSE
Adam6b	345.803	-0.944939	1.02e-08	2.34e-07	4.67022	FALSE	FALSE	FALSE	FALSE
Adamts3	11.6101	-1.59476	0.042782	0.119885	1.04231	FALSE	TRUE	TRUE	TRUE
Adamtsl3	16.7322	-1.50937	0.00337139	0.015949	2.97349	TRUE	TRUE	FALSE	FALSE
Adarb1	85.2866	0.702395	0.00539721	0.0234311	5.82335	TRUE	TRUE	TRUE	TRUE
Adat1	58.6317	-0.713553	0.0107648	0.040618	3.02434	TRUE	TRUE	TRUE	TRUE
Adat2	57.1627	0.967483	0.00703291	0.0289159	2.55424	FALSE	TRUE	TRUE	FALSE
Adat3	45.0153	0.794022	0.0434955	0.121549	1.85487	TRUE	TRUE	TRUE	FALSE
Adck2	25.0268	1.31049	0.0143695	0.0512383	2.4082	TRUE	TRUE	TRUE	FALSE
Coq8b	65.0342	1.23046	6.11e-05	0.000539243	6.64906	FALSE	FALSE	TRUE	FALSE
Adcy10	2663.57	-0.350014	0.0134569	0.0485776	2.09448	TRUE	FALSE	TRUE	FALSE
Adcy9	76.5829	0.822154	0.00401097	0.0183469	3.95179	FALSE	TRUE	TRUE	FALSE
Adgrb1	36.3282	-1.33276	9.15e-05	0.000769651	3.51155	TRUE	FALSE	TRUE	FALSE
Adgrb2	59.437	-3.62764	2.7e-24	4e-22	4.72796	TRUE	FALSE	FALSE	FALSE
Adgre1	27.505	-0.989734	0.0109837	0.041256	2.55344	TRUE	FALSE	FALSE	TRUE
Adgrg1	158.724	0.638686	0.0227495	0.0734089	1.79875	TRUE	FALSE	TRUE	TRUE
Adgrl1	465.777	0.513095	0.0268863	0.0837662	1.57944	TRUE	FALSE	TRUE	FALSE
Adgrv1	301.446	-1.0458	7.62e-09	1.79e-07	5.50054	TRUE	FALSE	FALSE	FALSE
Adh1	33.6694	1.94305	0.00206153	0.0106677	2.41551	TRUE	TRUE	TRUE	FALSE
Adh7	57.4564	-1.28409	4.82e-05	0.000438953	2.58436	TRUE	TRUE	FALSE	FALSE
Adipoq	93.8972	-1.82707	2.57e-14	1.45e-12	9.84019	FALSE	TRUE	TRUE	FALSE
Adk	114.887	-1.0146	1.94e-06	2.65e-05	7.17342	TRUE	TRUE	FALSE	FALSE
Adora1	178.768	0.579774	0.00233654	0.0118259	4.83227	TRUE	TRUE	TRUE	FALSE
Adprh	118.135	1.12891	0.000167632	0.00129913	3.18434	TRUE	TRUE	FALSE	FALSE
Adra1d	54.5169	-1.18132	0.000471392	0.00311829	2.26663	FALSE	TRUE	TRUE	FALSE
Grk2	53.4709	1.41268	0.000177101	0.00135639	3.99189	TRUE	FALSE	TRUE	FALSE
Adsl	97.014	1.13713	4.56e-06	5.58e-05	16.8592	TRUE	TRUE	TRUE	FALSE
Adtrp	144.465	-1.35724	4.56e-06	5.58e-05	2.2541	TRUE	TRUE	TRUE	FALSE
Tle5	190.296	0.924198	1.44e-05	0.000151689	4.61055	FALSE	FALSE	TRUE	FALSE
Semp2l2a	633.898	-1.78232	5.03e-19	4.86e-17	5.04773	FALSE	FALSE	FALSE	FALSE
Aff1	64.9279	1.07679	0.000521286	0.00339179	5.04627	TRUE	TRUE	TRUE	TRUE
Aff4	1029.21	-0.346063	0.00516188	0.0225597	4.18039	TRUE	TRUE	TRUE	TRUE
Afg3l1	256.689	1.73788	1.31e-14	7.74e-13	7.02991	TRUE	TRUE	TRUE	FALSE
Afg3l2	240.918	0.642443	0.00201971	0.010487	2.99083	TRUE	TRUE	TRUE	FALSE
Afm	13.2969	-8.6511	6.38e-11	2.13e-09	3.24275	TRUE	TRUE	TRUE	FALSE
Agap3	85.6958	0.898582	0.000421749	0.00283303	11.1876	TRUE	TRUE	TRUE	FALSE
Agbl1	18.1461	-0.908515	0.0499597	0.134398	2.94177	TRUE	FALSE	FALSE	FALSE
Agbl3	718.061	-0.74676	7.63e-08	1.43e-06	4.61974	TRUE	TRUE	TRUE	TRUE
Agbl4	355.662	-0.320939	0.0346266	0.102244	2.85788	TRUE	FALSE	TRUE	FALSE
Agbl5	3690.29	0.664072	7.53e-06	8.58e-05	4.98985	TRUE	FALSE	TRUE	FALSE
Agk	32.2388	-0.840892	0.0470639	0.128496	2.59246	TRUE	TRUE	TRUE	FALSE
Ago1	52.6882	0.884134	0.046513	0.127645	1.70414	FALSE	TRUE	TRUE	TRUE
Ago3	110.612	-1.04549	0.00208314	0.0107582	1.60139	TRUE	TRUE	TRUE	FALSE
Agpat1	1622.6	0.638351	9.2e-06	0.000102016	4.90552	TRUE	FALSE	TRUE	FALSE
Agpat3	1707.02	0.363748	0.00223995	0.0114309	3.7256	TRUE	TRUE	TRUE	FALSE
Gpat3	173.965	-0.576294	0.00156664	0.0085123	3.45788	TRUE	FALSE	TRUE	FALSE
Agps	100.87	-0.580852	0.0124814	0.0456692	2.64355	TRUE	TRUE	TRUE	TRUE
Agr3	13.2175	-2.77354	0.00610742	0.0258563	1.94733	TRUE	TRUE	FALSE	TRUE
Agrn	44.2011	1.27937	0.00664435	0.0275981	2.09462	TRUE	TRUE	TRUE	TRUE
Agt	451.447	-1.12365	0.00531123	0.0231184	1.76412	FALSE	TRUE	FALSE	FALSE
Agtpbp1	1582.83	0.294043	0.038985	0.111733	1.94313	TRUE	TRUE	TRUE	FALSE
Agtr1a	91.4432	0.750052	0.0153349	0.0540513	2.12135	FALSE	FALSE	TRUE	FALSE
Agtr1b	11.0457	-1.66953	0.00877691	0.0344849	1.69614	TRUE	FALSE	TRUE	FALSE
Ahctf1	3340.16	-0.651877	1.02e-08	2.34e-07	6.13289	TRUE	TRUE	TRUE	TRUE
Ahcy	29.3902	-1.23736	0.00201542	0.0104736	2.34109	TRUE	TRUE	TRUE	FALSE
Ahcyl2	601.549	0.495921	0.00365609	0.0170006	2.7807	TRUE	TRUE	TRUE	TRUE
Ahdc1	643.176	1.12971	3.16e-05	0.000302342	2.21649	TRUE	TRUE	TRUE	FALSE
Ahsa1	129.523	1.04074	0.000192172	0.00145472	3.23058	TRUE	TRUE	FALSE	FALSE
Igsf9b	32.2624	-1.01672	0.0390803	0.111909	1.00758	TRUE	FALSE	TRUE	FALSE
Mexis	4.526	-2.02522	0.0280643	0.0866084	2.38604	TRUE	FALSE	FALSE	FALSE
AI429214	384.156	-0.686801	0.00389382	0.0178865	2.24887	TRUE	TRUE	TRUE	FALSE
AI506816	9.12182	5.18824	0.000804007	0.00489457	1.48287	TRUE	FALSE	FALSE	FALSE
AI507597	714.535	0.478351	0.0207639	0.0684169	1.74827	TRUE	FALSE	FALSE	FALSE
AI597479	221.03	-0.853497	6.19e-06	7.27e-05	3.13126	TRUE	TRUE	TRUE	FALSE
AI837181	126.88	1.05013	2.89e-06	3.75e-05	8.88264	TRUE	FALSE	TRUE	FALSE
Spindoc	218.632	0.873398	0.000560882	0.00361336	2.64553	TRUE	TRUE	TRUE	FALSE
AI987944	412.327	-0.627454	0.0258283	0.0810928	1.37368	TRUE	TRUE	TRUE	FALSE
Aifm3	12.121	1.79104	0.0138121	0.0496426	7.08298	TRUE	TRUE	FALSE	TRUE
Aimp2	61.6292	1.02119	0.00195875	0.0102111	3.19014	FALSE	TRUE	FALSE	FALSE
Aip	42.7834	1.34243	0.00119867	0.00682376	3.25407	TRUE	TRUE	TRUE	TRUE
Ak2	404.299	0.578474	0.00223274	0.0114017	2.94047	TRUE	TRUE	TRUE	TRUE
Ak4	35.7313	-0.889426	0.0110652	0.0414728	2.35543	TRUE	TRUE	TRUE	FALSE
Ak7	543.69	0.485295	0.0039431	0.0180682	2.76778	TRUE	TRUE	TRUE	FALSE
Ak8	1106.68	0.49212	4e-05	0.000371947	6.31733	FALSE	FALSE	FALSE	FALSE
Akap1	3587.89	0.517016	0.000600385	0.00382234	3.55182	TRUE	TRUE	TRUE	TRUE
Akap11	541.587	-0.415755	0.0177527	0.0605383	1.81265	TRUE	TRUE	TRUE	TRUE
Akap12	19350.8	0.764005	1.14e-16	8.85e-15	12.084	TRUE	FALSE	FALSE	FALSE
Akap17b	86.6345	-1.0719	3.32e-06	4.23e-05	5.72904	TRUE	TRUE	TRUE	FALSE
Akap8l	262.159	0.663444	0.000129094	0.0010393	5.74292	TRUE	FALSE	FALSE	FALSE
Akap9	661.828	-0.651421	0.000453828	0.00302182	2.7396	TRUE	TRUE	TRUE	FALSE
Akirin2	585.938	0.798307	2.78e-05	0.0002698	4.01699	TRUE	TRUE	TRUE	FALSE
Akna	474.575	0.963973	6.54e-09	1.56e-07	6.20978	TRUE	TRUE	FALSE	TRUE
Akr1b7	22.0809	-1.4273	0.0106246	0.0401802	2.48351	TRUE	TRUE	FALSE	FALSE
Akr1c12	8.69009	-2.34237	0.00096383	0.00567264	4.58143	FALSE	TRUE	FALSE	FALSE
Akr1c13	14.9968	-1.47503	0.00645192	0.0270078	2.70783	FALSE	FALSE	FALSE	FALSE
Akr1c19	7.22766	-2.08434	0.00366384	0.0170236	4.83722	TRUE	TRUE	TRUE	TRUE
Akr1c21	2.72886	3.44502	0.0221995	0.0720673	11.6681	TRUE	TRUE	TRUE	FALSE
Akr1e1	168.184	-0.617413	0.0211723	0.0694369	1.36022	TRUE	TRUE	TRUE	FALSE
Akt1	151.622	0.610759	0.0120084	0.0442871	2.32883	TRUE	TRUE	TRUE	FALSE
Akt1s1	149.396	-0.613395	0.016673	0.0576871	1.47789	TRUE	TRUE	TRUE	FALSE
Aktip	203.391	0.551389	0.0236524	0.075667	1.9236	TRUE	FALSE	TRUE	TRUE
Alas1	581.15	0.751378	0.000648079	0.00408147	3.26315	TRUE	TRUE	TRUE	TRUE
Aldh18a1	30.1663	1.01662	0.01954	0.0652442	3.19691	TRUE	TRUE	TRUE	FALSE
Aldh1a1	1301.68	1.13349	0.000139742	0.00111422	2.37922	TRUE	TRUE	TRUE	TRUE
Aldh2	298.963	1.79225	8.2e-14	4.23e-12	5.36364	TRUE	TRUE	TRUE	FALSE
Aldh3b1	182.019	0.724348	0.00111235	0.00642247	3.27233	TRUE	FALSE	TRUE	FALSE
Aldh3b2	103.32	0.53965	0.0263374	0.0823936	3.19573	TRUE	TRUE	TRUE	TRUE
Aldh4a1	33.363	0.894134	0.0443629	0.123162	1.90426	TRUE	TRUE	TRUE	FALSE
Aldh4a1	71.6284	-0.553427	0.0360344	0.105209	2.22439	TRUE	TRUE	TRUE	FALSE
Aldh6a1	273.602	-0.901684	1.64e-08	3.61e-07	6.5048	TRUE	TRUE	TRUE	TRUE
Aldh7a1	162.783	0.860415	0.000696209	0.00434251	3.03297	TRUE	TRUE	TRUE	FALSE
Aldh9a1	303.686	0.62849	5.03e-05	0.000455283	9.43719	TRUE	TRUE	TRUE	FALSE
Alg13	291.363	-0.32971	0.0353307	0.103736	2.64384	TRUE	TRUE	TRUE	FALSE
Pdcd6	72.3382	0.876183	0.00700763	0.0288315	2.53512	TRUE	FALSE	TRUE	FALSE
Alg6	24.8762	-1.55077	0.000297485	0.00210116	2.23148	TRUE	TRUE	TRUE	FALSE
Alkbh3	240.729	-0.408685	0.0433842	0.121294	1.56215	TRUE	TRUE	TRUE	FALSE
Alkbh5	391.182	0.738543	0.000412178	0.00277487	2.90169	TRUE	TRUE	TRUE	TRUE
Alms1	2083.93	-0.894505	1.19e-10	3.76e-09	5.16037	TRUE	TRUE	FALSE	FALSE
Alox12	33.2501	-0.728207	0.0420314	0.118309	2.51895	TRUE	TRUE	TRUE	TRUE
Alox5ap	2.50933	3.32297	0.0341869	0.101142	4.04588	FALSE	TRUE	TRUE	FALSE
Alpk1	49.7215	-0.772846	0.0094461	0.0365074	3.64476	TRUE	TRUE	TRUE	FALSE
Als2	214.478	0.481865	0.00866477	0.0341262	3.7418	TRUE	TRUE	TRUE	TRUE
Flacc1	708.172	-0.906807	0.000165517	0.00128438	1.97981	TRUE	FALSE	FALSE	FALSE
Ambra1	349.009	0.600531	0.0138272	0.049673	1.90692	TRUE	TRUE	TRUE	FALSE
Amer2	306.148	0.775002	2.09e-05	0.000209819	4.6192	TRUE	TRUE	TRUE	FALSE
Amigo1	19.8775	-1.46288	0.000799612	0.00487107	5.06137	TRUE	TRUE	TRUE	TRUE
Ammecr1l	1036.14	0.525892	0.000251848	0.00181926	4.12217	TRUE	TRUE	TRUE	TRUE
Amn1	447.776	-0.937299	0.000313983	0.00219223	1.82682	FALSE	FALSE	TRUE	FALSE
Amotl1	493.565	0.576625	0.00015064	0.00118813	4.51189	TRUE	TRUE	TRUE	TRUE
Amotl2	37.0557	0.940061	0.0129012	0.0469791	5.33244	TRUE	TRUE	TRUE	FALSE
Ampd2	31.0405	1.13899	0.0470131	0.128448	1.5643	TRUE	TRUE	TRUE	FALSE
Amy2a5	3.76863	-6.80416	3.89e-05	0.000363378	1.69058	FALSE	FALSE	FALSE	FALSE
Anapc10	166.516	-1.12207	2.08e-05	0.000209326	2.39767	TRUE	TRUE	TRUE	TRUE
Anapc11	130.145	0.618859	0.00890294	0.0348661	2.62161	TRUE	TRUE	TRUE	TRUE
Anapc15	79.1032	-0.932979	0.00237669	0.0119693	2.02432	TRUE	TRUE	TRUE	FALSE
Anapc2	179.328	0.602156	0.00225975	0.0115107	4.42222	TRUE	FALSE	FALSE	FALSE
Anapc5	340.574	0.339644	0.035328	0.103736	2.73472	TRUE	FALSE	TRUE	FALSE
Angel1	1370.73	0.40017	0.0374403	0.108395	1.84824	TRUE	TRUE	TRUE	TRUE
Angel2	275.666	-0.374524	0.0372655	0.107975	2.0428	TRUE	TRUE	FALSE	FALSE
Angptl1	10.72	-2.54162	4.17e-05	0.000385917	4.77946	FALSE	FALSE	FALSE	FALSE
Angptl2	18.249	-1.49755	0.00452044	0.0202609	1.5106	TRUE	TRUE	TRUE	TRUE
Ankar	1090.76	-0.71688	0.000631116	0.00398721	2.53953	FALSE	FALSE	FALSE	FALSE
Ankfy1	201.881	-0.52345	0.00764178	0.0308426	2.58035	TRUE	TRUE	TRUE	TRUE
Ankhd1	824.787	-0.35422	0.0129521	0.0471365	3.13592	TRUE	TRUE	FALSE	TRUE
Ankra2	168.941	-0.404937	0.0394705	0.11276	2.03442	TRUE	TRUE	TRUE	TRUE
Ankrd11	577.952	0.805335	1.29e-06	1.83e-05	4.40179	TRUE	TRUE	TRUE	FALSE
Ankrd13c	181.889	0.547478	0.0268583	0.0836933	1.82055	TRUE	TRUE	TRUE	FALSE
Ankrd22	3.83049	-3.28726	0.00650971	0.027206	1.37237	TRUE	TRUE	TRUE	FALSE
Ankrd23	36.4858	-0.743135	0.0445888	0.123676	2.07835	TRUE	TRUE	TRUE	FALSE
Slf1	361.642	-0.891447	0.00149883	0.00820982	2.40398	TRUE	FALSE	FALSE	FALSE
Ankrd33b	57.5818	-1.92146	6.6e-09	1.58e-07	3.26284	TRUE	TRUE	TRUE	FALSE
Ankrd34a	2.868	-3.47524	0.0099908	0.0382188	1.4793	TRUE	TRUE	TRUE	FALSE
Ankrd40	275.177	1.39052	2.59e-14	1.46e-12	11.8895	TRUE	TRUE	TRUE	FALSE
Ankrd42	1517.75	0.421229	0.00206627	0.0106862	3.04907	TRUE	TRUE	TRUE	FALSE
Ankrd44	98.0452	-1.34006	4.76e-08	9.38e-07	5.40427	TRUE	TRUE	TRUE	TRUE
Ankrd45	530.755	-0.570901	0.00413746	0.0188228	1.78584	TRUE	TRUE	TRUE	FALSE
Ankrd52	114.611	0.630015	0.0466988	0.127929	1.44516	TRUE	TRUE	TRUE	FALSE
Ankrd53	319.411	-0.328917	0.0480916	0.130516	1.8734	FALSE	FALSE	FALSE	FALSE
Ankrd55	141.78	-1.66325	2.9e-13	1.37e-11	5.72619	TRUE	FALSE	TRUE	TRUE
Ankrd61	916.426	0.443328	6.15e-05	0.000542656	14.9521	TRUE	TRUE	TRUE	FALSE
Ankrd7	696.972	-0.925061	0.000926247	0.00548185	1.61305	TRUE	FALSE	FALSE	FALSE
Anks1	130.992	0.500466	0.0465072	0.127645	1.94728	TRUE	TRUE	TRUE	TRUE
Anks1b	57.8948	-1.05808	0.000196066	0.00147868	4.86165	TRUE	TRUE	TRUE	FALSE
Anks6	79.4552	-2.90964	8.99e-23	1.23e-20	5.43281	TRUE	TRUE	TRUE	FALSE
Ano1	153.347	0.541393	0.0447193	0.123979	1.59839	TRUE	TRUE	TRUE	FALSE
Ano3	6.73555	-1.49416	0.0470568	0.128496	2.2694	FALSE	TRUE	TRUE	TRUE
Ano5	96.7629	-0.836197	0.000251134	0.00181738	4.49837	TRUE	TRUE	TRUE	FALSE
Ano6	120.687	0.532595	0.0308266	0.0933039	2.09135	TRUE	TRUE	TRUE	FALSE
Anp32b	195.401	1.30124	3.65e-07	5.88e-06	3.93656	TRUE	FALSE	FALSE	FALSE
Antxr2	99.7355	-2.24577	4.24e-19	4.12e-17	4.80941	TRUE	TRUE	TRUE	TRUE
Antxrl	701.857	0.527621	0.000142645	0.00113439	4.69467	FALSE	FALSE	FALSE	FALSE
Anxa11	135.499	-0.768154	0.000818709	0.00497577	2.46076	TRUE	TRUE	TRUE	FALSE
Anxa3	102.032	-0.832665	0.0307512	0.0931057	1.06495	TRUE	TRUE	TRUE	FALSE
Aoc3	21.6425	1.27789	0.0306892	0.0929485	1.88692	TRUE	TRUE	TRUE	TRUE
Ap1ar	71.2619	1.14336	0.000204784	0.00153177	4.61967	TRUE	TRUE	TRUE	TRUE
Ap1s2	139.21	-1.68759	3.67e-14	2.02e-12	4.44421	TRUE	TRUE	TRUE	TRUE
Ap2a1	1623.38	0.827209	6.89e-07	1.04e-05	4.36797	FALSE	FALSE	FALSE	FALSE
Ap3b1	1041.67	0.417877	0.00330874	0.0157015	3.26984	TRUE	TRUE	TRUE	FALSE
Ap3d1	1315.53	0.747083	1.11e-06	1.59e-05	5.39286	TRUE	FALSE	TRUE	FALSE
Ap3m1	135.536	-1.19723	9.28e-08	1.72e-06	4.70562	TRUE	TRUE	TRUE	TRUE
Ap5m1	64.6927	-0.979674	0.000118045	0.000962433	8.33505	TRUE	TRUE	TRUE	TRUE
Ap5z1	36.4895	0.886607	0.0272999	0.0847655	2.4547	TRUE	TRUE	TRUE	TRUE
Apba1	937.41	1.11638	8.38e-09	1.96e-07	5.13238	TRUE	TRUE	TRUE	FALSE
Apba3	106.854	0.639343	0.00891689	0.0348933	3.28694	FALSE	FALSE	FALSE	FALSE
Apbb1ip	46.9664	0.964817	0.00593914	0.0252611	3.40732	TRUE	TRUE	TRUE	FALSE
Aph1a	28.0328	-1.95738	1.16e-05	0.000124957	2.49771	TRUE	TRUE	TRUE	TRUE
Aph1c	32.8675	-1.35587	0.000282146	0.00200862	2.50388	TRUE	TRUE	TRUE	TRUE
Apln	38.1802	1.15833	0.00479838	0.0212716	3.0072	TRUE	TRUE	TRUE	TRUE
Aplp2	1012	0.580337	4.99e-06	6.04e-05	6.30973	TRUE	TRUE	TRUE	TRUE
Apoa2	2.99215	3.57985	0.0162667	0.0565709	6.60818	FALSE	TRUE	FALSE	FALSE
Apob	13.9015	-2.57564	2.71e-06	3.54e-05	3.88087	TRUE	FALSE	FALSE	FALSE
Apoe	264.457	1.61772	3.77e-18	3.42e-16	14.3711	FALSE	TRUE	TRUE	FALSE
Apoh	175.081	0.448608	0.0357404	0.104602	2.26649	FALSE	FALSE	FALSE	FALSE
Apol7c	9.72121	-1.68441	0.0219096	0.0713165	1.5986	TRUE	TRUE	TRUE	FALSE
Apol7e	2.45511	-2.92816	0.0485165	0.131337	1.35719	FALSE	TRUE	FALSE	TRUE
Apoo	9.49332	-1.45142	0.0466944	0.127929	1.55499	TRUE	TRUE	TRUE	TRUE
Coa8	147.617	1.09437	2.1e-06	2.85e-05	5.59262	TRUE	FALSE	TRUE	FALSE
App	353.697	1.2089	4.57e-12	1.79e-10	7.9797	TRUE	TRUE	TRUE	FALSE
Appl1	291.961	-0.852983	3.34e-05	0.000318273	2.70694	TRUE	TRUE	TRUE	TRUE
Aprt	344.75	0.4459	0.0115445	0.0428684	2.53864	TRUE	TRUE	TRUE	FALSE
Aqp11	3004.58	-0.811506	8.77e-05	0.000741515	2.16093	FALSE	TRUE	TRUE	FALSE
Aqp12	2.03095	-3.34534	0.0296836	0.0905794	2.4984	FALSE	FALSE	FALSE	FALSE
Aqp2	75.4344	-1.72972	9.3e-05	0.000779104	3.84394	FALSE	TRUE	FALSE	FALSE
Aqp5	152.324	-5.32369	1.28e-53	5.32e-51	5.21082	TRUE	TRUE	TRUE	FALSE
Ar	120.309	-0.726206	0.00479223	0.0212598	2.85559	TRUE	TRUE	TRUE	FALSE
Arap2	214.771	-0.90339	8.87e-06	9.89e-05	4.69287	TRUE	TRUE	FALSE	FALSE
Arap3	6.00757	2.4898	0.0381161	0.109846	3.54259	TRUE	FALSE	TRUE	FALSE
Arc	1106.88	0.940937	1.07e-16	8.38e-15	17.142	TRUE	TRUE	TRUE	TRUE
Arcn1	506.436	-1.07612	3.49e-09	8.75e-08	3.58101	TRUE	TRUE	TRUE	TRUE
Arf3	355.405	0.604083	0.000699846	0.00435934	3.58229	TRUE	TRUE	TRUE	TRUE
Arf6	182.55	0.644743	0.0023585	0.0118998	3.22179	TRUE	TRUE	TRUE	FALSE
Arfgef2	686.367	0.616613	4.04e-05	0.000375183	4.82946	TRUE	TRUE	TRUE	FALSE
Arfgef3	68.4665	1.36617	0.0040707	0.018569	1.92585	TRUE	TRUE	TRUE	FALSE
Arfip1	86.017	-0.756777	0.00268084	0.0132417	4.70242	TRUE	TRUE	TRUE	FALSE
Arfrp1	97.4614	0.75346	0.00147025	0.00808725	9.9949	TRUE	TRUE	TRUE	FALSE
Arhgap20	607.403	-1.07133	2.08e-13	1.01e-11	5.97547	TRUE	TRUE	TRUE	TRUE
Arhgap21	195.563	-1.81928	1.12e-17	9.98e-16	4.5044	TRUE	TRUE	TRUE	FALSE
Arhgap23	254.964	0.921429	4.97e-05	0.000451144	3.40957	TRUE	TRUE	TRUE	FALSE
Arhgap31	128.691	1.08454	9.04e-05	0.000760474	3.11408	TRUE	TRUE	TRUE	FALSE
Arhgap32	253.179	0.549274	0.00449992	0.0201888	3.06298	FALSE	TRUE	TRUE	FALSE
Arhgap33	471.752	0.889458	0.000160258	0.00125101	2.59177	FALSE	FALSE	FALSE	FALSE
Arhgap35	874.698	0.559523	4.35e-06	5.36e-05	7.56592	TRUE	TRUE	TRUE	FALSE
Arhgap39	233.92	0.494164	0.0107184	0.0404678	2.61659	TRUE	TRUE	FALSE	FALSE
Arhgap44	96.6366	0.776849	0.00293771	0.0142786	3.70673	TRUE	TRUE	TRUE	FALSE
Arhgap5	1731.4	-0.904021	0.000192721	0.00145743	1.86089	TRUE	TRUE	TRUE	FALSE
Arhgdia	270.375	0.674515	0.00063731	0.00402336	3.32379	TRUE	TRUE	TRUE	FALSE
Arhgdig	23.691	-2.03549	1.13e-05	0.000122279	10.9597	FALSE	FALSE	TRUE	FALSE
Arhgef1	63.3783	1.21382	0.000467157	0.00309476	3.44483	TRUE	FALSE	TRUE	FALSE
Arhgef10	216.389	0.72655	0.000150583	0.00118813	4.75263	TRUE	TRUE	TRUE	TRUE
Arhgef12	318.563	0.428727	0.0279281	0.0863048	2.01506	TRUE	TRUE	TRUE	TRUE
Arhgef17	43.9238	1.7523	0.00277928	0.0136247	2.62276	TRUE	TRUE	TRUE	FALSE
Arhgef2	1411.04	0.840291	4.88e-11	1.65e-09	7.3133	TRUE	TRUE	TRUE	FALSE
Arhgef25	60.7812	1.07325	0.000525462	0.00341167	6.12661	FALSE	FALSE	TRUE	FALSE
Arhgef28	18.8921	1.65227	0.00708845	0.029118	3.10099	TRUE	TRUE	TRUE	TRUE
Arhgef3	150.867	-0.46542	0.0187113	0.0629567	3.89532	TRUE	TRUE	TRUE	FALSE
Arhgef33	109.338	0.725164	0.0230759	0.0742783	1.87409	FALSE	FALSE	FALSE	FALSE
Arhgef39	49.5053	-1.12742	0.000965292	0.00567758	2.23823	TRUE	TRUE	TRUE	FALSE
Arhgef7	333.695	0.366579	0.0329274	0.0981475	2.28557	TRUE	TRUE	TRUE	FALSE
Arid1a	670.772	0.911113	5.27e-07	8.18e-06	3.60498	TRUE	TRUE	TRUE	TRUE
Arid1b	146.368	1.02404	0.00135012	0.00754935	3.00278	TRUE	TRUE	TRUE	TRUE
Arid5b	145.775	0.737129	0.00148246	0.00813483	3.56853	TRUE	TRUE	TRUE	FALSE
Arih1	1618.66	0.334998	0.029069	0.0889867	2.05817	TRUE	TRUE	TRUE	TRUE
Arl13a	142.126	-1.19074	0.000452139	0.00301167	1.66042	TRUE	FALSE	TRUE	FALSE
Arl14ep	202.955	-0.544806	0.00534871	0.0232447	2.16837	TRUE	TRUE	TRUE	FALSE
Arl14epl	113.315	0.707275	0.00167879	0.00903555	7.88985	TRUE	TRUE	TRUE	FALSE
Arl2	50.6747	0.937677	0.00891385	0.0348888	2.71326	FALSE	FALSE	TRUE	FALSE
Arl3	386.644	0.77372	0.000203034	0.00152117	2.72823	FALSE	TRUE	TRUE	FALSE
Arl4a	1995.6	-0.593596	0.0094474	0.0365074	1.61819	TRUE	TRUE	TRUE	FALSE
Arl4c	41.3138	0.958153	0.00997071	0.038158	3.9445	TRUE	TRUE	TRUE	FALSE
Arl6ip1	972.429	-0.702706	5.96e-06	7.05e-05	4.15188	TRUE	TRUE	TRUE	TRUE
Arl6ip5	24.8256	1.83015	0.000838762	0.00506225	4.02998	TRUE	TRUE	TRUE	FALSE
Arl8b	884.794	-0.500413	0.0136859	0.0492665	1.73834	TRUE	TRUE	TRUE	TRUE
Armc1	82.5632	-0.867441	0.000343176	0.00236262	5.94815	TRUE	TRUE	TRUE	TRUE
Armc5	57.0015	1.18985	0.00447618	0.0200971	2.61396	TRUE	TRUE	TRUE	FALSE
Arpc2	638.433	0.446395	0.00906401	0.0353402	2.35309	TRUE	FALSE	TRUE	FALSE
Arpc3	61.193	1.17482	0.000883184	0.00527972	3.22582	TRUE	TRUE	TRUE	FALSE
Arpc5l	318.903	0.709727	0.000346117	0.00237928	3.11854	FALSE	FALSE	TRUE	FALSE
Arrb2	16.2661	2.05881	0.00379787	0.0175525	3.27674	FALSE	FALSE	FALSE	FALSE
Arrdc3	577.632	-0.312341	0.0450714	0.124769	1.76246	TRUE	TRUE	TRUE	TRUE
Arrdc5	461.785	0.475008	0.00465674	0.0207749	2.91629	FALSE	FALSE	FALSE	FALSE
Arsa	1042.12	0.677909	2.7e-06	3.53e-05	5.25303	TRUE	TRUE	TRUE	FALSE
Arsb	82.6989	-0.482309	0.0443104	0.12307	2.48912	TRUE	TRUE	TRUE	FALSE
Arsk	67.684	-1.73903	2.85e-08	5.91e-07	3.85289	TRUE	TRUE	TRUE	TRUE
Arx	22.5337	-1.36118	0.00124467	0.00704166	5.00707	TRUE	TRUE	TRUE	FALSE
Arxes1	2.91536	-3.45268	0.0190866	0.0640348	1.24191	FALSE	TRUE	TRUE	FALSE
As3mt	71.4394	0.923639	0.00555224	0.0239334	2.40868	TRUE	TRUE	TRUE	FALSE
Asah1	165.61	-0.576025	0.00504482	0.0221276	2.25834	TRUE	TRUE	FALSE	TRUE
Asap1	1385.31	1.05449	9.44e-21	1.07e-18	14.3165	TRUE	TRUE	TRUE	FALSE
Asb1	662.427	-0.938184	2.55e-06	3.36e-05	2.89581	TRUE	TRUE	TRUE	FALSE
Asb14	27.9638	-1.10967	0.0057472	0.0246457	2.28285	FALSE	TRUE	FALSE	FALSE
Asb15	157.827	-0.863378	0.0233495	0.0749081	1.07937	FALSE	TRUE	TRUE	FALSE
Asb17	1049.52	-0.487953	0.0179018	0.0608768	1.63567	FALSE	TRUE	FALSE	FALSE
Asb2	33.6259	-1.7394	1.2e-05	0.000129144	3.37136	TRUE	TRUE	TRUE	FALSE
Asb3	116.188	-0.763108	0.0275977	0.0855153	1.10487	TRUE	TRUE	TRUE	FALSE
Asb4	312.971	-0.848504	0.00100076	0.00586305	2.05407	TRUE	TRUE	TRUE	FALSE
Ascc2	587.269	0.733453	7.93e-06	8.98e-05	4.95157	TRUE	TRUE	TRUE	FALSE
Ascc3	862.868	-0.860869	1.93e-05	0.00019493	2.44828	TRUE	TRUE	TRUE	FALSE
Ash1l	678.252	-0.433468	0.000898175	0.0053553	5.75437	TRUE	TRUE	TRUE	TRUE
Ash2l	843.109	0.420566	0.000900245	0.00536409	4.79269	TRUE	TRUE	TRUE	FALSE
Asic1	7.14675	2.04288	0.0496401	0.133862	2.32673	TRUE	TRUE	TRUE	FALSE
Asmt	3.53925	-3.42811	0.00338249	0.0159932	1.79353	FALSE	FALSE	FALSE	FALSE
Get3	243.399	0.682624	0.00074398	0.00459195	3.24612	FALSE	FALSE	FALSE	FALSE
Asnsd1	1754.34	-0.679833	0.000571354	0.00366944	2.14149	TRUE	FALSE	FALSE	FALSE
Aspdh	10.6788	-1.73979	0.0470377	0.128496	2.21411	FALSE	FALSE	FALSE	FALSE
Aspg	9.59764	-1.31437	0.0447784	0.124108	1.56342	TRUE	TRUE	TRUE	FALSE
Aspm	281.219	-0.732048	0.000178719	0.00136706	2.68915	TRUE	FALSE	FALSE	FALSE
Aspn	40.1978	-1.99686	9.08e-06	0.000100756	1.72465	TRUE	TRUE	TRUE	FALSE
Aspscr1	719.492	0.786059	8.5e-08	1.58e-06	5.90407	TRUE	TRUE	FALSE	FALSE
Asxl1	961.371	0.700615	5.6e-10	1.62e-08	17.3879	TRUE	TRUE	TRUE	FALSE
Asxl2	443.518	-0.339805	0.0143894	0.0512732	3.09411	TRUE	TRUE	TRUE	TRUE
Atad1	867.203	-0.770241	0.00118644	0.00676044	1.75603	TRUE	TRUE	TRUE	TRUE
Atf1	254.937	0.38974	0.0215685	0.070445	3.96375	TRUE	TRUE	TRUE	TRUE
Atf6b	114.079	1.51501	2.11e-07	3.61e-06	5.03819	TRUE	TRUE	TRUE	FALSE
Atf7ip	479.981	0.651287	0.000277596	0.00198216	3.24306	TRUE	TRUE	FALSE	FALSE
Atf7ip2	242.127	-1.4839	2.63e-10	8e-09	9.1206	TRUE	TRUE	TRUE	TRUE
Atg10	8.93911	-1.31674	0.0432201	0.120927	4.03137	TRUE	TRUE	TRUE	FALSE
Atg12	389.891	-0.749922	5.93e-08	1.14e-06	14.0405	TRUE	TRUE	TRUE	FALSE
Atg13	269.167	0.371581	0.0408445	0.1157	2.14946	TRUE	TRUE	TRUE	FALSE
Atg14	45.2852	0.737724	0.0462641	0.127164	2.00802	FALSE	TRUE	TRUE	FALSE
Atg2a	506.619	1.21607	2.37e-09	6.09e-08	4.31214	TRUE	TRUE	TRUE	FALSE
Atg4a	4.68966	-2.65048	0.00756693	0.0306528	3.74998	TRUE	TRUE	TRUE	TRUE
Atg4c	151.328	-0.765442	0.000649949	0.0040876	3.03697	TRUE	TRUE	TRUE	TRUE
Atg5	39.7513	-1.1064	0.00762073	0.0307917	1.49755	TRUE	TRUE	TRUE	FALSE
Atg7	280.791	0.545719	0.00209316	0.0107885	3.89405	TRUE	TRUE	TRUE	FALSE
Atg9a	1924.91	0.429456	0.00507375	0.0222358	2.86638	TRUE	TRUE	TRUE	TRUE
Atl2	345.07	-0.583352	9.86e-05	0.000820951	4.04417	TRUE	TRUE	TRUE	TRUE
Atl3	2358.48	-0.284484	0.0251248	0.0794031	2.45992	TRUE	TRUE	TRUE	TRUE
Atm	238.01	-0.655629	0.000174526	0.00134173	4.48162	TRUE	TRUE	TRUE	TRUE
Atn1	91.6812	0.691183	0.00972227	0.0373875	2.99564	TRUE	TRUE	FALSE	FALSE
Atoh8	558.364	0.552179	0.00395533	0.0181197	2.56669	TRUE	TRUE	TRUE	TRUE
Atp10d	97.7018	0.647077	0.0175594	0.0600725	2.2569	TRUE	FALSE	FALSE	FALSE
Atp11c	154.436	-0.789056	0.000214984	0.0015924	3.66612	TRUE	TRUE	TRUE	TRUE
Atp13a2	104.46	0.773621	0.0104878	0.0397453	2.1513	TRUE	TRUE	FALSE	FALSE
Atp13a3	286.454	-0.343117	0.0253552	0.0799649	2.98268	FALSE	TRUE	TRUE	TRUE
Atp1a1	401.545	1.11513	2.48e-10	7.55e-09	5.97696	TRUE	FALSE	FALSE	FALSE
Atp1b1	134.973	0.747998	0.00272547	0.0134113	2.89999	TRUE	TRUE	TRUE	TRUE
Atp1b2	222.704	0.455888	0.0473064	0.128883	1.64417	TRUE	TRUE	TRUE	TRUE
Atp1b3	1505.26	0.477653	0.00263702	0.0130535	2.85939	TRUE	TRUE	TRUE	FALSE
Atp2a2	857.094	0.852706	8.51e-10	2.37e-08	6.94122	TRUE	TRUE	TRUE	FALSE
Atp2b3	55.1348	-1.83053	5.97e-08	1.15e-06	3.35942	TRUE	TRUE	TRUE	TRUE
Atp2b4	960.439	0.422045	0.0017441	0.0093293	3.7416	TRUE	TRUE	TRUE	TRUE
Atp5a1	839.872	0.84689	3.28e-10	9.82e-09	7.23188	TRUE	TRUE	FALSE	FALSE
Atp5b	2066.49	0.458636	0.000378733	0.00257824	3.86729	TRUE	TRUE	TRUE	FALSE
Atp5c1	485.787	-1.06565	8.89e-09	2.07e-07	3.90619	TRUE	TRUE	FALSE	FALSE
Atp5d	229.493	1.67337	1.26e-16	9.67e-15	10.4532	TRUE	FALSE	TRUE	FALSE
Atp5e	186.592	0.613428	0.00777258	0.0312875	2.36811	FALSE	FALSE	TRUE	FALSE
Atp5pb	352.518	-0.964692	2.9e-06	3.75e-05	2.89588	TRUE	FALSE	FALSE	FALSE
Atp5g1	116.752	-2.06379	6.51e-20	6.87e-18	18.093	TRUE	TRUE	TRUE	FALSE
Atp5g2	20.9406	-1.68798	0.000169974	0.00131393	3.70429	FALSE	TRUE	FALSE	FALSE
Atp5g3	123.826	0.909099	0.00610895	0.0258568	2.0146	TRUE	TRUE	FALSE	TRUE
Atp5j	378.298	-0.594009	0.000516775	0.00336725	2.64284	TRUE	TRUE	FALSE	FALSE
Atp5k	76.9809	-1.09199	0.00436577	0.0197129	1.24518	FALSE	FALSE	TRUE	FALSE
Atp5l	68.384	-2.63671	4.3e-14	2.34e-12	3.24067	TRUE	TRUE	TRUE	TRUE
Dmac2l	171.948	-0.529267	0.0134407	0.048537	2.69215	TRUE	TRUE	TRUE	TRUE
Dmac2	158.246	0.582443	0.00742255	0.0302202	2.88201	TRUE	FALSE	TRUE	FALSE
Atp6ap1l	236.912	-1.11168	8.54e-05	0.000724456	1.87475	FALSE	FALSE	FALSE	FALSE
Atp6ap2	69.519	-0.713324	0.0172493	0.059243	1.56907	TRUE	TRUE	TRUE	FALSE
Atp6v0a1	136.558	0.781893	0.0163172	0.0567247	1.78532	TRUE	TRUE	FALSE	FALSE
Atp6v0a2	170.706	0.391487	0.048928	0.132255	3.13381	TRUE	TRUE	TRUE	TRUE
Atp6v0b	234.289	0.429616	0.00901455	0.0351999	6.76348	TRUE	FALSE	TRUE	FALSE
Atp6v0d1	142.018	0.607324	0.00404024	0.0184577	4.04576	FALSE	FALSE	TRUE	FALSE
Atp6v0e	100.641	-1.30909	1.03e-05	0.000112822	2.41307	TRUE	TRUE	TRUE	FALSE
Atp6v1e1	148.208	-0.61104	0.00305101	0.0147312	3.4869	TRUE	FALSE	FALSE	FALSE
Atp6v1e2	384.69	1.11402	2.27e-11	8.16e-10	7.77093	FALSE	FALSE	TRUE	FALSE
Atp6v1g1	286.408	-1.24186	3.75e-12	1.49e-10	6.15386	TRUE	TRUE	TRUE	FALSE
Atp6v1h	339.938	-0.737802	2.08e-05	0.00020855	3.46031	TRUE	TRUE	FALSE	FALSE
Atp7a	132.349	-0.414751	0.0323084	0.0966022	5.62135	TRUE	TRUE	TRUE	FALSE
Atp8a1	72.9193	-1.14143	5.11e-06	6.17e-05	10.0519	TRUE	TRUE	TRUE	TRUE
Atp8a2	422.726	-0.473282	0.00145218	0.00800474	3.48949	TRUE	TRUE	TRUE	FALSE
Atp8b3	12582.2	0.835899	1.71e-08	3.74e-07	6.70633	TRUE	TRUE	TRUE	FALSE
Atp9a	404.284	0.816147	0.00158005	0.00857493	2.84216	TRUE	TRUE	FALSE	TRUE
Atpaf1	28.7935	-1.70159	3.9e-05	0.000363774	2.46004	TRUE	TRUE	TRUE	TRUE
Atpaf2	208.927	0.511325	0.00932258	0.0361552	3.00918	TRUE	TRUE	TRUE	FALSE
Atr	3851.86	-0.778188	1.82e-05	0.000185548	2.53811	TRUE	TRUE	FALSE	FALSE
Atrnl1	145.178	-0.875101	0.000410508	0.00276567	2.14448	TRUE	TRUE	TRUE	TRUE
Atxn10	988.555	0.438248	0.00483715	0.0214226	2.66627	TRUE	TRUE	TRUE	FALSE
Atxn1l	609.543	0.698618	1.2e-05	0.000128866	4.95071	TRUE	TRUE	TRUE	TRUE
Atxn2	694.737	1.07651	2.58e-11	9.25e-10	6.21004	TRUE	TRUE	TRUE	FALSE
Atxn2l	4560.48	1.37144	3.67e-22	4.88e-20	8.15711	TRUE	TRUE	TRUE	FALSE
Atxn7	197.257	0.409646	0.0488848	0.132197	1.88719	TRUE	TRUE	TRUE	TRUE
Atxn7l1	425.011	0.76529	2.15e-05	0.000214977	4.1575	TRUE	TRUE	TRUE	FALSE
Nkapd1	93.6187	-0.703008	0.00203361	0.0105412	8.17174	TRUE	FALSE	TRUE	FALSE
AU022252	50.3049	0.834725	0.0104005	0.0394718	4.61544	TRUE	TRUE	TRUE	FALSE
AU022754	4.0903	-6.93816	5.3e-06	6.36e-05	19.0165	TRUE	FALSE	FALSE	FALSE
AU022793	2.96575	-3.87184	0.0163906	0.0569257	1.00776	TRUE	FALSE	FALSE	FALSE
AU040320	473.432	0.862207	6.65e-07	1.01e-05	5.53841	TRUE	TRUE	TRUE	TRUE
AU040972	5.00842	-2.47277	0.0271104	0.0843059	1.29792	FALSE	FALSE	FALSE	FALSE
AU041133	15.5744	-1.44579	0.0101555	0.0387351	1.50424	TRUE	TRUE	TRUE	TRUE
Aurkaip1	226.769	-1.1205	1.31e-06	1.85e-05	3.37922	FALSE	FALSE	FALSE	FALSE
Aurkc	43.336	-2.12788	2.6e-08	5.43e-07	9.45493	TRUE	FALSE	FALSE	FALSE
Auts2	66.5256	1.27394	0.000135376	0.00108271	4.06053	TRUE	TRUE	TRUE	FALSE
Avl9	179.097	-0.684437	0.00042482	0.00285051	3.08138	TRUE	TRUE	TRUE	TRUE
Avpr1b	167.186	-11.3302	3.8e-21	4.42e-19	7.29339	TRUE	TRUE	TRUE	FALSE
AW046200	40.8277	-2.31692	8.39e-07	1.25e-05	2.21959	FALSE	FALSE	FALSE	FALSE
AW146154	13.1874	-1.23297	0.0295452	0.0902626	1.55951	TRUE	TRUE	TRUE	FALSE
Rimoc1	323.493	-1.90054	5.53e-25	8.7e-23	7.00814	TRUE	FALSE	FALSE	FALSE
AW554918	673.449	-0.438262	0.0140955	0.0504526	1.80109	TRUE	TRUE	TRUE	FALSE
Awat2	18.8158	-1.74019	0.000466702	0.00309287	2.57285	TRUE	TRUE	TRUE	TRUE
Axin1	199.23	1.13936	1.66e-08	3.65e-07	7.69663	TRUE	TRUE	TRUE	FALSE
Axin2	2318	-7.60417	0	0	17.3154	TRUE	TRUE	TRUE	TRUE
AY512931	10.0114	-2.16105	0.00115115	0.00660473	3.52296	FALSE	FALSE	FALSE	FALSE
AY702102	280.962	-1.23515	4.56e-05	0.000418279	1.89411	FALSE	FALSE	FALSE	FALSE
Aym1	27.7445	-0.909991	0.046863	0.128211	2.47765	TRUE	TRUE	FALSE	FALSE
Azin1	820.868	-0.446609	0.000208498	0.00155445	7.55544	TRUE	TRUE	TRUE	FALSE
Azin2	735.378	0.859847	1.2e-06	1.72e-05	4.7169	TRUE	FALSE	TRUE	TRUE
B330016D10Rik	57.2421	-0.861492	0.0180661	0.0612966	1.44803	TRUE	FALSE	FALSE	FALSE
B3galt1	14.0143	-1.33248	0.0190569	0.0639706	2.47262	TRUE	TRUE	TRUE	FALSE
B3galt2	49.3736	-3.51517	4.3e-22	5.65e-20	15.4667	TRUE	TRUE	TRUE	TRUE
B3gat2	15.9657	-1.4873	0.00387168	0.0178125	2.46228	TRUE	TRUE	TRUE	FALSE
B3gnt9	20.5826	-1.08933	0.0137306	0.0494081	2.25282	TRUE	TRUE	TRUE	FALSE
B4galnt3	61.5457	1.51782	3.49e-06	4.43e-05	7.87418	FALSE	TRUE	TRUE	FALSE
B4galt5	84.93	0.858473	0.0151344	0.0535099	1.97661	TRUE	TRUE	TRUE	FALSE
B4galt7	31.6275	2.18226	0.000320751	0.00222587	3.94544	TRUE	TRUE	TRUE	FALSE
Bmt2	84.1173	-0.789698	0.00308009	0.0148402	2.19216	TRUE	TRUE	TRUE	TRUE
B930018H19Rik	11.3379	-1.69802	0.00316571	0.0151567	5.80629	FALSE	FALSE	FALSE	FALSE
Babam1	151.049	0.42923	0.0465089	0.127645	2.14544	FALSE	FALSE	TRUE	FALSE
Bach1	15.2499	1.66031	0.0215155	0.0702972	2.27963	TRUE	TRUE	TRUE	FALSE
Bag1	1435.02	0.675125	5.44e-05	0.000487257	3.344	TRUE	TRUE	FALSE	FALSE
Bag2	26.519	1.35774	0.0285077	0.0876803	1.74369	TRUE	TRUE	TRUE	FALSE
Bag3	168.587	0.817233	0.00154888	0.00843334	2.69779	TRUE	TRUE	TRUE	TRUE
Bag5	2531.75	0.812443	4.49e-10	1.31e-08	5.30765	TRUE	TRUE	TRUE	FALSE
Bag6	4919.04	1.35412	7.74e-32	1.81e-29	14.5114	FALSE	TRUE	FALSE	FALSE
Baiap2	604.744	0.700612	5.63e-06	6.7e-05	4.97011	TRUE	FALSE	TRUE	FALSE
Baiap3	4.95758	3.20906	0.0184348	0.0622024	4.87381	FALSE	TRUE	TRUE	TRUE
Bak1	50.2229	1.19164	0.00130136	0.00732798	3.41923	TRUE	TRUE	TRUE	FALSE
Barhl2	7.79793	-2.5553	0.0110834	0.0415279	2.39266	TRUE	TRUE	TRUE	TRUE
Basp1	144.237	0.660254	0.020083	0.0666306	1.74444	TRUE	TRUE	FALSE	FALSE
Baz1a	1634.08	-0.328152	0.012922	0.0470457	2.8339	TRUE	TRUE	TRUE	TRUE
Baz1b	223.399	0.594658	0.00271806	0.0133884	3.34064	FALSE	TRUE	TRUE	FALSE
Baz2a	3196.61	0.530463	4.1e-05	0.000380049	4.7029	TRUE	TRUE	TRUE	FALSE
BB014433	1136.12	0.706325	1.66e-08	3.65e-07	7.17084	FALSE	FALSE	FALSE	FALSE
BB031773	6.02233	-2.47491	0.00873268	0.0343492	1.65764	FALSE	FALSE	FALSE	FALSE
Bbox1	20.8155	-1.47754	0.00965026	0.0371733	1.58455	TRUE	TRUE	TRUE	FALSE
Bbs10	112.218	-0.645854	0.00722548	0.0295479	2.01775	FALSE	TRUE	TRUE	FALSE
Bbs5	443.829	-0.553152	0.0437081	0.121877	1.04209	FALSE	FALSE	FALSE	FALSE
Bbs9	882.157	-0.666933	0.00492541	0.0217082	1.53783	TRUE	TRUE	TRUE	TRUE
BC005561	420.387	-1.35843	8.06e-10	2.26e-08	5.0728	FALSE	FALSE	FALSE	FALSE
BC005624	66.4046	1.47448	3.97e-06	4.95e-05	7.03395	TRUE	TRUE	TRUE	TRUE
BC024978	128.935	0.889135	0.000268644	0.00192881	3.84697	TRUE	TRUE	TRUE	TRUE
BC029722	41.9015	1.05666	0.00467834	0.0208407	4.38239	FALSE	FALSE	TRUE	FALSE
BC030336	112.063	-0.963359	5.84e-06	6.92e-05	4.61624	FALSE	FALSE	FALSE	FALSE
BC030499	82.3936	-0.503315	0.0301756	0.0917264	4.83374	FALSE	TRUE	FALSE	FALSE
BC030867	169.28	1.33654	5.8e-09	1.41e-07	5.86528	FALSE	TRUE	FALSE	FALSE
BC031181	96.2292	-0.636744	0.0213807	0.0699643	1.50603	TRUE	TRUE	FALSE	FALSE
BC037034	1362.72	-3.4569	1e-106	7.95e-104	8.59739	FALSE	TRUE	FALSE	FALSE
BC042761	2.467	-2.89652	0.0316494	0.0952248	1.35964	FALSE	FALSE	FALSE	FALSE
BC048502	348.82	-0.570596	0.045375	0.125419	1.0713	FALSE	FALSE	FALSE	FALSE
BC048507	160.62	0.847748	0.000401937	0.00271493	3.1999	TRUE	TRUE	TRUE	FALSE
BC048562	129.903	0.661726	0.0274727	0.0852149	1.68765	FALSE	FALSE	FALSE	FALSE
BC048671	739.512	0.36459	0.00540614	0.0234532	3.98102	TRUE	TRUE	FALSE	FALSE
BC049730	360.291	-0.866089	1.64e-08	3.61e-07	8.59016	FALSE	FALSE	FALSE	FALSE
BC049762	939.934	-0.675347	3.61e-05	0.000339399	4.76386	TRUE	FALSE	TRUE	FALSE
BC051019	3.83517	-2.4624	0.041334	0.116706	1.09746	TRUE	TRUE	FALSE	TRUE
BC055324	112.486	-0.889342	0.000169692	0.00131231	2.5671	TRUE	FALSE	TRUE	FALSE
BC061237	260.703	-1.65892	2.2e-07	3.73e-06	2.13315	TRUE	TRUE	FALSE	FALSE
BC089491	1172.15	0.951596	3.08e-09	7.77e-08	4.62676	FALSE	TRUE	FALSE	FALSE
Bc1-ps1	1.33295	-5.33125	0.0228925	0.073753	1.37451	FALSE	FALSE	FALSE	FALSE
BC100451	2381.71	0.828531	1.35e-14	7.87e-13	10.9092	FALSE	FALSE	FALSE	FALSE
Bcam	17.9026	1.73335	0.00785167	0.0315016	2.70093	TRUE	FALSE	TRUE	FALSE
Bcan	4.63761	-2.90808	0.0020471	0.0106051	14.0199	TRUE	TRUE	TRUE	FALSE
Bcap29	1617.91	-0.910028	2.06e-05	0.000207801	2.9652	TRUE	TRUE	TRUE	TRUE
Bcar1	162.045	0.797164	0.00133442	0.00747527	2.84902	TRUE	FALSE	TRUE	FALSE
Bcas1	102.896	1.10105	0.00010763	0.000888044	3.70073	TRUE	FALSE	TRUE	FALSE
Bcas2	334.267	0.437345	0.00768802	0.0309949	3.375	TRUE	TRUE	TRUE	FALSE
Bcas3os1	4.36762	-3.77729	0.00478248	0.0212269	0.890841	FALSE	FALSE	FALSE	FALSE
Bcat2	85.2779	0.802153	0.00837212	0.0331668	2.48121	TRUE	TRUE	TRUE	FALSE
Bccip	73.4968	-1.2042	3.07e-06	3.95e-05	3.58555	FALSE	FALSE	FALSE	FALSE
Bckdk	26.6939	0.994442	0.0348905	0.10294	2.26601	TRUE	TRUE	TRUE	FALSE
Bcl11a	119.45	-0.587773	0.0177294	0.0605345	1.70886	TRUE	TRUE	TRUE	TRUE
Bcl2l1	477.054	0.358168	0.0110054	0.041312	3.72672	TRUE	TRUE	TRUE	FALSE
Bcl7b	120.402	1.54931	9.24e-10	2.56e-08	8.93502	TRUE	TRUE	FALSE	FALSE
Bcl7c	110.694	1.08998	3.8e-06	4.77e-05	12.0604	TRUE	TRUE	TRUE	FALSE
Bcl9	122.705	0.600494	0.00646254	0.0270461	3.87917	TRUE	TRUE	TRUE	TRUE
Bcl9l	79.1062	2.26405	1.51e-09	4.03e-08	4.58904	TRUE	TRUE	TRUE	FALSE
Bcorl1	87.0371	1.40206	6.26e-07	9.57e-06	7.61939	TRUE	TRUE	TRUE	FALSE
Bcr	152.038	0.912514	0.00331098	0.0157044	2.48623	TRUE	TRUE	TRUE	TRUE
Bdh1	54.2144	1.58407	1.93e-05	0.00019493	4.8661	TRUE	TRUE	TRUE	FALSE
Bdnf	5.65195	-2.01308	0.0169686	0.0584548	2.89251	TRUE	TRUE	TRUE	FALSE
Becn1	352.784	0.937104	6.26e-06	7.33e-05	4.33685	TRUE	TRUE	TRUE	TRUE
Begain	13.3129	1.98764	0.00793998	0.0317858	3.5688	TRUE	FALSE	TRUE	FALSE
Bend4	262.239	0.605284	0.00909767	0.0354475	1.94848	FALSE	TRUE	TRUE	FALSE
Bend6	10.1794	-1.33665	0.0257223	0.0808295	4.67395	TRUE	TRUE	TRUE	TRUE
Bet1l	94.8273	-0.782895	0.00795608	0.0318296	1.53745	TRUE	TRUE	TRUE	FALSE
Bfsp2	9.20992	-5.21371	4.63e-08	9.17e-07	4.50077	TRUE	FALSE	TRUE	TRUE
Bhlha15	3.31332	-2.19977	0.0427722	0.119885	7.3043	TRUE	TRUE	TRUE	TRUE
Bhmt	91.5986	-1.40219	0.00026553	0.0019087	1.45531	TRUE	TRUE	TRUE	FALSE
Bicc1	28.8101	1.09146	0.0249383	0.0790052	2.03424	TRUE	TRUE	TRUE	FALSE
Bicd1	36.3776	-0.998857	0.00566075	0.024315	2.42956	TRUE	TRUE	TRUE	TRUE
Bin2	95.1687	1.68153	5.66e-08	1.1e-06	5.50036	FALSE	FALSE	FALSE	FALSE
Birc3	643.794	-0.596446	5.03e-05	0.000455283	5.94581	TRUE	TRUE	TRUE	TRUE
Birc6	934.597	-0.453058	0.0116856	0.0432516	2.09473	TRUE	FALSE	FALSE	FALSE
Blcap	107.334	-0.708819	0.00101774	0.00595156	3.51565	TRUE	TRUE	TRUE	FALSE
Blm	233.786	0.352092	0.0479488	0.130206	2.4608	TRUE	TRUE	TRUE	FALSE
Bloc1s2	50.3452	-0.685215	0.0276591	0.0856765	2.44048	FALSE	FALSE	TRUE	FALSE
Bloc1s6	70.0175	1.04269	0.0114547	0.0425874	1.72023	TRUE	TRUE	TRUE	TRUE
Bmp2	2.80927	-3.88427	0.0101769	0.0388087	1.51277	TRUE	TRUE	TRUE	FALSE
Bmp3	11.813	-1.6114	0.0115743	0.0429559	2.28694	TRUE	TRUE	TRUE	TRUE
Bmpr1a	203.151	-0.4755	0.0102893	0.0391556	2.83629	TRUE	TRUE	TRUE	FALSE
Bmpr2	250.127	-0.622079	0.00092498	0.00547755	3.36054	FALSE	TRUE	TRUE	TRUE
Bms1	1018.62	0.44093	0.0335969	0.0998009	1.66532	TRUE	TRUE	TRUE	FALSE
Bnip3	52.3769	-1.2884	0.000100679	0.000837508	3.48124	TRUE	TRUE	TRUE	TRUE
Bnip3l	168.911	-0.571939	0.0118524	0.0437899	2.40117	TRUE	TRUE	TRUE	FALSE
Bod1	163.722	0.677292	0.00176102	0.00940324	3.37623	TRUE	TRUE	TRUE	FALSE
Bok	17.5422	-1.48269	0.00618009	0.0260974	1.62635	TRUE	FALSE	TRUE	FALSE
Bola3	115.267	-0.477972	0.03861	0.110902	2.006	TRUE	TRUE	TRUE	FALSE
Boll	871.468	-1.15832	3.89e-17	3.2e-15	7.68363	FALSE	FALSE	TRUE	FALSE
Bora	177.214	0.465178	0.0472462	0.128758	1.70684	TRUE	TRUE	TRUE	FALSE
Bpgm	466.812	0.383016	0.0115976	0.043013	3.07341	TRUE	TRUE	TRUE	FALSE
Bpifb9a	3.42109	-3.73047	0.00172761	0.00926556	5.00876	TRUE	FALSE	FALSE	FALSE
Bpifb9b	6.16319	-5.66994	5.23e-05	0.000469943	1.94962	TRUE	FALSE	FALSE	FALSE
Bptf	975.804	1.12922	2.14e-15	1.41e-13	9.61416	TRUE	TRUE	TRUE	TRUE
Brap	1660.05	0.92839	1.17e-14	6.91e-13	12.1122	TRUE	TRUE	TRUE	FALSE
Brca1	217.983	-0.451836	0.0181465	0.0614912	2.17208	TRUE	FALSE	TRUE	FALSE
Brcc3	27.7134	-1.69396	3.56e-05	0.000335224	2.68323	TRUE	TRUE	TRUE	FALSE
Brd1	345.468	0.85223	2.27e-05	0.000225597	4.38311	TRUE	TRUE	TRUE	FALSE
Brd2	1962.89	0.620147	5.31e-09	1.29e-07	11.495	TRUE	TRUE	TRUE	TRUE
Brd3	1010.45	1.17693	1.46e-12	6.19e-11	8.27339	TRUE	TRUE	TRUE	FALSE
Brd4	273.446	1.89568	2.54e-13	1.22e-11	4.60917	TRUE	TRUE	TRUE	TRUE
Babam2	165.281	0.54335	0.00880613	0.0345767	2.89366	TRUE	FALSE	TRUE	FALSE
Zfp36l1	301.504	0.850737	2.09e-05	0.00021001	4.49218	TRUE	TRUE	TRUE	TRUE
Zfp36l2	88.4753	0.952747	0.00026422	0.00190003	5.6225	TRUE	TRUE	TRUE	FALSE
Bri3bp	137.755	0.562698	0.00546159	0.0236488	8.79102	TRUE	TRUE	TRUE	TRUE
Brinp3	43.5514	-1.0934	0.00809104	0.0322282	1.45729	TRUE	TRUE	TRUE	TRUE
Brk1	170.079	-0.816293	0.000852064	0.00513235	1.97125	TRUE	TRUE	TRUE	FALSE
Brms1	598.74	0.50244	0.0190761	0.0640113	2.07397	TRUE	FALSE	TRUE	FALSE
Brms1l	94.7709	-0.541894	0.0229399	0.0738798	2.03197	TRUE	TRUE	TRUE	FALSE
Brox	70.0697	-0.902401	0.04137	0.11679	1.05145	TRUE	TRUE	TRUE	TRUE
Brpf3	649.117	0.539112	0.00431717	0.0195273	2.56182	TRUE	FALSE	TRUE	FALSE
Brsk1	247.873	0.727552	5.67e-05	0.000504638	5.33725	TRUE	FALSE	TRUE	FALSE
Bscl2	1905.69	0.85386	1.58e-05	0.000164187	4.21577	FALSE	FALSE	FALSE	FALSE
Bsdc1	312.311	0.945737	1.14e-08	2.59e-07	8.94484	TRUE	FALSE	TRUE	FALSE
Bsg	1492.68	0.569176	0.000631918	0.0039907	3.00892	FALSE	FALSE	FALSE	FALSE
Bsn	62.1719	0.861909	0.00818085	0.0325433	3.02816	TRUE	TRUE	TRUE	FALSE
Btaf1	1875.69	-0.803333	7.05e-14	3.69e-12	10.4427	TRUE	TRUE	TRUE	FALSE
Btbd8	20.6316	-1.16313	0.0117195	0.0433683	1.92313	FALSE	FALSE	TRUE	FALSE
Btf3l4	176.025	-1.10932	5.01e-05	0.000453803	2.66243	TRUE	TRUE	TRUE	TRUE
Btg1	661.595	-1.08314	1.04e-09	2.85e-08	4.43852	TRUE	TRUE	TRUE	TRUE
Btg1c	28.6858	-1.32323	0.000795765	0.00485411	5.34484	FALSE	FALSE	FALSE	FALSE
Btg3	3.89821	-3.10222	0.0118132	0.043672	1.14364	FALSE	TRUE	TRUE	TRUE
Btrc	385.085	0.406037	0.0268436	0.0836617	2.06585	TRUE	TRUE	TRUE	FALSE
Bub1	647.276	-0.742189	0.00521771	0.0227656	1.40891	TRUE	TRUE	TRUE	FALSE
Bub3	219.52	-0.516231	0.00547557	0.0236871	2.41884	TRUE	TRUE	TRUE	FALSE
Bud13	76.2977	1.21685	3.7e-05	0.000347167	5.65011	TRUE	TRUE	FALSE	FALSE
Bzw1	840.113	-0.540549	0.00253054	0.0126119	2.96066	TRUE	TRUE	TRUE	TRUE
Zfp607b	79.802	-0.605224	0.0345694	0.102108	1.54071	TRUE	FALSE	TRUE	TRUE
C130074G19Rik	41.9687	1.34884	0.00192176	0.0100355	2.82566	TRUE	TRUE	TRUE	FALSE
C1galt1	125.977	-1.04493	0.00345068	0.016219	1.2595	TRUE	TRUE	TRUE	FALSE
C1galt1c1	17.7408	-1.29453	0.0227198	0.0733392	1.26855	FALSE	FALSE	FALSE	FALSE
C1qbp	81.4168	0.77549	0.00588455	0.0251049	3.13263	TRUE	FALSE	TRUE	FALSE
C1qtnf1	6.8643	2.74802	0.0199586	0.0663384	4.81816	TRUE	TRUE	TRUE	FALSE
C1qtnf2	11.9648	5.57951	9.52e-06	0.000105125	24.4808	FALSE	FALSE	TRUE	FALSE
C1qtnf3	74.5231	-0.709186	0.0139913	0.0501384	2.65288	TRUE	TRUE	TRUE	TRUE
Snhg14	159.821	-2.54587	7.6e-22	9.77e-20	4.35271	FALSE	FALSE	FALSE	FALSE
C2cd2	90.8938	-1.01189	1.01e-05	0.000110816	9.46259	TRUE	TRUE	TRUE	FALSE
C2cd5	134.458	0.635707	0.00341723	0.0161165	4.70241	TRUE	TRUE	TRUE	FALSE
C3	85.9222	1.52785	0.000307853	0.00216018	2.2997	FALSE	FALSE	FALSE	FALSE
Tmem250-ps	122.796	0.599674	0.0110573	0.0414642	2.99748	FALSE	FALSE	TRUE	FALSE
Steep1	23.3517	-1.11116	0.0138846	0.049805	1.59979	TRUE	FALSE	FALSE	FALSE
C330018D20Rik	53.3722	-0.813964	0.00517121	0.0225951	5.46367	TRUE	TRUE	TRUE	TRUE
Rps23rg1	22.009	-6.50194	6.4e-15	3.99e-13	8.45539	TRUE	FALSE	TRUE	FALSE
Cip2a	405.39	-0.659518	0.00964183	0.0371486	1.44521	TRUE	FALSE	FALSE	FALSE
C4bp	6.87062	-5.22004	2.8e-06	3.65e-05	2.6933	TRUE	TRUE	TRUE	FALSE
Cracd	2992.97	0.927372	7.11e-11	2.35e-09	5.42788	TRUE	FALSE	TRUE	FALSE
C730002L08Rik	6.23862	-2.79745	0.000472538	0.00312361	15.7843	FALSE	FALSE	FALSE	FALSE
C77080	22.6578	1.22238	0.0394418	0.112706	1.70588	TRUE	TRUE	TRUE	FALSE
Nexmif	52.953	-0.95074	0.0059035	0.0251564	1.80141	TRUE	FALSE	TRUE	TRUE
C8g	85.7182	-0.872496	0.00380966	0.0175892	1.6445	TRUE	FALSE	FALSE	FALSE
Cab39	1154.05	-1.75764	4.15e-28	7.57e-26	7.89205	TRUE	TRUE	TRUE	TRUE
Cabin1	271.701	0.599189	0.0111481	0.0417018	2.11771	TRUE	FALSE	FALSE	FALSE
Cables2	95.9164	0.762191	0.00292439	0.0142404	3.81781	TRUE	TRUE	TRUE	FALSE
Cabp7	1.43092	-5.40382	0.0196508	0.0655302	1.38381	FALSE	TRUE	TRUE	FALSE
Cabs1	4129.91	-0.75853	0.0135654	0.0488712	1.27001	TRUE	TRUE	FALSE	FALSE
Cabyr	2294.78	0.34015	0.0266622	0.0831816	2.13444	TRUE	FALSE	TRUE	FALSE
Cacna1b	17.3563	2.15577	0.00271627	0.0133841	2.88447	TRUE	TRUE	TRUE	FALSE
Cacna1c	158.545	-3.04049	9.77e-31	2.17e-28	5.38161	FALSE	TRUE	TRUE	TRUE
Cacna1h	1304.04	1.22909	2.19e-12	9.04e-11	5.94823	TRUE	TRUE	TRUE	FALSE
Cacna1i	45.031	-0.972814	0.0017904	0.00950176	4.26259	TRUE	TRUE	TRUE	FALSE
Cacna2d3	25.1434	-1.05278	0.0390436	0.111848	1.81269	TRUE	FALSE	FALSE	FALSE
Cacnb1	240.252	0.447516	0.0213275	0.0698398	2.43143	TRUE	TRUE	TRUE	FALSE
Cacnb3	17.4404	2.15706	0.00109317	0.00632574	6.62952	TRUE	TRUE	TRUE	FALSE
Cacnb4	59.4041	-1.27292	1.13e-05	0.000122666	3.90999	TRUE	TRUE	TRUE	TRUE
Cacng8	24.9412	1.84185	0.000474562	0.00313245	6.06992	FALSE	TRUE	TRUE	FALSE
Cacul1	807.182	1.05465	4.77e-15	2.98e-13	11.8605	TRUE	TRUE	TRUE	TRUE
Cacybp	256.409	-0.590903	0.0112425	0.0419605	1.71002	TRUE	TRUE	TRUE	TRUE
Cad	158.526	1.32953	1.97e-06	2.68e-05	3.11534	TRUE	TRUE	FALSE	FALSE
Cadm2	79.318	-1.54472	2.11e-07	3.61e-06	2.91969	TRUE	TRUE	TRUE	TRUE
Cadps2	29.9751	-1.82348	6.01e-06	7.1e-05	2.7752	TRUE	TRUE	TRUE	TRUE
Calcoco1	92.7827	0.870149	0.00177894	0.00946299	3.22775	TRUE	TRUE	TRUE	FALSE
Cald1	66.3373	0.918821	0.00691971	0.0285343	2.4957	TRUE	TRUE	TRUE	FALSE
Calm1	3406.6	-0.278869	0.0315251	0.0949447	2.17392	TRUE	TRUE	TRUE	FALSE
Calm2	1516.13	-1.07441	5.68e-06	6.76e-05	2.33077	TRUE	TRUE	TRUE	FALSE
Calr	2776.98	0.722318	3.72e-05	0.000348422	2.77346	TRUE	TRUE	TRUE	FALSE
Camk1	5.14877	4.36435	0.00162781	0.00880269	4.50773	FALSE	FALSE	FALSE	FALSE
Camk1d	3317.26	-4.36073	6.08e-06	7.16e-05	7.92694	TRUE	TRUE	TRUE	TRUE
Camk2n1	335.178	0.803768	0.000196549	0.00148109	3.36147	TRUE	TRUE	TRUE	FALSE
Camk2n2	57.7445	0.847233	0.0116196	0.0430772	2.65596	TRUE	TRUE	TRUE	FALSE
Camkv	38.8842	0.972409	0.0102325	0.0389882	4.76637	TRUE	TRUE	TRUE	FALSE
Camsap1	1975.47	0.52349	4.31e-06	5.32e-05	6.42609	TRUE	TRUE	TRUE	FALSE
Camsap3	149.124	1.03902	2.13e-06	2.89e-05	6.63544	TRUE	FALSE	FALSE	FALSE
Camta1	116.857	-0.524149	0.0424824	0.119376	1.65825	TRUE	TRUE	TRUE	TRUE
Camta2	95.3781	0.94711	0.0159766	0.0558708	1.67661	TRUE	FALSE	FALSE	FALSE
Cant1	197.113	0.39025	0.0374344	0.108395	2.97974	TRUE	TRUE	TRUE	FALSE
Cap1	447.688	0.956073	1.22e-11	4.56e-10	16.7047	TRUE	TRUE	TRUE	FALSE
Capn11	305.681	0.777647	9.22e-05	0.000773626	3.67221	FALSE	FALSE	FALSE	FALSE
Capn15	90.5584	0.615494	0.046255	0.127164	1.6946	FALSE	FALSE	TRUE	FALSE
Capns1	1010.35	0.330142	0.0152201	0.0537606	2.7118	TRUE	TRUE	TRUE	FALSE
Cadps2	108.091	-0.738265	0.00800633	0.0319955	1.82624	TRUE	TRUE	TRUE	TRUE
Capza1	401.265	-1.69273	7.04e-14	3.69e-12	3.54687	TRUE	TRUE	TRUE	FALSE
Capza2	196.996	-0.624224	0.000473334	0.00312644	4.17548	TRUE	TRUE	TRUE	TRUE
Capza3	1178.63	-0.764133	0.0102795	0.0391266	1.22175	FALSE	FALSE	TRUE	FALSE
Capzb	1171.05	0.705431	9.7e-07	1.42e-05	4.76811	TRUE	TRUE	TRUE	FALSE
Car13	5.81995	-1.70225	0.0364552	0.106268	2.44812	TRUE	TRUE	TRUE	FALSE
Car14	12.2614	-2.97037	1.22e-06	1.74e-05	10.7942	TRUE	TRUE	FALSE	FALSE
Car15	14.1286	1.59112	0.0329893	0.0982866	2.13367	FALSE	FALSE	FALSE	FALSE
Car4	10.6372	1.56002	0.0461582	0.12693	2.41816	TRUE	FALSE	TRUE	FALSE
Car7	24.7031	-1.18112	0.00762882	0.0308039	2.3382	TRUE	TRUE	TRUE	FALSE
Card11	2.63826	3.39473	0.0275072	0.0852928	4.51635	TRUE	TRUE	FALSE	FALSE
Carhsp1	212.419	-0.668253	0.00282323	0.0138067	2.84781	TRUE	TRUE	TRUE	TRUE
Carm1	421.5	0.828106	3.49e-07	5.64e-06	6.08408	TRUE	TRUE	TRUE	FALSE
Casc3	292.334	0.92025	5.38e-08	1.05e-06	8.3363	TRUE	TRUE	TRUE	FALSE
Knl1	583.478	-0.928022	1.48e-06	2.08e-05	3.13642	FALSE	FALSE	TRUE	FALSE
Casd1	112.412	-0.892344	2.27e-05	0.000225597	7.76003	TRUE	TRUE	TRUE	TRUE
Caskin1	81.9915	0.973395	0.0022455	0.0114477	2.7475	TRUE	FALSE	TRUE	TRUE
Casp2	61.4643	-0.69561	0.025849	0.0811437	1.40852	TRUE	TRUE	TRUE	TRUE
Casp7	9.25645	1.63363	0.0436807	0.121861	4.93204	TRUE	FALSE	TRUE	TRUE
Casq2	26.9183	-1.55067	0.000161198	0.00125674	3.73881	TRUE	TRUE	TRUE	FALSE
Casz1	99.2962	0.84268	0.00636958	0.0267552	2.22882	TRUE	TRUE	TRUE	TRUE
Catip	76.8789	0.793455	0.00435336	0.0196667	3.57663	FALSE	FALSE	TRUE	FALSE
Catsper1	781.444	0.451544	0.00405837	0.0185266	2.90235	FALSE	FALSE	TRUE	FALSE
Catsperb	789.057	-1.1281	2.41e-07	4.05e-06	3.09837	FALSE	FALSE	FALSE	FALSE
Catsperd	757.598	-0.387208	0.0279807	0.0864104	1.83464	FALSE	FALSE	FALSE	FALSE
Catsperg1	911.115	-0.808169	2.45e-06	3.25e-05	3.2139	TRUE	FALSE	FALSE	FALSE
Catsperg2	833.521	-0.945793	7.1e-07	1.07e-05	3.01006	TRUE	FALSE	TRUE	FALSE
Cav1	52.4761	-1.15633	0.00966813	0.0372185	1.37106	TRUE	TRUE	TRUE	FALSE
Cav2	18.8138	-2.03526	2.8e-05	0.000271446	3.62828	TRUE	TRUE	TRUE	FALSE
Cbfb	150.053	-0.45807	0.0172462	0.059243	3.34723	TRUE	TRUE	TRUE	TRUE
Cbl	609.218	0.357807	0.00469443	0.0209022	5.72928	TRUE	TRUE	TRUE	FALSE
Cblb	323.423	0.355011	0.018068	0.0612966	4.77747	TRUE	TRUE	TRUE	TRUE
Cbs	2.69666	3.43272	0.0261696	0.0819477	4.23454	TRUE	TRUE	TRUE	FALSE
Cbwd1	188.887	-1.05974	0.00229993	0.0116762	1.52993	FALSE	TRUE	TRUE	FALSE
Cbx3	47.8412	-1.17801	0.0010198	0.00595975	1.98899	TRUE	FALSE	TRUE	FALSE
Cbx4	37.4778	1.18568	0.00350444	0.0164343	3.47075	TRUE	TRUE	TRUE	FALSE
Cbx5	808.94	-0.81998	1.09e-07	1.99e-06	4.49977	TRUE	TRUE	TRUE	TRUE
Cbx6	40.3396	0.933092	0.0282911	0.0871904	1.96824	TRUE	TRUE	TRUE	FALSE
Cbx7	171.172	0.738803	0.00307606	0.0148286	2.54068	TRUE	TRUE	TRUE	TRUE
Cc2d1a	262.803	1.6445	1.66e-15	1.11e-13	8.20398	TRUE	TRUE	TRUE	FALSE
Cc2d1b	264.319	0.691227	0.00054633	0.00353083	3.39645	TRUE	TRUE	TRUE	FALSE
Ccar2	408.247	1.01159	0.000118538	0.00096496	3.66057	TRUE	TRUE	TRUE	TRUE
Ccbe1	144.916	-0.692533	0.00185232	0.00974819	3.22519	TRUE	TRUE	TRUE	FALSE
Sgf29	950.888	0.714127	3.3e-07	5.38e-06	6.33898	FALSE	FALSE	FALSE	FALSE
Ccdc105	456.912	1.36265	9.37e-13	4.07e-11	5.27838	FALSE	TRUE	TRUE	FALSE
Cfap65	2251.49	0.400971	0.00318217	0.0152116	3.25711	TRUE	FALSE	FALSE	FALSE
Mcub	5.36415	-4.8642	0.000395336	0.0026753	1.40252	TRUE	FALSE	TRUE	FALSE
Ccdc117	752.934	-0.62195	1e-05	0.000110288	3.81358	TRUE	TRUE	TRUE	FALSE
Ccdc120	2.9856	3.57417	0.0180724	0.0612966	4.348	TRUE	TRUE	TRUE	FALSE
Ccdc124	147.828	0.972589	0.00106612	0.00619871	2.89104	FALSE	TRUE	FALSE	FALSE
Ccdc13	694.01	0.905534	3.79e-07	6.07e-06	5.34966	FALSE	TRUE	TRUE	FALSE
Ccdc136	7579.06	0.543803	2.29e-06	3.07e-05	5.80245	TRUE	FALSE	FALSE	FALSE
Ccdc137	36.3666	-1.41944	0.00304084	0.0146924	1.51141	TRUE	TRUE	TRUE	FALSE
Ccdc138	175.661	-0.412031	0.0393727	0.112614	2.70886	TRUE	FALSE	TRUE	FALSE
Ccdc14	201.754	-0.853271	3.01e-06	3.87e-05	4.13643	TRUE	TRUE	TRUE	TRUE
Ccdc15	215.871	-0.513665	0.0450493	0.124726	1.3022	TRUE	TRUE	TRUE	FALSE
Ccdc154	131.987	-0.47237	0.0455105	0.125679	1.48663	FALSE	TRUE	FALSE	FALSE
Kash5	380.242	1.22627	1.03e-08	2.36e-07	5.7677	FALSE	FALSE	FALSE	FALSE
Ccdc171	661.432	0.50958	0.000869381	0.005216	3.3738	TRUE	TRUE	TRUE	FALSE
Ccdc178	1042.08	-0.623555	0.0365064	0.106366	1.1089	TRUE	TRUE	TRUE	FALSE
Ccdc180	457.628	0.698548	7.32e-06	8.38e-05	5.61595	TRUE	FALSE	FALSE	FALSE
Ccdc184	146.712	0.685224	0.018261	0.0617875	1.87646	TRUE	TRUE	TRUE	FALSE
Ccdc185	942.837	0.634869	0.000812127	0.00494236	3.19718	FALSE	FALSE	FALSE	FALSE
Ccdc24	290.015	0.82615	1.88e-05	0.000190389	4.24289	TRUE	TRUE	TRUE	FALSE
Ccdc25	113.503	0.588235	0.027801	0.0859848	1.96189	TRUE	TRUE	TRUE	FALSE
Ccdc27	419.187	0.777334	2.71e-06	3.54e-05	5.55871	FALSE	FALSE	TRUE	FALSE
Ccdc33	711.376	0.866116	2.93e-09	7.44e-08	6.05497	TRUE	FALSE	FALSE	FALSE
Ccdc34os	60.7575	-0.958156	0.0305556	0.0925902	1.02304	FALSE	FALSE	FALSE	FALSE
Ccdc40	877.404	0.815241	0.000212948	0.00158246	3.25666	TRUE	TRUE	TRUE	FALSE
Ccdc42	405.53	0.833397	0.000103991	0.000862311	3.34008	TRUE	TRUE	TRUE	FALSE
Ccdc47	224.453	-0.489035	0.0354012	0.103876	1.43651	TRUE	TRUE	TRUE	TRUE
Washc3	194.378	-0.675575	0.00812267	0.0323401	1.91981	TRUE	FALSE	FALSE	FALSE
Ccdc54	1784.53	-1.013	0.000386137	0.00262375	1.84436	FALSE	FALSE	FALSE	FALSE
Ccdc57	243.787	0.780282	0.000570449	0.00366594	3.13502	TRUE	FALSE	FALSE	FALSE
Ccdc6	375.588	0.673909	2.47e-05	0.000243352	5.31883	FALSE	TRUE	TRUE	TRUE
Ccdc60	2731.99	0.751824	1.76e-08	3.83e-07	6.45596	TRUE	TRUE	TRUE	FALSE
Ccdc63	1149	0.908243	9.31e-09	2.16e-07	5.26656	FALSE	FALSE	FALSE	FALSE
Bicdl1	49.638	-1.72842	3.21e-08	6.56e-07	4.97703	TRUE	FALSE	TRUE	FALSE
Ccdc65	1420.91	0.799063	2.01e-13	9.88e-12	13.5258	TRUE	FALSE	TRUE	FALSE
Ccdc68	6.95604	-1.76431	0.0251728	0.0795135	2.11737	TRUE	TRUE	FALSE	FALSE
Ccdc71	122.354	0.847786	0.000502435	0.00328201	3.90978	TRUE	TRUE	TRUE	TRUE
Ccdc73	259.004	-0.506973	0.0103122	0.0392263	2.95791	TRUE	FALSE	TRUE	FALSE
Ccdc74a	187.953	0.946272	5.34e-05	0.000479642	4.07176	TRUE	FALSE	FALSE	FALSE
Ccdc7a	557.177	0.773694	0.0193993	0.0648556	1.22971	FALSE	FALSE	TRUE	FALSE
Ccdc7b	1032.7	-0.677205	0.0448948	0.124374	1.0144	TRUE	FALSE	FALSE	FALSE
Ccdc86	165.339	0.939893	2.25e-06	3.02e-05	9.74503	TRUE	TRUE	TRUE	FALSE
Ccdc88c	848.57	0.786602	6.27e-06	7.33e-05	3.55971	TRUE	TRUE	TRUE	FALSE
Ccdc9	125.096	0.930174	0.000390263	0.00264685	3.4309	TRUE	FALSE	TRUE	FALSE
Ccdc92	2236.63	1.30213	8.68e-30	1.78e-27	20.9926	TRUE	TRUE	TRUE	FALSE
Ccdc96	1183.05	0.67223	0.000111805	0.000917514	3.39921	TRUE	TRUE	TRUE	FALSE
Ccdc97	287.247	0.622498	0.000891479	0.00532234	3.48008	TRUE	TRUE	TRUE	TRUE
Ccer1	1718.59	0.625804	0.000164068	0.00127422	3.84477	TRUE	FALSE	FALSE	FALSE
Cchcr1	1962.7	1.14444	2.03e-16	1.53e-14	7.48497	FALSE	TRUE	FALSE	FALSE
Ccl19	2.29851	-4.17168	0.0125726	0.0459294	1.4804	TRUE	TRUE	FALSE	FALSE
Ccl27a	90.1829	-0.930525	0.00216595	0.0111198	2.14601	FALSE	FALSE	FALSE	FALSE
Ccnb1	142.149	-1.2051	1.78e-05	0.00018202	2.53711	TRUE	TRUE	TRUE	FALSE
Ccnc	127.72	-1.00133	6.81e-06	7.89e-05	5.2171	TRUE	TRUE	TRUE	TRUE
Ccne2	109.826	-0.938104	3.54e-05	0.000334295	3.47889	TRUE	TRUE	TRUE	FALSE
Ccng1	94.3638	-0.950417	0.00880145	0.0345675	1.23342	TRUE	TRUE	TRUE	FALSE
Ccnjl	13.0907	1.36739	0.0406183	0.115184	3.21195	TRUE	TRUE	TRUE	FALSE
Ccnl2	233.917	0.478467	0.0064956	0.0271657	4.01816	TRUE	TRUE	TRUE	TRUE
Ccno	14.0724	1.51227	0.0201604	0.0668145	4.3634	FALSE	FALSE	TRUE	FALSE
Ccnt1	93.508	0.685969	0.00636268	0.0267438	4.27932	TRUE	TRUE	TRUE	FALSE
Ccnt2	117.771	-0.544772	0.0245737	0.0780398	1.69836	TRUE	TRUE	TRUE	FALSE
Ccpg1	738.414	0.600625	0.000134747	0.00107815	3.63555	TRUE	TRUE	TRUE	TRUE
Noct	15.8494	-1.45438	0.0461521	0.12693	1.52777	TRUE	FALSE	TRUE	FALSE
Ccr7	16.0364	-2.23831	0.000174134	0.00133928	2.67602	TRUE	TRUE	TRUE	FALSE
Ccs	124.638	0.646301	0.00513539	0.0224655	3.3579	TRUE	TRUE	FALSE	TRUE
Ccsap	330.114	0.460724	0.0279528	0.0863519	1.81453	TRUE	TRUE	TRUE	FALSE
Cct7	2353.64	0.486097	0.000481197	0.00316709	3.86523	TRUE	FALSE	TRUE	FALSE
Cd109	452.091	-0.546583	0.0370278	0.107474	1.16721	TRUE	TRUE	TRUE	FALSE
Cd164	1539.96	-0.681985	2.21e-06	2.98e-05	3.92844	TRUE	TRUE	TRUE	FALSE
Cd209a	4.60414	-6.12875	3.09e-05	0.000297303	7.30874	TRUE	TRUE	TRUE	FALSE
Cd320	384.194	-0.63531	0.000791214	0.00483605	3.27105	TRUE	TRUE	TRUE	FALSE
Cd36	574.163	-2.81059	1.53e-74	7.96e-72	12.1337	TRUE	TRUE	TRUE	FALSE
Cd40lg	2.06139	-4.03535	0.0445365	0.12355	0.76889	TRUE	TRUE	FALSE	FALSE
Cd44	12.5422	-3.80337	9.75e-09	2.25e-07	3.55802	TRUE	TRUE	TRUE	FALSE
Cd46	142.134	-0.890497	0.00344389	0.0162038	1.57508	FALSE	TRUE	TRUE	FALSE
Cd53	15.2353	-2.69155	0.000244639	0.00177711	1.5072	TRUE	TRUE	TRUE	TRUE
Cd55b	685.297	-0.505599	0.0309743	0.0935948	1.35395	FALSE	FALSE	FALSE	FALSE
Cd5l	14.3137	-6.87299	1.82e-09	4.82e-08	6.34647	TRUE	TRUE	TRUE	TRUE
Cd74	38.3289	1.89342	0.000694818	0.00433542	1.87205	TRUE	FALSE	FALSE	FALSE
Cd81	302.805	-0.385915	0.010182	0.0388119	3.53375	TRUE	FALSE	TRUE	FALSE
Cd84	11.902	-1.84753	0.0131981	0.0478787	1.32795	TRUE	TRUE	TRUE	FALSE
Cd99l2	49.0934	0.770326	0.0220097	0.0715913	3.74241	TRUE	TRUE	TRUE	FALSE
Cdc14a	987.834	0.304145	0.0416899	0.117547	2.00186	TRUE	TRUE	TRUE	FALSE
Cdc20b	48.0494	-1.65341	3.57e-08	7.24e-07	5.32972	FALSE	FALSE	FALSE	FALSE
Cdc25a	394.397	0.850423	6.56e-08	1.25e-06	7.41944	TRUE	FALSE	TRUE	FALSE
Cdc27	1330.62	-0.549765	0.000495448	0.00324566	3.25205	TRUE	TRUE	TRUE	FALSE
Cdc34	728.877	0.854835	7.91e-06	8.97e-05	3.37159	TRUE	TRUE	TRUE	TRUE
Cdc37	201.896	0.83242	8.97e-05	0.00075652	4.1278	TRUE	TRUE	TRUE	FALSE
Cdc37l1	631.979	-0.463443	0.000163864	0.00127317	5.32168	TRUE	TRUE	TRUE	TRUE
Cdc40	105.669	-0.482377	0.0475983	0.129466	2.98676	TRUE	FALSE	TRUE	FALSE
Cdc42	362.603	-0.824477	1.53e-09	4.07e-08	10.4037	TRUE	FALSE	TRUE	FALSE
Cdc42bpb	318.43	1.04093	9.81e-09	2.26e-07	5.93544	TRUE	TRUE	TRUE	FALSE
Cdc42ep4	363.743	-0.501985	0.0287447	0.0883081	1.42988	TRUE	TRUE	TRUE	TRUE
Cdc42se2	226.316	-0.548767	0.0396862	0.113209	1.31939	TRUE	TRUE	TRUE	TRUE
Cdca2	1261.38	0.277632	0.0202783	0.0671199	3.18905	TRUE	TRUE	TRUE	TRUE
Cdh2	465.281	0.571641	0.00290841	0.0141765	2.60534	TRUE	TRUE	TRUE	TRUE
Cdh20	2.61026	3.38385	0.0322012	0.0963924	2.91992	TRUE	TRUE	TRUE	FALSE
Cdh22	57.7674	-5.23747	3.05e-33	7.42e-31	4.00646	TRUE	FALSE	TRUE	FALSE
Cdh3	23.9055	1.22528	0.0125504	0.0458759	3.57496	TRUE	TRUE	TRUE	FALSE
Cdh4	20.433	-2.25406	4.42e-07	6.95e-06	5.65254	TRUE	TRUE	TRUE	FALSE
Cdk1	171.112	-0.701657	0.0069275	0.0285588	1.92604	TRUE	TRUE	TRUE	TRUE
Cdk11b	330.655	1.08977	3.18e-08	6.5e-07	5.07044	TRUE	FALSE	TRUE	FALSE
Cdk14	119.645	0.717865	0.0492344	0.132965	1.37011	TRUE	TRUE	TRUE	TRUE
Cdk16	590.742	0.447987	0.00519073	0.0226695	2.71242	TRUE	TRUE	TRUE	FALSE
Cdk19	566.96	-0.473567	0.000931846	0.00551284	3.29456	TRUE	TRUE	TRUE	TRUE
Cdk2ap2	21.9874	1.25857	0.0424958	0.119395	1.91375	TRUE	TRUE	TRUE	FALSE
Cdk5rap2	1962.37	0.581888	8.91e-05	0.000752043	3.20362	FALSE	TRUE	TRUE	FALSE
Cdk5rap3	314.472	0.454086	0.0248397	0.0787612	1.99681	TRUE	TRUE	TRUE	FALSE
Cdk8	958.762	-4.4589	1.46e-113	1.21e-110	7.05825	TRUE	TRUE	TRUE	TRUE
Cdk9	84.602	1.03232	0.00624875	0.0263446	2.34572	TRUE	TRUE	TRUE	TRUE
Cdkal1	539.212	-0.586223	0.00143823	0.00794947	2.29288	TRUE	TRUE	TRUE	TRUE
Cdkl5	209.415	-0.446502	0.0415914	0.117324	1.32555	FALSE	FALSE	FALSE	FALSE
Cdkn1c	43.3634	1.23125	0.00488885	0.0216018	2.47257	TRUE	FALSE	TRUE	FALSE
Cdkn2a	5.41094	4.43684	0.00128811	0.00726267	4.65947	TRUE	TRUE	TRUE	TRUE
Cdkn2aipnl	63.6753	-0.688991	0.00917548	0.0356985	3.53523	TRUE	TRUE	TRUE	FALSE
Cdr1	2.97787	-3.47736	0.00495856	0.0218284	14.1565	FALSE	TRUE	FALSE	FALSE
Chek2	793.996	0.583228	1.56e-05	0.000161926	5.30481	TRUE	TRUE	TRUE	FALSE
Cds2	181.926	0.539098	0.0184584	0.0622708	2.10494	TRUE	TRUE	TRUE	TRUE
Cdt1	11.5206	1.67166	0.0296568	0.0905128	2.76932	TRUE	TRUE	TRUE	TRUE
Cdv3	1007.98	0.537873	1.68e-05	0.000172971	5.86707	TRUE	TRUE	TRUE	FALSE
Cdyl	1725.93	-0.351038	0.0158289	0.0554497	2.29051	TRUE	TRUE	TRUE	TRUE
Ceacam1	7.63645	-1.69955	0.0379124	0.109484	1.61671	TRUE	TRUE	TRUE	FALSE
Ceacam18	2.98622	-2.88129	0.0156941	0.0550726	1.52751	TRUE	TRUE	TRUE	FALSE
Ceacam2	119.031	0.502565	0.0365759	0.106501	2.19573	TRUE	TRUE	TRUE	FALSE
Cebpa	412.387	-5.74054	5.8e-123	5.29e-120	14.8523	TRUE	TRUE	TRUE	FALSE
Cecr2	438.963	0.780568	2.34e-06	3.13e-05	4.98212	TRUE	TRUE	TRUE	TRUE
Cela3a	3.23945	-4.16149	0.0135158	0.0487505	1.299	FALSE	TRUE	FALSE	FALSE
Celf6	40.1725	1.13943	0.00689214	0.028446	2.69974	TRUE	TRUE	TRUE	FALSE
Celsr2	188.376	0.784141	0.00122134	0.00692902	2.564	TRUE	TRUE	TRUE	FALSE
Cenpb	81.3931	0.775685	0.00503457	0.022088	3.41502	TRUE	TRUE	TRUE	FALSE
Cenpi	84.609	-1.13579	4.06e-06	5.05e-05	5.34534	TRUE	TRUE	TRUE	FALSE
Cenpj	271.123	-0.344191	0.0455305	0.125701	2.08334	FALSE	FALSE	FALSE	FALSE
Cenpl	121.147	-1.31718	5.71e-06	6.78e-05	2.3943	TRUE	TRUE	TRUE	FALSE
Cenpp	172.736	-0.824787	0.00488089	0.021585	1.70286	TRUE	FALSE	FALSE	FALSE
Cenpt	42.8977	1.32917	0.000745962	0.00460262	4.0137	FALSE	FALSE	TRUE	FALSE
Cenpw	105.961	-1.11942	4.76e-05	0.000434461	2.46773	TRUE	TRUE	TRUE	FALSE
Cep104	627.236	0.765416	7.14e-08	1.35e-06	7.38324	TRUE	TRUE	FALSE	FALSE
Cep120	1001.55	0.378182	0.0015175	0.00829714	5.07731	TRUE	TRUE	TRUE	TRUE
Cep131	281.757	1.22827	3.21e-07	5.25e-06	4.75668	TRUE	TRUE	TRUE	FALSE
Cep135	256.909	-0.501448	0.00835613	0.0331107	2.03065	TRUE	TRUE	TRUE	FALSE
Cep164	999.963	0.766006	5.37e-06	6.43e-05	4.03623	TRUE	TRUE	TRUE	TRUE
Cep170b	311.406	1.17121	3.01e-08	6.19e-07	4.95239	TRUE	TRUE	TRUE	TRUE
Cep19	293.684	0.560548	0.0207894	0.0684887	1.76866	TRUE	TRUE	TRUE	TRUE
Cep192	884.5	-0.635013	7.9e-06	8.96e-05	4.00046	TRUE	TRUE	FALSE	TRUE
Cep250	193.285	0.794114	0.00288186	0.0140708	2.35491	TRUE	TRUE	TRUE	FALSE
Cep290	1708.8	-0.608948	0.0313596	0.0945554	1.1061	TRUE	TRUE	TRUE	TRUE
Cep295	1165.07	-0.614	0.000121674	0.000987324	2.83538	TRUE	FALSE	FALSE	FALSE
Cep57	1388.53	-0.546322	0.0269017	0.0837999	1.26501	TRUE	TRUE	TRUE	TRUE
Cep63	3026.76	0.271818	0.0341175	0.101026	2.25299	TRUE	TRUE	FALSE	FALSE
Cep72	1258.33	-0.82173	1.06e-06	1.54e-05	3.83419	TRUE	TRUE	TRUE	TRUE
Cep83os	1105.53	-1.33671	3.67e-28	6.76e-26	12.9018	FALSE	FALSE	FALSE	FALSE
Cep85	823.777	0.341779	0.0156505	0.0549723	2.74518	TRUE	TRUE	TRUE	TRUE
Cep89	539.046	0.849708	4.65e-10	1.36e-08	11.3637	TRUE	TRUE	TRUE	FALSE
Cept1	43.1188	-1.66113	0.000958587	0.00565089	1.32284	TRUE	TRUE	TRUE	TRUE
Cerk	802.762	-0.664783	1.87e-08	4.04e-07	11.7449	TRUE	TRUE	TRUE	TRUE
Cerkl	16.1827	-1.90195	0.000132555	0.00106295	7.07514	FALSE	TRUE	FALSE	FALSE
Cers3	924.257	-0.389177	0.00425013	0.0192432	2.86371	FALSE	TRUE	TRUE	FALSE
Ces5a	20.0235	-1.64987	0.000472812	0.00312429	3.18432	TRUE	FALSE	TRUE	FALSE
Cfap69	2034.05	-0.644017	2.66e-06	3.49e-05	4.05128	TRUE	FALSE	FALSE	FALSE
Cfap70	1485.68	0.291213	0.0274176	0.0850697	2.43884	FALSE	FALSE	FALSE	FALSE
Cfap97	2778.23	-0.751606	3.14e-06	4.03e-05	3.45891	TRUE	FALSE	TRUE	TRUE
Cfhr1	41.5942	-1.5591	0.000282182	0.00200862	3.17239	TRUE	FALSE	TRUE	FALSE
Cfl1	478.077	-0.515022	0.00178046	0.00946613	2.43675	FALSE	TRUE	TRUE	FALSE
Cftr	375.475	-0.903468	0.000199686	0.00149917	2.40595	TRUE	TRUE	TRUE	FALSE
Cggbp1	730.934	-1.63213	1.1e-26	1.87e-24	7.69388	TRUE	TRUE	TRUE	TRUE
Cgn	254.329	0.767955	6.66e-05	0.000583534	4.35658	TRUE	TRUE	TRUE	FALSE
Cgnl1	267.385	0.972838	9.34e-08	1.72e-06	6.64445	TRUE	TRUE	TRUE	FALSE
Cgrrf1	215.325	-0.456923	0.0431379	0.120753	1.92241	TRUE	TRUE	TRUE	FALSE
Chac2	8.16176	1.82996	0.0437999	0.12197	3.22153	TRUE	TRUE	FALSE	FALSE
Chaf1a	1010.04	1.43945	1.02e-21	1.3e-19	13.9797	TRUE	FALSE	TRUE	FALSE
Chchd10	79.4544	1.61238	1.49e-06	2.09e-05	4.40377	FALSE	TRUE	FALSE	FALSE
Chchd3	700.401	-0.642764	0.0120892	0.0445379	1.48488	TRUE	FALSE	TRUE	FALSE
Chchd7	115.747	0.881602	0.000967319	0.00568584	3.16662	TRUE	TRUE	FALSE	FALSE
Chd3	451.164	1.32594	1.05e-14	6.31e-13	8.46836	TRUE	TRUE	TRUE	FALSE
Rnf227	56.2284	-0.667428	0.018035	0.06125	3.88434	TRUE	FALSE	FALSE	FALSE
Chd4	1820.53	1.13582	2.1e-11	7.6e-10	6.26565	TRUE	TRUE	TRUE	FALSE
Get1	3150.14	0.930066	9.71e-11	3.14e-09	5.35593	TRUE	FALSE	TRUE	FALSE
Chd8	544.732	0.35247	0.009586	0.0369647	4.11449	FALSE	FALSE	TRUE	FALSE
Chek1	79.3727	-0.674785	0.0429373	0.120284	1.16325	TRUE	TRUE	TRUE	TRUE
Cherp	479.35	1.00442	1.12e-07	2.03e-06	4.75105	TRUE	FALSE	TRUE	FALSE
Chga	36.3437	2.9906	6.25e-08	1.2e-06	12.2008	TRUE	TRUE	TRUE	TRUE
Chgb	45.818	0.998364	0.021909	0.0713165	2.00669	TRUE	TRUE	FALSE	FALSE
Chkb	4.57105	4.18955	0.00867407	0.0341554	1.99353	FALSE	FALSE	TRUE	FALSE
Chl1	3959.65	-0.39934	0.0218298	0.0711457	1.63936	TRUE	TRUE	TRUE	FALSE
Chm	33.8694	-0.818296	0.0471128	0.128548	1.1245	TRUE	TRUE	TRUE	FALSE
Chml	137.442	-0.456126	0.0406856	0.115339	1.83316	FALSE	TRUE	TRUE	TRUE
Chmp2a	317.895	0.373052	0.0188186	0.0632638	3.54186	FALSE	TRUE	FALSE	FALSE
Chmp3	230.907	-0.79778	0.000476615	0.00314373	2.30511	TRUE	TRUE	TRUE	FALSE
Chmp4b	309.255	1.76225	1.03e-14	6.23e-13	4.87289	TRUE	TRUE	FALSE	FALSE
Chmp6	138.742	0.650724	0.0013017	0.00732798	11.1806	TRUE	TRUE	TRUE	FALSE
Chmp7	88.3052	0.802507	0.00234422	0.0118451	3.91869	TRUE	TRUE	TRUE	FALSE
Chordc1	124.594	-0.757622	0.00129014	0.00727191	2.76886	TRUE	TRUE	TRUE	TRUE
Chpt1	499.922	-0.65255	3.63e-05	0.000341278	5.63972	TRUE	TRUE	TRUE	FALSE
Chrac1	618.335	-0.562411	0.00413873	0.0188228	2.28187	TRUE	TRUE	TRUE	FALSE
Chrdl1	31.3591	1.09362	0.0103986	0.0394718	3.34757	TRUE	TRUE	TRUE	TRUE
Chrna1	66.5905	1.50636	2.85e-06	3.7e-05	6.89015	TRUE	TRUE	TRUE	FALSE
Chrna10	5.35541	-2.55374	0.00343854	0.0161916	2.47696	TRUE	TRUE	TRUE	FALSE
Chrna4	8.38671	3.01966	0.00885954	0.0347433	4.73217	TRUE	TRUE	TRUE	FALSE
Chst7	301.826	-8.49216	1.79e-77	9.63e-75	5.51944	TRUE	TRUE	TRUE	FALSE
Chsy1	54.0454	-0.786546	0.0161659	0.0563707	2.15801	TRUE	TRUE	TRUE	FALSE
Chtf18	76.5397	1.13118	7.15e-05	0.000622277	6.22058	FALSE	TRUE	TRUE	FALSE
Chtf8	196.939	-0.515285	0.0317331	0.0954429	1.42213	TRUE	TRUE	TRUE	FALSE
Cic	488.827	0.986982	3.31e-06	4.22e-05	3.34485	TRUE	TRUE	TRUE	FALSE
Cir1	126.962	-0.694671	0.000882462	0.00527713	4.36311	FALSE	TRUE	TRUE	FALSE
Cirbp	289.551	0.440224	0.0419289	0.118111	1.78688	TRUE	TRUE	TRUE	FALSE
Cit	478.032	1.0275	6.72e-09	1.6e-07	5.22997	TRUE	TRUE	TRUE	FALSE
Cited1	135.443	-0.614101	0.0405182	0.114989	1.155	FALSE	FALSE	FALSE	FALSE
Cited4	19.9232	1.10767	0.0468872	0.128239	2.09004	TRUE	TRUE	FALSE	FALSE
Ciz1	526.052	1.25882	6.07e-09	1.46e-07	5.89074	TRUE	FALSE	FALSE	FALSE
CK137956	748.28	1.03845	2.01e-09	5.27e-08	5.7582	FALSE	TRUE	TRUE	FALSE
Ckap4	550.657	0.698818	5.16e-05	0.00046467	3.98764	TRUE	TRUE	TRUE	TRUE
Cmtm2a	268.536	-1.17793	4.06e-07	6.43e-06	3.91632	TRUE	FALSE	TRUE	FALSE
Cks2	182.515	-2.04712	1.7e-12	7.14e-11	3.73475	TRUE	FALSE	FALSE	FALSE
Clasrp	186.9	1.39301	2.67e-07	4.45e-06	4.92821	FALSE	FALSE	FALSE	FALSE
Clcn3	442.995	-0.825832	5.93e-09	1.43e-07	6.66283	TRUE	TRUE	TRUE	FALSE
Clcn4	245.62	-0.611465	0.00180383	0.00955917	3.78648	TRUE	TRUE	TRUE	FALSE
Clcnkb	11.3281	-4.70879	4.9e-09	1.2e-07	3.08383	TRUE	TRUE	TRUE	FALSE
Cldn15	10.3125	-2.81896	0.00010215	0.000848974	8.66541	TRUE	TRUE	TRUE	FALSE
Cldn3	152.17	1.11209	6.42e-06	7.49e-05	4.10552	TRUE	TRUE	TRUE	FALSE
Cldn34a	21.3739	-1.84112	0.00015782	0.00123409	2.28902	FALSE	FALSE	FALSE	FALSE
Cldn34b1	33.237	-1.73855	2.32e-06	3.11e-05	4.3148	FALSE	FALSE	FALSE	FALSE
Cldn34b3	34.7207	-1.91762	1.22e-05	0.000131092	1.90143	FALSE	FALSE	FALSE	FALSE
Cldn34b4	87.0706	-1.91817	2.06e-06	2.8e-05	2.13092	FALSE	FALSE	FALSE	FALSE
Cldn34c1	26.0753	-6.74913	1.22e-16	9.43e-15	61.0123	FALSE	FALSE	TRUE	TRUE
Cldn34c4	74.5084	-1.27607	0.00399074	0.0182625	1.30203	FALSE	FALSE	FALSE	FALSE
Cldn34d	58.8016	-2.61569	1.43e-13	7.09e-12	3.05872	FALSE	FALSE	FALSE	FALSE
Cldn5	13.4662	1.67422	0.0158102	0.0553948	3.64256	TRUE	TRUE	TRUE	FALSE
Clec11a	20.1247	-0.994541	0.0280035	0.0864646	2.07064	FALSE	TRUE	TRUE	FALSE
Clec12b	55.494	-1.09713	0.000241764	0.00175864	2.54506	TRUE	FALSE	TRUE	FALSE
Clec16a	420.603	0.75837	1.22e-06	1.73e-05	6.54474	TRUE	TRUE	TRUE	FALSE
Clec2d	26.3639	-0.909805	0.0241984	0.0771703	2.60346	TRUE	TRUE	TRUE	FALSE
Clec4g	25.2008	-1.09996	0.00521382	0.0227541	9.1918	TRUE	TRUE	FALSE	FALSE
Clgn	3619.35	0.642045	5.71e-06	6.78e-05	3.80336	TRUE	TRUE	TRUE	FALSE
Aunip	246.309	-0.945106	0.000203662	0.0015244	2.08702	TRUE	TRUE	FALSE	FALSE
Clint1	312.011	0.657613	1.27e-05	0.000135671	15.0134	TRUE	TRUE	TRUE	TRUE
Clip1	1384.28	0.818564	3.32e-09	8.34e-08	5.51297	TRUE	TRUE	TRUE	FALSE
Clip3	184.415	-2.224	5.24e-19	5.04e-17	7.28843	TRUE	TRUE	TRUE	TRUE
Clip4	2948.47	0.487882	5.51e-05	0.00049291	4.81088	TRUE	TRUE	TRUE	FALSE
Clk4	395.873	-0.617335	0.0304287	0.0923152	1.15578	TRUE	TRUE	TRUE	FALSE
Clmn	2192.58	1.37439	3.59e-19	3.56e-17	10.0253	TRUE	TRUE	TRUE	TRUE
Cln5	44.8324	-1.16958	0.000374134	0.0025536	3.6403	TRUE	TRUE	TRUE	TRUE
Cln6	251.919	1.33316	1.09e-10	3.48e-09	8.02496	TRUE	TRUE	TRUE	TRUE
Clock	413.318	-0.849507	2.8e-05	0.000271446	2.47889	TRUE	TRUE	TRUE	TRUE
Clp1	214.308	-0.75608	8.07e-05	0.000690575	4.60523	TRUE	TRUE	TRUE	TRUE
Clptm1	380.143	0.603308	0.000303858	0.0021379	4.13551	TRUE	TRUE	TRUE	FALSE
Clptm1l	533.331	0.304941	0.0291378	0.0891824	2.84626	TRUE	TRUE	TRUE	FALSE
Clrn1	8.10953	-1.84607	0.0116673	0.0432104	4.9214	TRUE	TRUE	TRUE	FALSE
Clstn1	159.114	1.81011	2.47e-12	1.01e-10	5.99862	TRUE	TRUE	TRUE	TRUE
Clstn2	149.824	-5.80903	5.21e-80	2.88e-77	9.03255	TRUE	TRUE	TRUE	FALSE
Clstn3	31.1223	1.17016	0.00804249	0.0321066	3.16885	TRUE	TRUE	TRUE	FALSE
Clta	50.5701	1.19718	0.000549193	0.00354557	5.11937	TRUE	TRUE	FALSE	TRUE
Cltb	46.3054	0.871446	0.00929744	0.036073	6.32892	TRUE	TRUE	TRUE	FALSE
Clu	3711.42	0.539044	1.54e-06	2.15e-05	5.63552	FALSE	FALSE	FALSE	FALSE
Cluh	484.06	1.1663	3.49e-13	1.64e-11	8.95474	TRUE	TRUE	TRUE	TRUE
Cmas	105.879	0.700351	0.00434929	0.0196531	4.07673	TRUE	FALSE	TRUE	FALSE
Cmip	88.2668	0.965095	0.000740144	0.004576	3.63898	TRUE	TRUE	TRUE	FALSE
Cmklr1	151.009	1.10921	1.64e-06	2.28e-05	5.49181	TRUE	TRUE	TRUE	FALSE
Cmpk2	25.3893	-0.964815	0.0280634	0.0866084	2.28719	TRUE	TRUE	TRUE	FALSE
Cmtm1	181.96	-0.726922	0.0044124	0.0198498	2.14083	FALSE	TRUE	FALSE	FALSE
Cmtm2a	3700.44	-1.01293	3.12e-10	9.42e-09	5.53136	TRUE	FALSE	TRUE	FALSE
Cmtm6	220.077	-0.586566	0.0118526	0.0437899	1.86804	TRUE	TRUE	TRUE	FALSE
Cnbp	796.417	-0.580631	3.1e-05	0.000297616	3.82693	TRUE	TRUE	TRUE	FALSE
Cnep1r1	137.584	-0.631409	0.00228156	0.0116023	4.69531	TRUE	TRUE	TRUE	FALSE
Cnga3	30.9469	-0.93096	0.0221241	0.0718739	1.66305	TRUE	TRUE	TRUE	FALSE
Cngb3	121.964	-1.14521	0.0117598	0.0435087	0.979226	TRUE	TRUE	TRUE	TRUE
Cnnm3	46.5016	0.879954	0.0177988	0.0606169	2.49783	TRUE	TRUE	TRUE	FALSE
Cnnm4	210.88	0.806906	7.56e-05	0.000652677	4.28533	TRUE	TRUE	TRUE	TRUE
Cnot1	4730.15	-0.265094	0.032723	0.0976182	2.13615	TRUE	TRUE	TRUE	TRUE
Cnot11	114.063	0.771814	0.000671381	0.00421078	6.74989	TRUE	TRUE	TRUE	FALSE
Cnot2	401.42	-0.413721	0.00755693	0.030622	2.50132	TRUE	TRUE	TRUE	TRUE
Cnot3	94.3245	1.52172	0.000178009	0.00136277	3.20822	TRUE	FALSE	FALSE	FALSE
Cnot6	533.733	-0.364137	0.0125065	0.0457335	2.64252	TRUE	TRUE	TRUE	TRUE
Cnot6l	265.745	-0.500632	0.0147315	0.0523186	1.96769	TRUE	TRUE	TRUE	TRUE
Cnot7	463.407	-0.424279	0.0130914	0.0475959	2.1373	TRUE	FALSE	TRUE	FALSE
Cnppd1	241.816	0.588655	0.000735284	0.00455213	4.75001	TRUE	TRUE	TRUE	FALSE
Cntnap5b	523.56	-0.915385	0.000381906	0.00259887	2.20596	TRUE	TRUE	TRUE	TRUE
Cntnap5c	27.3028	-0.819647	0.0380548	0.109774	1.95874	FALSE	TRUE	TRUE	FALSE
Cntrl	836.478	0.424629	0.00580151	0.0248285	2.67748	TRUE	TRUE	TRUE	FALSE
Cntrob	156.044	0.764635	0.000642995	0.00405364	3.79194	TRUE	TRUE	FALSE	FALSE
Cobll1	60.6132	1.72597	2.46e-05	0.000242483	2.8822	TRUE	TRUE	TRUE	FALSE
Cog1	470.099	0.545635	0.0137781	0.0495495	2.08015	TRUE	TRUE	FALSE	FALSE
Cog5	199.499	-0.666185	0.00136802	0.00763071	2.21972	TRUE	TRUE	FALSE	TRUE
Cog6	1475.79	-0.417448	0.00847755	0.0334827	2.43377	TRUE	TRUE	TRUE	TRUE
Col10a1	12.3338	-3.78603	4.91e-06	5.95e-05	1.65721	TRUE	TRUE	TRUE	FALSE
Col18a1	85.6491	1.64719	1.52e-05	0.000158535	3.86813	TRUE	TRUE	TRUE	FALSE
Col19a1	23.1598	1.4053	0.00495856	0.0218284	7.18228	TRUE	TRUE	TRUE	TRUE
Col1a1	86.1622	2.09509	0.000308611	0.002163	1.42727	TRUE	TRUE	TRUE	TRUE
Col25a1	27.358	-2.6759	2.32e-10	7.1e-09	3.56927	TRUE	TRUE	TRUE	FALSE
Col26a1	77.9719	-0.651671	0.0082585	0.0328021	4.05946	TRUE	TRUE	TRUE	FALSE
Col2a1	174.514	0.591362	0.012194	0.0448242	2.25681	TRUE	TRUE	TRUE	FALSE
Col4a1	123.907	1.20306	0.000160424	0.00125178	2.48486	TRUE	TRUE	TRUE	FALSE
Col4a2	117.995	1.24861	0.000218503	0.00161454	2.42077	TRUE	TRUE	TRUE	FALSE
Col6a1	47.8183	1.84807	0.000913974	0.00542585	2.41486	TRUE	TRUE	TRUE	FALSE
Col6a2	30.4949	1.34079	0.023514	0.0753034	1.4872	TRUE	TRUE	TRUE	FALSE
Col6a6	66.7074	-3.49116	6.71e-29	1.29e-26	4.88099	FALSE	FALSE	FALSE	FALSE
Col7a1	23.7784	-1.44057	0.00351657	0.0164735	2.55715	TRUE	TRUE	TRUE	FALSE
Col8a1	17.2962	-1.09983	0.021627	0.0705856	2.66597	TRUE	TRUE	TRUE	FALSE
Colq	10.1376	-1.35143	0.0276818	0.0857178	4.32762	FALSE	TRUE	TRUE	FALSE
Commd2	33.446	-1.52912	7.68e-06	8.73e-05	7.82468	TRUE	TRUE	TRUE	FALSE
Commd3	264.751	-0.494957	0.0156888	0.0550647	1.79898	TRUE	FALSE	FALSE	FALSE
Commd4	33.831	-0.802486	0.0248658	0.0788167	1.96772	FALSE	FALSE	TRUE	FALSE
Commd8	68.2766	-0.788046	0.00208779	0.01077	3.57088	TRUE	TRUE	TRUE	TRUE
Comp	803.808	0.935976	4.43e-14	2.39e-12	15.388	FALSE	FALSE	FALSE	FALSE
Comt	21.518	0.963331	0.0482104	0.130741	3.62003	TRUE	TRUE	TRUE	FALSE
Copb2	490.45	-0.348245	0.00806023	0.0321335	4.52076	TRUE	TRUE	FALSE	FALSE
Cope	121.07	0.910911	4.5e-05	0.000413479	9.14388	TRUE	TRUE	FALSE	FALSE
Cops3	584.382	-0.635658	0.00115246	0.00661014	2.25882	FALSE	FALSE	FALSE	FALSE
Cops5	872.172	-0.632425	0.0193367	0.064731	1.20597	TRUE	TRUE	TRUE	FALSE
Coq10b	207.647	-0.769266	0.00124561	0.00704345	2.04283	TRUE	TRUE	TRUE	TRUE
Corin	282.629	-0.444677	0.00888994	0.0348401	2.73631	TRUE	TRUE	FALSE	TRUE
Coro2a	768.051	0.876434	9.64e-08	1.77e-06	5.35912	TRUE	TRUE	TRUE	FALSE
Cotl1	42.7331	1.32845	0.000412593	0.00277663	6.46092	TRUE	TRUE	TRUE	FALSE
Cox16	26.0357	-2.61821	6.51e-09	1.56e-07	2.86231	TRUE	TRUE	TRUE	FALSE
Cox18	27.4617	1.36549	0.00510826	0.0223683	3.22296	TRUE	TRUE	FALSE	FALSE
Cox4i1	570.585	0.53769	0.00779002	0.0313369	2.11506	FALSE	FALSE	TRUE	FALSE
Cox5a	370.279	0.668719	0.000105603	0.000873294	4.13848	FALSE	TRUE	TRUE	FALSE
Cox6a1	236.648	0.930278	7.34e-07	1.1e-05	6.32349	FALSE	TRUE	FALSE	FALSE
Cox6b1	69.1499	0.613211	0.0435556	0.12168	2.08745	TRUE	TRUE	TRUE	FALSE
Cox6b2	711.449	0.565853	0.000251892	0.00181926	3.69293	TRUE	TRUE	FALSE	FALSE
Cox6c	489.104	-1.4695	1.25e-07	2.24e-06	2.19358	TRUE	TRUE	FALSE	FALSE
Cox7a2	707.695	-1.1712	4.75e-05	0.000433854	1.85193	TRUE	TRUE	FALSE	TRUE
Cox7a2l	126.561	-1.48512	1.27e-09	3.43e-08	3.46719	TRUE	TRUE	TRUE	FALSE
Cox7b	20.4807	-1.26997	0.0255808	0.0805235	1.14222	TRUE	TRUE	TRUE	FALSE
Cox7b2	602.7	-1.04857	0.00116776	0.00668534	1.52588	FALSE	FALSE	FALSE	FALSE
Cox7c	130.84	-3.11322	1.43e-21	1.79e-19	3.02372	TRUE	TRUE	FALSE	FALSE
Cox8a	71.6471	-0.902621	0.00364234	0.0169453	2.73395	FALSE	FALSE	TRUE	FALSE
Cpa6	38.9227	-1.36429	0.000199436	0.0014979	2.38101	TRUE	TRUE	FALSE	FALSE
Cpe	290.229	0.918979	3.46e-08	7.04e-07	9.4154	TRUE	TRUE	TRUE	FALSE
Cpeb2	3091.88	0.721083	1.88e-07	3.23e-06	4.80738	TRUE	TRUE	TRUE	FALSE
Cpeb3	564.254	0.808759	7.96e-06	9e-05	4.36759	TRUE	TRUE	TRUE	FALSE
Cplx1	6.99572	3.73664	0.00441871	0.0198733	6.18432	TRUE	TRUE	TRUE	TRUE
Cplx2	4.01736	4.0082	0.00632062	0.0265942	3.35274	TRUE	TRUE	TRUE	FALSE
Cpne1	102.154	0.81114	0.00156192	0.00849528	3.85445	TRUE	TRUE	TRUE	FALSE
Cpne8	24.2132	-0.987882	0.0165884	0.0574924	2.24449	TRUE	TRUE	TRUE	TRUE
Cpne9	18.7132	-1.674	0.000852023	0.00513235	2.62172	TRUE	TRUE	TRUE	FALSE
Cpped1	44.9877	0.799596	0.0185601	0.0625583	4.16886	TRUE	TRUE	TRUE	FALSE
Cpq	93.4019	-0.625882	0.0194546	0.0649948	1.60659	TRUE	FALSE	FALSE	FALSE
Cpsf1	429.012	0.81864	5.36e-06	6.42e-05	4.59976	FALSE	FALSE	FALSE	FALSE
Cpsf3	226.323	0.458639	0.00723927	0.0295844	4.91408	TRUE	TRUE	TRUE	FALSE
Ints11	94.939	0.892237	0.00144782	0.00799278	3.33858	TRUE	TRUE	TRUE	FALSE
Cpsf4	71.08	0.921701	0.00271069	0.0133638	3.245	TRUE	TRUE	TRUE	FALSE
Cpsf4l	135.804	-0.518013	0.0295725	0.090316	1.66642	FALSE	FALSE	TRUE	FALSE
Cpt1a	217.046	0.47972	0.00977205	0.0375552	3.4476	TRUE	TRUE	TRUE	TRUE
Cpt1b	32.0911	1.46634	0.00237988	0.0119758	3.18158	TRUE	FALSE	TRUE	FALSE
Cpxcr1	238.584	-1.44816	0.000457992	0.0030451	1.3593	TRUE	TRUE	FALSE	FALSE
Cr2	18.0369	-1.9447	0.00785818	0.0315208	1.41514	TRUE	TRUE	TRUE	FALSE
Cramp1	501.561	0.429518	0.00630631	0.0265544	3.03163	TRUE	FALSE	FALSE	FALSE
Crat	3243.35	0.807618	3.31e-11	1.15e-09	8.84563	TRUE	TRUE	TRUE	FALSE
Crb1	45.807	-1.18947	0.00153682	0.00838485	1.64339	TRUE	TRUE	TRUE	FALSE
Crbn	441.626	-0.842568	0.00145959	0.00804314	1.73193	TRUE	TRUE	TRUE	TRUE
Creb1	163.155	-0.745082	0.000914168	0.00542585	2.88773	TRUE	TRUE	TRUE	TRUE
Creb3l1	45.1395	2.25857	3.05e-06	3.92e-05	4.11229	TRUE	TRUE	TRUE	TRUE
Creb3l2	20.5774	1.17346	0.0466349	0.127849	1.8259	TRUE	TRUE	TRUE	FALSE
Creb3l3	8.26224	-2.66739	0.000182002	0.00138752	3.51601	TRUE	FALSE	FALSE	FALSE
Creb3l4	1597.42	0.525319	0.00118333	0.00675325	2.62742	TRUE	FALSE	TRUE	FALSE
Creb5	3.82036	-2.59558	0.0221376	0.071905	1.34266	TRUE	TRUE	TRUE	TRUE
Crebbp	574.215	1.16502	1.25e-08	2.81e-07	4.10099	FALSE	TRUE	TRUE	FALSE
Crebrf	1224.54	-0.852385	3.26e-07	5.32e-06	3.62955	TRUE	TRUE	TRUE	TRUE
Crebzf	388.983	-2.13522	7.95e-30	1.65e-27	6.32012	TRUE	TRUE	TRUE	TRUE
Creld2	724.235	1.11294	9.49e-07	1.4e-05	4.48631	TRUE	FALSE	TRUE	FALSE
Crem	1081.96	-0.427987	0.0250681	0.0792853	1.5392	TRUE	TRUE	TRUE	TRUE
Crip2	243.48	1.18371	4.58e-09	1.13e-07	5.90238	TRUE	TRUE	TRUE	FALSE
Crisp1	3.42451	-2.86811	0.024361	0.077538	0.912476	TRUE	TRUE	FALSE	FALSE
Crisp2	11745.9	-0.697928	0.0399093	0.113721	0.950647	TRUE	FALSE	TRUE	FALSE
Crisp4	2.01544	-3.27885	0.0337882	0.100255	2.76978	FALSE	FALSE	TRUE	FALSE
Crlf1	137.168	-0.488612	0.0212464	0.0696297	2.25852	TRUE	FALSE	TRUE	FALSE
Crlf2	82.8754	1.19536	0.000431541	0.00288712	3.00907	TRUE	TRUE	FALSE	TRUE
Crlf3	27.2	0.899716	0.034164	0.101107	13.2044	TRUE	TRUE	TRUE	FALSE
Crls1	464.808	-0.509734	0.0197046	0.0656685	1.42615	TRUE	TRUE	TRUE	FALSE
Crot	79.4994	-0.836343	0.00667357	0.0277069	1.62374	TRUE	TRUE	TRUE	FALSE
Crp	5.37911	-2.30322	0.0226204	0.0730959	1.26336	TRUE	TRUE	TRUE	TRUE
Crtc1	66.6315	1.29558	0.000198911	0.00149519	3.47321	TRUE	TRUE	TRUE	FALSE
Crtc2	83.6645	0.70472	0.0145205	0.0516698	2.56985	FALSE	FALSE	FALSE	FALSE
Crtc3	82.0189	0.766302	0.018432	0.0622024	2.01382	TRUE	TRUE	TRUE	FALSE
Cry1	239.321	0.819435	6.48e-06	7.54e-05	6.54862	TRUE	FALSE	TRUE	FALSE
Cryab	3.96117	2.84451	0.0438234	0.121998	3.4608	FALSE	FALSE	FALSE	FALSE
Crybg3	1412.92	-0.505147	2.94e-05	0.000284009	4.37804	TRUE	TRUE	TRUE	FALSE
Crym	1.9383	-3.89291	0.0253322	0.0799201	1.50458	TRUE	TRUE	TRUE	TRUE
Cs	387.445	0.460671	0.00712824	0.0292462	2.8571	TRUE	TRUE	TRUE	TRUE
Csde1	3758	-0.885664	3.41e-10	1.02e-08	4.78	TRUE	FALSE	TRUE	TRUE
Cse1l	719.693	-0.797027	3.55e-06	4.49e-05	2.93453	TRUE	TRUE	TRUE	FALSE
Csf2ra	16.6723	2.6846	0.000709489	0.00441339	3.6861	TRUE	TRUE	FALSE	TRUE
Csmd2	36.5293	-0.751387	0.0377228	0.109005	2.1224	TRUE	TRUE	TRUE	TRUE
Csmd3	56.4062	-1.41169	0.00282263	0.0138067	1.14902	TRUE	TRUE	FALSE	FALSE
Csn1s2a	6.42268	-2.84022	0.00174072	0.00931393	1.31663	TRUE	TRUE	TRUE	FALSE
Csn1s2b	8.52216	-3.09142	1.32e-05	0.000140453	6.05134	TRUE	FALSE	FALSE	FALSE
Csnk1a1	976.381	0.827336	1.05e-07	1.92e-06	5.90796	TRUE	TRUE	TRUE	TRUE
Csnk1d	834.423	1.10809	7.63e-16	5.42e-14	10.5238	TRUE	TRUE	TRUE	TRUE
Csnk1g1	349.723	-0.33779	0.0138347	0.0496847	8.99923	TRUE	TRUE	TRUE	TRUE
Csnk1g2	2805.53	0.882178	3.47e-14	1.91e-12	11.1937	TRUE	TRUE	FALSE	FALSE
Csnk2a2	506.257	0.932202	1.03e-10	3.33e-09	10.3963	TRUE	FALSE	TRUE	FALSE
Csnk2b	3268.28	0.482404	0.00693523	0.0285722	2.22484	TRUE	FALSE	TRUE	FALSE
Cspg5	701.437	-7.14271	2.26e-200	3.44e-197	8.66965	TRUE	FALSE	TRUE	FALSE
Csrnp1	251.029	0.541459	0.0138704	0.0497735	2.12078	TRUE	TRUE	TRUE	FALSE
Csrp1	49.4015	1.38587	0.000146763	0.00116308	4.79359	TRUE	TRUE	TRUE	FALSE
Kat14	64.0737	1.03678	0.0427696	0.119885	1.52775	TRUE	FALSE	TRUE	FALSE
Cst6	3.1973	-3.03618	0.0445342	0.12355	1.20796	TRUE	TRUE	TRUE	FALSE
Cst9	447.723	-1.51441	2.28e-05	0.000226502	1.56753	TRUE	TRUE	FALSE	FALSE
Cstf2	308.906	0.370754	0.017875	0.0608195	3.98446	TRUE	TRUE	TRUE	FALSE
Cstf2t	367.027	0.463352	0.00806444	0.0321378	2.75233	TRUE	TRUE	FALSE	FALSE
Ctag2	262.153	-1.1094	0.000251435	0.00181858	1.76847	TRUE	TRUE	FALSE	FALSE
Mia2	233.066	0.53389	0.013559	0.0488676	2.14412	FALSE	FALSE	TRUE	FALSE
Ctbp1	86.853	0.783957	0.0330262	0.0983619	1.64419	TRUE	TRUE	FALSE	TRUE
Ctbs	66.3304	-1.1888	2.72e-05	0.000265078	4.22953	TRUE	TRUE	TRUE	TRUE
Ctc1	188.78	0.696523	0.000349497	0.00240161	4.8095	FALSE	TRUE	TRUE	FALSE
Ctcflos	10.2203	-1.4588	0.0371156	0.107677	1.45523	TRUE	FALSE	FALSE	FALSE
Ctdspl2	422.639	-1.07504	5.02e-10	1.46e-08	4.05166	TRUE	TRUE	TRUE	TRUE
Ccn2	117.153	1.04517	0.000275538	0.00197055	2.90631	TRUE	FALSE	TRUE	FALSE
Ctnna1	178.767	0.733112	0.000698663	0.00435495	3.60969	TRUE	TRUE	TRUE	FALSE
Ctnna2	132.356	-1.03533	2.02e-05	0.000204035	2.80924	TRUE	TRUE	TRUE	TRUE
Ctnnb1	525.947	0.54155	0.00176417	0.00940976	2.99317	TRUE	TRUE	TRUE	FALSE
Ctnnd2	59.1645	-0.677999	0.0308797	0.0934172	1.74757	TRUE	FALSE	TRUE	FALSE
Ctns	95.685	-0.686752	0.00638966	0.026821	2.13739	TRUE	TRUE	TRUE	FALSE
Ctr9	571.36	0.567968	0.000631146	0.00398721	3.34161	TRUE	TRUE	TRUE	FALSE
Ctsa	42.407	0.864264	0.0160942	0.0562064	3.47812	TRUE	TRUE	TRUE	TRUE
Ctsd	272.578	0.428571	0.00917449	0.0356985	4.34057	TRUE	FALSE	FALSE	FALSE
Ctso	72.8352	-0.694031	0.00936855	0.0362641	4.04121	TRUE	TRUE	TRUE	TRUE
Cttnbp2	21.8166	-0.87777	0.0379698	0.109598	3.5247	TRUE	TRUE	TRUE	FALSE
Cttnbp2nl	247.571	0.826939	0.000344284	0.00236936	3.11405	TRUE	TRUE	TRUE	TRUE
Ctu2	62.2168	0.875789	0.00524724	0.0228839	3.27361	TRUE	TRUE	TRUE	FALSE
Ctxn1	70.1272	0.820374	0.00582144	0.0248939	2.97872	TRUE	TRUE	TRUE	FALSE
Cuedc1	4.61797	4.20738	0.0026761	0.013229	4.82061	TRUE	TRUE	TRUE	FALSE
Cuedc2	49.4147	0.803477	0.0169349	0.058361	3.12171	FALSE	TRUE	TRUE	FALSE
Cul3	2993.53	0.668524	0.0083292	0.0330183	1.92396	TRUE	TRUE	TRUE	TRUE
Cul4a	595.643	0.658853	1.75e-05	0.000179985	5.10726	TRUE	TRUE	TRUE	FALSE
Cul7	55.0284	1.46524	0.00311065	0.0149487	2.21885	TRUE	FALSE	TRUE	FALSE
Cul9	241.618	0.968718	0.00020764	0.00154869	2.77726	TRUE	TRUE	FALSE	FALSE
Cutc	132.18	-0.536491	0.0378342	0.10931	1.55518	FALSE	TRUE	TRUE	FALSE
Cux1	1134.11	0.955985	1.22e-15	8.37e-14	13.12	TRUE	TRUE	TRUE	TRUE
Cuzd1	21.7737	-1.30579	0.00217588	0.0111644	4.79014	FALSE	FALSE	FALSE	FALSE
Cwh43	1.89746	-3.92681	0.0242227	0.0772343	3.53256	TRUE	TRUE	TRUE	FALSE
Cx3cl1	12.6153	2.18912	0.00488944	0.0216018	5.55474	TRUE	TRUE	TRUE	TRUE
Cx3cr1	18.3083	1.78766	0.0232466	0.0746566	1.89024	TRUE	TRUE	TRUE	FALSE
Cxcl1	3.271	-2.76007	0.0304683	0.092387	1.18172	TRUE	FALSE	TRUE	FALSE
Cxcl10	7.3325	-3.47834	2.03e-05	0.00020459	4.1831	TRUE	TRUE	TRUE	FALSE
Cxcl11	8.76129	-3.82714	0.000151626	0.00119487	1.50759	TRUE	TRUE	FALSE	FALSE
Cxcl12	66.839	1.03828	0.00120368	0.006848	3.53741	TRUE	TRUE	TRUE	TRUE
Cxcr6	9.71829	-2.21478	0.00117181	0.00670429	1.99797	TRUE	TRUE	TRUE	FALSE
Cxxc1	254.575	0.833839	3.98e-06	4.96e-05	6.08979	FALSE	TRUE	FALSE	FALSE
Cxxc4	79.7208	-6.06169	1.72e-33	4.24e-31	5.88592	TRUE	TRUE	TRUE	TRUE
Cyb561d2	31.288	-0.705093	0.0497437	0.134063	3.21722	TRUE	FALSE	TRUE	FALSE
Cyb5r1	71.7668	1.0588	0.000580659	0.00371846	3.83525	TRUE	TRUE	TRUE	FALSE
Cyb5r3	174.939	0.902548	0.000710167	0.0044161	2.72993	TRUE	TRUE	FALSE	TRUE
Cyb5r4	248.674	-1.77219	2.37e-12	9.73e-11	10.0435	TRUE	TRUE	TRUE	FALSE
Cycs	54.0513	-2.44385	1.93e-12	8.02e-11	5.60523	TRUE	TRUE	TRUE	TRUE
Cyhr1	715.853	0.732263	5.9e-07	9.05e-06	5.55588	TRUE	TRUE	TRUE	FALSE
Cylc1	657.032	-0.839363	0.0304938	0.0924488	1.10177	FALSE	TRUE	FALSE	FALSE
Cylc2	1106.19	-0.703562	0.0142996	0.0510529	1.24878	FALSE	FALSE	TRUE	FALSE
Cyld	191.05	-0.593678	0.00142609	0.00790389	5.21855	TRUE	TRUE	TRUE	TRUE
Cyp11b1	11.0355	-2.68038	7.33e-05	0.000635371	2.35804	TRUE	TRUE	TRUE	FALSE
Cyp11b2	7.61193	-2.90647	0.000110212	0.000905257	4.44865	FALSE	FALSE	TRUE	FALSE
Cyp17a1	1633.22	0.733101	0.0297408	0.0907084	1.83453	FALSE	FALSE	FALSE	FALSE
Cyp1b1	120.94	-0.521333	0.0183489	0.0620274	2.56459	TRUE	TRUE	TRUE	TRUE
Cyp24a1	9.67153	-2.18002	0.00316687	0.0151583	1.34255	TRUE	TRUE	TRUE	FALSE
Cyp26b1	156.176	1.15937	2.78e-07	4.6e-06	6.18737	TRUE	TRUE	TRUE	TRUE
Cyp2a12	84.6709	-0.765125	0.0181583	0.0615198	1.60793	FALSE	TRUE	FALSE	FALSE
Cyp2c29	10.8944	2.37497	0.015355	0.0541117	2.17279	TRUE	TRUE	TRUE	FALSE
Cyp2c23	10.5832	-1.41042	0.0295094	0.0901835	2.98475	TRUE	FALSE	TRUE	FALSE
Cyp2c55	36.9812	4.72323	1.59e-07	2.8e-06	5.62824	TRUE	TRUE	TRUE	FALSE
Cyp2c65	6.51623	-2.51979	0.00310699	0.0149487	2.41288	FALSE	TRUE	FALSE	FALSE
Cyp2d26	86.312	0.618504	0.0173194	0.059419	3.85345	FALSE	FALSE	FALSE	FALSE
Cyp2j13	1.87075	-4.80381	0.0134392	0.048537	1.56546	TRUE	TRUE	TRUE	FALSE
Cyp39a1	31.0104	0.925209	0.0397421	0.113351	2.06832	TRUE	TRUE	TRUE	FALSE
Cyp4f39	130.366	0.760596	0.000606929	0.00385692	5.67761	TRUE	TRUE	TRUE	FALSE
Cypt1	27.1069	3.80203	0.000109122	0.000897512	1.70498	FALSE	FALSE	TRUE	FALSE
Cypt12	1403.93	-0.823603	0.0180753	0.0612966	1.04531	FALSE	TRUE	TRUE	FALSE
Cypt15	49.4617	-1.58081	4.43e-05	0.000408141	2.12765	TRUE	TRUE	TRUE	FALSE
Cypt2	341.566	-1.32537	3.85e-05	0.000359565	1.8982	FALSE	FALSE	TRUE	FALSE
Cypt3	487.037	-1.50158	1.26e-08	2.82e-07	3.0938	TRUE	FALSE	TRUE	FALSE
Cypt4	150.546	1.15729	0.0249993	0.0791435	1.21718	FALSE	FALSE	TRUE	FALSE
Ccn1	10.4576	2.25608	0.022565	0.0729686	1.72012	TRUE	TRUE	TRUE	FALSE
Cystm1	314.069	-1.14953	8.03e-15	4.88e-13	8.30277	TRUE	TRUE	TRUE	FALSE
Cyth2	561.464	1.11275	1.15e-12	4.93e-11	8.46168	TRUE	TRUE	TRUE	FALSE
Cytip	48.921	-1.49063	7.56e-06	8.6e-05	2.62894	TRUE	TRUE	TRUE	FALSE
D030018L15Rik	4.02065	-2.74443	0.0106662	0.0403123	1.66687	FALSE	FALSE	FALSE	FALSE
D030056L22Rik	259.281	-0.694304	0.000792249	0.00483914	3.13553	TRUE	FALSE	TRUE	FALSE
D030068K23Rik	10.8331	-1.47768	0.0318665	0.0956768	1.33892	TRUE	FALSE	FALSE	FALSE
Gatd3a	57.3299	1.55542	7.2e-06	8.27e-05	6.75819	TRUE	TRUE	FALSE	FALSE
D130009I18Rik	6.27418	-4.31061	1.31e-05	0.00013927	4.16481	TRUE	FALSE	FALSE	FALSE
D130017N08Rik	177.067	-0.561973	0.00839289	0.0332203	1.93395	TRUE	FALSE	FALSE	FALSE
Fam91a1	425.237	-0.647896	0.000197482	0.0014869	2.69303	TRUE	TRUE	TRUE	TRUE
Ilrun	491.249	0.827853	2.85e-09	7.26e-08	11.5828	TRUE	FALSE	TRUE	FALSE
D1Pas1	1683.25	0.288593	0.0084315	0.0333442	4.1919	TRUE	TRUE	TRUE	TRUE
Phaf1	46.6984	-0.669638	0.0264493	0.0826636	2.70909	TRUE	FALSE	FALSE	FALSE
D2hgdh	31.9869	-1.0041	0.0159353	0.0557476	1.61489	TRUE	TRUE	TRUE	TRUE
Spout1	420.895	0.637787	0.000199226	0.00149694	3.98838	TRUE	FALSE	TRUE	FALSE
Radx	20.3105	-1.33711	0.00214557	0.0110314	5.98539	TRUE	FALSE	TRUE	FALSE
D330050I16Rik	56.7989	1.35478	0.00138497	0.00771111	2.45826	TRUE	FALSE	FALSE	FALSE
D3Ertd751e	76.3116	-2.36218	9.94e-19	9.21e-17	7.57036	TRUE	TRUE	TRUE	TRUE
D630024D03Rik	5.3861	3.34922	0.0127938	0.0466252	5.96485	FALSE	FALSE	FALSE	FALSE
D630039A03Rik	10.7542	-4.39015	8.05e-08	1.51e-06	2.12715	TRUE	TRUE	TRUE	TRUE
D630045J12Rik	48.3993	0.838963	0.0297247	0.0906746	1.85312	TRUE	TRUE	TRUE	TRUE
D830005E20Rik	1.43092	-5.40382	0.0196508	0.0655302	1.38381	FALSE	FALSE	FALSE	FALSE
Gpr146	4.44421	-4.53709	0.000692258	0.00432241	1.51748	TRUE	TRUE	TRUE	FALSE
Prag1	12.1759	2.49732	0.00361249	0.0168394	4.47992	TRUE	FALSE	FALSE	FALSE
Tmem131l	830.03	0.735549	5.41e-08	1.05e-06	7.48729	TRUE	FALSE	FALSE	FALSE
Thoc2l	177.599	-1.35061	1.26e-09	3.41e-08	3.35918	FALSE	FALSE	TRUE	FALSE
D930020B18Rik	38.4114	-1.22176	0.00357187	0.0166941	1.54282	TRUE	TRUE	TRUE	FALSE
Daam2	481.155	0.836523	5.15e-06	6.21e-05	3.85631	TRUE	TRUE	TRUE	TRUE
Dab2ip	208.389	0.831564	0.000627225	0.00396656	2.60062	TRUE	TRUE	TRUE	FALSE
Dach1	11.8363	2.4479	0.00424866	0.0192413	4.87765	TRUE	TRUE	TRUE	TRUE
Dact1	74.6467	-0.662686	0.00785099	0.0315016	4.86103	TRUE	TRUE	FALSE	FALSE
Dact3	192.676	-1.06947	1.38e-09	3.7e-08	7.11321	TRUE	FALSE	TRUE	FALSE
Dag1	341.929	1.271	4.32e-09	1.07e-07	4.35171	TRUE	TRUE	TRUE	TRUE
Dalrd3	172.638	0.732283	0.000713113	0.00443033	3.5744	FALSE	FALSE	FALSE	FALSE
Dand5	136.398	1.52091	5.47e-11	1.84e-09	12.9185	TRUE	TRUE	TRUE	FALSE
Dapk1	7.41651	2.84293	0.0162218	0.0564683	3.63386	TRUE	TRUE	TRUE	TRUE
Dapk3	103.113	1.08311	0.000117922	0.000962087	3.75497	TRUE	TRUE	TRUE	FALSE
Dapp1	85.0615	-2.75963	0.00490504	0.0216445	4.9534	TRUE	TRUE	TRUE	TRUE
Dars	622.602	-0.828318	0.00147433	0.00810479	1.78864	TRUE	TRUE	TRUE	FALSE
Dars2	72.2442	-1.10764	5.62e-05	0.000501685	3.57787	TRUE	TRUE	TRUE	TRUE
Daxx	532.176	1.14301	4.73e-15	2.97e-13	10.5549	FALSE	TRUE	FALSE	FALSE
Dazap1	546.307	1.14404	8.59e-11	2.8e-09	5.75071	TRUE	FALSE	TRUE	FALSE
Dazap2	506.453	-0.655613	0.000430306	0.00288097	2.55625	TRUE	TRUE	TRUE	FALSE
Dazl	1198.2	-0.605376	0.00192003	0.0100293	1.98777	TRUE	TRUE	TRUE	FALSE
Dbn1	142.303	1.00138	2.46e-05	0.000242862	4.57958	TRUE	FALSE	TRUE	FALSE
Dbnl	96.8319	0.892512	0.0010784	0.00625219	3.32403	TRUE	TRUE	TRUE	TRUE
Dbp	14.6196	1.41438	0.0413011	0.116649	2.11564	TRUE	TRUE	TRUE	TRUE
Dcaf11	233.548	-0.38195	0.0156683	0.0550137	5.48873	TRUE	TRUE	TRUE	TRUE
Dcaf15	401.332	0.936278	8.22e-07	1.22e-05	5.12233	TRUE	TRUE	TRUE	FALSE
Dcaf5	1165.79	1.16231	3.45e-20	3.79e-18	12.8578	TRUE	TRUE	TRUE	FALSE
Dcaf6	1784.25	0.313256	0.0146962	0.0522133	2.67051	FALSE	TRUE	TRUE	FALSE
Dcdc2a	139.108	0.750817	0.00403706	0.0184478	2.4764	TRUE	TRUE	TRUE	FALSE
Dclk1	70.013	-0.989727	0.00015831	0.0012374	3.15906	TRUE	TRUE	TRUE	TRUE
Dclre1a	51.9353	-0.617633	0.0472151	0.128731	2.06541	TRUE	FALSE	TRUE	FALSE
Dcp1b	312.228	0.827269	4.14e-06	5.14e-05	5.13734	FALSE	TRUE	TRUE	TRUE
Dctn1	439.031	0.961646	5.27e-05	0.00047367	3.44366	TRUE	TRUE	TRUE	FALSE
Dctn2	1163.5	0.9037	6.18e-10	1.76e-08	6.58115	TRUE	TRUE	TRUE	FALSE
Dctn4	696.551	-0.495701	0.00178487	0.00948622	2.57768	TRUE	TRUE	TRUE	FALSE
Tes3-ps	1283.93	-0.741196	0.021752	0.0709428	1.17837	FALSE	FALSE	FALSE	FALSE
Dcun1d4	784.855	-1.06697	0.000108529	0.000893445	1.70891	TRUE	TRUE	TRUE	FALSE
Ddhd1	1700.55	0.633293	6.68e-05	0.000584373	4.07414	TRUE	TRUE	TRUE	FALSE
Ddi1	966.968	-0.405514	0.0137118	0.0493501	2.33529	FALSE	FALSE	FALSE	FALSE
Ddi2	38.3653	1.27862	0.00223911	0.0114309	3.41649	TRUE	TRUE	TRUE	TRUE
Ddit4	35.9136	2.95327	5.53e-07	8.54e-06	4.58925	TRUE	FALSE	TRUE	FALSE
Ddost	534.222	0.428327	0.0479321	0.13018	1.68704	TRUE	TRUE	FALSE	FALSE
Ddr1	77.1601	1.52914	3.18e-06	4.07e-05	4.43695	TRUE	TRUE	TRUE	FALSE
Ddrgk1	128.886	0.89259	0.000905054	0.00538401	2.89031	FALSE	TRUE	FALSE	FALSE
Ddx1	1169.85	0.386359	0.0477447	0.129826	1.58418	TRUE	TRUE	TRUE	FALSE
Ddx18	107.981	-0.777232	0.00224034	0.0114309	1.99815	TRUE	TRUE	FALSE	TRUE
Ddx21	566.982	0.583923	1.76e-05	0.000180506	6.77407	TRUE	TRUE	TRUE	FALSE
Ddx23	195.068	0.745945	0.00246523	0.0123302	2.77212	TRUE	TRUE	TRUE	FALSE
Ddx24	767.617	0.587641	0.00130842	0.00735711	2.8706	TRUE	FALSE	TRUE	FALSE
Ddx27	145.048	1.28172	9.54e-08	1.76e-06	6.2075	TRUE	TRUE	TRUE	FALSE
Ddx3x	246.199	-0.401495	0.0409845	0.115988	1.50719	TRUE	TRUE	TRUE	TRUE
Ddx3y	107.087	-0.680056	0.00288783	0.0140887	2.75717	TRUE	TRUE	TRUE	TRUE
Ddx42	414.517	0.467107	0.00827714	0.032869	2.50013	TRUE	TRUE	TRUE	FALSE
Ddx5	3995.54	-1.00543	8.42e-14	4.32e-12	6.50753	TRUE	TRUE	TRUE	TRUE
Ddx50	301.312	-0.849349	4.76e-05	0.000434461	2.4541	TRUE	FALSE	FALSE	FALSE
Ddx52	252.35	-0.889358	0.000528363	0.00342806	1.80916	FALSE	TRUE	TRUE	FALSE
Ddx54	343.257	0.840516	2.71e-05	0.000264288	4.00587	TRUE	TRUE	TRUE	FALSE
Ddx58	51.5598	-0.826493	0.0131709	0.0478088	1.59727	TRUE	TRUE	TRUE	TRUE
Deaf1	53.512	0.834153	0.016115	0.056247	2.52966	TRUE	FALSE	TRUE	FALSE
Trim62	1.39392	-5.37598	0.0208074	0.0685219	1.34461	TRUE	TRUE	TRUE	FALSE
Dedd	566.701	0.587596	1.07e-05	0.000116561	7.73781	TRUE	TRUE	TRUE	TRUE
Defb35	1.44957	-4.41116	0.0354719	0.104	1.28814	FALSE	FALSE	FALSE	FALSE
Dennd1b	201.472	-1.05173	1.16e-08	2.63e-07	5.06095	TRUE	TRUE	TRUE	TRUE
Dennd2d	5.12485	-2.73773	0.00290971	0.0141765	3.04702	FALSE	TRUE	TRUE	TRUE
Dennd3	42.3875	-1.30006	0.00542899	0.0235299	3.30285	TRUE	TRUE	FALSE	FALSE
Dennd4a	300.791	-0.995301	4.09e-09	1.01e-07	8.34387	TRUE	TRUE	TRUE	FALSE
Dennd4c	372.197	-0.490244	0.00699935	0.0288104	2.04899	TRUE	TRUE	TRUE	TRUE
Dennd6a	121.993	-0.768079	0.000285907	0.00203039	3.29481	TRUE	TRUE	TRUE	TRUE
Denr	280.435	1.21173	2.86e-06	3.71e-05	2.73598	TRUE	TRUE	TRUE	FALSE
Depdc1a	1.92641	-3.94849	0.0232948	0.0747664	1.51593	TRUE	TRUE	FALSE	FALSE
Depdc5	288.576	0.677702	0.000133842	0.00107185	4.67153	TRUE	TRUE	TRUE	TRUE
Derl1	169.671	-0.843229	0.000142615	0.00113439	2.92927	TRUE	TRUE	TRUE	TRUE
Derl2	286.944	-1.1508	2.31e-09	5.96e-08	3.73068	TRUE	TRUE	TRUE	TRUE
Des	41.7824	-1.16375	0.000466127	0.00309131	4.1631	TRUE	TRUE	TRUE	FALSE
Desi1	1712.13	0.989813	2.5e-13	1.2e-11	7.56388	TRUE	TRUE	TRUE	FALSE
Dgat2	1021.91	0.330044	0.0265437	0.0828826	2.2041	TRUE	TRUE	TRUE	FALSE
Ess2	131.975	0.792652	0.00439778	0.0198121	2.40632	TRUE	TRUE	TRUE	FALSE
Dgcr6	439.932	0.777884	2.02e-08	4.32e-07	15.5147	TRUE	TRUE	TRUE	FALSE
Dgkq	1068.14	0.525554	0.00205101	0.0106223	3.01672	TRUE	TRUE	TRUE	TRUE
Dgke	119.554	-0.619633	0.0193459	0.0647501	1.56606	TRUE	TRUE	TRUE	TRUE
Dhcr24	214.541	1.27272	1.5e-05	0.000157324	2.45522	TRUE	TRUE	TRUE	FALSE
Dhcr7	81.3627	0.873588	0.00393917	0.0180547	2.85013	TRUE	TRUE	TRUE	TRUE
Dhps	57.2374	-1.38031	0.000229806	0.00168509	3.05445	TRUE	TRUE	FALSE	FALSE
Dhrs1	640.519	0.434337	0.010963	0.0411951	2.48383	FALSE	TRUE	FALSE	FALSE
Dhrs7b	78.4353	-0.714891	0.0161063	0.0562272	1.64622	FALSE	TRUE	TRUE	FALSE
Dhx16	403.742	1.03792	5.32e-06	6.37e-05	4.41493	FALSE	FALSE	FALSE	FALSE
Dhx30	1113.05	0.733138	4.56e-08	9.05e-07	7.27024	FALSE	FALSE	FALSE	FALSE
Dhx32	533.255	-1.91117	4.28e-26	7.16e-24	5.41697	TRUE	FALSE	FALSE	TRUE
Dhx34	182.304	1.04748	2.29e-05	0.000228124	3.68725	TRUE	FALSE	FALSE	FALSE
Dhx37	107.15	1.50406	1.19e-07	2.15e-06	5.06104	TRUE	TRUE	TRUE	FALSE
Dhx38	285.489	1.09103	3.6e-08	7.29e-07	6.16221	TRUE	TRUE	FALSE	FALSE
Dhx40	1049.66	-0.504535	0.013804	0.0496231	1.78735	TRUE	TRUE	TRUE	FALSE
Dhx8	483.529	0.608257	4.39e-06	5.41e-05	13.7103	TRUE	TRUE	FALSE	FALSE
Diablo	1515.77	-0.470813	0.000496283	0.0032488	4.46386	TRUE	TRUE	TRUE	FALSE
Diaph1	265.275	0.478654	0.0134793	0.0486477	2.41288	TRUE	FALSE	TRUE	FALSE
Dimt1	37.4464	-0.946732	0.00660169	0.0274647	2.49355	TRUE	TRUE	TRUE	FALSE
Dio2	45.9038	-0.694755	0.0387758	0.111291	1.93683	TRUE	TRUE	TRUE	TRUE
Dis3l	1602.61	0.578681	0.000396135	0.00267773	3.18304	TRUE	FALSE	FALSE	FALSE
Dkkl1	2931.04	0.566305	0.000153072	0.00120367	3.70006	FALSE	FALSE	FALSE	FALSE
Dlat	416.447	0.498941	0.00183663	0.00968856	3.73706	TRUE	TRUE	TRUE	FALSE
Dlc1	28.4716	1.18137	0.0177529	0.0605383	2.2229	TRUE	TRUE	TRUE	FALSE
Dld	564.19	-0.526745	0.0172018	0.0591044	1.70944	TRUE	TRUE	FALSE	TRUE
Dlec1	388.682	1.05107	5.91e-12	2.3e-10	12.1731	TRUE	TRUE	TRUE	FALSE
Dleu2	28.6878	-1.2149	0.00188719	0.00987756	4.13768	FALSE	FALSE	FALSE	FALSE
Dlg3	75.1216	0.61641	0.0266321	0.0831237	2.75883	TRUE	FALSE	TRUE	FALSE
Dlgap5	80.3076	0.517753	0.0491353	0.132737	2.82336	TRUE	TRUE	TRUE	FALSE
Dll3	97.9261	-0.795985	0.00968825	0.0372724	1.47412	TRUE	TRUE	FALSE	FALSE
Dlx6	14.1998	2.04324	0.00608571	0.0257943	3.48971	FALSE	TRUE	FALSE	FALSE
Dmd	90.865	-1.08648	1.86e-05	0.000188758	2.98275	TRUE	TRUE	TRUE	FALSE
Dmpk	63.132	0.765474	0.0164485	0.0571052	2.64975	FALSE	FALSE	TRUE	FALSE
Dmrt1	80.2963	1.51117	1.42e-07	2.51e-06	12.3722	TRUE	FALSE	TRUE	FALSE
Dmrt3	27.2375	-1.50699	0.000992437	0.00582411	2.96277	FALSE	FALSE	TRUE	FALSE
Dmrtb1	2477.58	1.697	1.05e-58	4.69e-56	46.98	TRUE	FALSE	TRUE	FALSE
Dmrtc1a	133.949	-1.3506	1.19e-09	3.24e-08	4.9652	TRUE	TRUE	TRUE	TRUE
Dmrtc1b	44.7845	-1.63089	1.38e-06	1.94e-05	3.17332	TRUE	TRUE	TRUE	FALSE
Dmwd	283.245	0.521423	0.0101398	0.0386995	2.34552	FALSE	TRUE	FALSE	FALSE
Dmxl1	640.293	-1.01619	1.6e-07	2.81e-06	2.92724	TRUE	TRUE	TRUE	FALSE
Dmxl2	569.29	-0.337661	0.0210265	0.0690704	2.63238	TRUE	TRUE	TRUE	FALSE
Dnaaf1	4472.91	1.18558	9.08e-11	2.95e-09	5.10346	TRUE	TRUE	TRUE	FALSE
Dnaaf2	200.137	0.589351	0.00550088	0.0237681	2.69225	FALSE	TRUE	FALSE	FALSE
Dnaaf3	380.021	0.983774	1.16e-07	2.1e-06	4.81065	TRUE	FALSE	FALSE	FALSE
Dnaaf5	187.842	1.12797	0.000524799	0.00340979	3.17024	TRUE	FALSE	TRUE	FALSE
Dnah1	1948.98	0.604769	1.34e-05	0.000141735	4.67065	FALSE	FALSE	FALSE	FALSE
Dnah10	1109.23	0.474285	0.00557666	0.0240273	2.55834	TRUE	TRUE	FALSE	FALSE
Dnah11	17.5183	-1.21233	0.0164607	0.0571256	1.99941	TRUE	TRUE	FALSE	FALSE
Dnah17	4599.1	0.824473	8.16e-09	1.92e-07	5.20278	FALSE	TRUE	TRUE	TRUE
Dnah7a	1465.36	-1.30871	4.36e-25	6.92e-23	8.98285	TRUE	FALSE	FALSE	FALSE
Dnah7b	1174.95	-0.915148	7.96e-14	4.13e-12	9.4466	TRUE	FALSE	FALSE	FALSE
Dnaja1	473.899	-1.49182	4.39e-20	4.72e-18	5.9945	TRUE	TRUE	TRUE	FALSE
Dnaja4	1003.16	0.872555	1.08e-13	5.47e-12	13.9789	TRUE	TRUE	TRUE	FALSE
Dnajb11	372.942	0.642158	0.000205347	0.00153472	4.05463	TRUE	TRUE	TRUE	TRUE
Dnajb12	219.347	0.652723	0.0232602	0.0746844	1.8512	TRUE	TRUE	TRUE	FALSE
Dnajb2	1075.9	0.425567	0.0152633	0.0538542	2.16746	TRUE	TRUE	TRUE	FALSE
Dnajb3	2595.32	0.373409	0.0198509	0.0660766	1.93873	TRUE	TRUE	FALSE	TRUE
Dnajb4	907.784	0.729267	0.00033301	0.00230044	2.71746	TRUE	TRUE	TRUE	TRUE
Dnajb5	71.3037	0.762752	0.0179325	0.0609699	2.1382	TRUE	TRUE	TRUE	FALSE
Dnajb8	1416.39	0.581001	5.11e-05	0.000460665	3.62959	FALSE	FALSE	FALSE	FALSE
Dnajc14	129.319	0.882646	0.00548389	0.0237172	2.49419	TRUE	TRUE	TRUE	TRUE
Dnajc16	149.937	0.631122	0.0014233	0.00789082	9.01565	TRUE	TRUE	TRUE	FALSE
Dnajc19	70.699	-1.73023	2.29e-09	5.9e-08	6.15884	TRUE	TRUE	TRUE	FALSE
Dnajc21	508.024	0.915339	6.1e-05	0.000538678	2.89853	TRUE	FALSE	TRUE	FALSE
Dnajc25	25.3632	1.20694	0.00968774	0.0372724	5.87672	TRUE	TRUE	TRUE	TRUE
Dnajc4	166.935	0.559081	0.00650964	0.027206	3.28533	FALSE	FALSE	FALSE	FALSE
Dnajc5b	903.809	-0.651329	0.0372073	0.107875	1.01756	TRUE	FALSE	TRUE	FALSE
Dnajc5g	731.849	-0.514698	0.0160679	0.056136	1.83025	TRUE	TRUE	TRUE	TRUE
Dnajc7	1041.32	0.434947	0.00537157	0.0233309	2.44686	TRUE	TRUE	TRUE	FALSE
Dnali1	967.422	0.453783	0.000961033	0.00566166	3.67848	TRUE	TRUE	TRUE	TRUE
Dnm1	119.197	0.799756	0.00485655	0.0214982	2.55342	TRUE	TRUE	TRUE	FALSE
Dnm2	1010.95	0.694177	2.7e-06	3.53e-05	5.4865	TRUE	TRUE	TRUE	FALSE
Dnm3os	46.1767	-2.811	4.26e-11	1.46e-09	2.47108	TRUE	FALSE	FALSE	FALSE
Dnmt1	342.755	1.18509	3.37e-12	1.35e-10	9.29427	TRUE	TRUE	FALSE	TRUE
Dnttip1	165.502	1.79527	3.9e-15	2.48e-13	12.7684	FALSE	FALSE	FALSE	FALSE
Dnttip2	258.722	0.48123	0.0038744	0.0178205	4.88136	FALSE	FALSE	FALSE	FALSE
Doc2a	29.1788	1.21037	0.0225085	0.0728503	1.94053	TRUE	TRUE	TRUE	TRUE
Dock5	241.244	0.542956	0.0066279	0.0275361	2.77739	TRUE	TRUE	TRUE	TRUE
Dock6	182.303	0.9473	1.86e-05	0.000188672	4.42745	TRUE	TRUE	FALSE	FALSE
Dock8	104.456	0.927865	0.00488033	0.021585	2.37985	TRUE	TRUE	FALSE	FALSE
Dop1a	469.547	-0.349348	0.0290331	0.0889066	2.09923	TRUE	FALSE	TRUE	FALSE
Dot1l	1665.97	1.34348	8.34e-16	5.81e-14	5.33046	TRUE	TRUE	TRUE	FALSE
Dpcd	110.377	0.498996	0.0238653	0.076251	4.89955	TRUE	TRUE	TRUE	FALSE
Dpep3	1391.41	1.00416	4.22e-19	4.12e-17	14.4787	FALSE	TRUE	FALSE	FALSE
Dpf3	149.365	0.756014	0.000854604	0.00514086	3.57951	TRUE	TRUE	TRUE	FALSE
Dph1	31.3029	-0.899328	0.0471111	0.128548	1.1416	TRUE	TRUE	TRUE	FALSE
Dph7	49.1958	-0.787099	0.0130986	0.047603	1.75958	TRUE	TRUE	TRUE	TRUE
Dpp10	38.6618	-0.919643	0.0177367	0.0605345	1.36486	TRUE	TRUE	TRUE	FALSE
Dpy19l2	1660.1	-0.745333	5.88e-06	6.96e-05	3.32772	TRUE	TRUE	TRUE	FALSE
Dpyd	29.9186	-0.998777	0.0234271	0.0750657	1.30634	TRUE	TRUE	TRUE	TRUE
Dpysl5	372.799	0.385172	0.0244202	0.0776874	2.34674	TRUE	TRUE	TRUE	TRUE
Drap1	618.706	1.75144	2.75e-22	3.7e-20	12.529	FALSE	TRUE	FALSE	FALSE
Drc7	394.214	0.671776	0.00366086	0.0170184	2.33148	TRUE	TRUE	TRUE	FALSE
Drosha	334.171	0.842628	2.38e-05	0.000235576	3.8825	TRUE	TRUE	FALSE	FALSE
Vps26c	97.1906	-0.776162	0.000405249	0.00273629	5.50664	TRUE	FALSE	TRUE	TRUE
Dsel	41.9786	-1.03865	0.00383384	0.017683	2.11672	TRUE	TRUE	TRUE	TRUE
Dsn1	244.153	-0.460319	0.00553526	0.0238884	4.09219	TRUE	TRUE	FALSE	FALSE
Dst	2002.52	0.336721	0.0160237	0.0560032	2.35076	TRUE	TRUE	TRUE	TRUE
Dstn	189.056	-0.813198	0.0017609	0.00940324	1.78378	TRUE	TRUE	TRUE	FALSE
Dtnb	469.553	0.597767	0.000374078	0.0025536	3.84658	TRUE	TRUE	TRUE	FALSE
Dtx1	117.286	1.07953	1.34e-05	0.000142075	5.50813	TRUE	TRUE	TRUE	TRUE
Dtx3	264.13	1.33596	1.61e-08	3.57e-07	5.457	TRUE	TRUE	TRUE	FALSE
Dtx3l	38.278	-1.62932	1.99e-06	2.71e-05	9.19411	TRUE	FALSE	TRUE	FALSE
Dus1l	238.623	0.455359	0.0199151	0.0662396	2.24593	TRUE	FALSE	TRUE	FALSE
Dus3l	77.6933	0.732214	0.0210662	0.0691759	2.14925	TRUE	TRUE	FALSE	TRUE
Dusp11	206.137	-1.23815	2.29e-10	7.02e-09	4.91334	TRUE	TRUE	TRUE	TRUE
Dusp15	379.983	0.583469	7.23e-05	0.000627425	7.54852	TRUE	TRUE	TRUE	FALSE
Dusp16	187.622	0.384033	0.046516	0.127645	2.90783	TRUE	TRUE	TRUE	TRUE
Dusp19	65.4229	-1.03838	0.000129841	0.00104439	7.2743	TRUE	TRUE	FALSE	TRUE
Dusp26	8.89775	-4.58179	3.05e-07	5.02e-06	2.44533	TRUE	TRUE	TRUE	FALSE
Dusp27	2.87819	3.52363	0.0189634	0.0637034	6.23749	TRUE	TRUE	TRUE	FALSE
Dusp9	2884.24	-9.34281	3.34e-298	1.02e-294	10.0613	TRUE	TRUE	TRUE	TRUE
Dut	172.789	0.519634	0.016618	0.0575778	2.53461	TRUE	TRUE	FALSE	FALSE
Dvl1	565.81	1.02823	1.01e-11	3.85e-10	9.3031	TRUE	TRUE	TRUE	FALSE
Dvl2	140.897	0.796998	0.00158074	0.00857614	2.92656	TRUE	TRUE	FALSE	FALSE
Dvl3	44.1042	1.33333	0.00133671	0.0074846	3.08051	TRUE	TRUE	TRUE	FALSE
Dxo	130.709	1.08286	6.67e-06	7.75e-05	5.13363	FALSE	TRUE	TRUE	FALSE
Dydc2	207.87	-0.795444	0.010029	0.0383488	1.36382	FALSE	TRUE	FALSE	FALSE
Dym	469.413	0.831964	3e-06	3.86e-05	4.7435	TRUE	FALSE	FALSE	FALSE
Dync1h1	6470.59	0.579292	0.000581577	0.00372227	2.90105	FALSE	FALSE	FALSE	FALSE
Dync1li1	44.7019	1.0514	0.00351208	0.0164567	3.95481	TRUE	TRUE	FALSE	FALSE
Dync1li2	737.554	0.36672	0.00890599	0.0348661	3.06589	TRUE	TRUE	TRUE	TRUE
Dync2h1	2809.25	-0.737308	5.22e-08	1.02e-06	6.07195	FALSE	TRUE	TRUE	FALSE
Dynll2	1113.46	0.871948	4.98e-14	2.68e-12	14.0966	TRUE	TRUE	TRUE	TRUE
Dynlt1a	117.183	-1.20752	0.00479019	0.0212559	1.26791	FALSE	TRUE	TRUE	FALSE
Dynlt1b	48.8585	-2.47078	0.000998904	0.00585641	1.80655	TRUE	FALSE	TRUE	FALSE
Dynlt3	117.518	-0.802982	0.00476053	0.02115	1.65394	TRUE	TRUE	TRUE	FALSE
Dyrk1a	231.686	0.65427	0.00266146	0.0131602	2.74041	TRUE	TRUE	TRUE	TRUE
Dyrk1b	2607.64	0.606397	9.34e-07	1.38e-05	5.35342	TRUE	TRUE	FALSE	FALSE
Dyrk2	167.551	-0.642623	0.00641475	0.0269016	2.19227	TRUE	TRUE	FALSE	FALSE
Dyrk3	767.993	0.899227	2e-09	5.26e-08	6.30645	FALSE	TRUE	FALSE	FALSE
Dysf	10.6922	2.2925	0.0075534	0.0306145	5.80112	TRUE	TRUE	FALSE	TRUE
Dnaaf4	207.164	-0.564438	0.00845866	0.0334298	1.81416	TRUE	TRUE	FALSE	FALSE
Dzank1	74.458	-0.88081	0.00258713	0.0128448	2.06938	TRUE	TRUE	TRUE	TRUE
Dzip3	414.268	-0.907848	6.65e-05	0.000583017	2.40671	TRUE	TRUE	TRUE	TRUE
E030003E18Rik	28.0212	-2.52029	0.000455457	0.00303156	3.61321	TRUE	FALSE	FALSE	FALSE
E030024N20Rik	13.9913	-3.70548	3.07e-08	6.31e-07	6.49194	FALSE	FALSE	FALSE	FALSE
E030044B06Rik	5.13751	-2.00912	0.037202	0.107875	2.48133	TRUE	FALSE	FALSE	FALSE
E130201H02Rik	10.5624	-1.56584	0.0141152	0.0505131	1.56328	FALSE	FALSE	FALSE	FALSE
E130307A14Rik	40.9561	-0.918792	0.0101183	0.0386418	1.83651	FALSE	FALSE	FALSE	FALSE
Ents15	72.4942	1.19182	9.48e-05	0.000793147	4.93201	TRUE	FALSE	FALSE	FALSE
E230029C05Rik	18.8594	-1.05005	0.0402337	0.114395	1.34123	TRUE	FALSE	FALSE	FALSE
E2f4	119.124	1.58801	1.77e-10	5.51e-09	11.9505	TRUE	TRUE	TRUE	FALSE
E2f5	115.414	-0.501882	0.0283071	0.0872249	2.12912	TRUE	TRUE	TRUE	FALSE
E2f6	24.6783	1.83102	0.000879679	0.00526699	3.90331	TRUE	TRUE	TRUE	TRUE
E2f7	37.397	1.12281	0.0175632	0.0600725	1.93944	TRUE	TRUE	TRUE	FALSE
E2f8	90.1145	0.817572	0.000916048	0.00543347	9.03563	TRUE	TRUE	TRUE	FALSE
E330033B04Rik	17.2155	-2.39305	0.000140995	0.00112224	6.07042	FALSE	FALSE	FALSE	FALSE
E4f1	63.7452	0.821616	0.0111792	0.0417927	2.74099	TRUE	FALSE	TRUE	FALSE
Eaf1	166.832	0.593655	0.0243238	0.0774482	1.76356	TRUE	TRUE	TRUE	TRUE
Ebag9	136.219	0.614036	0.0305069	0.0924731	1.65568	TRUE	TRUE	TRUE	TRUE
Ebna1bp2	202.132	0.471277	0.0188157	0.0632638	2.5657	TRUE	TRUE	TRUE	FALSE
Ebpl	16.0891	-1.14291	0.0282015	0.0869729	1.64253	TRUE	TRUE	TRUE	FALSE
Ecd	254.843	0.484882	0.0380944	0.109836	1.76493	TRUE	TRUE	TRUE	TRUE
Ece1	101.498	1.76503	1.69e-08	3.7e-07	4.34232	TRUE	TRUE	TRUE	FALSE
Ece2	16.1744	-1.12572	0.0429516	0.120305	1.41853	TRUE	FALSE	FALSE	FALSE
Echdc1	88.591	-1.12071	0.00106	0.00616509	2.18852	TRUE	TRUE	TRUE	FALSE
Eci1	11.6134	1.39242	0.048329	0.130938	3.03035	TRUE	TRUE	FALSE	FALSE
Ecm1	57.8777	2.68911	1.75e-08	3.81e-07	3.89365	FALSE	TRUE	FALSE	FALSE
Sparcl1	42.7238	-1.89106	7.73e-09	1.82e-07	5.00962	TRUE	FALSE	FALSE	FALSE
Ecsit	121.302	0.79003	0.0143257	0.0511219	1.91385	FALSE	TRUE	FALSE	FALSE
Ect2	365.674	-0.619619	0.00221523	0.0113313	2.13893	TRUE	TRUE	TRUE	TRUE
Eda2r	4.55203	-2.11143	0.0237274	0.0758536	2.1404	TRUE	TRUE	TRUE	TRUE
Edc4	678.34	0.477509	0.0219566	0.0714376	2.01887	TRUE	FALSE	FALSE	FALSE
Edem2	95.2622	1.32274	6.73e-05	0.000588376	3.74081	FALSE	TRUE	FALSE	FALSE
Edem3	2580.12	-4.75907	2.07e-221	3.78e-218	17.1924	TRUE	TRUE	TRUE	TRUE
Edf1	305.074	0.793412	2.88e-05	0.000278697	4.18022	FALSE	TRUE	FALSE	FALSE
Edil3	9.38533	-2.11771	0.00276167	0.0135529	1.85884	TRUE	TRUE	TRUE	TRUE
Eea1	267.493	-0.368434	0.0363625	0.106022	1.88624	TRUE	TRUE	TRUE	FALSE
Eef1a1	2715.19	-1.55137	1.41e-33	3.53e-31	14.3708	TRUE	TRUE	TRUE	FALSE
Eef1d	2256.17	0.559553	3.61e-08	7.3e-07	11.6446	TRUE	TRUE	FALSE	FALSE
Eef1g	1188.54	-0.575071	2.75e-05	0.000267169	3.7383	TRUE	TRUE	FALSE	FALSE
Eef2	6907.51	0.45327	0.00407758	0.0185864	2.75367	TRUE	TRUE	TRUE	FALSE
Eef2k	76.3917	0.747284	0.00627071	0.0264189	3.63772	TRUE	TRUE	TRUE	TRUE
Efcab1	76.0181	-1.11153	0.00130826	0.00735711	3.51646	TRUE	TRUE	TRUE	TRUE
Efcab10	422.465	-1.02276	2.61e-06	3.43e-05	4.95268	FALSE	FALSE	FALSE	FALSE
Egfem1	51.4717	-0.69368	0.0336159	0.0998412	1.45354	TRUE	TRUE	TRUE	FALSE
Efcab12	179.869	0.375105	0.0482876	0.130892	3.31321	TRUE	TRUE	FALSE	TRUE
Efcab6	2094.99	0.559631	6.75e-06	7.82e-05	4.98753	TRUE	TRUE	FALSE	FALSE
Efcab9	580.188	-0.702646	0.0357649	0.104657	0.965611	FALSE	TRUE	FALSE	FALSE
Efemp2	22.026	1.16237	0.0198682	0.0661151	5.05881	FALSE	TRUE	TRUE	FALSE
Efhb	539.252	-0.318606	0.0245501	0.0779918	2.3159	TRUE	TRUE	FALSE	FALSE
Efhc1	1867.78	-0.663996	9.75e-06	0.000107556	3.18612	TRUE	TRUE	TRUE	FALSE
Efhc2	235.884	-1.10733	0.000221391	0.00163191	1.61425	FALSE	FALSE	FALSE	FALSE
Efhd2	272.652	1.53405	1.53e-14	8.9e-13	8.67447	TRUE	TRUE	TRUE	FALSE
Efna5	30.396	-2.91889	1.23e-09	3.32e-08	2.06289	TRUE	TRUE	TRUE	TRUE
Efnb1	40.4889	1.28651	0.00423508	0.019194	2.40561	TRUE	TRUE	TRUE	TRUE
Efr3a	949.322	-0.456009	0.000852957	0.00513603	3.06095	TRUE	TRUE	TRUE	TRUE
Efl1	297.599	0.990543	9.21e-05	0.000773282	2.82009	TRUE	FALSE	FALSE	FALSE
Egfem1	242.001	-9.16624	7.3e-48	2.51e-45	3.77136	TRUE	TRUE	TRUE	FALSE
Egln2	1798.82	1.19421	5.02e-24	7.39e-22	15.8971	TRUE	TRUE	TRUE	FALSE
Egr1	31.4678	1.51473	0.00190714	0.00997342	3.18785	TRUE	TRUE	TRUE	FALSE
Egr3	159.849	-0.855307	0.00553435	0.0238884	1.50412	TRUE	TRUE	TRUE	FALSE
Ehbp1	612.963	1.01673	4.32e-08	8.61e-07	5.16341	TRUE	TRUE	TRUE	TRUE
Ehbp1l1	757.874	0.688865	6.69e-07	1.01e-05	6.62055	FALSE	TRUE	TRUE	TRUE
Ehd1	1635.36	1.0133	1.19e-13	5.97e-12	7.89651	TRUE	TRUE	TRUE	FALSE
Ehd4	32.8342	1.60324	0.000354989	0.00243567	5.52601	TRUE	TRUE	TRUE	TRUE
Ehmt2	1271.89	1.157	1.82e-15	1.2e-13	8.38398	TRUE	FALSE	FALSE	FALSE
Eid2	35.5641	1.18838	0.00263366	0.0130439	7.02109	FALSE	TRUE	FALSE	FALSE
Eid2b	32.4639	1.2766	0.00258114	0.0128186	6.08764	FALSE	TRUE	TRUE	FALSE
Eif1	405.926	-1.69746	4.18e-16	3.06e-14	10.8645	TRUE	FALSE	TRUE	FALSE
Eif1a	403.257	-1.12904	9.46e-10	2.62e-08	4.34896	TRUE	TRUE	TRUE	FALSE
Eif1ad	131.428	1.18646	0.000144778	0.00114984	3.33347	TRUE	TRUE	TRUE	TRUE
Eif1b	422.132	1.39103	4.93e-12	1.93e-10	5.81233	TRUE	TRUE	TRUE	FALSE
Eif2ak1	249.793	0.456903	0.00820777	0.0326219	3.65941	TRUE	TRUE	TRUE	FALSE
Eif2b4	274.626	0.789313	4.77e-06	5.82e-05	6.68598	FALSE	FALSE	FALSE	FALSE
Eif2s1	743.133	-1.16362	3.09e-08	6.33e-07	2.94492	TRUE	TRUE	TRUE	TRUE
Eif2s2	487.498	-1.15681	0.000696429	0.00434251	1.43756	TRUE	TRUE	TRUE	FALSE
Eif2s3y	269.15	-0.655758	0.0193918	0.0648456	1.27598	TRUE	TRUE	FALSE	FALSE
Eif3b	2296.67	0.487455	0.000576838	0.00369787	3.53366	TRUE	TRUE	FALSE	FALSE
Eif3c	1921.08	0.432815	0.00242397	0.012159	2.81007	FALSE	FALSE	FALSE	FALSE
Eif3d	522.528	0.487312	0.00145006	0.00800011	3.70903	TRUE	FALSE	FALSE	FALSE
Eif3e	700.011	-1.37733	0.000201652	0.0015133	1.36943	FALSE	TRUE	FALSE	FALSE
Eif3f	506.03	1.14031	4.09e-10	1.2e-08	7.01268	FALSE	TRUE	FALSE	FALSE
Eif3g	610.428	0.775428	3.82e-10	1.13e-08	31.1142	FALSE	TRUE	TRUE	FALSE
Eif3m	184.485	-1.77053	2.86e-08	5.93e-07	2.20127	FALSE	FALSE	FALSE	FALSE
Eif4a1	244.598	-0.684514	5.51e-05	0.000492728	5.29573	TRUE	TRUE	TRUE	TRUE
Eif4a2	739.678	-0.953047	6.02e-07	9.23e-06	2.93046	TRUE	TRUE	TRUE	TRUE
Eif4a3	209.968	0.752751	0.000184022	0.0014009	4.15965	TRUE	TRUE	FALSE	FALSE
Eif4b	759.588	0.522764	0.00292815	0.0142435	2.93852	TRUE	TRUE	TRUE	TRUE
Eif4e	609.92	-0.783601	5.96e-05	0.000526823	2.66168	TRUE	TRUE	TRUE	TRUE
Eif4e2	846.81	0.589461	0.000296231	0.00209392	3.33864	TRUE	TRUE	TRUE	TRUE
Eif4ebp1	45.2111	-1.04677	0.00164096	0.00886332	2.7714	TRUE	TRUE	TRUE	FALSE
Eif4ebp2	126.136	0.692891	0.00274635	0.0134886	3.70905	TRUE	TRUE	TRUE	FALSE
Eif4g1	2551.58	0.706389	1.22e-08	2.76e-07	7.60852	TRUE	TRUE	FALSE	FALSE
Eif4g3	3321.19	1.16442	2.75e-17	2.35e-15	10.2637	TRUE	TRUE	TRUE	TRUE
Eif4h	934.942	0.589272	7.19e-07	1.08e-05	8.81839	TRUE	TRUE	TRUE	TRUE
Eif5a	1792.46	-0.734398	2.15e-05	0.000214977	2.90513	TRUE	TRUE	TRUE	TRUE
Eif5a2	218.925	-1.11325	3.84e-07	6.13e-06	3.14756	TRUE	TRUE	TRUE	TRUE
Eif5b	1389.15	0.55002	0.000987776	0.00579862	2.78207	TRUE	TRUE	TRUE	FALSE
Elac2	127.582	0.777776	0.00038816	0.00263553	5.78533	FALSE	TRUE	TRUE	FALSE
Elfn1	259.287	1.16484	6.97e-09	1.65e-07	5.60092	TRUE	TRUE	TRUE	FALSE
[truncated: 4,788 more rows]

## Sheet: tKO
Symbol	baseMean	log2FoldChange	pvalue	padj	Cohen_d	microrna.org	Targetscan	mirwalk	mirdb
0610009L18Rik	160.968	-0.694695	0.004264	0.0240824	2.95422	TRUE	TRUE	FALSE	FALSE
Dele1	230.744	0.826593	0.00027956	0.00283907	4.48979	TRUE	TRUE	TRUE	FALSE
Sanbr	359.282	-0.787612	0.00159553	0.0112789	1.86989	TRUE	FALSE	FALSE	FALSE
0610010K14Rik	22.2335	1.36088	0.0168563	0.0673046	2.45512	TRUE	TRUE	FALSE	FALSE
0610039H22Rik	1.78962	-5.27755	0.028172	0.0978751	0.816497	TRUE	FALSE	FALSE	FALSE
Fmc1	28.0529	0.942358	0.0405614	0.126631	3.56481	TRUE	TRUE	FALSE	FALSE
1110006O24Rik	107.163	-1.22101	0.000179435	0.00198617	1.99456	FALSE	FALSE	FALSE	FALSE
Card19	16.2152	1.43222	0.0338361	0.11131	2.60916	TRUE	FALSE	TRUE	TRUE
Prorp	45.0224	-0.880456	0.0146588	0.0602972	2.46185	TRUE	FALSE	FALSE	FALSE
Bbln	63.38	0.992008	0.0101142	0.0460597	2.58933	FALSE	FALSE	FALSE	FALSE
1110019D14Rik	9.14084	-1.49374	0.0383119	0.121716	3.34346	TRUE	FALSE	FALSE	FALSE
1110032A03Rik	1023.54	-0.57402	0.0448296	0.136125	1.01882	TRUE	TRUE	TRUE	FALSE
1110058D11Rik	1.90616	-4.35537	0.0298474	0.101735	1.39704	FALSE	FALSE	FALSE	FALSE
1110059E24Rik	66.9567	-1.3243	0.000107333	0.00130711	2.41721	TRUE	TRUE	TRUE	FALSE
1110065P20Rik	85.4717	1.17798	0.00214306	0.0142145	2.10156	TRUE	TRUE	TRUE	FALSE
1500015L24Rik	1.28767	-4.78479	0.0431002	NA	1.61993	FALSE	FALSE	FALSE	FALSE
1600012H06Rik	40.4876	-1.07943	0.00662229	0.0333569	2.08822	TRUE	TRUE	TRUE	TRUE
1700001J11Rik	1622.56	-0.519102	0.0148	0.0609208	1.70365	FALSE	FALSE	FALSE	FALSE
1700001K19Rik	608.313	0.448473	0.0430174	0.132129	1.43116	FALSE	FALSE	FALSE	FALSE
1700001L05Rik	1725.36	-0.522233	0.00097872	0.00762471	4.38889	FALSE	FALSE	FALSE	FALSE
1700001L19Rik	257.774	0.597537	0.0125273	0.0537528	2.05312	FALSE	TRUE	TRUE	TRUE
1700001O22Rik	740.776	0.706176	0.00146519	0.0105744	2.3483	FALSE	TRUE	TRUE	FALSE
1700003E16Rik	1892.25	0.803131	1.52e-06	3.53e-05	6.84222	FALSE	TRUE	FALSE	FALSE
1700003F12Rik	999.958	1.56035	6.34e-12	5.33e-10	3.36391	FALSE	FALSE	TRUE	FALSE
1700003G18Rik	38.2816	-1.1842	0.00725	0.0356949	1.61936	FALSE	FALSE	FALSE	FALSE
1700003P14Rik	168.921	-1.476	1.58e-05	0.000260093	1.59834	TRUE	FALSE	FALSE	FALSE
1700006A11Rik	610.858	-1.51118	1.39e-11	1.07e-09	3.40841	TRUE	TRUE	TRUE	TRUE
Cfap97d1	288.614	-0.945137	0.00234639	0.0151962	1.27839	FALSE	FALSE	FALSE	FALSE
Iqcm	425.647	-0.555326	0.0327026	0.108517	1.27719	TRUE	FALSE	FALSE	FALSE
1700007F19Rik	42.2858	-1.99994	1.58e-07	4.92e-06	4.46554	FALSE	FALSE	FALSE	FALSE
Cfap299	269.986	-0.764321	0.00748	0.0365304	1.4738	FALSE	FALSE	FALSE	FALSE
Pierce1	79.0407	1.32511	2.49e-05	0.000382395	6.49657	FALSE	FALSE	FALSE	FALSE
1700007P06Rik	71.6075	-0.680326	0.0315854	0.105948	2.35785	TRUE	FALSE	FALSE	FALSE
1700008K24Rik	1181.15	-0.464186	0.01733	0.0688308	2.49841	FALSE	FALSE	FALSE	FALSE
1700008P02Rik	216.549	-1.11076	0.000645	0.00546719	1.89984	FALSE	TRUE	TRUE	FALSE
1700009C05Rik	98.8577	-1.60297	6.61e-08	2.28e-06	4.44746	FALSE	FALSE	FALSE	FALSE
1700009J07Rik	464.381	-0.789473	0.000297306	0.0029722	3.25602	TRUE	TRUE	FALSE	FALSE
1700009N14Rik	1666.36	0.432808	0.0176139	0.0696227	2.19177	TRUE	TRUE	TRUE	TRUE
1700010I02Rik	8.18239	-2.31953	0.0046087	0.02551	2.4766	FALSE	FALSE	FALSE	FALSE
1700010J16Rik	57.0713	-0.955024	0.00998113	0.0455374	1.71917	TRUE	FALSE	FALSE	FALSE
Stpg4	865.301	-0.504493	0.0381488	0.121275	1.20415	FALSE	FALSE	FALSE	FALSE
1700012D01Rik	35.9792	-0.909972	0.0183279	0.0717335	3.7607	FALSE	FALSE	FALSE	FALSE
1700012D14Rik	15.8514	-1.11781	0.044792	0.136059	2.26156	FALSE	FALSE	FALSE	FALSE
Cfap107	201.059	-0.709322	0.0122425	0.052832	1.4225	TRUE	FALSE	FALSE	FALSE
1700013G24Rik	1255.88	0.400902	0.0144459	0.059677	3.4613	FALSE	FALSE	FALSE	FALSE
1700013H16Rik	115.06	-1.6913	4.47e-08	1.61e-06	2.70445	FALSE	FALSE	TRUE	FALSE
Pttg1ip2	361.948	-0.760252	0.0030276	0.0184872	1.94	FALSE	FALSE	FALSE	FALSE
1700016D06Rik	217.206	-0.639089	0.0327426	0.108588	1.1556	FALSE	FALSE	FALSE	FALSE
1700016K19Rik	463.82	1.08082	5.16e-08	1.84e-06	4.84448	FALSE	TRUE	FALSE	FALSE
1700016P04Rik	335.092	-1.08792	4.32e-05	0.000606978	2.39813	TRUE	FALSE	FALSE	FALSE
1700017B05Rik	524.159	0.588301	0.00580536	0.0301868	2.25627	TRUE	TRUE	TRUE	FALSE
Ms4a20	680.233	-0.550787	0.017	0.0676678	1.70638	FALSE	FALSE	FALSE	FALSE
1700017G19Rik	168.631	-0.730424	0.00679	0.0340211	2.05562	FALSE	FALSE	FALSE	FALSE
1700017N19Rik	599.215	-0.786424	0.00641417	0.0325887	1.23621	TRUE	FALSE	FALSE	FALSE
1700018B24Rik	293.689	0.987079	0.000944704	0.0074242	1.88397	TRUE	FALSE	FALSE	FALSE
1700018F24Rik	152.456	-0.520156	0.0339872	0.111646	2.26214	FALSE	FALSE	TRUE	FALSE
1700019A02Rik	350.681	-1.14127	0.000112133	0.00134869	1.68555	TRUE	TRUE	FALSE	FALSE
1700019M22Rik	706.307	-1.0232	0.000825871	0.0066628	1.332	TRUE	FALSE	FALSE	FALSE
1700019N19Rik	913.308	0.622061	0.0064009	0.03255	1.65909	TRUE	TRUE	TRUE	FALSE
Oip5os1	130.763	-0.884146	0.00568618	0.029692	1.37362	TRUE	FALSE	FALSE	FALSE
1700020N01Rik	235.648	-0.496995	0.0273228	0.095907	2.0464	TRUE	TRUE	FALSE	FALSE
1700020N15Rik	14.2512	-2.65616	0.000131675	0.00153962	2.50014	FALSE	FALSE	TRUE	FALSE
Rubcn	430.654	0.558755	0.0207307	0.0786547	1.70741	FALSE	FALSE	TRUE	TRUE
1700022A21Rik	547.624	0.660801	0.0104242	0.0470137	1.40813	FALSE	FALSE	FALSE	FALSE
1700022A22Rik	66.4859	-0.894503	0.0144028	0.0595699	1.47519	TRUE	FALSE	FALSE	FALSE
1700022E09Rik	12.6741	-1.78983	0.00854045	0.0403915	2.69967	FALSE	FALSE	FALSE	FALSE
1700023C21Rik	21.9968	-1.3224	0.00874473	0.041077	1.88133	TRUE	FALSE	FALSE	FALSE
Efcab15	385.3	1.22662	5.61e-07	1.47e-05	3.19944	FALSE	FALSE	FALSE	FALSE
1700025B11Rik	57.5273	-0.91651	0.0103819	0.0469083	2.94704	FALSE	FALSE	FALSE	FALSE
Ms4a19	211.478	-0.647649	0.00796237	0.0382812	2.22408	TRUE	FALSE	TRUE	TRUE
1700025M24Rik	63.0639	-1.33652	0.000107873	0.00131183	2.56844	FALSE	FALSE	FALSE	FALSE
1700026J14Rik	2.81793	3.99232	0.0155907	0.0633761	4.97352	FALSE	FALSE	FALSE	FALSE
1700027A15Rik	1031.61	0.71187	0.00581114	0.0302078	1.76933	FALSE	FALSE	FALSE	FALSE
1700027F06Rik	129.931	-1.24715	0.000109847	0.00132838	2.56139	FALSE	FALSE	FALSE	FALSE
1700027F09Rik	38.3127	-1.55282	0.000379265	0.00361388	1.97163	FALSE	FALSE	FALSE	FALSE
1700027I24Rik	17.035	-1.8945	0.00239045	0.0154353	2.24449	FALSE	FALSE	FALSE	FALSE
1700028E10Rik	31.9011	-1.14743	0.00525	0.0279916	3.26195	TRUE	FALSE	FALSE	FALSE
1700028J19Rik	1172.66	-0.705433	0.000175218	0.00194368	3.59492	TRUE	TRUE	FALSE	FALSE
1700028K03Rik	43.9204	-0.879187	0.0338399	0.11131	1.49472	TRUE	FALSE	TRUE	TRUE
1700028M03Rik	8.13888	-2.81347	0.000588561	0.00509252	7.57801	FALSE	FALSE	FALSE	FALSE
1700029H14Rik	1470.77	0.7556	7.95e-05	0.00100482	3.31941	TRUE	TRUE	TRUE	FALSE
1700029M20Rik	940.301	-0.571697	0.000719198	0.00596345	4.65334	TRUE	FALSE	FALSE	FALSE
1700029N11Rik	51.3516	-1.6083	0.000551174	0.00484904	1.32113	TRUE	FALSE	FALSE	FALSE
1700030J22Rik	1094.17	0.642456	0.000394002	0.00372602	3.38196	TRUE	TRUE	TRUE	FALSE
1700030L20Rik	30.8525	1.24982	0.0242724	0.0882007	1.60828	FALSE	FALSE	FALSE	FALSE
1700030N03Rik	45.9415	-1.67075	6.46e-06	0.000123313	3.9015	FALSE	FALSE	FALSE	FALSE
1700034E13Rik	496.568	-0.767907	0.00260813	0.0165023	1.6907	FALSE	FALSE	FALSE	FALSE
1700034H15Rik	72.9482	-1.46674	1.48e-06	3.45e-05	9.73912	FALSE	FALSE	FALSE	FALSE
1700034I23Rik	550.615	-0.981189	1.26e-05	0.000217593	3.64504	TRUE	TRUE	TRUE	FALSE
1700037H04Rik	651.182	0.527165	0.013	0.0554698	2.14879	FALSE	FALSE	TRUE	FALSE
1700041C23Rik	71.8333	-1.66665	7.47e-06	0.000140373	2.66856	TRUE	FALSE	FALSE	FALSE
1700042G15Rik	385.245	-1.0475	5.3e-07	1.4e-05	4.57406	FALSE	FALSE	FALSE	FALSE
1700044C05Rik	5.35	-2.28918	0.0188209	0.0731535	2.83614	FALSE	FALSE	FALSE	FALSE
1700046C09Rik	44.8036	-1.19864	0.0063752	0.0324895	1.49203	FALSE	FALSE	FALSE	FALSE
1700047A11Rik	19.6013	-1.22638	0.0266	0.0944613	1.87938	TRUE	FALSE	FALSE	FALSE
1700047G03Rik	70.8933	-1.19142	8.36e-05	0.00105046	5.74067	TRUE	FALSE	FALSE	FALSE
Zfp974	99.5474	-1.82209	7.42e-09	3.41e-07	5.32995	TRUE	FALSE	TRUE	FALSE
1700049L16Rik	357.944	0.581068	0.0381	0.121081	1.1726	TRUE	FALSE	FALSE	FALSE
1700052I22Rik	86.9607	-1.42188	0.00037606	0.00359145	1.46129	FALSE	FALSE	FALSE	FALSE
1700052K11Rik	77.1889	1.27169	0.00022939	0.00240873	3.22899	TRUE	FALSE	FALSE	FALSE
1700056E22Rik	148.843	0.707312	0.00500021	0.0270481	3.52875	FALSE	FALSE	FALSE	FALSE
1700061F12Rik	142.183	-0.661623	0.0321	0.107259	1.45573	TRUE	FALSE	FALSE	FALSE
1700061I17Rik	42.6277	-2.21011	2.25e-07	6.64e-06	2.46537	FALSE	FALSE	FALSE	FALSE
1700061J23Rik	45.6877	-0.850306	0.0325586	0.108192	1.44777	FALSE	FALSE	FALSE	FALSE
1700064M15Rik	186.52	-3.00721	2.48e-36	7.8e-34	8.67741	FALSE	FALSE	FALSE	FALSE
1700066M21Rik	154.825	-1.13826	8.02e-06	0.000149051	3.63094	FALSE	TRUE	TRUE	FALSE
1700067G17Rik	65.7091	-1.30005	0.000402647	0.00379303	2.28683	FALSE	FALSE	FALSE	FALSE
1700067K01Rik	103.251	0.56365	0.0485142	0.144087	2.28368	FALSE	TRUE	TRUE	FALSE
1700067P10Rik	202.167	-0.58175	0.0181871	0.0713568	2.4973	TRUE	FALSE	FALSE	FALSE
1700069L16Rik	24.7918	-1.03402	0.0291464	0.0999956	2.00147	FALSE	FALSE	FALSE	FALSE
1700071M16Rik	108.57	-1.08485	0.000666985	0.00560845	2.04928	FALSE	FALSE	FALSE	FALSE
1700072O05Rik	23.811	-1.05136	0.0453317	0.137008	1.14124	TRUE	FALSE	FALSE	FALSE
1700074H08Rik	21.995	-1.36332	0.0281397	0.0978415	1.27492	FALSE	FALSE	FALSE	FALSE
Prss59	1987.23	-0.918809	0.000421083	0.00393884	1.59033	TRUE	FALSE	FALSE	FALSE
1700084M14Rik	148.311	-0.948384	0.00652914	0.0330371	1.18907	FALSE	TRUE	FALSE	FALSE
1700086L19Rik	424.028	0.445193	0.0405092	0.126569	1.72078	TRUE	FALSE	FALSE	FALSE
1700092C10Rik	52.2786	-1.2748	0.000822858	0.00664468	2.54165	FALSE	FALSE	FALSE	FALSE
1700093K21Rik	782.636	-0.967196	0.00106461	0.00815181	1.4476	FALSE	TRUE	FALSE	FALSE
Cfap141	113.09	-0.776594	0.0206442	0.0784558	1.19701	TRUE	FALSE	FALSE	FALSE
1700095A21Rik	134.378	-1.37304	1.07e-05	0.000190145	1.94706	TRUE	FALSE	FALSE	FALSE
Cfap77	29.2012	1.20199	0.0202909	0.0774446	2.32859	TRUE	TRUE	FALSE	FALSE
1700101O22Rik	146.167	-0.661529	0.0184699	0.0721657	1.78022	FALSE	FALSE	FALSE	FALSE
1700102H20Rik	16.1535	-1.45419	0.0111038	0.0492441	2.33768	TRUE	FALSE	FALSE	FALSE
1700108J01Rik	207.878	-0.723973	0.00780701	0.0377324	1.71846	FALSE	FALSE	FALSE	FALSE
1700109H08Rik	155.844	-1.42998	6.12e-06	0.000117846	1.93977	TRUE	TRUE	FALSE	FALSE
1700109K24Rik	36.0495	-2.0068	5.96e-05	0.000792092	4.37019	TRUE	FALSE	FALSE	FALSE
1700110C19Rik	32.7444	-1.00412	0.0232007	0.0853504	1.43284	FALSE	FALSE	FALSE	FALSE
1700112J05Rik	21.684	-1.62135	0.00891	0.0416484	1.11813	FALSE	FALSE	FALSE	FALSE
1700112J16Rik	29.6477	-1.13698	0.00732161	0.0359332	4.09235	FALSE	FALSE	FALSE	FALSE
1700120E14Rik	62.663	-1.05819	0.0033926	0.0202166	2.09109	FALSE	FALSE	FALSE	FALSE
1700120G07Rik	32.5788	-2.20101	9.34e-07	2.31e-05	2.96772	FALSE	FALSE	FALSE	FALSE
1700123L14Rik	1956.9	1.03141	7e-10	3.98e-08	6.5337	FALSE	FALSE	FALSE	FALSE
1700123M08Rik	27.1442	-0.987803	0.0392344	0.123964	1.5274	FALSE	FALSE	FALSE	FALSE
1700125H03Rik	58.2064	-0.676478	0.0481175	0.143342	2.10596	TRUE	FALSE	FALSE	FALSE
1700129C05Rik	1167.63	-0.978608	5.05e-05	0.000687877	2.4198	TRUE	TRUE	TRUE	TRUE
1810013L24Rik	570.544	-0.690715	0.000290354	0.00291279	3.76185	TRUE	TRUE	TRUE	TRUE
1810014B01Rik	7.58028	-1.78953	0.0281813	0.097888	2.77448	TRUE	FALSE	FALSE	FALSE
1810024B03Rik	25.9038	-1.07087	0.0321757	0.107408	1.43268	TRUE	FALSE	FALSE	FALSE
Chaserr	57.5723	-0.741101	0.037499	0.119882	1.79631	FALSE	FALSE	FALSE	FALSE
1810034E14Rik	9.00387	-1.78722	0.0161626	0.0651209	2.68678	TRUE	FALSE	FALSE	FALSE
Cfap410	80.2629	1.03661	0.000887509	0.00706131	3.6717	TRUE	FALSE	TRUE	FALSE
1810065E05Rik	13.7925	-1.87777	0.00318713	0.0192844	1.99752	FALSE	FALSE	FALSE	FALSE
2010109A12Rik	57.0227	-1.07894	0.00845315	0.0401322	1.42685	FALSE	FALSE	FALSE	FALSE
Aopep	107.349	-0.63292	0.0272	0.0956572	2.13948	TRUE	FALSE	TRUE	TRUE
2010315B03Rik	6.18745	-2.5817	0.0103772	0.0468993	1.51383	TRUE	TRUE	TRUE	FALSE
Misp3	14.9941	1.57706	0.0362775	0.116948	1.84735	FALSE	FALSE	TRUE	FALSE
Ube2d-ps	40.4422	-0.852283	0.0437142	0.133464	1.70559	TRUE	FALSE	FALSE	FALSE
2210016F16Rik	26.2909	1.23296	0.0232342	0.0854296	2.04904	FALSE	TRUE	TRUE	FALSE
Zfp995	7.88133	-1.68175	0.029	0.0997039	2.97268	FALSE	TRUE	FALSE	FALSE
2210408I21Rik	395.272	-0.693265	0.00344527	0.020432	1.86641	TRUE	TRUE	TRUE	FALSE
2300009A05Rik	173.662	-0.585706	0.0406946	0.126818	1.40099	TRUE	FALSE	TRUE	FALSE
2310011J03Rik	26.2462	1.85815	0.00100001	0.00775534	2.86083	TRUE	TRUE	TRUE	FALSE
2310015A10Rik	19.5596	-1.47322	0.00554372	0.0291593	3.93705	FALSE	FALSE	FALSE	FALSE
2310022A10Rik	70.941	0.768114	0.0246693	0.0892665	2.36729	TRUE	TRUE	TRUE	FALSE
2310022B05Rik	68.699	1.4576	0.000108194	0.00131326	3.17044	TRUE	TRUE	TRUE	FALSE
Relch	140.743	-0.78559	0.00213049	0.0141582	4.04897	TRUE	FALSE	TRUE	TRUE
Trir	150.952	1.00616	3.62e-05	0.000523907	7.07554	TRUE	TRUE	FALSE	FALSE
Borcs6	46.5955	1.75321	1.41e-05	0.00023881	7.90718	TRUE	TRUE	TRUE	TRUE
Carnmt1	62.9757	-0.997084	0.00407035	0.023216	2.66375	TRUE	FALSE	TRUE	TRUE
Zfp998	4.63451	-2.88335	0.0075967	0.0369896	2.65263	TRUE	FALSE	FALSE	FALSE
2510039O18Rik	104.114	1.25848	9.27e-05	0.00114796	3.60103	TRUE	TRUE	TRUE	FALSE
2610008E11Rik	53.1075	-1.3171	0.000174169	0.00193453	4.4748	TRUE	TRUE	TRUE	FALSE
Ccdc191	127.298	-0.924954	0.00100742	0.0077843	4.4029	TRUE	FALSE	TRUE	TRUE
2610206C17Rik	22.0576	-2.0085	2.9e-05	0.00043531	9.83606	TRUE	FALSE	FALSE	FALSE
Cfap418	283.957	-1.06651	7.04e-08	2.4e-06	11.4333	TRUE	FALSE	FALSE	FALSE
Zfp979	62.2305	-2.67509	2.43e-15	3.16e-13	10.7469	TRUE	FALSE	TRUE	FALSE
2610318N02Rik	1846.72	0.722668	0.000103618	0.00126722	3.17309	FALSE	FALSE	TRUE	FALSE
2610524H06Rik	30.9336	-1.58583	0.000226688	0.00238819	6.48996	TRUE	FALSE	TRUE	TRUE
2700049A03Rik	738.472	-0.495828	0.0237464	0.086731	2.07714	TRUE	FALSE	FALSE	FALSE
2810002D19Rik	25.0567	-1.39138	0.00323052	0.0194924	3.53218	TRUE	FALSE	FALSE	FALSE
2810013P06Rik	20.5919	1.13418	0.0399472	0.125438	2.5215	FALSE	FALSE	FALSE	FALSE
2810021J22Rik	47.2475	-0.94523	0.00981791	0.0450183	2.56748	TRUE	TRUE	TRUE	TRUE
2810025M15Rik	267.131	0.741889	0.00334119	0.0199998	2.60603	TRUE	FALSE	FALSE	FALSE
2810032G03Rik	19.5777	-1.37241	0.0379651	0.120943	1.55301	TRUE	FALSE	FALSE	FALSE
2810408A11Rik	810.151	0.826516	0.00018666	0.0020457	2.46418	FALSE	FALSE	FALSE	FALSE
Rex1bd	9.7919	2.74714	0.00467777	0.0257799	2.94594	FALSE	FALSE	FALSE	FALSE
2810442N19Rik	2.45319	-3.17717	0.0398837	0.125329	2.09072	TRUE	FALSE	FALSE	FALSE
Resf1	79.9271	-0.653514	0.0304	0.102964	2.47347	TRUE	FALSE	TRUE	FALSE
2900026A02Rik	18.1411	1.58367	0.0168769	0.0673402	2.02854	TRUE	TRUE	TRUE	TRUE
2900060B14Rik	4.25768	-3.6356	0.00365811	0.0213863	2.32553	FALSE	FALSE	FALSE	FALSE
2900076A07Rik	7.21461	-1.60498	0.0448294	0.136125	3.76025	FALSE	FALSE	FALSE	FALSE
2900092C05Rik	165.226	-0.91937	0.00200653	0.013539	1.62914	TRUE	TRUE	FALSE	FALSE
Bscl2	103.139	-0.820492	0.00506	0.0272624	2.33837	FALSE	FALSE	FALSE	FALSE
3110021A11Rik	1.28767	-4.78479	0.0431002	NA	1.61993	FALSE	TRUE	FALSE	FALSE
Mir100hg	12.5595	-3.29131	9.72e-06	0.000175388	5.01748	TRUE	FALSE	FALSE	FALSE
Zfp983	6.8874	-2.17716	0.0320059	0.107006	1.34809	TRUE	TRUE	TRUE	TRUE
3110082I17Rik	19.26	1.37397	0.0186287	0.072619	3.35575	TRUE	TRUE	TRUE	TRUE
3632454L22Rik	14.5194	-2.83336	1.28e-05	0.000220154	9.05619	FALSE	FALSE	FALSE	FALSE
3830403N18Rik	10.0637	-2.79227	0.000445659	0.00411973	4.27015	TRUE	TRUE	FALSE	FALSE
3830406C13Rik	303.79	-0.94233	4.89e-05	0.000670437	3.24095	TRUE	TRUE	TRUE	FALSE
Magea9	42.085	-1.14097	0.00256	0.0162714	2.87245	FALSE	FALSE	FALSE	FALSE
Spata6l	900.072	0.507995	0.0449562	0.136294	1.21094	TRUE	FALSE	FALSE	FALSE
4632428C04Rik	16.7617	-8.49329	8.52e-11	5.78e-09	3.68274	FALSE	FALSE	FALSE	FALSE
4833417C18Rik	7.17049	-2.141	0.0110369	0.0489978	2.93946	TRUE	FALSE	FALSE	FALSE
4833420G17Rik	109.034	-0.82967	0.00237623	0.015378	2.53238	TRUE	FALSE	FALSE	FALSE
Phf8-ps	265.772	-1.07277	0.00203248	0.013675	1.43435	FALSE	FALSE	FALSE	FALSE
4921504E06Rik	165.824	-1.02314	0.00146815	0.0105899	1.56259	TRUE	TRUE	TRUE	TRUE
4921509C19Rik	65.0421	-1.11003	0.00674466	0.0338406	3.05748	TRUE	TRUE	TRUE	FALSE
4921511C20Rik	60.5991	-1.91801	5.88e-05	0.00078278	1.28905	FALSE	FALSE	FALSE	FALSE
Tex47	264.804	-0.871398	0.00708545	0.0351328	1.19822	FALSE	TRUE	TRUE	FALSE
4921515E04Rik	21.1733	-1.1458	0.0230533	0.0849345	2.18562	FALSE	FALSE	FALSE	FALSE
4921517D22Rik	141.415	-0.644159	0.00887697	0.0415515	3.79759	TRUE	TRUE	TRUE	TRUE
4921518K17Rik	9.39945	-1.61202	0.0245	0.0887543	5.12305	FALSE	FALSE	FALSE	FALSE
4921524J17Rik	75.4059	-0.62973	0.0271	0.0953821	3.92735	TRUE	TRUE	TRUE	TRUE
4921525O09Rik	190.892	-0.931746	1.02e-05	0.00018255	8.84205	TRUE	FALSE	FALSE	FALSE
4921531C22Rik	257.216	-1.932	5.42e-18	8.44e-16	6.08261	TRUE	FALSE	FALSE	FALSE
4921539E11Rik	708.585	-1.14909	0.000285	0.00287453	1.35921	TRUE	TRUE	TRUE	FALSE
Clec2m	4142.89	-0.987164	0.00100295	0.0077656	1.41375	TRUE	FALSE	TRUE	FALSE
4930401O10Rik	15.9917	-1.2778	0.0385793	0.122476	2.63795	FALSE	FALSE	FALSE	FALSE
4930402F11Rik	10.8436	-2.00678	0.00292142	0.0179784	3.68796	FALSE	FALSE	FALSE	FALSE
4930402K13Rik	34.5433	-1.23625	0.00915329	0.04258	1.31271	FALSE	FALSE	FALSE	FALSE
4930404N11Rik	209.762	1.34957	7.54e-06	0.000141451	2.31652	FALSE	FALSE	TRUE	FALSE
4930405A21Rik	8.66927	2.12273	0.0193277	0.0747075	4.05341	FALSE	FALSE	FALSE	FALSE
4930405J17Rik	23.9424	-1.59396	0.0047987	0.0262623	1.87824	FALSE	FALSE	FALSE	FALSE
4930405O22Rik	21.249	-1.26922	0.0279643	0.0974078	2.17433	FALSE	FALSE	FALSE	FALSE
4930406D18Rik	142.989	-0.653941	0.0457843	0.138103	1.06347	FALSE	FALSE	FALSE	FALSE
4930413F20Rik	48.7139	1.34436	0.00567829	0.0296598	1.60997	FALSE	FALSE	FALSE	FALSE
4930414N06Rik	79.3378	-1.03654	0.000753574	0.00619506	3.92974	FALSE	FALSE	FALSE	FALSE
Spata48	167.936	-0.622993	0.0460223	0.138681	1.0317	TRUE	FALSE	FALSE	FALSE
Tex49	87.4699	0.677929	0.039281	0.124011	1.76445	FALSE	FALSE	FALSE	FALSE
4930423M02Rik	29.1182	-1.35294	0.0025614	0.016278	3.81517	TRUE	FALSE	FALSE	FALSE
4930429F11Rik	18.0341	-1.37675	0.0283214	0.098197	1.19698	FALSE	FALSE	FALSE	FALSE
4930429F24Rik	31.2934	-1.73727	6.77e-05	0.000879381	3.65971	FALSE	FALSE	FALSE	FALSE
Potefam1	575.465	-1.32575	5.66e-07	1.48e-05	2.10682	TRUE	FALSE	FALSE	FALSE
4930430F21Rik	5.7371	-2.00114	0.0424476	0.13075	1.5438	FALSE	FALSE	FALSE	FALSE
4930431F12Rik	20.3087	-2.36802	1.97e-05	0.000312605	3.03586	FALSE	FALSE	FALSE	FALSE
4930431P03Rik	33.8463	-2.41855	2.71e-08	1.05e-06	3.8153	FALSE	FALSE	FALSE	FALSE
Brme1	278.206	0.547766	0.0206785	0.078543	2.03602	TRUE	FALSE	FALSE	FALSE
4930433N12Rik	658.646	-4.41992	4.68e-91	3.86e-88	17.1564	FALSE	FALSE	FALSE	FALSE
4930434J06Rik	32.1199	-1.41279	0.000697932	0.00581498	3.85635	TRUE	FALSE	FALSE	FALSE
4930440C22Rik	34.5479	-1.58663	0.00206739	0.0138399	1.41659	TRUE	FALSE	FALSE	FALSE
4930440I19Rik	39.7179	-1.35454	0.0015	0.0107488	2.02882	TRUE	FALSE	FALSE	FALSE
4930442J19Rik	60.7262	-2.25655	5.64e-10	3.31e-08	3.26865	TRUE	FALSE	FALSE	FALSE
4930444F02Rik	457.532	-1.35586	2.16e-11	1.62e-09	6.1855	FALSE	FALSE	FALSE	FALSE
Semp2l2b	71.8904	-2.49378	6.78e-12	5.67e-10	3.46961	FALSE	FALSE	FALSE	FALSE
4930444M15Rik	25.3006	-1.61415	0.00259219	0.0164248	1.68329	FALSE	FALSE	FALSE	FALSE
4930447C04Rik	71.3329	-1.35355	2.04e-05	0.000321353	3.34844	TRUE	TRUE	TRUE	FALSE
4930447J18Rik	7.83384	-1.57327	0.0478549	0.142932	1.82058	FALSE	FALSE	FALSE	FALSE
4930449E01Rik	28.9432	-0.927245	0.028038	0.097645	6.58924	TRUE	FALSE	FALSE	FALSE
4930449I24Rik	4.84953	-2.8352	0.0229493	0.0846415	0.911119	FALSE	FALSE	TRUE	FALSE
Dnaaf8	198.563	-0.451799	0.0467661	0.140453	2.15557	TRUE	FALSE	FALSE	FALSE
4930451I11Rik	64.7241	0.995647	0.00621551	0.0318883	2.32959	FALSE	FALSE	TRUE	FALSE
4930452G13Rik	142.497	-0.647865	0.0220427	0.0821026	1.51847	TRUE	FALSE	FALSE	FALSE
4930453L07Rik	33.1405	-1.08796	0.0122286	0.0528247	1.8297	FALSE	FALSE	FALSE	FALSE
4930455B14Rik	116.885	-0.801821	0.0167696	0.0670512	1.21511	TRUE	FALSE	FALSE	FALSE
4930455D15Rik	9.35467	-1.67439	0.0398248	0.125212	1.45834	FALSE	FALSE	FALSE	FALSE
4930455F16Rik	79.9037	-0.670446	0.03215	0.107363	1.71254	FALSE	FALSE	FALSE	FALSE
4930456L15Rik	9.36164	-1.92944	0.0333499	0.110137	1.1653	FALSE	FALSE	FALSE	FALSE
4930461G14Rik	33.9919	-1.89936	0.00242	0.0155973	1.07483	TRUE	FALSE	FALSE	FALSE
4930463O16Rik	52.124	-0.701477	0.0409157	0.127346	2.15096	FALSE	FALSE	FALSE	FALSE
4930467D21Rik	29.1956	-1.5359	0.00469818	0.0258594	1.19596	TRUE	FALSE	FALSE	FALSE
Potefam3e	5.1635	-3.51627	0.00201442	0.0135798	2.7529	FALSE	FALSE	FALSE	FALSE
Tex50	340.175	-0.60469	0.0445522	0.135497	1.00589	FALSE	FALSE	TRUE	FALSE
4930470P17Rik	28.9175	-1.41205	0.000829207	0.00667873	4.39839	FALSE	FALSE	FALSE	FALSE
4930473O22Rik	45.317	-1.93171	3.25e-06	6.83e-05	2.13785	FALSE	FALSE	FALSE	FALSE
4930474N05Rik	65.6894	-2.02321	8.87e-10	4.97e-08	4.07768	FALSE	FALSE	TRUE	FALSE
4930479D17Rik	61.3443	-1.20216	0.00789144	0.03805	1.83884	FALSE	FALSE	FALSE	FALSE
4930480E11Rik	25.2339	-1.75252	0.000120935	0.00143228	4.10299	TRUE	TRUE	FALSE	FALSE
4930480G23Rik	17.165	-1.76614	0.00299837	0.018354	1.95037	FALSE	FALSE	FALSE	FALSE
4930483J18Rik	52.4054	1.33831	0.001272	0.00942291	2.43601	TRUE	FALSE	FALSE	FALSE
4930484H19Rik	25.1009	-1.71431	0.000283132	0.00286694	7.2302	FALSE	FALSE	FALSE	FALSE
4930486F22Rik	7.05976	-1.83649	0.0323906	0.107875	1.70169	TRUE	FALSE	FALSE	FALSE
4930488L21Rik	304.264	0.691563	0.0034338	0.0203989	2.29099	FALSE	FALSE	FALSE	FALSE
4930503E14Rik	43.058	-1.25837	0.0100276	0.0457253	1.26166	TRUE	TRUE	TRUE	FALSE
4930503L19Rik	422.531	-0.742172	0.000266668	0.00272897	3.64643	TRUE	TRUE	TRUE	FALSE
4930503O07Rik	3.67398	-2.81629	0.0217577	0.081515	4.5157	FALSE	FALSE	FALSE	FALSE
4930505A04Rik	354.472	-0.681029	0.00791022	0.0381087	1.74196	FALSE	TRUE	FALSE	FALSE
4930511A02Rik	54.6444	-0.985107	0.00335196	0.0200434	2.86092	TRUE	FALSE	FALSE	FALSE
4930511M06Rik	90.7772	-0.688202	0.0274	0.0960155	1.94722	FALSE	FALSE	FALSE	FALSE
4930513D17Rik	66.3236	-1.54894	0.000360849	0.0034905	1.31878	FALSE	FALSE	FALSE	FALSE
4930515L19Rik	21.8601	-2.45858	2.79e-06	6e-05	3.79852	FALSE	FALSE	FALSE	FALSE
4930519D14Rik	42.5689	-1.49253	0.000108603	0.00131609	2.79969	FALSE	FALSE	FALSE	FALSE
4930519F24Rik	13.7035	-1.38136	0.0360693	0.116483	1.27083	TRUE	FALSE	FALSE	FALSE
4930519G04Rik	224.82	-2.01255	6.9e-16	9.71e-14	4.35475	TRUE	TRUE	TRUE	FALSE
4930522H14Rik	198.523	-0.766375	0.0161444	0.0650717	1.3068	FALSE	TRUE	FALSE	FALSE
4930522O17Rik	70.9638	-1.19486	0.000428326	0.00398933	2.73346	TRUE	FALSE	FALSE	FALSE
4930523C07Rik	84.9352	-0.756675	0.0254428	0.0913193	1.93114	TRUE	TRUE	TRUE	FALSE
4930523O13Rik	123.871	-1.26869	2.36e-05	0.000365156	2.25095	FALSE	FALSE	FALSE	FALSE
4930524B17Rik	7.09852	-2.58662	0.0144614	0.0596981	1.15007	FALSE	FALSE	FALSE	FALSE
4930524O08Rik	18.5299	-1.18125	0.0402685	0.126142	2.83685	TRUE	FALSE	FALSE	FALSE
4930525D18Rik	145.776	-1.15737	3.85e-07	1.06e-05	12.0876	FALSE	FALSE	FALSE	FALSE
4930525G20Rik	162.026	-1.1018	1.64e-05	0.000267618	2.95014	FALSE	FALSE	FALSE	FALSE
4930526I15Rik	46.4291	1.42279	0.00096859	0.00757751	3.41324	TRUE	FALSE	FALSE	FALSE
4930528A17Rik	32.9523	-0.888802	0.034228	0.112202	1.815	FALSE	FALSE	FALSE	FALSE
4930528P14Rik	19.0883	-1.57189	0.00990128	0.0452903	1.34447	FALSE	FALSE	FALSE	FALSE
4930529C04Rik	18.1349	-1.7443	0.00135512	0.0099535	4.83113	FALSE	FALSE	FALSE	FALSE
4930529L06Rik	12.0125	-1.93635	0.0043726	0.0245356	1.86523	TRUE	FALSE	FALSE	FALSE
4930532I03Rik	29.8917	-1.81396	0.000274128	0.00279375	2.76208	FALSE	FALSE	FALSE	FALSE
4930533B01Rik	33.8749	-1.78022	3.06e-05	0.000453208	6.82173	FALSE	FALSE	FALSE	FALSE
Tmem269	320.555	-0.70231	0.00174707	0.0121078	3.63585	TRUE	TRUE	TRUE	TRUE
4930543N07Rik	21.3666	-1.36842	0.012001	0.0521147	2.12176	TRUE	FALSE	FALSE	FALSE
4930544D05Rik	405.442	0.486683	0.0213922	0.0805116	2.07725	TRUE	FALSE	FALSE	FALSE
4930544G11Rik	846.145	-0.570793	0.0101673	0.0461799	1.92684	FALSE	TRUE	TRUE	FALSE
4930544M13Rik	3.85271	-2.47549	0.0384602	0.12212	2.12781	TRUE	FALSE	FALSE	FALSE
4930545L23Rik	69.5248	-1.17345	8.48e-05	0.00106233	8.79183	FALSE	FALSE	FALSE	FALSE
4930546C10Rik	5.57607	-3.06108	0.00327466	0.0196805	1.63755	FALSE	FALSE	FALSE	FALSE
4930546K05Rik	11.1139	-2.42922	0.00161833	0.0113981	1.39218	FALSE	FALSE	FALSE	FALSE
4930547E14Rik	42.0308	-1.16412	0.0068986	0.0344442	2.05448	TRUE	FALSE	FALSE	FALSE
Tex46	58.0034	0.902664	0.0345598	0.113033	1.32128	FALSE	FALSE	FALSE	FALSE
4930550C14Rik	183.942	-0.73785	0.0343384	0.112474	0.970064	TRUE	TRUE	TRUE	FALSE
Magea13	118.755	-0.946061	0.000699255	0.0058232	2.66898	TRUE	FALSE	FALSE	FALSE
4930553C11Rik	67.1868	-0.763484	0.0272289	0.0956901	1.59894	FALSE	FALSE	FALSE	FALSE
4930553E22Rik	19.975	-2.2414	0.000232934	0.00243707	1.45554	FALSE	FALSE	FALSE	FALSE
4930554G24Rik	18.195	-1.58589	0.00252117	0.0160696	4.23677	FALSE	FALSE	FALSE	FALSE
4930554I06Rik	33.8251	-1.25085	0.0328986	0.10898	0.987537	TRUE	FALSE	FALSE	FALSE
4930555B11Rik	11.2795	-1.69428	0.0203147	0.0774865	1.20529	FALSE	FALSE	FALSE	FALSE
4930556C24Rik	23.2889	-1.27009	0.0175184	0.069372	1.26321	FALSE	FALSE	FALSE	FALSE
4930556N09Rik	22.1693	-1.45255	0.00285991	0.0176816	3.48669	FALSE	FALSE	FALSE	FALSE
H2al3	156.148	-1.01226	0.00485234	0.0264388	1.20748	FALSE	FALSE	FALSE	FALSE
4930558C23Rik	371.067	-1.38474	1e-08	4.38e-07	3.28959	FALSE	FALSE	TRUE	FALSE
4930558F17Rik	29.6766	-0.927842	0.033328	0.110086	2.20725	FALSE	FALSE	FALSE	FALSE
4930558J18Rik	80.9109	-0.648958	0.0330583	0.109383	1.80251	FALSE	FALSE	FALSE	FALSE
4930562F07Rik	6.45262	-1.99829	0.0215318	0.0809276	7.57401	TRUE	TRUE	FALSE	FALSE
4930563M20Rik	7.50601	-2.0778	0.0131464	0.0558471	2.65169	FALSE	FALSE	FALSE	FALSE
4930563M21Rik	122.38	-2.33247	1.5e-18	2.49e-16	5.23657	FALSE	FALSE	TRUE	FALSE
4930564C03Rik	147.046	-0.655871	0.0398937	0.125338	1.1496	FALSE	FALSE	FALSE	FALSE
4930565N06Rik	45.4192	-2.62152	3.18e-08	1.21e-06	3.6811	FALSE	FALSE	FALSE	FALSE
4930567J20Rik	20.1989	-1.68247	0.000938113	0.00737911	4.58858	TRUE	FALSE	FALSE	FALSE
4930567K12Rik	9.62929	-1.65726	0.0263895	0.0937912	2.79298	FALSE	FALSE	FALSE	FALSE
4930568D16Rik	47.9003	-1.06731	0.0084443	0.0401122	1.54083	FALSE	TRUE	FALSE	TRUE
4930572K03Rik	31.1169	-0.9839	0.0307439	0.104041	2.77954	TRUE	FALSE	FALSE	FALSE
4930572O03Rik	3.17242	-3.56993	0.0114572	0.0503471	3.51379	FALSE	FALSE	FALSE	FALSE
4930577N17Rik	6.59167	-1.91159	0.0392803	0.124011	1.2992	TRUE	FALSE	FALSE	FALSE
4930578E11Rik	37.3936	-0.943714	0.0144506	0.0596819	2.78634	FALSE	FALSE	FALSE	FALSE
4930578I06Rik	379.599	0.588476	0.00329625	0.0197855	3.42126	FALSE	FALSE	FALSE	FALSE
4930579G24Rik	115.103	0.670835	0.0296363	0.101195	1.79234	TRUE	TRUE	TRUE	FALSE
4930579H20Rik	4.69746	-4.60805	0.00131993	0.00974046	2.0194	FALSE	FALSE	FALSE	FALSE
4930584F24Rik	257.036	-1.15183	2.09e-05	0.00032891	2.70598	FALSE	TRUE	FALSE	FALSE
4930593C16Rik	12.5624	1.72697	0.0300421	0.102238	2.08123	FALSE	FALSE	FALSE	FALSE
4930594C11Rik	57.2787	-0.986904	0.00964004	0.044382	2.2781	FALSE	FALSE	FALSE	FALSE
4930595M18Rik	56.3693	-1.90124	1.75e-05	0.000281988	1.78693	FALSE	FALSE	FALSE	FALSE
4930596I21Rik	9.65245	-1.47813	0.039326	0.124117	3.49005	FALSE	FALSE	FALSE	FALSE
4930597G03Rik	6.95325	-2.93149	0.00112062	0.00847293	3.99677	FALSE	FALSE	FALSE	FALSE
4930599N23Rik	9.19476	1.95339	0.0259095	0.0925035	3.02904	TRUE	FALSE	FALSE	FALSE
4931403G20Rik	99.4222	-0.6921	0.0222682	0.0826871	1.46969	TRUE	FALSE	FALSE	FALSE
4931406C07Rik	78.7817	0.791861	0.00737846	0.0361471	5.43557	TRUE	TRUE	TRUE	TRUE
4931408C20Rik	267.523	-0.880543	2.74e-05	0.000416962	5.67535	FALSE	FALSE	FALSE	FALSE
4931408D14Rik	261.291	-0.629402	0.00488248	0.0265529	2.23739	FALSE	FALSE	FALSE	FALSE
Iqca1l	311.616	-0.585211	0.00449095	0.0250051	3.09275	TRUE	FALSE	TRUE	FALSE
Jkampl	275.463	-0.844364	0.000198103	0.00213851	4.48518	TRUE	FALSE	FALSE	FALSE
Potegl	166.883	-1.31603	1.55e-06	3.58e-05	2.48142	TRUE	FALSE	TRUE	FALSE
4931430N09Rik	36.6511	-1.66672	0.000379452	0.00361388	2.07914	FALSE	FALSE	FALSE	FALSE
Fem1al	157.705	0.492815	0.0285925	0.0987216	9.09766	TRUE	FALSE	TRUE	FALSE
Dmtf1l	81.013	-1.84261	3.84e-08	1.41e-06	4.18358	TRUE	FALSE	FALSE	FALSE
4932413F04Rik	48.9409	-2.21559	2.36e-08	9.3e-07	4.99179	FALSE	FALSE	FALSE	FALSE
4932414N04Rik	776.051	-1.06092	4.26e-05	0.000599732	1.81802	TRUE	FALSE	FALSE	FALSE
4932415M13Rik	77.4058	-1.34173	6.3e-06	0.000121123	5.20897	TRUE	FALSE	FALSE	FALSE
Stk35os1	206.267	0.506446	0.0483547	0.143804	1.93344	FALSE	FALSE	FALSE	FALSE
4932416K20Rik	34.3212	-1.75515	0.000208621	0.00222439	2.00354	FALSE	FALSE	FALSE	FALSE
4932429P05Rik	73.4068	-2.18776	1.66e-07	5.12e-06	2.27059	TRUE	TRUE	TRUE	FALSE
4932435O22Rik	21.0208	-2.9694	1.04e-07	3.42e-06	3.62075	FALSE	FALSE	FALSE	FALSE
4932438A13Rik	2589.51	-1.08245	2.17e-06	4.86e-05	3.58293	TRUE	TRUE	TRUE	TRUE
4933400A11Rik	138.495	-1.0383	0.00222526	0.0146298	1.62687	FALSE	FALSE	FALSE	FALSE
4933400C23Rik	2.98697	-4.20831	0.00807125	0.0386799	4.8808	FALSE	FALSE	FALSE	FALSE
4933400F21Rik	139.668	-1.48648	6.46e-09	3.01e-07	4.46675	FALSE	FALSE	FALSE	FALSE
4933400L20Rik	37.9732	-0.933088	0.0170236	0.0678161	3.23348	TRUE	FALSE	FALSE	FALSE
4933401H06Rik	111.313	-1.91111	3.34e-08	1.26e-06	2.43097	FALSE	FALSE	FALSE	FALSE
4933402D24Rik	31.5685	-1.08388	0.0301128	0.102418	1.48662	FALSE	TRUE	TRUE	FALSE
4933402J10Rik	272.555	-0.715071	0.0272051	0.095649	1.06456	FALSE	FALSE	FALSE	FALSE
4933402N22Rik	20.8842	-1.53074	0.00470308	0.02587	1.81167	TRUE	FALSE	FALSE	FALSE
4933404G15Rik	241.562	-1.26724	1.19e-05	0.000207157	2.21594	FALSE	FALSE	FALSE	FALSE
4933404O12Rik	530.762	-1.81638	1.75e-25	4.15e-23	22.0472	TRUE	FALSE	FALSE	FALSE
4933405E24Rik	12.9832	-1.3905	0.021825	0.0816427	5.65473	FALSE	FALSE	FALSE	FALSE
4933405O20Rik	238.122	-0.929574	0.021839	0.0816427	0.936827	TRUE	TRUE	TRUE	FALSE
4933406C10Rik	52.1158	-1.47099	4.56e-05	0.000633067	3.39004	FALSE	FALSE	FALSE	FALSE
4933406F09Rik	36.5537	-1.15297	0.00669841	0.0336835	1.60663	TRUE	FALSE	FALSE	FALSE
Terb2	29.6696	-1.20263	0.0118586	0.0516128	1.64488	TRUE	TRUE	TRUE	TRUE
4933406J10Rik	20.6158	-1.67675	0.00186026	0.0127492	4.04659	FALSE	FALSE	FALSE	FALSE
4933406K04Rik	110.984	-0.932882	0.00135443	0.00995264	2.34381	FALSE	FALSE	FALSE	FALSE
Mgat4f	226.26	-1.09255	4.99e-06	9.83e-05	3.2825	FALSE	FALSE	FALSE	FALSE
4933407G14Rik	1.28767	-4.78479	0.0431002	NA	1.61993	FALSE	FALSE	FALSE	FALSE
4933407K13Rik	11.9745	-1.65285	0.0142998	0.0592714	1.85289	FALSE	FALSE	FALSE	FALSE
4933408J17Rik	16.7714	-1.17599	0.0282302	0.0980213	3.56045	FALSE	TRUE	FALSE	FALSE
4933409G03Rik	427.862	-0.581504	0.00832585	0.0396802	1.806	TRUE	FALSE	TRUE	FALSE
4933411G06Rik	94.1151	-0.829534	0.0111345	0.0493124	1.62714	FALSE	TRUE	FALSE	FALSE
4933411K16Rik	3668.85	0.372883	0.0378248	0.120634	1.88441	TRUE	TRUE	TRUE	FALSE
4933412E12Rik	59.941	0.92134	0.0166412	0.0666303	2.31259	TRUE	FALSE	FALSE	FALSE
4933412E24Rik	55.4734	0.835738	0.034926	0.113972	1.6993	FALSE	FALSE	TRUE	FALSE
4933413J09Rik	15.44	-1.22926	0.0352925	0.114714	3.07999	TRUE	FALSE	FALSE	FALSE
4933417A18Rik	353.605	-0.751045	0.022095	0.0822091	1.1005	TRUE	FALSE	TRUE	FALSE
4933421I07Rik	49.1404	-1.96193	8.5e-07	2.12e-05	2.67982	TRUE	TRUE	TRUE	FALSE
4933421O10Rik	152.112	1.00086	0.000272746	0.00278534	3.01755	FALSE	FALSE	FALSE	FALSE
4933427E13Rik	8.73348	-1.80435	0.0343139	0.11242	2.11738	TRUE	FALSE	FALSE	FALSE
Mfsd13b	450.577	-0.962998	5.49e-08	1.94e-06	14.0496	TRUE	FALSE	FALSE	FALSE
4933428C19Rik	4.38351	-2.24604	0.0442001	0.134671	1.59218	FALSE	FALSE	FALSE	FALSE
4933428G20Rik	46.8125	0.843086	0.0195846	0.0754311	6.14391	FALSE	TRUE	FALSE	FALSE
4933429K18Rik	12.1645	-1.69847	0.0264631	0.0939759	0.977021	FALSE	FALSE	FALSE	FALSE
4933429O19Rik	53.1275	-1.614	1.29e-06	3.07e-05	5.97423	TRUE	FALSE	FALSE	FALSE
4933430H16Rik	23.4294	-1.24224	0.00984158	0.045091	2.49423	FALSE	FALSE	FALSE	FALSE
4933431G14Rik	57.4586	-0.959985	0.0163926	0.0657871	1.99231	FALSE	FALSE	FALSE	FALSE
4933432I09Rik	45.5717	-0.809013	0.0354409	0.115067	1.92776	FALSE	FALSE	FALSE	FALSE
4933433G19Rik	10.6117	-1.76836	0.0146946	0.0604302	1.51851	FALSE	FALSE	FALSE	FALSE
4933433H22Rik	41.8253	-0.780437	0.0345956	0.113097	2.27661	FALSE	FALSE	FALSE	FALSE
4933436H12Rik	36.1365	-1.78012	1.33e-05	0.000228097	3.39227	FALSE	FALSE	FALSE	FALSE
4933436I01Rik	105.721	-1.75753	4.74e-06	9.39e-05	1.8244	FALSE	FALSE	FALSE	FALSE
4933438K21Rik	15.5233	-2.31032	7.14e-05	0.000919511	5.03115	FALSE	FALSE	FALSE	FALSE
4933440M02Rik	293.263	-1.08462	2.43e-08	9.5e-07	14.2321	FALSE	TRUE	FALSE	FALSE
5031426D15Rik	10.7812	-3.7877	0.000113724	0.00136156	3.03415	FALSE	FALSE	FALSE	FALSE
5031439G07Rik	377.23	0.751519	0.000166651	0.00187023	4.56563	TRUE	TRUE	TRUE	FALSE
5033403F01Rik	13.0281	-1.63204	0.0118387	0.0515782	2.4295	FALSE	FALSE	FALSE	FALSE
5430416N02Rik	16.0193	-1.40865	0.014084	0.0586298	2.74723	FALSE	FALSE	FALSE	FALSE
5430427M07Rik	4.05493	-3.24619	0.0148525	0.0609637	1.21554	TRUE	FALSE	FALSE	FALSE
5530401A14Rik	1.28767	-4.78479	0.0431002	NA	1.61993	TRUE	TRUE	FALSE	FALSE
5730409E04Rik	10.3376	2.83238	0.00267074	0.0167934	5.22761	TRUE	TRUE	TRUE	FALSE
5730480H06Rik	10.4062	-1.71845	0.0184698	0.0721657	3.24567	TRUE	FALSE	FALSE	FALSE
Fam241a	80.0514	-0.59354	0.0412323	0.128079	2.19231	TRUE	TRUE	TRUE	TRUE
5830417I10Rik	98.2239	-0.66172	0.0284517	0.0984515	1.95958	TRUE	FALSE	FALSE	FALSE
6030498E09Rik	2.37514	-3.74489	0.043281	0.132586	1.17531	TRUE	TRUE	TRUE	FALSE
6330415B21Rik	2.6256	-5.80584	0.00104593	0.00804438	2.81401	FALSE	FALSE	FALSE	FALSE
Spef1l	200.994	0.603707	0.0275679	0.0965449	1.67773	TRUE	FALSE	TRUE	FALSE
6530411M01Rik	2.87007	-3.10124	0.0451946	0.136754	2.86172	FALSE	FALSE	FALSE	FALSE
6720468P15Rik	17.3521	-1.63068	0.00276068	0.0172157	4.77246	TRUE	FALSE	FALSE	FALSE
6720489N17Rik	3.2322	-3.06201	0.037849	0.120689	1.41301	FALSE	TRUE	TRUE	FALSE
6820431F20Rik	33.8615	-2.34834	2.97e-07	8.48e-06	4.49717	FALSE	FALSE	FALSE	FALSE
8430429K09Rik	19.6822	1.23597	0.030544	0.103498	2.7906	TRUE	FALSE	FALSE	FALSE
9030404E10Rik	14.8415	-7.34088	2.13e-08	8.44e-07	4.69088	FALSE	FALSE	FALSE	FALSE
Armh3	46.3649	0.949487	0.00970162	0.0445677	5.98801	TRUE	FALSE	TRUE	TRUE
Cstdc2	30.3997	-1.79026	0.00142406	0.0103535	1.39747	TRUE	TRUE	FALSE	FALSE
Cfap300	239.355	-0.45489	0.0329497	0.109087	2.62912	TRUE	TRUE	TRUE	FALSE
9330102E08Rik	555.577	-1.09901	4.15e-07	1.13e-05	3.55275	FALSE	FALSE	FALSE	FALSE
9330117O12Rik	11.1047	-3.82051	1.21e-06	2.9e-05	5.07885	FALSE	FALSE	FALSE	FALSE
9430015G10Rik	156.092	-0.708966	0.00300067	0.0183616	2.85361	TRUE	TRUE	TRUE	TRUE
9430021M05Rik	13.6223	-8.19373	6e-10	3.48e-08	4.28951	TRUE	FALSE	FALSE	FALSE
9530002B09Rik	13.8433	-1.61121	0.00995049	0.0454393	2.52108	FALSE	FALSE	TRUE	FALSE
9530059O14Rik	7.57231	-3.55033	0.000434343	0.00403886	2.68768	TRUE	FALSE	FALSE	FALSE
9530068E07Rik	252.301	1.01306	1.17e-05	0.000204066	4.48084	TRUE	TRUE	TRUE	TRUE
9530077C05Rik	332.603	-0.540636	0.00546075	0.028828	3.65126	TRUE	TRUE	TRUE	FALSE
Zfp976	18.0708	-1.73593	0.00540071	0.0285652	3.93511	TRUE	TRUE	TRUE	FALSE
9930021J03Rik	415.239	-0.75067	0.00354088	0.0208489	2.49412	TRUE	TRUE	TRUE	FALSE
A230009B12Rik	12.9294	-3.15683	0.000228586	0.00240175	3.24876	TRUE	FALSE	FALSE	FALSE
A230028O05Rik	2.41259	-3.88407	0.0215519	0.0809716	4.00463	TRUE	FALSE	FALSE	FALSE
Washc4	76.506	-1.25716	0.000322849	0.00317799	2.85453	TRUE	TRUE	TRUE	TRUE
A330023F24Rik	17.8264	-2.54035	1.46e-05	0.000246055	3.58187	TRUE	FALSE	FALSE	FALSE
A330048O09Rik	1.24334	-4.7462	0.0468024	NA	1.629	FALSE	FALSE	FALSE	FALSE
A630066F11Rik	87.8811	-0.708801	0.026777	0.094663	1.75663	TRUE	FALSE	FALSE	FALSE
A730017L22Rik	5.26121	-2.99938	0.00794722	0.0382396	2.59368	FALSE	FALSE	FALSE	FALSE
A730082K24Rik	7.44819	-7.32839	5.79e-07	1.51e-05	1.7703	TRUE	FALSE	FALSE	FALSE
Btbd8	109.752	-0.596646	0.0264269	0.093905	3.28093	FALSE	FALSE	TRUE	FALSE
A930005H10Rik	7.07376	3.29734	0.00893849	0.0417379	3.71333	FALSE	FALSE	FALSE	FALSE
A930007I19Rik	10.4997	-2.01438	0.00773634	0.0374587	1.87972	FALSE	FALSE	FALSE	FALSE
A930013F10Rik	7.98006	-2.3419	0.00596012	0.0308617	2.21645	FALSE	FALSE	FALSE	FALSE
A930018P22Rik	73.1874	0.729187	0.0153252	0.0625771	5.95826	TRUE	TRUE	TRUE	TRUE
A930019D19Rik	4.15639	-5.49531	0.000575125	0.00500379	2.13578	FALSE	FALSE	FALSE	FALSE
AA414768	18.3532	1.25639	0.03409	0.111856	3.02153	FALSE	FALSE	FALSE	TRUE
AA467197	404.218	-0.532894	0.0428038	0.131543	1.19873	TRUE	TRUE	FALSE	FALSE
Aadacl3	3.0177	-4.99624	0.00301598	0.0184296	2.31849	TRUE	TRUE	TRUE	FALSE
Aamp	1146.8	0.853913	2.66e-07	7.69e-06	7.51093	TRUE	FALSE	TRUE	FALSE
Aard	254.524	1.00485	3.12e-06	6.6e-05	6.30351	TRUE	FALSE	FALSE	FALSE
Aarsd1	43.0838	0.835665	0.0286663	0.0988581	3.73826	FALSE	TRUE	FALSE	FALSE
Aasdhppt	166.851	-0.933492	0.000479291	0.00436074	2.19962	TRUE	TRUE	TRUE	FALSE
Abca14	637.062	-0.993836	3.81e-08	1.4e-06	6.37933	TRUE	FALSE	FALSE	FALSE
Abca15	358.892	-1.4866	3.28e-14	3.84e-12	12.3771	FALSE	FALSE	FALSE	FALSE
Abca16	631.89	-1.54097	3.08e-13	3.15e-11	4.74431	TRUE	FALSE	FALSE	FALSE
Abca17	367.292	-0.781832	3.38e-05	0.000494535	5.76154	FALSE	FALSE	FALSE	FALSE
Abca3	49.0898	0.93718	0.0480038	0.143118	1.33838	TRUE	TRUE	TRUE	FALSE
Abca5	335.884	-0.599882	0.00559905	0.0293476	2.4866	TRUE	TRUE	TRUE	TRUE
Abca6	41.3178	1.75877	0.000150552	0.00172081	2.94362	TRUE	TRUE	FALSE	TRUE
Abca8b	8.57602	-1.71348	0.0464479	0.139722	1.48445	TRUE	TRUE	FALSE	FALSE
Abca9	121.912	-0.809634	0.000871991	0.00696024	6.24983	TRUE	TRUE	FALSE	FALSE
Abcb11	11.0081	-2.11628	0.00191443	0.0130636	3.51372	TRUE	TRUE	TRUE	TRUE
Abcb6	175.976	0.953535	0.00017478	0.00194007	3.18405	TRUE	FALSE	FALSE	FALSE
Abcb9	124.97	1.0461	0.00224301	0.0146972	2.17328	TRUE	TRUE	FALSE	FALSE
Abcc12	589.455	-0.5193	0.0105417	0.0474194	2.40885	TRUE	TRUE	TRUE	FALSE
Abcc4	22.4285	1.5083	0.00530498	0.0281776	4.64544	TRUE	TRUE	TRUE	FALSE
Abce1	507.172	-0.84683	0.00032161	0.0031676	2.04205	TRUE	TRUE	TRUE	TRUE
Abcf2	830.681	0.451986	0.00605074	0.0312096	5.94229	TRUE	TRUE	TRUE	FALSE
Abcg2	176.501	-0.756391	0.00169447	0.0118094	3.28736	FALSE	TRUE	FALSE	FALSE
Abhd13	61.863	-0.773003	0.0211332	0.0797448	1.90054	TRUE	TRUE	TRUE	TRUE
Abhd17a	363.055	1.23135	5.29e-09	2.51e-07	4.97585	TRUE	TRUE	FALSE	FALSE
Abhd17b	405.827	-0.677577	0.00415018	0.0235549	1.83657	TRUE	TRUE	TRUE	FALSE
Abhd2	601.176	0.574794	0.002644	0.0166683	3.81072	TRUE	TRUE	TRUE	FALSE
Abhd8	511.897	1.28125	2.66e-13	2.77e-11	31.3727	TRUE	FALSE	TRUE	FALSE
Abl1	530.171	0.489056	0.0232473	0.0854492	1.8915	TRUE	TRUE	TRUE	FALSE
Abr	59.1348	0.741117	0.0429704	0.132008	2.09356	TRUE	TRUE	TRUE	FALSE
Abtb2	45.3391	1.84226	1.59e-05	0.000261693	4.49299	TRUE	TRUE	TRUE	FALSE
Acaa2	77.5332	1.46455	3.96e-05	0.000561219	2.90808	FALSE	TRUE	TRUE	FALSE
Acaca	273.987	-0.517754	0.0203153	0.0774865	2.82586	TRUE	TRUE	TRUE	FALSE
Acadl	80.1817	1.03312	0.00184785	0.0126843	3.25081	TRUE	TRUE	FALSE	TRUE
Acads	28.725	2.41821	1.59e-05	0.000261693	4.87615	TRUE	TRUE	TRUE	FALSE
Acadvl	96.6035	0.797337	0.00527288	0.0280415	3.43783	TRUE	TRUE	FALSE	FALSE
Acat2	1446	-5.01452	8.92e-126	1.1e-122	6.38186	TRUE	TRUE	TRUE	FALSE
Acat3	2344.56	-5.04495	2.44e-123	2.64e-120	6.44551	TRUE	FALSE	TRUE	FALSE
Acbd5	158.816	-0.684898	0.00327076	0.0196805	4.27828	TRUE	TRUE	TRUE	TRUE
Acbd6	498.42	0.60456	0.00204381	0.0137299	3.10381	TRUE	FALSE	TRUE	FALSE
Ace	1961.34	0.656298	1.66e-05	0.000271165	9.97018	TRUE	TRUE	TRUE	TRUE
Ace3	276.824	0.465851	0.0341502	0.112011	2.2457	FALSE	TRUE	FALSE	FALSE
Acer3	72.6014	-1.04559	0.00140635	0.0102342	2.44228	TRUE	TRUE	TRUE	TRUE
Ache	6.21153	-5.17665	7.67e-05	0.000973146	5.01064	FALSE	FALSE	FALSE	FALSE
Acly	243.236	0.718653	0.00409148	0.0233058	2.07749	TRUE	TRUE	TRUE	TRUE
Aco2	517.214	0.493942	0.0248935	0.08984	2.18134	TRUE	TRUE	TRUE	FALSE
Acot10	131.683	-1.33072	2.98e-06	6.33e-05	2.63514	TRUE	TRUE	FALSE	FALSE
Acot7	1292.73	1.20042	2.25e-09	1.16e-07	3.67021	FALSE	FALSE	TRUE	FALSE
Acot9	185.237	-1.15693	0.00249133	0.0159263	1.34859	FALSE	TRUE	FALSE	FALSE
Acp1	138.678	-0.651557	0.0198276	0.0760623	1.8297	TRUE	TRUE	TRUE	FALSE
Acrbp	1199.91	0.575687	0.00277592	0.017277	3.14847	FALSE	FALSE	FALSE	FALSE
Acrv1	832.88	-0.728848	0.0283633	0.0982636	0.993782	TRUE	TRUE	TRUE	TRUE
Acsbg1	565.708	1.18319	3.2e-06	6.75e-05	2.46446	FALSE	FALSE	TRUE	FALSE
Acsbg2	902.495	0.826845	7.62e-05	0.000968396	2.79453	FALSE	TRUE	FALSE	FALSE
Acsf2	20.5001	1.70152	0.00520634	0.0278331	2.19965	TRUE	TRUE	TRUE	FALSE
Acsl6	280.022	0.795538	0.000324529	0.00319089	4.37105	TRUE	TRUE	TRUE	FALSE
Acta2	117.771	0.757338	0.0111498	0.0493599	2.5486	TRUE	TRUE	TRUE	TRUE
Actb	2299.72	0.825878	0.000148137	0.00170017	3.85366	TRUE	TRUE	TRUE	TRUE
Actbl2	1.28767	-4.78479	0.0431002	NA	1.61993	TRUE	TRUE	TRUE	TRUE
Actg1	961.332	0.673249	3.01e-05	0.000447668	10.9413	TRUE	FALSE	TRUE	FALSE
Actg2	810.519	0.84156	3.94e-05	0.000559456	2.84137	FALSE	FALSE	FALSE	FALSE
Actl7b	1791.31	1.20894	1.53e-09	8.12e-08	4.03888	FALSE	FALSE	FALSE	FALSE
Actl9	1337.67	0.451561	0.03615	0.116646	1.36698	FALSE	FALSE	FALSE	FALSE
Actn1	28.0875	1.01861	0.0300043	0.102169	3.34586	TRUE	TRUE	TRUE	FALSE
Actn4	184.056	0.75323	0.00133796	0.00985253	4.46216	TRUE	TRUE	TRUE	FALSE
Actr1a	1005.16	0.57229	0.000364649	0.00350966	7.07766	TRUE	TRUE	TRUE	FALSE
Actr6	130.267	-1.39236	1.24e-06	2.97e-05	2.73221	TRUE	TRUE	TRUE	FALSE
Acvr2a	141.244	-0.659061	0.0113617	0.0500243	2.20584	TRUE	TRUE	TRUE	FALSE
Acvrl1	7.90515	2.88964	0.00883749	0.0414339	4.62855	TRUE	TRUE	TRUE	FALSE
Acy1	5.18288	2.85416	0.0328577	0.108865	3.37486	FALSE	TRUE	TRUE	FALSE
Acyp1	476.011	-0.673347	0.0165263	0.0662164	1.15065	TRUE	TRUE	FALSE	FALSE
Adal	53.8326	-1.13749	0.00108852	0.00828359	2.80621	TRUE	TRUE	TRUE	FALSE
Adam10	134.682	0.600288	0.0235473	0.0862769	2.40386	TRUE	TRUE	TRUE	TRUE
Adam18	536.738	-0.784498	0.000182522	0.00201107	2.43283	TRUE	FALSE	FALSE	FALSE
Adam1b	362.114	-0.487804	0.0288394	0.0993561	1.94602	TRUE	TRUE	TRUE	FALSE
Adam20	161.51	-1.08156	0.000305209	0.00303542	1.84816	TRUE	TRUE	FALSE	FALSE
Adam24	576.881	-1.22985	2.76e-05	0.000419021	1.8769	TRUE	TRUE	TRUE	FALSE
Adam25	128.568	-1.06514	0.00352993	0.0208127	1.56499	FALSE	FALSE	FALSE	TRUE
Adam26a	169.708	-0.820899	0.0194442	0.0750237	1.32092	FALSE	FALSE	FALSE	FALSE
Adam26b	64.2073	-0.95293	0.00930129	0.0431193	2.2627	FALSE	FALSE	FALSE	FALSE
Adam29	273.567	-1.44495	0.000131125	0.00153586	1.3703	FALSE	FALSE	TRUE	FALSE
Adam3	4438.18	-0.706165	0.00570869	0.0297826	1.43634	TRUE	FALSE	FALSE	FALSE
Adam34	67.3545	-1.1649	0.0011949	0.00894366	2.0536	FALSE	FALSE	FALSE	FALSE
Adam39	123.552	-0.786554	0.010856	0.0484553	1.62324	FALSE	FALSE	FALSE	FALSE
Adam4	206.275	-0.713011	0.00647339	0.0328126	2.1949	FALSE	FALSE	FALSE	FALSE
Adam5	4614.86	-0.765205	0.00227862	0.0148295	1.59407	TRUE	FALSE	TRUE	FALSE
Adam6a	333.8	-0.770084	0.000166132	0.00186561	4.42562	FALSE	FALSE	FALSE	FALSE
Adam6b	264.949	-0.642994	0.00748667	0.0365464	2.49566	FALSE	FALSE	FALSE	FALSE
Adamts19	8.41048	-1.75288	0.0214395	0.0806597	2.61081	TRUE	TRUE	TRUE	FALSE
Adamts9	20.3178	-1.38995	0.0170577	0.0679363	2.00681	TRUE	TRUE	TRUE	FALSE
Adamtsl2	4.81026	-1.99745	0.0474641	0.141933	4.67383	TRUE	FALSE	TRUE	FALSE
Adamtsl3	11.3589	-1.77521	0.00673896	0.0338219	3.40536	TRUE	TRUE	FALSE	TRUE
Adat3	41.07	1.33257	0.00261172	0.0165129	3.51675	TRUE	TRUE	TRUE	FALSE
Adck2	18.9842	1.44827	0.0135718	0.0571713	3.87714	TRUE	TRUE	TRUE	FALSE
Coq8a	63.827	0.931458	0.00853435	0.0403737	2.61225	TRUE	FALSE	TRUE	TRUE
Coq8b	49.7706	1.38853	0.000378983	0.00361388	3.79728	TRUE	FALSE	TRUE	FALSE
Adck5	39.8197	1.03242	0.00939112	0.0433957	5.12851	FALSE	FALSE	FALSE	FALSE
Adcy10	1760.7	-0.59408	0.00135989	0.00996737	2.88858	TRUE	FALSE	TRUE	FALSE
Adcy9	57.4527	0.948202	0.019691	0.0757734	1.52032	FALSE	TRUE	TRUE	FALSE
Adgb	442.393	-0.645176	0.00180047	0.0124083	3.37713	TRUE	TRUE	FALSE	FALSE
Adgra1	2.73693	-3.95597	0.0252724	0.0908473	1.50666	TRUE	FALSE	TRUE	FALSE
Adgrb1	28.3135	-0.917979	0.045301	0.136979	2.13027	TRUE	FALSE	TRUE	FALSE
Adgrb2	42.7684	-3.34805	2.41e-12	2.19e-10	4.5357	TRUE	FALSE	FALSE	FALSE
Adgrv1	197.896	-1.42216	2.91e-11	2.13e-09	7.49656	TRUE	FALSE	FALSE	FALSE
Adh1	35.7017	2.64908	2.94e-05	0.000439443	2.4334	TRUE	TRUE	TRUE	FALSE
Adipoq	78.8814	-0.946123	0.00134112	0.00986737	4.94312	FALSE	TRUE	TRUE	FALSE
Adipor1	340.527	0.916431	0.000147678	0.00169692	3.89844	FALSE	TRUE	TRUE	FALSE
Adk	89.2275	-0.651569	0.0161467	0.0650717	4.66117	TRUE	TRUE	TRUE	TRUE
Adora1	133.022	0.694948	0.00777227	0.0376069	3.10936	TRUE	TRUE	TRUE	FALSE
Adprh	117.816	1.79984	4.06e-08	1.48e-06	4.16549	TRUE	TRUE	FALSE	FALSE
Adprs	11.1484	1.77246	0.0256991	0.0919419	3.27774	TRUE	FALSE	FALSE	FALSE
Grk2	39.9785	1.51443	0.000563047	0.00492514	4.34973	TRUE	FALSE	TRUE	FALSE
Grk3	266.709	-0.696233	0.0161883	0.0651638	1.87156	TRUE	FALSE	TRUE	FALSE
Adrm1	177.769	1.85469	1.91e-12	1.8e-10	5.10534	FALSE	FALSE	TRUE	FALSE
Adsl	91.2077	1.69572	6.35e-08	2.2e-06	5.24225	TRUE	TRUE	TRUE	FALSE
Adtrp	104.505	-1.26073	0.00153299	0.0109496	1.87293	TRUE	TRUE	TRUE	FALSE
Aebp2	151.463	-0.509679	0.0336022	0.110717	2.17291	TRUE	TRUE	TRUE	TRUE
Tle5	175.028	1.46411	3.55e-09	1.75e-07	5.74868	FALSE	FALSE	TRUE	FALSE
Semp2l2a	463.177	-1.60151	1.34e-15	1.81e-13	4.90635	TRUE	FALSE	FALSE	FALSE
Aff1	48.4997	1.18556	0.00816526	0.0390261	1.65365	TRUE	TRUE	TRUE	TRUE
Aff4	681.322	-0.583707	0.00351003	0.0207166	3.44818	TRUE	TRUE	TRUE	TRUE
Afg3l1	144.361	1.28385	2.43e-06	5.35e-05	4.80264	TRUE	TRUE	TRUE	FALSE
Afg3l2	178.351	0.744479	0.00349842	0.0206687	3.01004	TRUE	TRUE	TRUE	FALSE
Afm	9.84122	-4.75383	2.96e-06	6.29e-05	3.06935	TRUE	TRUE	TRUE	FALSE
Agap3	70.3746	1.20769	0.000141911	0.00164221	7.15077	TRUE	TRUE	TRUE	FALSE
Agbl3	480.332	-0.987759	2.23e-06	4.98e-05	4.64806	TRUE	TRUE	TRUE	TRUE
Agfg2	75.6036	0.722933	0.041667	0.129035	1.73928	TRUE	TRUE	TRUE	FALSE
Ago3	78.3404	-1.05901	0.00278887	0.0173386	1.62316	TRUE	TRUE	TRUE	FALSE
Agpat3	1305.53	0.551349	0.000284339	0.00287412	15.4476	TRUE	TRUE	TRUE	FALSE
Gpat4	2862.21	0.425372	0.0143604	0.0594485	2.30928	TRUE	TRUE	TRUE	TRUE
Gpat3	111.386	-0.977411	0.000109539	0.0013265	5.02353	TRUE	FALSE	TRUE	FALSE
Agr3	10.9723	-1.52217	0.0347504	0.113506	1.51043	TRUE	TRUE	FALSE	TRUE
Agt	626.713	0.893353	0.00597081	0.0309078	1.28039	FALSE	TRUE	FALSE	FALSE
Agtr1b	6.95812	-2.66989	0.00966852	0.0444511	1.99186	TRUE	FALSE	TRUE	FALSE
Agtrap	137.062	0.61639	0.0225497	0.0833989	2.33381	TRUE	TRUE	TRUE	FALSE
Ahctf1	2305.19	-0.757056	4.36e-06	8.76e-05	5.77412	TRUE	TRUE	TRUE	TRUE
Ahcy	48.0643	1.1918	0.00607075	0.0312941	2.02341	TRUE	TRUE	TRUE	FALSE
Ahcyl1	333.494	-0.419241	0.0218316	0.0816427	6.81522	TRUE	TRUE	TRUE	TRUE
Ahsa1	110.126	1.41284	2.29e-05	0.000356782	3.03792	TRUE	TRUE	FALSE	FALSE
Igsf9b	20.2188	-1.62146	0.0269162	0.095	1.25475	TRUE	FALSE	TRUE	FALSE
AI429214	279.898	-0.588347	0.00765718	0.0371925	2.32964	TRUE	TRUE	TRUE	FALSE
AI506816	4.90824	4.78681	0.00116491	0.00876087	5.27628	TRUE	FALSE	FALSE	FALSE
AI597479	138.886	-1.41376	5.18e-08	1.85e-06	4.18584	TRUE	TRUE	TRUE	FALSE
AI837181	116.924	1.57767	3.34e-08	1.26e-06	5.71449	TRUE	FALSE	TRUE	FALSE
Spindoc	138.95	0.620114	0.0254795	0.0913829	2.01892	TRUE	TRUE	TRUE	FALSE
AI987944	244.922	-1.40293	3.84e-07	1.06e-05	2.57173	TRUE	TRUE	TRUE	FALSE
Aifm3	12.4167	2.4318	0.00423008	0.0239199	2.08456	TRUE	TRUE	TRUE	TRUE
Aimp2	46.4407	1.15075	0.00708266	0.0351328	2.15732	FALSE	TRUE	FALSE	FALSE
Aip	33.3558	1.52751	0.000906642	0.00718052	5.3577	TRUE	TRUE	TRUE	TRUE
Ajuba	53.501	0.872355	0.0121884	0.0526904	4.58176	TRUE	TRUE	TRUE	FALSE
Ak1	723.452	0.575704	0.00479382	0.0262522	2.40317	TRUE	TRUE	TRUE	FALSE
Ak2	283.604	0.550854	0.0223898	0.082949	1.93978	TRUE	TRUE	TRUE	TRUE
Ak4	24.7278	-0.981049	0.0384223	0.122022	2.33789	TRUE	TRUE	TRUE	FALSE
Ak8	755.278	0.396026	0.0425367	0.130925	1.80771	FALSE	FALSE	FALSE	FALSE
Akap1	2413	0.383392	0.0313391	0.105469	2.40707	TRUE	TRUE	TRUE	TRUE
Akap11	347.589	-0.781287	0.000562821	0.00492514	2.78937	TRUE	TRUE	TRUE	TRUE
Akap17b	59.7291	-1.19794	0.000187644	0.00205386	5.42457	TRUE	TRUE	TRUE	FALSE
Akap3	4322.36	0.347496	0.0484275	0.143964	1.95135	TRUE	FALSE	TRUE	FALSE
Akap6	37.1344	-1.25805	0.00522698	0.0278989	2.18726	TRUE	TRUE	TRUE	TRUE
Akap8	163.495	-0.536458	0.0446799	0.135861	1.66701	TRUE	TRUE	TRUE	FALSE
Akap9	383.294	-1.57405	6.24e-07	1.6e-05	4.11965	TRUE	TRUE	TRUE	FALSE
Akirin1	253.541	0.541723	0.0291778	0.100082	1.78797	TRUE	TRUE	TRUE	FALSE
Akirin2	376.551	0.565518	0.0133003	0.0562742	2.16913	TRUE	TRUE	TRUE	FALSE
Akr1a1	273.932	0.766355	0.00117528	0.00882733	3.14354	TRUE	FALSE	FALSE	FALSE
Akr1b7	16.2289	-1.26782	0.0230252	0.0848492	2.68005	TRUE	TRUE	FALSE	FALSE
Akr7a5	77.8709	0.744166	0.0234831	0.0861146	2.44352	TRUE	FALSE	TRUE	TRUE
Akt1	120.628	0.877939	0.00259273	0.0164248	3.09123	TRUE	TRUE	TRUE	FALSE
Akt2	193.3	0.685152	0.00164263	0.011525	7.16513	TRUE	TRUE	TRUE	FALSE
Alad	86.1814	0.85348	0.00344939	0.0204493	4.98753	FALSE	TRUE	TRUE	FALSE
Aldh16a1	29.6076	1.13626	0.0125045	0.0537081	5.23475	TRUE	TRUE	FALSE	FALSE
Aldh18a1	25.5018	1.38039	0.00874187	0.0410747	2.63942	TRUE	TRUE	TRUE	FALSE
Aldh1a1	818.963	0.874603	0.00174092	0.0120748	1.86503	TRUE	TRUE	TRUE	TRUE
Aldh1a2	71.9825	1.18821	0.00255655	0.0162591	2.45727	TRUE	TRUE	TRUE	FALSE
Aldh1b1	58.3604	1.40909	0.000801347	0.00650132	2.46184	FALSE	TRUE	TRUE	FALSE
Aldh1l1	209.561	0.819022	0.0028134	0.0174564	2.0601	TRUE	TRUE	TRUE	TRUE
Aldh2	328.309	2.56385	4.71e-25	1.09e-22	7.54065	TRUE	TRUE	TRUE	FALSE
Aldh3a1	11.2143	1.97178	0.0305835	0.103611	1.36503	TRUE	FALSE	FALSE	FALSE
Aldh3b1	131.917	0.772588	0.00350336	0.0206843	3.33387	TRUE	FALSE	TRUE	FALSE
Aldh3b2	78.5783	0.704541	0.0251834	0.0905649	2.49814	TRUE	TRUE	TRUE	TRUE
Aldh4a1	33.2626	1.60017	0.00145677	0.0105435	2.77248	TRUE	TRUE	TRUE	FALSE
Aldh4a1	48.4668	-0.733337	0.0388571	0.123042	2.49807	TRUE	TRUE	TRUE	FALSE
Aldh6a1	194.572	-0.890194	2.81e-05	0.000423924	6.42782	TRUE	TRUE	TRUE	TRUE
Aldh7a1	125.472	1.044	0.000372126	0.00356766	3.62442	TRUE	TRUE	TRUE	FALSE
Aldh9a1	221.137	0.691178	0.00194987	0.0132635	3.61607	TRUE	TRUE	TRUE	FALSE
Aldoa	1063.71	0.828625	0.000115577	0.00137746	2.8773	TRUE	TRUE	TRUE	FALSE
Aldoc	21.6619	1.5764	0.00406674	0.023203	6.1908	TRUE	TRUE	TRUE	FALSE
Alg1	23.1286	1.11108	0.0303886	0.103052	3.76181	TRUE	FALSE	TRUE	FALSE
Alg13	192.488	-0.576014	0.00893469	0.0417314	3.70588	TRUE	TRUE	TRUE	FALSE
Pdcd6	50.2182	0.827894	0.0249877	0.0899947	3.03824	TRUE	FALSE	TRUE	FALSE
Alg6	17.0925	-1.70592	0.00730107	0.0358527	2.13978	TRUE	TRUE	TRUE	TRUE
Alkbh2	2.11032	3.57763	0.045568	0.137547	3.19073	TRUE	FALSE	FALSE	FALSE
Alkbh3	161.849	-0.596493	0.0408913	0.127293	1.57187	TRUE	TRUE	TRUE	FALSE
Alkbh7	45.3284	1.15883	0.005096	0.0274041	2.52683	TRUE	TRUE	TRUE	FALSE
Alms1	1427.38	-1.04571	3.35e-09	1.68e-07	5.5179	TRUE	TRUE	FALSE	FALSE
Alpk1	30.4253	-1.43606	0.00078142	0.00637252	5.02338	TRUE	TRUE	TRUE	FALSE
C2cd6	1307.64	-0.686074	0.00348119	0.0205815	1.53762	TRUE	TRUE	TRUE	TRUE
Flacc1	476.695	-1.13745	2.34e-05	0.000363161	2.2357	TRUE	FALSE	FALSE	FALSE
Amer2	201.435	0.596321	0.00794844	0.0382396	3.79681	TRUE	TRUE	TRUE	FALSE
Amfr	525.302	0.643126	0.000310633	0.00308052	7.3089	TRUE	TRUE	TRUE	FALSE
Amhr2	550.857	0.692466	0.00806784	0.0386742	2.17158	FALSE	FALSE	FALSE	FALSE
Amigo1	13.8232	-1.62306	0.0201199	0.077004	2.819	TRUE	TRUE	TRUE	TRUE
Amn	16.2826	1.69503	0.0109968	0.0488758	3.41656	TRUE	TRUE	TRUE	FALSE
Amn1	322.674	-0.872175	0.000708127	0.00588293	1.7631	FALSE	FALSE	TRUE	FALSE
Amotl2	28.092	1.09176	0.0473564	0.141733	1.24418	TRUE	TRUE	TRUE	FALSE
Anapc10	112.512	-1.36042	4.37e-06	8.76e-05	2.72957	TRUE	TRUE	TRUE	TRUE
Anapc11	126.065	1.30087	1.2e-05	0.000208165	3.71534	TRUE	TRUE	TRUE	TRUE
Anapc16	50.2563	0.977066	0.0116052	0.0508167	2.6406	TRUE	TRUE	TRUE	FALSE
Anapc2	136.598	0.767426	0.0015407	0.010981	7.77579	TRUE	FALSE	FALSE	FALSE
Anapc5	278.032	0.683886	0.00069513	0.00579442	6.46206	TRUE	FALSE	TRUE	FALSE
Anapc7	79.2089	0.72086	0.0414946	0.128616	1.7767	TRUE	TRUE	TRUE	FALSE
Angptl1	8.11873	-1.94214	0.0182921	0.0716814	3.47284	TRUE	FALSE	FALSE	FALSE
Ank	48.385	0.852935	0.0170666	0.0679562	5.69335	TRUE	TRUE	TRUE	TRUE
Ankar	703.872	-1.11035	8.3e-09	3.78e-07	4.16668	FALSE	FALSE	FALSE	FALSE
Ankhd1	535.908	-0.66159	0.00370677	0.0215906	3.08868	TRUE	TRUE	FALSE	TRUE
Ankra2	108.788	-0.754115	0.00346361	0.0204916	3.50198	TRUE	TRUE	TRUE	TRUE
Gm9517	265.975	-1.24706	1.62e-07	5.01e-06	5.20778	FALSE	FALSE	FALSE	FALSE
Ankrd13c	140.402	0.745898	0.0119737	0.0520224	2.00509	TRUE	TRUE	TRUE	FALSE
Slf1	213.214	-1.84334	1.23e-15	1.7e-13	5.41545	TRUE	FALSE	FALSE	FALSE
Ankrd33b	46.7831	-1.1472	0.0038335	0.0221424	2.26471	TRUE	TRUE	TRUE	FALSE
Ankrd40	182.496	1.2519	1.09e-06	2.65e-05	4.05233	TRUE	TRUE	TRUE	FALSE
Ankrd44	68.5418	-1.41875	2.55e-06	5.59e-05	5.8493	TRUE	TRUE	TRUE	TRUE
Ankrd45	334.476	-1.04048	5.14e-06	0.000100822	2.78782	TRUE	TRUE	TRUE	FALSE
Ankrd49	194.911	-0.608556	0.0217926	0.0815789	1.58146	TRUE	TRUE	TRUE	FALSE
Ankrd54	714.035	0.537163	0.00313257	0.0189875	4.23852	TRUE	TRUE	TRUE	FALSE
Ankrd55	101.925	-1.58898	1.66e-08	6.74e-07	5.4351	TRUE	FALSE	TRUE	TRUE
Ankrd7	479.619	-1.05701	0.000179916	0.00198942	1.75379	TRUE	FALSE	FALSE	FALSE
Ankrd9	144.788	0.484312	0.0380702	0.121081	5.64351	TRUE	TRUE	FALSE	FALSE
Anks6	54.4639	-3.40731	9.82e-20	1.77e-17	5.68704	TRUE	TRUE	TRUE	FALSE
Ano2	25.6883	-0.955817	0.0414714	0.128567	2.3323	TRUE	TRUE	TRUE	FALSE
Ano3	3.99202	-2.99698	0.0156442	0.063535	2.93246	FALSE	TRUE	TRUE	TRUE
Ano5	63.8262	-1.1479	0.00038527	0.00366122	4.82415	TRUE	TRUE	TRUE	FALSE
Ano8	5.0776	2.82519	0.0472887	0.141629	1.66485	TRUE	FALSE	TRUE	FALSE
Anp32b	109.601	0.797551	0.00388925	0.0224025	3.89563	TRUE	FALSE	FALSE	FALSE
Antxr2	85.9334	-1.08648	0.000389567	0.00369578	3.01633	TRUE	TRUE	TRUE	TRUE
Antxrl	361.116	-0.37646	0.0398215	0.125212	3.88688	FALSE	FALSE	FALSE	FALSE
Anxa11	90.626	-1.01356	0.000653549	0.0055223	2.90242	TRUE	TRUE	TRUE	FALSE
Anxa3	61.7571	-1.593	0.000136906	0.00159324	1.62988	TRUE	TRUE	TRUE	FALSE
Anxa5	42.3711	0.890692	0.0312076	0.10519	2.04329	TRUE	TRUE	FALSE	TRUE
Ap1b1	208.683	0.556646	0.0311434	0.105035	1.96704	TRUE	TRUE	TRUE	FALSE
Ap1s2	91.9211	-2.20439	8.05e-12	6.54e-10	4.81252	TRUE	TRUE	TRUE	TRUE
Ap2m1	94.8896	1.10624	0.000362595	0.00350203	3.66529	TRUE	TRUE	TRUE	TRUE
Ap2s1	259.469	1.19461	6.09e-07	1.58e-05	5.40894	TRUE	TRUE	TRUE	FALSE
Ap3m1	102.439	-0.910481	0.00119028	0.00892067	3.48899	TRUE	TRUE	TRUE	TRUE
Ap3s1	79.7194	-0.796096	0.0186239	0.072619	1.69697	TRUE	TRUE	TRUE	TRUE
Ap3s2	61.4682	0.699506	0.0378689	0.12073	2.70155	TRUE	TRUE	TRUE	FALSE
Ap5m1	45.8097	-0.994232	0.00509816	0.0274072	5.28989	TRUE	TRUE	TRUE	TRUE
Apba3	78.7655	0.725412	0.0213408	0.0803357	2.56167	FALSE	FALSE	FALSE	FALSE
Apc	206.195	-0.752091	0.00954343	0.0439694	2.59471	TRUE	TRUE	TRUE	TRUE
Apcdd1	19.7195	1.48653	0.0129101	0.0550341	2.57674	TRUE	TRUE	TRUE	FALSE
Apeh	57.408	0.747399	0.0364783	0.117356	2.2262	TRUE	FALSE	FALSE	FALSE
Aph1c	22.7017	-1.49483	0.00303857	0.0185345	2.56636	TRUE	TRUE	TRUE	TRUE
Aplp2	684.605	0.464719	0.0123105	0.0530167	2.80682	TRUE	TRUE	TRUE	TRUE
Naxe	75.9924	0.972827	0.011415	0.0501871	1.53606	TRUE	FALSE	FALSE	FALSE
Apob	9.5193	-2.94249	0.000938958	0.0073824	3.74595	TRUE	FALSE	FALSE	FALSE
Apoc1	99.2975	3.38273	0.00722573	0.0356344	2.17358	FALSE	TRUE	FALSE	FALSE
Apoe	318.868	2.56691	9.99e-18	1.54e-15	3.0796	FALSE	TRUE	TRUE	FALSE
Apof	3.83334	4.42528	0.00839243	0.0399535	1.77931	TRUE	FALSE	TRUE	FALSE
Apol7b	8.43636	-1.63956	0.029596	0.101157	2.99307	TRUE	TRUE	FALSE	TRUE
Apoo	5.58329	-2.89741	0.00538719	0.0285267	2.17865	TRUE	TRUE	TRUE	TRUE
Coa8	106.386	1.12855	0.000434663	0.00403965	2.29127	TRUE	FALSE	TRUE	FALSE
App	274.274	1.3887	2.98e-09	1.51e-07	4.68809	TRUE	TRUE	TRUE	FALSE
Appl1	193.252	-1.15762	1.44e-06	3.39e-05	3.38957	TRUE	TRUE	TRUE	TRUE
Aprt	288.734	0.839218	0.00164433	0.011525	1.90435	TRUE	TRUE	TRUE	FALSE
Aqp11	2186.89	-0.713018	0.00121627	0.00907234	1.89693	FALSE	TRUE	TRUE	FALSE
Aqp2	45.7318	-3.12075	9.54e-14	1.04e-11	7.05136	FALSE	TRUE	FALSE	FALSE
Aqp5	108.506	-5.02237	1.07e-37	3.56e-35	5.14897	TRUE	TRUE	TRUE	FALSE
Aqp8	83.3632	0.892302	0.00637917	0.0324895	2.55466	TRUE	TRUE	TRUE	FALSE
Aqp9	247.313	-0.579699	0.00495796	0.0268621	3.32033	TRUE	TRUE	TRUE	FALSE
Aqr	265.407	-0.568865	0.0133069	0.0562886	2.74034	TRUE	TRUE	FALSE	FALSE
Arap2	143.296	-1.17006	5.6e-05	0.000749542	4.25301	TRUE	TRUE	TRUE	FALSE
Arc	721.424	0.750714	1.88e-05	0.000300548	5.41662	TRUE	TRUE	TRUE	TRUE
Arcn1	416.615	-0.495918	0.0172174	0.0684778	1.9389	TRUE	TRUE	TRUE	TRUE
Arf6	172.458	1.26953	1.6e-07	4.97e-06	8.23426	TRUE	TRUE	TRUE	FALSE
Arfgap2	276.044	0.448723	0.0295913	0.101157	3.0954	TRUE	TRUE	TRUE	TRUE
Arfgef1	745.428	-0.593444	0.00506892	0.0272669	2.02943	TRUE	TRUE	TRUE	TRUE
Arfgef3	47.9833	1.34484	0.0362511	0.116907	0.822977	TRUE	TRUE	TRUE	FALSE
Arfip1	58.1037	-0.962732	0.00238321	0.0154058	6.58689	TRUE	TRUE	TRUE	FALSE
Arfip2	40.2758	0.802535	0.0396293	0.124756	3.6832	FALSE	TRUE	TRUE	TRUE
Arfrp1	68.2091	0.71727	0.025935	0.0925459	3.02861	TRUE	TRUE	TRUE	FALSE
Arg2	5.15264	-1.99861	0.0406768	0.126818	2.36766	FALSE	FALSE	FALSE	FALSE
Arhgap20	406.061	-1.35497	3.27e-11	2.38e-09	6.43596	TRUE	TRUE	TRUE	TRUE
Arhgap21	133.494	-2.08627	1.76e-11	1.34e-09	4.55983	TRUE	TRUE	TRUE	FALSE
Arhgap29	1918.78	-0.482058	0.00185497	0.012718	6.17256	TRUE	TRUE	TRUE	TRUE
Arhgap31	85.3785	0.940294	0.0107839	0.0482087	1.63672	TRUE	TRUE	TRUE	TRUE
Arhgap42	26.0475	-1.10644	0.028824	0.0993427	1.25391	TRUE	TRUE	TRUE	FALSE
Arhgap44	78.0964	1.06246	0.00148114	0.0106663	2.68657	TRUE	TRUE	TRUE	FALSE
Arhgap5	1131.43	-1.27574	4.01e-07	1.1e-05	2.32558	TRUE	TRUE	TRUE	FALSE
Arhgdia	187.6	0.62358	0.0106003	0.0475756	2.73686	TRUE	TRUE	TRUE	FALSE
Arhgdig	19.9537	-1.05705	0.0368456	0.11834	5.02687	FALSE	FALSE	TRUE	FALSE
Arhgef1	44.9782	1.21429	0.00206481	0.013828	4.14904	TRUE	FALSE	TRUE	FALSE
Arhgef17	34.1198	1.92079	0.00260441	0.0164848	1.81544	TRUE	TRUE	TRUE	FALSE
Arhgef2	920.74	0.647752	6.89e-05	0.00089133	9.14872	TRUE	TRUE	TRUE	FALSE
Arhgef25	38.3262	0.814345	0.0409899	0.127531	3.72308	FALSE	FALSE	TRUE	FALSE
Arhgef3	98.9242	-0.753422	0.00317719	0.019231	8.28681	TRUE	TRUE	TRUE	FALSE
Arhgef39	34.9171	-1.15571	0.00767464	0.0372538	2.18203	TRUE	TRUE	TRUE	FALSE
Arid1b	92.064	0.756799	0.0490426	0.145223	1.35208	TRUE	TRUE	TRUE	TRUE
Arid2	1694.31	-0.662083	0.0040136	0.0229636	2.24254	TRUE	TRUE	TRUE	TRUE
Arid4a	136.867	-1.01003	0.00216553	0.0143251	2.67148	TRUE	TRUE	TRUE	TRUE
Arid4b	261.296	-0.985857	0.000158787	0.00179948	3.07185	TRUE	TRUE	TRUE	TRUE
Arl1	141.169	0.52872	0.0352893	0.114714	2.73968	FALSE	TRUE	TRUE	FALSE
Arl14ep	134.865	-0.793073	0.00172944	0.0120107	2.83359	TRUE	TRUE	TRUE	FALSE
Arl14epl	79.9712	0.694849	0.0208724	0.0790958	3.14586	TRUE	TRUE	TRUE	FALSE
Arl2	39.2169	1.12252	0.0139702	0.0583808	2.06034	FALSE	FALSE	TRUE	FALSE
Arl3	277.539	0.800894	8.19e-05	0.00103182	6.95879	FALSE	TRUE	TRUE	FALSE
Arl6ip1	704.391	-0.625229	0.000373696	0.00357085	4.24119	TRUE	TRUE	TRUE	TRUE
Arl6ip5	19.9629	2.05502	0.00157	0.0111432	3.15419	TRUE	TRUE	TRUE	FALSE
Arl8b	590.287	-0.72608	0.000361169	0.00349164	2.60516	TRUE	TRUE	TRUE	TRUE
Armc2	204.107	0.450706	0.0468495	0.140605	2.61662	TRUE	TRUE	TRUE	TRUE
Armc5	41.6227	1.25194	0.00785841	0.0379648	2.52682	TRUE	TRUE	TRUE	FALSE
Armc7	10.8368	1.69014	0.0314717	0.10573	2.70026	TRUE	TRUE	TRUE	FALSE
Armc9	304.184	0.444774	0.0353474	0.114843	2.45147	TRUE	TRUE	TRUE	FALSE
Armcx2	28.6537	1.26191	0.0249331	0.089889	1.5532	TRUE	TRUE	TRUE	TRUE
Arpc1b	59.9945	1.22687	0.000955287	0.00749037	2.70782	TRUE	TRUE	FALSE	FALSE
Arpc3	48.6168	1.40605	0.000410125	0.00385444	4.54312	TRUE	TRUE	TRUE	FALSE
Arpc4	64.4301	1.0396	0.001822	0.0125416	4.59859	TRUE	TRUE	TRUE	TRUE
Arpc5	76.357	0.698338	0.0396753	0.124873	1.72588	TRUE	TRUE	TRUE	TRUE
Arpc5l	233.783	0.784192	0.00176476	0.0122059	2.31455	TRUE	TRUE	TRUE	FALSE
Arrb1	95.8686	-0.715012	0.0325671	0.108192	2.22927	TRUE	TRUE	TRUE	FALSE
Arrb2	11.9338	2.12215	0.00864567	0.0407222	3.86167	FALSE	FALSE	FALSE	FALSE
Arrdc3	365.273	-0.715225	0.000287922	0.00289511	3.61097	TRUE	TRUE	TRUE	TRUE
Arrdc5	369.98	0.765947	0.00105083	0.00806053	2.48995	FALSE	FALSE	FALSE	FALSE
Arsa	686.832	0.501649	0.00696053	0.0346724	3.23594	TRUE	TRUE	TRUE	FALSE
Arsk	57.0943	-0.877011	0.0134586	0.0568327	2.29917	TRUE	TRUE	TRUE	TRUE
Arx	16.2332	-1.29699	0.0182475	0.0715713	4.47309	TRUE	TRUE	TRUE	FALSE
Asb1	493.929	-0.738191	0.000525088	0.00468059	2.46713	TRUE	TRUE	TRUE	FALSE
Asb17	699.193	-0.716065	0.000614974	0.00527099	2.40247	FALSE	TRUE	FALSE	FALSE
Asb2	25.526	-1.35743	0.00310685	0.018858	2.98309	TRUE	TRUE	TRUE	FALSE
Asb4	216.881	-0.949612	0.000344046	0.00335043	2.26024	TRUE	TRUE	TRUE	FALSE
Asb8	364.414	0.694064	0.00111333	0.00843835	2.87515	TRUE	TRUE	TRUE	FALSE
Ascc2	379.875	0.515013	0.013426	0.0567092	2.79157	TRUE	TRUE	TRUE	FALSE
Ascc3	591.33	-1.00754	6.01e-06	0.000115991	2.7064	TRUE	TRUE	TRUE	FALSE
Ash1l	426.343	-0.883713	0.000876271	0.00698474	3.31138	TRUE	TRUE	TRUE	TRUE
Ash2l	598.646	0.423589	0.0256832	0.0919041	2.3563	TRUE	TRUE	TRUE	FALSE
Adsl	38.4176	1.33382	0.0013536	0.00995074	5.08112	TRUE	TRUE	TRUE	FALSE
Get3	237.796	1.37074	1.08e-07	3.52e-06	3.74106	FALSE	FALSE	FALSE	FALSE
Asnsd1	1317.69	-0.475054	0.0264372	0.0939223	1.52847	TRUE	FALSE	FALSE	FALSE
Aspg	5.96957	-2.10516	0.0314426	0.105715	1.90941	TRUE	TRUE	TRUE	FALSE
Aspm	176.978	-1.24995	2.95e-06	6.28e-05	3.6233	TRUE	TRUE	FALSE	FALSE
Aspn	26.4055	-2.63512	1.25e-06	2.98e-05	1.94207	TRUE	TRUE	TRUE	FALSE
Aspscr1	614.521	1.18951	1.49e-10	9.7e-09	7.2909	TRUE	TRUE	FALSE	FALSE
Astn1	3.01804	-4.24727	0.0195204	0.0752174	0.915469	TRUE	TRUE	TRUE	FALSE
Asxl1	614.147	0.448107	0.0142075	0.0590017	3.00628	TRUE	TRUE	TRUE	FALSE
Asxl2	296.234	-0.544462	0.0072899	0.0358284	3.64125	TRUE	TRUE	TRUE	TRUE
Asz1	88.9038	-1.04685	0.0057975	0.0301641	1.46744	TRUE	TRUE	TRUE	FALSE
Atad1	606.926	-0.823836	0.000540058	0.00477553	1.87234	TRUE	TRUE	TRUE	TRUE
Atad2	257.06	-0.55606	0.0145436	0.0599232	2.16402	TRUE	TRUE	TRUE	TRUE
Atad2b	115.581	-0.762349	0.0111982	0.0495361	1.78622	TRUE	TRUE	TRUE	TRUE
Atf2	407.773	-0.447486	0.0164272	0.0658953	4.09637	TRUE	TRUE	TRUE	TRUE
Atf6b	81.2595	1.52388	3.9e-06	8.01e-05	6.45727	TRUE	TRUE	TRUE	FALSE
Atf5	182.426	-1.2415	0.0021473	0.0142317	1.53268	TRUE	FALSE	TRUE	FALSE
Atf7ip2	179.759	-1.25132	4.11e-09	2.01e-07	18.5438	TRUE	TRUE	TRUE	TRUE
Atg12	285.96	-0.626028	0.00449087	0.0250051	3.86943	TRUE	TRUE	TRUE	FALSE
Atg14	35.1686	0.945237	0.0300818	0.102353	2.83006	FALSE	TRUE	TRUE	FALSE
Atg2a	297.853	0.811073	0.00585784	0.0304231	1.5734	TRUE	TRUE	TRUE	FALSE
Atg3	94.9798	-0.599244	0.0329411	0.109087	2.00242	TRUE	TRUE	TRUE	FALSE
Atg4a	3.02365	-4.16383	0.0065914	0.0332619	4.5209	TRUE	TRUE	TRUE	TRUE
Atg4c	108.793	-0.714844	0.00594071	0.0307797	3.1569	TRUE	TRUE	TRUE	TRUE
Atg4d	66.3248	1.00601	0.00444137	0.0248088	2.40182	TRUE	TRUE	TRUE	TRUE
Atg7	198.571	0.536864	0.0125697	0.0538945	5.34002	TRUE	TRUE	TRUE	FALSE
Atl3	2173.91	0.449747	0.0425856	0.131036	1.29407	TRUE	TRUE	TRUE	TRUE
Atm	152.868	-1.05614	2.62e-05	0.000400521	5.23738	TRUE	TRUE	TRUE	TRUE
Atoh8	433.203	0.763985	0.00213274	0.0141624	2.04281	TRUE	TRUE	TRUE	TRUE
Atox1	66.0553	0.868555	0.0241178	0.087791	1.68362	FALSE	TRUE	TRUE	FALSE
Atp10a	336.325	-0.433233	0.0431779	0.132387	2.11073	FALSE	TRUE	FALSE	FALSE
Atp11b	318.446	-0.691116	0.000451608	0.0041636	3.75253	TRUE	TRUE	TRUE	TRUE
Atp11c	97.9277	-1.28645	4.22e-06	8.56e-05	5.18832	TRUE	TRUE	TRUE	TRUE
Atp13a2	87.8933	1.14955	0.00173039	0.0120114	2.02395	TRUE	TRUE	TRUE	FALSE
Atp13a3	189.089	-0.593309	0.0065827	0.0332303	4.17998	FALSE	TRUE	TRUE	TRUE
Atp13a4	19.6769	-0.995886	0.0473	0.141638	2.5325	TRUE	FALSE	TRUE	FALSE
Atp1a1	357.298	1.57187	3.73e-09	1.84e-07	2.77533	TRUE	FALSE	TRUE	FALSE
Atp1a2	202.48	0.84619	0.00498903	0.0270051	1.92044	TRUE	TRUE	TRUE	TRUE
Atp1a4	2789.78	-0.347423	0.0311	0.104878	2.93084	FALSE	TRUE	TRUE	FALSE
Atp1b1	106.719	0.987264	0.00100011	0.00775534	3.5383	TRUE	TRUE	TRUE	TRUE
Atp1b3	1161.26	0.67915	0.000741337	0.00611188	2.82717	TRUE	TRUE	TRUE	FALSE
Atp2a2	609.084	0.856768	2.94e-06	6.26e-05	5.79507	TRUE	TRUE	TRUE	FALSE
Atp2b3	39.9037	-1.71047	1.02e-05	0.000182552	3.2939	TRUE	TRUE	TRUE	TRUE
Atp2c1	165.571	-0.880824	0.00012791	0.0015027	5.85562	TRUE	TRUE	TRUE	FALSE
Atp5a1	756.956	1.35378	1.83e-15	2.4e-13	12.1771	TRUE	TRUE	TRUE	FALSE
Atp5b	1620.07	0.699456	5.36e-05	0.00072425	4.20855	TRUE	TRUE	TRUE	FALSE
Atp5d	205.082	2.09587	6.73e-19	1.16e-16	16.6457	TRUE	FALSE	TRUE	FALSE
Atp5e	184.462	1.33584	9.43e-06	0.000171638	2.23609	FALSE	FALSE	TRUE	FALSE
Atp5g2	35.8983	1.1116	0.0110277	0.0489695	2.82654	FALSE	TRUE	FALSE	FALSE
Atp5g3	117.851	1.51843	1.14e-06	2.76e-05	4.91014	TRUE	TRUE	FALSE	TRUE
Atp5j	276.661	-0.488371	0.0282788	0.0980889	2.01603	TRUE	TRUE	FALSE	FALSE
Atp6v0a2	127.612	0.5234	0.0353859	0.114931	3.65696	TRUE	TRUE	TRUE	TRUE
Atp6v0b	172.621	0.523587	0.0326999	0.108517	2.26781	TRUE	FALSE	TRUE	FALSE
Atp6v0d1	117.551	0.960498	0.00115	0.00862714	2.65005	TRUE	TRUE	TRUE	FALSE
Atp6v1e2	281.22	1.17613	7.03e-06	0.000133215	2.612	FALSE	FALSE	TRUE	FALSE
Atp6v1f	129.054	1.03613	0.00226544	0.0147635	1.80058	TRUE	FALSE	TRUE	FALSE
Atp8a1	47.4146	-1.58577	3.4e-06	7.12e-05	13.63	TRUE	TRUE	TRUE	TRUE
Atp8a2	277.483	-0.759337	0.000134615	0.00156869	5.16241	TRUE	TRUE	TRUE	FALSE
Atp8b3	7555.55	0.440575	0.0161408	0.0650717	2.30166	TRUE	TRUE	TRUE	FALSE
Atp8b5	237.573	-0.512587	0.0160556	0.06478	3.47001	TRUE	TRUE	TRUE	FALSE
Atpaf2	148.963	0.523699	0.0427627	0.131449	2.12679	TRUE	TRUE	TRUE	TRUE
Atr	2552.83	-1.06275	3.57e-07	9.87e-06	3.06658	TRUE	TRUE	FALSE	FALSE
Atrnl1	104.393	-0.819638	0.00708475	0.0351328	1.93935	TRUE	TRUE	TRUE	TRUE
Atrx	103.221	-1.36499	0.000256926	0.00264021	2.2862	TRUE	TRUE	TRUE	FALSE
Atxn2l	2146.84	0.464987	0.0340256	0.111709	1.45494	TRUE	TRUE	TRUE	FALSE
Atxn7l2	41.433	-0.742425	0.0491564	0.145411	1.89655	FALSE	FALSE	FALSE	FALSE
AU021092	65.707	1.26995	0.00131	0.00967993	2.35681	FALSE	TRUE	FALSE	FALSE
AU022252	46.2173	1.37971	0.000335059	0.00327767	6.67941	TRUE	TRUE	TRUE	FALSE
AU022754	2.90171	-5.95667	0.000474736	0.00433068	19.2692	TRUE	FALSE	FALSE	FALSE
AU022793	2.04337	-4.42695	0.0286298	0.0987914	1.04018	TRUE	FALSE	FALSE	FALSE
AU040320	304.423	0.636823	0.00505	0.0271974	2.70241	TRUE	TRUE	TRUE	TRUE
AU041133	9.81551	-2.23411	0.00503808	0.0271728	1.84256	TRUE	TRUE	TRUE	TRUE
Auh	14.6706	1.35366	0.0392259	0.12396	2.95629	TRUE	TRUE	TRUE	TRUE
Aurka	482.685	0.597055	0.00340551	0.0202656	2.7373	TRUE	TRUE	TRUE	FALSE
Auts2	39.3378	0.887655	0.0416258	0.128953	1.81073	TRUE	TRUE	TRUE	FALSE
Avl9	124.98	-0.748221	0.00333347	0.0199657	3.13154	TRUE	TRUE	TRUE	TRUE
Avpi1	21.4272	1.92338	0.000856972	0.00686251	5.90467	FALSE	TRUE	TRUE	FALSE
Avpr1b	118.586	-11.3102	8.42e-21	1.57e-18	7.26648	TRUE	TRUE	TRUE	FALSE
AW046200	29.3311	-2.21755	6.31e-06	0.000121179	2.20309	FALSE	FALSE	FALSE	FALSE
AW146154	7.82148	-2.48367	0.00490696	0.0266525	2.10587	TRUE	TRUE	TRUE	FALSE
Rimoc1	217.594	-2.31018	3.03e-25	7.09e-23	7.71153	TRUE	FALSE	FALSE	FALSE
AW554918	476.824	-0.446162	0.0269839	0.095163	1.87494	TRUE	TRUE	TRUE	FALSE
Awat2	13.6779	-1.58344	0.0155	0.0631001	2.2644	TRUE	TRUE	TRUE	TRUE
Axin1	154.354	1.31989	9.32e-08	3.11e-06	10.7729	TRUE	TRUE	TRUE	FALSE
Axin2	1644.81	-7.5694	1.05e-199	2.28e-196	17.3092	TRUE	TRUE	TRUE	TRUE
AY702102	209.98	-0.997305	0.00561039	0.029376	1.45062	FALSE	FALSE	FALSE	FALSE
AY702103	520.301	-0.468091	0.018007	0.0708531	2.08445	FALSE	FALSE	FALSE	FALSE
Aym1	18.4816	-1.21399	0.0204555	0.0779134	4.03056	TRUE	TRUE	FALSE	FALSE
Azin1	499.428	-1.03829	7.56e-10	4.27e-08	31.3723	TRUE	TRUE	TRUE	FALSE
Azin2	801.45	1.73335	3.52e-11	2.55e-09	2.83752	TRUE	FALSE	TRUE	TRUE
Iftap	333.515	-1.04458	0.00126	0.00934815	1.301	TRUE	FALSE	TRUE	FALSE
B230307C23Rik	7.64678	-1.73029	0.0276789	0.0967646	2.73754	TRUE	TRUE	TRUE	FALSE
B3galt1	9.50719	-1.5988	0.0416	0.129001	2.38836	TRUE	TRUE	TRUE	FALSE
B3galt2	34.4674	-3.79667	1.42e-15	1.9e-13	16.0653	TRUE	TRUE	TRUE	TRUE
B3gat2	9.58461	-2.7949	0.000548336	0.00483637	3.20535	TRUE	TRUE	TRUE	FALSE
B3gat3	31.4706	1.17916	0.0119928	0.0520921	2.72224	TRUE	FALSE	TRUE	FALSE
B3gnt8	5.03947	2.81339	0.0351185	0.114299	4.8936	TRUE	FALSE	TRUE	FALSE
B4galnt1	102.942	0.637102	0.0270644	0.0953669	2.33659	TRUE	TRUE	TRUE	FALSE
B4galnt3	35.8718	1.11518	0.010415	0.0470051	3.09416	FALSE	TRUE	TRUE	FALSE
B4galnt4	32.2798	-0.848812	0.0406926	0.126818	2.03324	FALSE	TRUE	TRUE	FALSE
B4galt5	63.715	0.983055	0.0116739	0.05104	2.16402	TRUE	TRUE	TRUE	FALSE
B4galt7	24.4239	2.3332	0.000367955	0.00353356	4.32108	TRUE	TRUE	TRUE	FALSE
Bmt2	58.0642	-0.900063	0.0109981	0.0488758	2.2337	TRUE	TRUE	TRUE	TRUE
B930018H19Rik	7.12626	-2.70138	0.00261662	0.0165318	5.97251	FALSE	FALSE	FALSE	FALSE
B9d1	253.476	0.789058	0.0108587	0.0484553	1.44225	FALSE	TRUE	FALSE	FALSE
Babam1	125.458	0.803515	0.00333434	0.0199657	3.23205	FALSE	FALSE	TRUE	FALSE
Bag1	1057.22	0.762221	0.000119644	0.00142103	3.12744	TRUE	TRUE	FALSE	FALSE
Bag2	20.9566	1.56908	0.0175133	0.0693699	2.03212	TRUE	TRUE	TRUE	TRUE
Bag3	109.457	0.608572	0.044901	0.136198	1.78805	TRUE	TRUE	TRUE	TRUE
Bag5	1712.19	0.702505	1.04e-05	0.000185099	5.96596	TRUE	TRUE	TRUE	FALSE
Bag6	2993.52	1.03602	4.21e-11	2.98e-09	9.87325	FALSE	TRUE	FALSE	FALSE
Bahd1	100.723	0.6642	0.039285	0.124011	1.63185	TRUE	TRUE	TRUE	FALSE
Baiap2	451.767	0.818993	1.94e-05	0.000307407	5.85414	TRUE	FALSE	TRUE	FALSE
Baiap3	3.87623	3.36015	0.0259468	0.0925601	6.9211	FALSE	TRUE	TRUE	TRUE
Bak1	36.4276	1.24268	0.00478618	0.0262187	3.77056	TRUE	TRUE	TRUE	FALSE
Bap1	466.523	0.776265	0.000291959	0.00292688	3.1643	TRUE	TRUE	FALSE	FALSE
Barhl2	5.19436	-3.3123	0.00294	0.0180767	2.70567	TRUE	TRUE	TRUE	TRUE
Basp1	117.852	0.981274	0.000365	0.00351281	4.5174	TRUE	TRUE	TRUE	FALSE
Baz1a	1059.35	-0.640478	7.17e-05	0.000922981	6.96973	TRUE	TRUE	TRUE	TRUE
Baz2b	382.926	-0.635221	0.0127295	0.0544581	2.13357	TRUE	TRUE	TRUE	TRUE
BB014433	720.041	0.43337	0.0239	0.0871102	2.20293	FALSE	FALSE	FALSE	FALSE
BB031773	4.06216	-2.94447	0.017592	0.0695837	1.77405	FALSE	FALSE	FALSE	FALSE
Bbc3	6.87619	2.62865	0.0180035	0.0708531	3.85594	FALSE	FALSE	TRUE	FALSE
Bbs4	98.8382	-0.678018	0.0159744	0.0645882	2.40479	TRUE	TRUE	TRUE	FALSE
Bbs5	302.459	-0.701905	0.0196	0.0754311	1.19307	TRUE	FALSE	FALSE	FALSE
Bbs7	299.609	-0.413246	0.0359671	0.116295	3.59868	TRUE	TRUE	FALSE	FALSE
Bbx	1141.11	-0.373741	0.0489114	0.144958	2.15873	TRUE	TRUE	TRUE	TRUE
BC002163	11.9203	1.689	0.028637	0.0987951	3.13805	FALSE	FALSE	FALSE	FALSE
BC005537	827.201	-0.865738	1.16e-05	0.000202282	5.0276	FALSE	TRUE	FALSE	FALSE
BC005561	262.684	-2.15794	8.37e-16	1.17e-13	7.02263	FALSE	FALSE	FALSE	FALSE
BC005624	48.7023	1.54544	0.000129772	0.00152355	3.67527	TRUE	TRUE	TRUE	TRUE
BC022687	265.592	0.591222	0.0188	0.07309	1.73989	FALSE	TRUE	FALSE	FALSE
BC030336	75.6063	-1.19162	3.77e-05	0.000541758	5.29317	FALSE	FALSE	FALSE	FALSE
BC030867	100.543	0.966254	0.00157736	0.0111824	2.5968	FALSE	TRUE	FALSE	FALSE
BC037032	9.85216	-1.71336	0.0248549	0.0897191	2.02482	FALSE	FALSE	FALSE	FALSE
BC037034	953.247	-3.72485	2.1e-86	1.46e-83	8.66798	FALSE	TRUE	FALSE	FALSE
BC046251	2.02121	-4.41472	0.0449242	0.136221	0.781822	TRUE	FALSE	FALSE	FALSE
BC048502	231.869	-0.818682	0.00922802	0.0428585	1.36007	FALSE	FALSE	FALSE	FALSE
BC048507	106.318	0.688994	0.0143666	0.0594485	2.7195	TRUE	TRUE	TRUE	FALSE
BC049730	271.789	-0.62885	0.00393703	0.0225971	3.77795	FALSE	FALSE	FALSE	FALSE
BC051628	541.982	0.460968	0.0493855	0.145939	1.42593	FALSE	FALSE	FALSE	FALSE
BC061237	226.878	-0.703002	0.0321243	0.107298	1.13362	TRUE	TRUE	FALSE	FALSE
BC065397	8.88527	-1.50453	0.0477478	0.142658	1.44507	TRUE	FALSE	FALSE	FALSE
BC100451	1439.37	0.448427	0.00360219	0.0211452	6.77844	FALSE	FALSE	FALSE	FALSE
Bcam	16.7522	2.23066	0.00223658	0.0146717	2.72784	TRUE	TRUE	TRUE	FALSE
Bcap29	1069.54	-1.22626	1.37e-09	7.33e-08	4.00366	TRUE	TRUE	TRUE	TRUE
Bcar1	112.053	0.738213	0.0152179	0.0622126	2.14742	TRUE	FALSE	TRUE	FALSE
Bcas3os1	3.08432	-3.71363	0.0335431	0.110624	0.891805	FALSE	FALSE	FALSE	FALSE
Bcat2	90.8369	1.64139	8.92e-07	2.22e-05	6.04491	TRUE	TRUE	TRUE	FALSE
Bccip	50.9921	-1.30564	0.000221406	0.00234052	3.57603	FALSE	FALSE	FALSE	FALSE
Bckdha	184.611	0.548747	0.0302504	0.102744	2.25639	FALSE	TRUE	TRUE	FALSE
Bckdk	21.2767	1.24762	0.0254164	0.0912701	2.81387	TRUE	TRUE	TRUE	FALSE
Bcl11a	80.8652	-0.766583	0.0108979	0.0485663	2.1415	TRUE	TRUE	TRUE	TRUE
Bcl2l11	37.7968	-0.753007	0.0476626	0.142453	2.47008	TRUE	TRUE	TRUE	TRUE
Bcl7b	78.1945	1.37755	1.15e-05	0.000201623	8.92355	TRUE	TRUE	FALSE	FALSE
Bcl7c	124.006	1.97771	5.68e-12	4.84e-10	6.79871	TRUE	TRUE	TRUE	FALSE
Bcl9l	41.8542	1.73107	0.000490344	0.00442975	2.113	TRUE	TRUE	TRUE	FALSE
Bclaf1	425.044	-0.800136	7.36e-05	0.000941573	4.46398	TRUE	TRUE	TRUE	FALSE
Bcr	103.196	0.813614	0.0212988	0.0802298	1.73415	TRUE	TRUE	TRUE	TRUE
Bdp1	147.918	-1.08937	0.000520482	0.00464866	2.80721	TRUE	TRUE	TRUE	FALSE
Becn1	210.031	0.531154	0.0293216	0.100438	2.23203	TRUE	TRUE	TRUE	TRUE
Best1	847.294	-0.326428	0.0410301	0.127615	5.58114	FALSE	FALSE	TRUE	FALSE
Bet1	78.7738	-1.12817	0.00073	0.00603582	1.99769	TRUE	TRUE	TRUE	FALSE
Bex1	23.079	1.28476	0.0133958	0.0565952	4.49734	TRUE	TRUE	FALSE	FALSE
Bfsp2	8.14907	-1.82456	0.0166787	0.0667496	3.31906	TRUE	FALSE	TRUE	TRUE
Bhmt	216.871	1.85373	7.71e-07	1.94e-05	2.55551	TRUE	TRUE	TRUE	FALSE
Bicc1	25.1185	1.50633	0.00547	0.0288784	3.02296	TRUE	TRUE	TRUE	FALSE
Bin2	62.8518	1.54352	1.93e-05	0.000306845	5.60386	FALSE	TRUE	FALSE	FALSE
Birc3	439.794	-0.73858	3.57e-05	0.000518356	10.5199	TRUE	TRUE	TRUE	TRUE
Birc6	589.391	-0.892844	0.00200104	0.0135363	2.41541	TRUE	FALSE	FALSE	FALSE
Bloc1s1	61.3484	1.19601	0.00389732	0.0224361	2.13199	FALSE	FALSE	FALSE	FALSE
Bloc1s2	59.5571	0.76999	0.0302	0.102731	2.2649	TRUE	TRUE	TRUE	FALSE
Bloc1s3	19.0772	1.41361	0.0207258	0.0786534	2.24248	TRUE	TRUE	TRUE	FALSE
Blzf1	192.391	-0.568656	0.0356744	0.115543	1.31978	TRUE	TRUE	TRUE	TRUE
Bmp3	7.11787	-3.02985	0.000820179	0.0066311	3.12888	TRUE	TRUE	TRUE	TRUE
Bmp7	431.744	1.86485	6.8e-13	6.73e-11	5.76032	TRUE	TRUE	TRUE	TRUE
Bmpr2	162.824	-0.959562	0.00118	0.00886837	3.1742	FALSE	TRUE	TRUE	TRUE
Bnip1	66.1245	0.908358	0.0278361	0.0971176	1.53203	TRUE	FALSE	TRUE	FALSE
Bod1	166.334	1.44315	1.29e-07	4.1e-06	4.33856	TRUE	TRUE	TRUE	FALSE
Bod1l	345.212	-0.610795	0.0266	0.0944166	1.80346	TRUE	TRUE	TRUE	TRUE
Boll	632.038	-1.05821	1.92e-08	7.7e-07	6.29137	FALSE	FALSE	TRUE	FALSE
Bop1	151.891	0.570086	0.0215	0.0809276	2.68971	TRUE	TRUE	TRUE	TRUE
Bpifa3	278.176	0.570481	0.0143229	0.0593389	2.14646	TRUE	FALSE	FALSE	FALSE
Bpifb9a	2.32415	-4.63277	0.00890271	0.0416379	5.21762	TRUE	FALSE	FALSE	FALSE
Bpifb9b	4.4692	-4.66096	0.0013575	0.00996669	1.90416	TRUE	FALSE	FALSE	FALSE
Bpnt1	65.5727	0.847027	0.0108346	0.0483853	3.09559	TRUE	TRUE	TRUE	FALSE
Braf	365.429	-0.628827	0.000740732	0.00610981	5.28804	TRUE	TRUE	TRUE	FALSE
Brap	984.644	0.513576	0.00211672	0.014083	5.13943	TRUE	TRUE	TRUE	FALSE
Brca1	129.22	-1.16207	8.65e-05	0.00107914	3.7198	TRUE	TRUE	TRUE	FALSE
Brca2	469.003	-0.93391	0.000206	0.00219888	3.16701	TRUE	TRUE	TRUE	TRUE
Brcc3	20.4218	-1.47702	0.00392926	0.0225621	2.4838	TRUE	TRUE	TRUE	TRUE
Brd1	243.954	0.84218	0.000742589	0.00611929	2.98605	TRUE	TRUE	TRUE	FALSE
Brd2	1362.45	0.568091	0.000251	0.00259072	10.2917	TRUE	TRUE	TRUE	TRUE
Brd3	532.266	0.508375	0.0209	0.0790998	1.95969	TRUE	TRUE	TRUE	FALSE
Brd4	126.302	1.04932	0.00304169	0.0185405	1.67654	TRUE	TRUE	TRUE	TRUE
Brd9	178.719	-0.679563	0.00337	0.0201086	2.84084	TRUE	TRUE	TRUE	FALSE
Zfp36l1	185.955	0.521509	0.0442726	0.134836	1.84757	TRUE	TRUE	TRUE	TRUE
Zfp36l2	67.1795	1.09645	0.0015	0.0107674	3.1727	TRUE	TRUE	TRUE	FALSE
Bri3	84.2131	0.81689	0.0126	0.0538709	2.16559	TRUE	FALSE	TRUE	FALSE
Bri3bp	103.566	0.700581	0.0144	0.059677	2.57165	TRUE	TRUE	TRUE	TRUE
Brinp3	31.4652	-1.01025	0.0324622	0.10801	1.38001	TRUE	TRUE	TRUE	TRUE
Brms1	487.129	0.825786	0.0034595	0.0204813	1.64738	TRUE	FALSE	TRUE	FALSE
Brms1l	63.8447	-0.73388	0.0209243	0.0791983	2.47457	TRUE	TRUE	TRUE	FALSE
Brwd1	378.147	-0.80762	0.00112	0.00847293	2.55207	TRUE	TRUE	TRUE	TRUE
Brwd3	86.9747	-0.992954	0.00128	0.00945624	3.98017	TRUE	TRUE	TRUE	TRUE
Bsdc1	227.298	1.00096	3.24e-06	6.81e-05	8.72053	TRUE	FALSE	TRUE	FALSE
Bsg	1381.18	1.16327	6.91e-08	2.37e-06	3.25109	TRUE	FALSE	FALSE	FALSE
Bst2	8.33481	2.4509	0.0168314	0.0672206	3.55807	TRUE	TRUE	TRUE	TRUE
Btaf1	1341.27	-0.772153	1.2e-05	0.000208165	5.94038	TRUE	TRUE	TRUE	FALSE
Btbd1	848.23	0.579437	0.00732	0.0359121	2.25959	TRUE	TRUE	TRUE	TRUE
Btbd2	61.6093	0.651682	0.0471276	0.141219	3.02637	TRUE	TRUE	TRUE	FALSE
Btd	25.2714	1.0847	0.0268	0.0947574	3.96904	TRUE	TRUE	FALSE	FALSE
Btg4	43.3353	-0.914369	0.0150749	0.0617302	1.9414	TRUE	TRUE	FALSE	FALSE
Btrc	305.248	0.677141	0.00171	0.0118997	3.7853	TRUE	TRUE	TRUE	FALSE
Bub1	444.233	-0.875062	0.00109	0.00827332	1.58691	TRUE	TRUE	TRUE	TRUE
C030034I22Rik	7.98137	-2.24913	0.00777346	0.0376069	1.631	FALSE	FALSE	FALSE	FALSE
C130060C02Rik	1.94581	-4.37055	0.0276931	0.0967888	1.55265	FALSE	FALSE	FALSE	FALSE
C130074G19Rik	33.7388	1.59025	0.00139953	0.0101974	2.63841	TRUE	TRUE	TRUE	FALSE
C1d	32.5499	-0.995375	0.0409804	0.127525	1.04435	TRUE	TRUE	TRUE	TRUE
C1galt1	85.829	-1.2352	0.000918192	0.00725738	1.40024	TRUE	TRUE	TRUE	FALSE
C1qa	20.2429	1.5677	0.0065	0.0329132	3.40602	TRUE	TRUE	TRUE	FALSE
C1qbp	65.4743	1.05224	0.00144744	0.0104918	4.96368	TRUE	FALSE	TRUE	FALSE
C1qc	21.4125	1.46028	0.0132	0.0559307	1.97168	TRUE	TRUE	TRUE	FALSE
C1qtnf2	11.7462	6.0433	1.11e-05	0.000194662	2.34936	FALSE	FALSE	TRUE	FALSE
C1qtnf3	48.4224	-1.07495	0.00160536	0.0113345	4.55479	TRUE	TRUE	TRUE	TRUE
C1qtnf4	497.553	1.25541	8.77e-06	0.000160933	2.12821	TRUE	TRUE	FALSE	FALSE
C1qtnf7	3.61685	3.26219	0.0333	0.109981	4.87656	TRUE	TRUE	TRUE	FALSE
C1ra	21.3199	1.46132	0.0148885	0.0610967	1.86155	TRUE	FALSE	TRUE	FALSE
C1rl	8.18859	2.3962	0.0202153	0.0772604	2.14963	TRUE	TRUE	TRUE	TRUE
C2	71.3005	0.903153	0.0112777	0.0497605	2.0715	TRUE	TRUE	TRUE	TRUE
Snhg14	108.206	-3.09715	1.5e-21	2.97e-19	4.62261	FALSE	FALSE	FALSE	FALSE
C2cd2	68.1529	-0.778305	0.00866913	0.0407994	6.71665	TRUE	TRUE	TRUE	FALSE
C2cd3	416.216	-0.543413	0.0304336	0.103184	1.76425	TRUE	TRUE	TRUE	FALSE
C3	51.2834	1.18491	0.0163982	0.0657944	1.36601	FALSE	FALSE	FALSE	FALSE
Tmem250-ps	88.4865	0.637658	0.0249676	0.0899673	3.9981	FALSE	FALSE	TRUE	FALSE
C330018D20Rik	37.9255	-0.813042	0.0474292	0.141872	2.91631	TRUE	TRUE	TRUE	TRUE
Rps23rg1	18.4518	-2.32271	4.07e-05	0.000577265	5.98604	TRUE	FALSE	TRUE	FALSE
Cip2a	264.273	-1.00041	0.000235643	0.00246095	1.96715	TRUE	FALSE	FALSE	FALSE
C430049B03Rik	16.3851	-1.45538	0.01737	0.0689738	1.5689	TRUE	FALSE	FALSE	FALSE
C4bp	5.218	-3.2954	0.00205058	0.0137646	2.49224	TRUE	TRUE	TRUE	FALSE
C4bp-ps1	9.10698	-1.63245	0.0302972	0.102863	1.6881	FALSE	FALSE	FALSE	FALSE
Nexmif	38.224	-0.890283	0.027486	0.096343	1.71206	TRUE	FALSE	TRUE	TRUE
Cab39	791.954	-1.98204	1.25e-29	3.49e-27	8.61019	TRUE	TRUE	TRUE	TRUE
Cables2	65.2898	0.665312	0.0420622	0.129794	2.75356	TRUE	TRUE	TRUE	FALSE
Cabs1	2849.88	-0.868867	0.00178	0.0122964	1.43828	TRUE	TRUE	FALSE	FALSE
Cacna1b	9.62393	1.69076	0.0431963	0.132389	2.26496	TRUE	TRUE	TRUE	FALSE
Cacna1c	112.475	-3.0479	4.42e-15	5.59e-13	5.18121	FALSE	TRUE	TRUE	TRUE
Cacna1h	699.727	0.612644	0.0326	0.108253	1.169	TRUE	TRUE	TRUE	FALSE
Cacna1i	28.3676	-1.54515	0.00251	0.0160144	3.72553	TRUE	TRUE	TRUE	FALSE
Cacna2d2	22.351	-1.44853	0.0067918	0.0340278	1.79011	TRUE	TRUE	TRUE	TRUE
Cacna2d3	16.046	-1.566	0.00922037	0.0428349	2.56546	TRUE	FALSE	FALSE	FALSE
Cacnb4	37.475	-1.95106	1.56e-06	3.6e-05	4.86517	TRUE	TRUE	TRUE	TRUE
Cacng8	16.8018	1.74179	0.00642061	0.0326119	3.90832	FALSE	TRUE	TRUE	FALSE
Cacul1	557.038	0.993481	3.05e-07	8.63e-06	5.19669	TRUE	TRUE	TRUE	TRUE
Cacybp	178.707	-0.660388	0.0127347	0.0544581	1.80342	TRUE	TRUE	TRUE	TRUE
Cad	115.111	1.37676	9.03e-05	0.00112147	2.17256	TRUE	TRUE	FALSE	FALSE
Cadm2	52.4011	-2.01152	6.38e-08	2.21e-06	3.33456	TRUE	TRUE	TRUE	TRUE
Cadps2	23.6186	-1.22803	0.0104935	0.0472274	2.22408	TRUE	TRUE	TRUE	TRUE
Cage1	1752.63	-0.594459	0.00183659	0.012622	2.45403	TRUE	FALSE	FALSE	FALSE
Calcoco1	73.5187	1.11182	0.000784105	0.0063914	4.19315	TRUE	TRUE	TRUE	FALSE
Cald1	49.5364	1.02642	0.0165264	0.0662164	1.88463	TRUE	TRUE	TRUE	TRUE
Calm3	1954.05	1.00111	6.18e-08	2.15e-06	5.13868	TRUE	TRUE	TRUE	FALSE
Calr	1867.81	0.596572	0.000925556	0.00730025	2.94403	TRUE	TRUE	TRUE	FALSE
Calr3	533.783	-0.456813	0.0363384	0.117058	1.70952	TRUE	FALSE	TRUE	FALSE
Camk1	5.74698	5.0167	0.000625533	0.00534501	2.50045	FALSE	FALSE	FALSE	FALSE
Camk1d	2419.97	-3.67616	3.33e-85	2.21e-82	8.04316	TRUE	TRUE	TRUE	TRUE
Camk2b	16.6599	1.53629	0.0175138	0.0693699	3.46271	TRUE	TRUE	TRUE	FALSE
Camsap3	110.492	1.13243	8.12e-05	0.00102426	4.08039	TRUE	FALSE	FALSE	FALSE
Camta1	73.6524	-0.974079	0.00201915	0.0136064	2.84061	TRUE	TRUE	TRUE	TRUE
Cant1	159.851	0.714812	0.00219606	0.0144828	5.73541	TRUE	TRUE	TRUE	FALSE
Cap1	376.921	1.31617	3.14e-12	2.77e-10	20.0963	TRUE	TRUE	TRUE	FALSE
Cap2	256.948	0.468916	0.0289727	0.0996764	2.72676	TRUE	TRUE	TRUE	TRUE
Capn11	194.034	0.515708	0.0216982	0.0813614	3.54685	TRUE	TRUE	FALSE	FALSE
Capns1	742.433	0.419891	0.0102654	0.0465292	6.68391	TRUE	TRUE	TRUE	FALSE
Cadps2	61.5816	-1.82576	1.43e-07	4.51e-06	3.38469	TRUE	TRUE	TRUE	TRUE
Capsl	39.8878	-0.952299	0.0371084	0.119007	1.34084	FALSE	TRUE	FALSE	FALSE
Capza1	370.788	-0.504776	0.0351528	0.114389	1.44342	TRUE	TRUE	TRUE	FALSE
Capza2	144.315	-0.506198	0.0387682	0.122895	2.73798	TRUE	TRUE	TRUE	TRUE
Capza3	834.541	-0.771779	0.0198522	0.0761229	1.10597	FALSE	FALSE	TRUE	FALSE
Capzb	867.432	0.804935	1.21e-05	0.000209305	4.2049	TRUE	TRUE	TRUE	FALSE
Car13	3.60842	-2.73472	0.0287033	0.0989661	2.90627	TRUE	TRUE	TRUE	TRUE
Car14	9.30553	-2.31714	0.00177047	0.0122405	8.22176	TRUE	TRUE	FALSE	FALSE
Car2	636.006	0.699008	0.00629291	0.032209	1.45794	TRUE	TRUE	TRUE	FALSE
Carf	155.679	-0.782397	0.00105029	0.00806053	3.0319	TRUE	TRUE	TRUE	TRUE
Naxd	79.981	0.774713	0.0122176	0.0527905	2.78812	TRUE	FALSE	FALSE	FALSE
Casc3	176.161	0.544801	0.0218971	0.0817833	2.82211	TRUE	TRUE	TRUE	FALSE
Golm2	283.358	-0.421076	0.0310765	0.104878	3.64055	TRUE	FALSE	TRUE	FALSE
Knl1	381.537	-1.30315	8.9e-09	3.98e-07	3.90526	FALSE	FALSE	TRUE	FALSE
Casd1	79.0694	-0.935093	0.001428	0.0103612	5.32955	TRUE	TRUE	TRUE	TRUE
Casp1	13.0481	-1.98183	0.00323259	0.019498	1.67684	FALSE	FALSE	FALSE	FALSE
Casp8	7.22542	2.21	0.0285999	0.0987275	4.47476	TRUE	TRUE	TRUE	TRUE
Casp8ap2	107.688	-0.794502	0.0109702	0.048827	2.50357	TRUE	TRUE	TRUE	FALSE
Casq1	12.6493	-1.73773	0.00742068	0.0363062	2.81441	FALSE	TRUE	TRUE	FALSE
Cast	891.203	-0.593117	0.0138461	0.058002	1.46064	TRUE	TRUE	TRUE	TRUE
Catsperb	538.05	-1.32103	1.11e-08	4.8e-07	3.44659	FALSE	FALSE	FALSE	FALSE
Catsperg1	588.05	-1.21933	9.63e-06	0.000174215	3.35538	TRUE	FALSE	FALSE	FALSE
Catsperg2	597.175	-0.90542	4.82e-05	0.000661232	2.76956	TRUE	FALSE	TRUE	FALSE
Cav2	13.1675	-2.10868	0.0010298	0.00794146	3.62341	TRUE	TRUE	TRUE	FALSE
Cbfa2t2	153.858	0.551123	0.038941	0.123262	1.95109	TRUE	TRUE	TRUE	TRUE
Cbfb	97.9685	-0.758815	0.00401415	0.0229636	4.77886	TRUE	TRUE	TRUE	TRUE
Cbr1	41.7933	1.34728	0.00153528	0.0109578	3.61438	TRUE	TRUE	FALSE	FALSE
Cbwd1	132.368	-1.11372	0.00097415	0.00760382	1.60642	FALSE	TRUE	TRUE	FALSE
Cbx4	33.2622	1.63181	0.00055111	0.00484904	4.18299	TRUE	TRUE	TRUE	FALSE
Cbx5	533.475	-1.13179	1.38e-07	4.36e-06	4.95961	TRUE	TRUE	TRUE	TRUE
Cbx7	119.785	0.707064	0.0115296	0.0505369	2.73836	TRUE	TRUE	TRUE	TRUE
Cby1	201.802	0.757494	0.00325564	0.0196208	2.28458	TRUE	TRUE	TRUE	FALSE
Cc2d1a	145.142	1.14392	6.67e-06	0.000126921	6.36212	TRUE	TRUE	TRUE	FALSE
Ccar1	541.506	-1.1487	5.63e-06	0.000109409	2.6397	TRUE	TRUE	TRUE	TRUE
Ccar2	284.867	0.975527	0.000340896	0.00332912	3.38887	TRUE	TRUE	TRUE	TRUE
Ccbe1	96.4436	-0.939981	0.00244715	0.015731	3.15136	TRUE	TRUE	TRUE	FALSE
Ccdc105	307.368	1.25428	1.55e-09	8.2e-08	6.99937	FALSE	TRUE	TRUE	FALSE
Ccdc107	23.7159	1.42678	0.00574292	0.0299431	5.05352	FALSE	FALSE	FALSE	FALSE
Cfap65	1164.59	-0.530671	0.0327227	0.108543	1.67161	TRUE	FALSE	FALSE	FALSE
Odad1	135.51	0.542191	0.032425	0.107969	2.9003	TRUE	FALSE	FALSE	FALSE
Ccdc117	548.16	-0.530143	0.00520302	0.0278239	2.98821	TRUE	TRUE	TRUE	FALSE
Ccdc12	51.8339	0.692557	0.0493521	0.145877	3.06543	FALSE	FALSE	FALSE	FALSE
Ccdc124	109.64	1.06848	0.00167741	0.0117094	2.52111	FALSE	TRUE	FALSE	FALSE
Ccdc13	416.559	0.517656	0.016927	0.0674936	2.31963	FALSE	TRUE	TRUE	FALSE
Ccdc138	117.287	-0.632315	0.0148287	0.0609237	3.53578	TRUE	FALSE	TRUE	FALSE
Ccdc14	130.746	-1.25643	3.79e-06	7.85e-05	4.66957	TRUE	TRUE	TRUE	TRUE
Ccdc146	334.88	-0.564889	0.0123384	0.0531133	2.39982	FALSE	FALSE	TRUE	FALSE
Ccdc15	137.113	-0.939738	0.00107997	0.00824755	2.12769	TRUE	TRUE	TRUE	FALSE
Ccdc150	748.952	-0.968754	9.13e-06	0.000167272	2.75899	TRUE	TRUE	TRUE	FALSE
Kash5	245.106	1.02561	4.6e-05	0.000636463	3.81611	FALSE	FALSE	FALSE	FALSE
Ccdc158	578.72	-0.534606	0.00629852	0.0322171	3.07212	TRUE	TRUE	TRUE	FALSE
Ccdc163	192.714	-0.997493	2.31e-06	5.12e-05	7.12949	TRUE	TRUE	TRUE	FALSE
Ccdc167	7.93662	-1.66752	0.0323843	0.107875	3.07134	TRUE	TRUE	TRUE	TRUE
Ccdc172	81.7656	-0.685961	0.0489586	0.145024	1.25511	FALSE	TRUE	FALSE	FALSE
Ccdc173	457.33	-1.17324	5.23e-07	1.39e-05	2.55543	FALSE	FALSE	FALSE	FALSE
Ccdc175	633.465	-0.995797	0.000349747	0.00339449	1.6093	FALSE	FALSE	FALSE	FALSE
Bbof1	908.178	-0.961693	0.000525536	0.00468059	1.5198	TRUE	FALSE	TRUE	TRUE
Ccdc177	6.9879	-1.78304	0.0435409	0.133123	1.6765	TRUE	TRUE	TRUE	FALSE
Ccdc178	631.445	-1.29318	2.82e-06	6.05e-05	1.95255	TRUE	TRUE	TRUE	FALSE
Ccdc18	189.43	-1.56238	1.97e-06	4.45e-05	2.63862	TRUE	TRUE	FALSE	TRUE
Ccdc184	106.381	0.73554	0.0176923	0.0699006	2.22539	TRUE	TRUE	TRUE	FALSE
Ccdc185	643.283	0.541279	0.0109868	0.0488755	2.48148	FALSE	FALSE	FALSE	FALSE
Ccdc186	435.676	-0.953709	0.000918444	0.00725738	1.49785	FALSE	FALSE	TRUE	FALSE
Ccdc24	190.295	0.64563	0.00462281	0.0255584	4.12733	TRUE	TRUE	TRUE	FALSE
Ccdc27	263.189	0.485285	0.0218031	0.0815789	3.2384	FALSE	FALSE	TRUE	FALSE
Ccdc30	1364.31	-0.448705	0.0266982	0.0945196	1.65124	TRUE	FALSE	TRUE	FALSE
Ccdc34	137.061	-0.73822	0.00139785	0.0101933	8.58013	TRUE	TRUE	TRUE	FALSE
Cfap100	176.725	-0.470514	0.0372021	0.119175	3.56874	TRUE	FALSE	FALSE	FALSE
Ccdc38	1917.38	-0.836366	0.000206884	0.00220723	2.04704	TRUE	TRUE	TRUE	TRUE
Ccdc39	795.607	-1.37007	3.53e-09	1.75e-07	2.78763	TRUE	TRUE	FALSE	TRUE
Ccdc42	318.65	1.05764	1.12e-05	0.000197284	3.75533	TRUE	TRUE	TRUE	FALSE
Ccdc47	142.298	-0.912784	0.00186209	0.0127567	2.1825	TRUE	TRUE	TRUE	TRUE
Ccdc54	1278.26	-0.972024	0.000109714	0.00132769	1.87065	FALSE	FALSE	FALSE	FALSE
Nsrp1	149.202	-0.957399	0.000432209	0.00402334	2.90061	TRUE	FALSE	TRUE	FALSE
Ccdc57	175.645	0.814351	0.00277267	0.0172656	2.60555	TRUE	FALSE	FALSE	FALSE
Ccdc60	1654.02	0.367889	0.0281251	0.0978104	3.01442	TRUE	TRUE	TRUE	FALSE
Ccdc61	67.8971	0.938149	0.00463846	0.0256122	3.54622	FALSE	FALSE	TRUE	FALSE
Ccdc62	622.899	-0.372042	0.0362841	0.116948	2.5496	FALSE	TRUE	TRUE	FALSE
Bicdl1	34.9634	-1.77579	7.36e-06	0.000138641	5.13557	TRUE	FALSE	TRUE	FALSE
Ccdc65	825.701	0.315465	0.0459818	0.138626	10.1176	TRUE	FALSE	TRUE	FALSE
Ccdc66	148.483	-0.485173	0.0328567	0.108865	5.31831	TRUE	TRUE	TRUE	FALSE
Ccdc68	4.04655	-3.98371	0.00270016	0.0169114	2.89418	TRUE	TRUE	FALSE	FALSE
Ccdc70	536.966	-0.466983	0.0448969	0.136198	1.31209	TRUE	FALSE	TRUE	FALSE
Ccdc71	89.8139	0.925279	0.00270815	0.0169492	3.24886	TRUE	TRUE	TRUE	TRUE
Ccdc71l	37.7959	-0.942245	0.0235755	0.0863618	1.61461	TRUE	TRUE	TRUE	FALSE
Ccdc73	168.803	-0.829515	0.000682212	0.00570598	4.47298	TRUE	FALSE	TRUE	FALSE
Ccdc74a	126.795	0.836819	0.0027765	0.017277	3.45813	TRUE	FALSE	FALSE	FALSE
Terb1	116.76	-0.592164	0.039691	0.124882	1.48879	TRUE	FALSE	FALSE	FALSE
Ccdc7b	649.57	-1.18109	3.84e-05	0.000549123	1.61372	TRUE	FALSE	FALSE	FALSE
Ccdc8	12.9704	1.85121	0.0296096	0.101178	1.35467	FALSE	TRUE	TRUE	FALSE
Ccdc81	646.887	-0.464869	0.0087011	0.0409276	3.54181	FALSE	TRUE	FALSE	FALSE
Ccdc83	341.266	-0.833362	0.00788743	0.0380412	1.18507	TRUE	FALSE	TRUE	FALSE
Ccdc86	100.466	0.58452	0.0312945	0.105394	3.58669	TRUE	TRUE	TRUE	FALSE
Ccdc88a	1014.62	-1.09204	4.63e-05	0.000639764	2.21962	TRUE	TRUE	TRUE	TRUE
Ccdc9	86.7374	0.880115	0.00849008	0.0402523	2.22679	TRUE	FALSE	TRUE	FALSE
Ccdc92	1294.22	0.86987	6.76e-08	2.33e-06	11.1867	TRUE	TRUE	TRUE	FALSE
Cchcr1	1028.3	0.455597	0.0297895	0.101608	1.68001	FALSE	TRUE	FALSE	FALSE
Ccl19	1.54161	-5.0586	0.0231546	0.085217	1.57307	TRUE	TRUE	FALSE	FALSE
Ccl22	15.5405	-2.24683	0.000503078	0.00452925	2.47632	TRUE	TRUE	TRUE	FALSE
Ccl27a	133.087	1.11649	0.00082771	0.00667452	1.93805	FALSE	FALSE	FALSE	FALSE
Ccm2	34.7004	1.15973	0.0114767	0.0504071	2.8879	TRUE	TRUE	TRUE	FALSE
Ccna1	391.231	0.716213	0.000701476	0.00583327	3.18599	TRUE	FALSE	FALSE	FALSE
Ccnb1	177.663	0.609721	0.0314621	0.105719	1.71277	TRUE	TRUE	TRUE	FALSE
Ccnc	83.0111	-1.41947	3.29e-07	9.17e-06	7.41221	TRUE	TRUE	TRUE	TRUE
Ccne2	82.8073	-0.698626	0.0271702	0.0955456	2.16345	TRUE	TRUE	TRUE	FALSE
Ccnjl	11.0214	1.70332	0.027756	0.0969359	2.99418	TRUE	TRUE	TRUE	FALSE
Ccnk	2037.63	-0.550626	0.00138791	0.0101412	4.05286	TRUE	TRUE	TRUE	FALSE
Ccnl1	178.411	-0.710655	0.010826	0.0483591	1.48897	TRUE	TRUE	FALSE	FALSE
Ccnt2	78.0904	-0.79632	0.0085602	0.0404628	2.31988	TRUE	TRUE	TRUE	FALSE
Ccr7	11.2606	-2.31632	0.00216223	0.0143142	2.66975	TRUE	TRUE	TRUE	FALSE
Ccs	88.474	0.651975	0.0268428	0.0947796	2.87438	TRUE	TRUE	FALSE	TRUE
Ccsap	236.112	0.481209	0.0417633	0.129171	1.94704	TRUE	TRUE	TRUE	FALSE
Ccser2	780.411	-0.666403	0.00458337	0.0254053	1.55971	TRUE	TRUE	TRUE	TRUE
Cct3	1200.33	0.476019	0.0333582	0.110144	1.4059	TRUE	TRUE	TRUE	FALSE
Cct6a	514.219	0.431596	0.0341977	0.112139	1.93593	TRUE	TRUE	FALSE	FALSE
Cct7	1637.25	0.437335	0.0168667	0.0673308	2.38788	TRUE	FALSE	TRUE	FALSE
Cd109	283.939	-1.02662	0.00025199	0.00259565	1.85001	TRUE	TRUE	TRUE	FALSE
Cd151	195.553	1.00353	7.28e-05	0.00093343	3.84777	TRUE	TRUE	TRUE	FALSE
Cd164	1032.47	-0.905845	5.09e-07	1.36e-05	4.76956	TRUE	TRUE	TRUE	FALSE
Cd209a	3.42395	-3.82664	0.0079853	0.0383636	6.13679	TRUE	TRUE	TRUE	FALSE
Cd36	422.971	-2.42333	2.77e-26	6.84e-24	10.379	TRUE	TRUE	TRUE	FALSE
Cd44	9.02535	-3.50727	3.32e-05	0.000486311	3.47842	TRUE	TRUE	TRUE	FALSE
Cd46	84.7193	-1.77134	1.76e-07	5.38e-06	2.43881	FALSE	TRUE	TRUE	FALSE
Cd47	39.145	1.08907	0.0128381	0.0547877	2.3132	TRUE	TRUE	TRUE	FALSE
Cd52	8.17942	3.5397	0.00460386	0.0254963	3.0689	FALSE	TRUE	TRUE	FALSE
Cd53	11.838	-1.90412	0.0117483	0.051236	1.31161	TRUE	TRUE	TRUE	TRUE
Cd5l	12.6022	-1.95001	0.0029261	0.0180007	4.1824	TRUE	TRUE	TRUE	TRUE
Cd63	44.8236	1.50548	0.000363067	0.00350216	4.45769	TRUE	TRUE	TRUE	FALSE
Cd74	31.7161	2.17405	5.98e-05	0.000794645	2.79992	TRUE	TRUE	TRUE	FALSE
Cd99l2	50.7569	1.56041	6.39e-05	0.000840672	4.1126	TRUE	TRUE	TRUE	FALSE
Cdadc1	80.333	-0.619375	0.0448681	0.136198	1.51377	TRUE	TRUE	TRUE	FALSE
Cdc20	382.269	1.03301	2.16e-07	6.42e-06	7.9523	TRUE	FALSE	FALSE	FALSE
Cdc25a	251.96	0.608025	0.00780696	0.0377324	2.59753	TRUE	FALSE	TRUE	FALSE
Cdc27	893.545	-0.754811	6.9e-05	0.000892333	4.22309	TRUE	TRUE	TRUE	TRUE
Cdc34	696.864	1.47816	2.8e-11	2.06e-09	3.81463	TRUE	TRUE	TRUE	TRUE
Cdc37	162.949	1.11287	1.35e-05	0.000230517	5.36078	TRUE	TRUE	TRUE	TRUE
Cdc37l1	397.955	-0.911808	5.12e-07	1.36e-05	8.53309	TRUE	TRUE	TRUE	TRUE
Cdc42bpa	183.983	-0.640384	0.0249947	0.0899984	2.13495	TRUE	TRUE	TRUE	FALSE
Cdc42bpb	218.224	0.966241	0.000249102	0.00257509	2.50849	TRUE	TRUE	TRUE	FALSE
Cdc42ep3	561.178	-0.759525	0.000164146	0.00185294	2.74951	TRUE	TRUE	TRUE	FALSE
Cdc42ep5	46.2053	1.41032	0.0004888	0.00442863	3.77926	FALSE	FALSE	FALSE	FALSE
Cdc7	77.9517	-0.773026	0.00579065	0.0301375	6.38397	TRUE	TRUE	TRUE	TRUE
Cdc73	198.701	-0.652038	0.00433446	0.0243988	2.5972	TRUE	TRUE	TRUE	TRUE
Cdca7	12.0142	1.44894	0.0448711	0.136198	3.30355	TRUE	TRUE	TRUE	FALSE
Cdh20	2.3567	3.71737	0.0347824	0.113568	2.20653	TRUE	TRUE	TRUE	FALSE
Cdh22	41.9009	-4.30689	1.24e-18	2.11e-16	3.88582	TRUE	FALSE	TRUE	FALSE
Cdh4	14.1145	-2.51441	3.87e-05	0.000552283	5.88724	TRUE	TRUE	TRUE	FALSE
Cdh9	6.18939	-2.52722	0.0160115	0.0646775	1.70353	FALSE	TRUE	TRUE	TRUE
Cdhr5	18.0245	1.87731	0.00457897	0.0253945	2.97196	TRUE	TRUE	FALSE	FALSE
Cdk10	82.0958	0.788527	0.0118557	0.0516128	2.84059	TRUE	TRUE	TRUE	TRUE
Cdk11b	181.059	0.50112	0.032829	0.108812	2.73831	TRUE	FALSE	TRUE	FALSE
Cdk12	315.531	-0.562011	0.0472344	0.141515	1.62966	TRUE	TRUE	TRUE	TRUE
Cdk16	413.992	0.416825	0.0246417	0.0892665	3.77319	TRUE	TRUE	TRUE	FALSE
Cdk19	401.452	-0.479645	0.01873	0.0729301	2.59603	TRUE	TRUE	TRUE	TRUE
Cdk20	131.534	0.660585	0.0220102	0.0820522	1.87283	FALSE	TRUE	TRUE	FALSE
Cdk2ap1	19.9467	1.39913	0.0139407	0.0582715	3.14706	FALSE	TRUE	TRUE	FALSE
Cdk2ap2	16.9749	1.42465	0.0373306	0.119432	2.39749	TRUE	TRUE	TRUE	TRUE
Cdk5rap3	227.679	0.505339	0.0296992	0.10139	2.39511	TRUE	TRUE	TRUE	FALSE
Cdk8	690.813	-4.02135	3.24e-80	1.93e-77	6.91846	TRUE	TRUE	TRUE	TRUE
Cdk9	65.2163	1.20702	0.00238111	0.0154038	3.00314	TRUE	TRUE	TRUE	TRUE
Cdkal1	391.654	-0.50375	0.0230583	0.084935	1.85917	TRUE	TRUE	TRUE	TRUE
Cdkl2	620.782	-0.379281	0.0350878	0.114242	2.71616	TRUE	TRUE	TRUE	TRUE
Cdkl3	1463.06	-0.47585	0.0124605	0.0535456	1.92459	TRUE	TRUE	TRUE	FALSE
Cdkn1c	35.6015	1.52141	0.0024239	0.015606	2.60236	TRUE	FALSE	TRUE	FALSE
Cdkn2a	5.53689	4.96252	0.000538407	0.00476336	32.036	TRUE	TRUE	TRUE	TRUE
Cdr1	2.00075	-4.40975	0.0165116	0.0662031	14.4705	FALSE	TRUE	FALSE	FALSE
Cdrt4os1	7.96016	-2.10423	0.0114759	0.0504071	2.19534	FALSE	FALSE	FALSE	FALSE
Chek2	538.196	0.472107	0.00595349	0.0308366	7.21966	TRUE	TRUE	TRUE	FALSE
Cds2	132.598	0.606825	0.0288684	0.0994084	1.987	TRUE	TRUE	TRUE	TRUE
Cdv3	967.819	1.2126	1.69e-13	1.79e-11	13.4989	TRUE	TRUE	TRUE	FALSE
Cebpa	295.018	-5.1733	4.71e-90	3.71e-87	14.4345	TRUE	TRUE	TRUE	FALSE
Cebpb	9.18564	3.05815	0.00540105	0.0285652	2.39634	FALSE	TRUE	TRUE	FALSE
Cela3a	2.18248	-5.55545	0.00616933	0.0317173	1.3785	FALSE	TRUE	TRUE	FALSE
Celf2	136.114	-0.699269	0.00894521	0.041758	2.02574	TRUE	TRUE	TRUE	TRUE
Celf3	140.696	-0.806494	0.00713991	0.035332	1.74352	TRUE	TRUE	TRUE	TRUE
Celf5	88.1081	-0.739164	0.0175604	0.0695066	2.43327	TRUE	TRUE	TRUE	TRUE
Cenpb	69.2179	1.16887	0.000490416	0.00442975	4.06247	TRUE	TRUE	TRUE	FALSE
Cenpe	511.214	-0.768012	0.0108953	0.0485663	1.92594	TRUE	FALSE	TRUE	FALSE
Cenpf	935.794	-1.18842	3.46e-05	0.000504555	4.14921	TRUE	TRUE	TRUE	TRUE
Cenpi	58.8377	-1.23242	0.000227381	0.00239199	4.88052	TRUE	TRUE	TRUE	FALSE
Cenpj	164.821	-0.911206	9.95e-05	0.00122141	4.52458	TRUE	TRUE	FALSE	FALSE
Cenpk	69.2502	-1.11697	0.0019113	0.0130498	1.80754	TRUE	TRUE	TRUE	FALSE
Cenpl	85.5263	-1.33384	0.000131349	0.00153685	2.33555	TRUE	TRUE	TRUE	FALSE
Cenpp	123.685	-0.788286	0.00637699	0.0324895	1.73187	TRUE	FALSE	FALSE	FALSE
Cenpq	74.1545	-0.796656	0.00675133	0.0338643	4.44945	TRUE	TRUE	TRUE	FALSE
Cenpt	28.4046	1.18364	0.0135831	0.0572051	3.28648	FALSE	FALSE	TRUE	FALSE
Cenpv	922.235	0.496544	0.00934444	0.0432484	2.30554	FALSE	FALSE	FALSE	FALSE
Cep104	394.181	0.477864	0.012751	0.0544828	3.73004	TRUE	TRUE	FALSE	FALSE
Cep112	676.489	-0.731552	0.0127931	0.0546495	1.14589	TRUE	TRUE	TRUE	FALSE
Cep126	995.573	-0.627391	0.00249046	0.0159263	2.53845	TRUE	FALSE	FALSE	FALSE
Cep128	1560.13	-0.722853	0.000301131	0.0030035	3.6789	TRUE	TRUE	TRUE	TRUE
Cep135	159.093	-1.03575	3.92e-05	0.000557089	3.39556	TRUE	TRUE	TRUE	FALSE
Cep162	260.103	-0.91458	3.77e-05	0.000541758	3.70556	TRUE	TRUE	TRUE	FALSE
Cep170	690.924	-0.799968	3.53e-05	0.000513221	3.32277	TRUE	TRUE	TRUE	FALSE
Cep170b	242.739	1.36265	2.6e-06	5.65e-05	2.72413	TRUE	TRUE	TRUE	TRUE
Cep192	568.926	-1.02879	5.08e-07	1.36e-05	4.9517	TRUE	TRUE	FALSE	TRUE
Cep290	1016.96	-1.3635	6.51e-07	1.66e-05	2.00428	TRUE	TRUE	TRUE	TRUE
Cep295	725.016	-1.15286	1.28e-08	5.4e-07	4.33835	TRUE	FALSE	FALSE	FALSE
Cep350	1593.17	-0.640715	0.0105529	0.0474393	2.20239	TRUE	TRUE	TRUE	TRUE
Cep55	137.118	-0.640144	0.0116354	0.0509234	2.64009	TRUE	TRUE	TRUE	TRUE
Cep57	939.949	-0.719316	0.00453822	0.0252115	1.55527	TRUE	TRUE	TRUE	TRUE
Cep70	227.345	-0.946457	0.000821295	0.00663516	1.64627	TRUE	TRUE	TRUE	TRUE
Cep72	976.32	-0.489751	0.00788729	0.0380412	2.58054	TRUE	TRUE	TRUE	TRUE
Cep83os	740.056	-1.65747	1.1e-22	2.27e-20	14.5846	FALSE	FALSE	FALSE	FALSE
Cep85l	1167.45	-0.664068	0.0144895	0.0597429	1.16952	FALSE	TRUE	TRUE	FALSE
Cep89	340.504	0.579638	0.00200518	0.013539	7.43998	TRUE	TRUE	TRUE	FALSE
Cep95	316.995	-0.401313	0.0356204	0.115476	3.85979	TRUE	FALSE	FALSE	FALSE
Cept1	31.9844	-1.39966	0.0103969	0.0469639	1.19324	TRUE	TRUE	TRUE	TRUE
Cercam	30.9627	1.35951	0.00580139	0.0301752	2.63009	TRUE	TRUE	TRUE	FALSE
Cerk	560.998	-0.72167	0.00058932	0.00509655	4.10737	TRUE	TRUE	TRUE	TRUE
Ces1a	16.2553	-1.27472	0.0222713	0.0826871	3.39273	FALSE	FALSE	TRUE	FALSE
Ces1d	94.6626	1.34972	0.000665053	0.00559763	2.81962	FALSE	TRUE	FALSE	FALSE
Ces5a	14.8351	-1.43575	0.0332275	0.109874	2.36261	TRUE	FALSE	TRUE	FALSE
Cetn1	1339.71	-0.644021	0.0193097	0.0746773	1.13503	FALSE	TRUE	TRUE	TRUE
Cetn3	320.047	-0.821345	0.00500571	0.027053	1.31429	TRUE	TRUE	FALSE	TRUE
Cfap126	504.069	-0.634939	0.00841418	0.040013	1.67146	FALSE	FALSE	TRUE	FALSE
Cfap36	1426.95	-0.804113	5.54e-05	0.000743362	2.89132	TRUE	FALSE	TRUE	FALSE
Cfap43	1203.2	-0.367235	0.0355013	0.115229	2.81769	FALSE	FALSE	TRUE	FALSE
Cfap46	398.388	-0.842689	0.00360501	0.0211545	2.52679	TRUE	FALSE	FALSE	FALSE
Cfap53	307.069	-0.789774	0.000410279	0.00385444	2.50041	TRUE	FALSE	FALSE	FALSE
Cfap57	862.419	-0.502118	0.00930386	0.0431193	2.79938	FALSE	FALSE	TRUE	FALSE
Cfap58	534.743	-0.615667	0.0129855	0.0552801	1.76207	TRUE	TRUE	TRUE	FALSE
Cfap69	1475.04	-0.565129	0.00222475	0.0146298	3.024	TRUE	FALSE	FALSE	FALSE
Cfap74	234.558	-0.627357	0.0439599	0.134072	1.51084	TRUE	FALSE	TRUE	FALSE
Cfap97	1943.58	-0.807146	5.51e-06	0.000107346	3.78676	TRUE	FALSE	TRUE	TRUE
Cfhr1	28.2632	-1.81952	0.000399207	0.00376473	3.33936	TRUE	FALSE	TRUE	FALSE
Cfl2	325.617	-0.558533	0.0119596	0.0519742	2.07914	TRUE	TRUE	TRUE	TRUE
Cftr	216.546	-2.01655	5.04e-17	7.39e-15	4.30924	TRUE	TRUE	TRUE	FALSE
Cggbp1	512.407	-1.70756	3.91e-18	6.21e-16	7.55847	TRUE	TRUE	TRUE	TRUE
Cgnl1	175.599	0.80157	0.000873932	0.00697252	3.63355	TRUE	TRUE	TRUE	FALSE
Chaf1a	553.392	0.901498	0.000156709	0.0017806	2.49349	TRUE	FALSE	TRUE	FALSE
Chaf1b	42.6679	0.939287	0.0301347	0.102463	1.79711	TRUE	FALSE	FALSE	FALSE
[truncated: 4,621 more rows]

## Sheet: quadKO
Symbol	baseMean	log2FoldChange	pvalue	padj	Cohen_d	microrna.org	Targetscan	mirwalk	mirdb
[truncated: 7,810 more rows]

[truncated: 1 more sheets: quinKO]
